# Supplementary material for: Componential usage patterns in dengue 4 viruses reveal their better evolutionary adaptation to humans
Source: Front Microbiol. 2022 Sep 20;13:935678. doi: 10.3389/fmicb.2022.935678 (PMC9530264; doi:10.3389/fmicb.2022.935678)
Supplement: Supplementary File 1 — Dengue viruses information. [file Data_Sheet_1.xls]

## Sheet: Dengue 1 viruses (n=1817)
Accession number in the NCBI
OK605753.1_cds_UDI89626.1_1 [gene=POLY] [protein=polyprotein] [protein_id=UDI89626.1] [location
OK605754.1_cds_UDI89627.1_1 [gene=POLY] [protein=polyprotein] [protein_id=UDI89627.1] [location
OK605755.1_cds_UDI89628.1_1 [gene=POLY] [protein=polyprotein] [protein_id=UDI89628.1] [location
OK605756.1_cds_UDI89629.1_1 [gene=POLY] [protein=polyprotein] [protein_id=UDI89629.1] [location
OL452067.1_cds_UEP66935.1_1 [gene=POLY] [protein=polyprotein] [protein_id=UEP66935.1] [location
OM033409.1_cds_UHR01891.1_1 [gene=POLY] [protein=polyprotein] [protein_id=UHR01891.1] [location
OL411495.1_cds_UEK34806.1_1 [gene=POLY] [protein=polyprotein] [protein_id=UEK34806.1] [location
OL411496.1_cds_UEK34807.1_1 [gene=POLY] [protein=polyprotein] [protein_id=UEK34807.1] [location
OL411497.1_cds_UEK34808.1_1 [gene=POLY] [protein=polyprotein] [protein_id=UEK34808.1] [location
OL411498.1_cds_UEK34809.1_1 [gene=POLY] [protein=polyprotein] [protein_id=UEK34809.1] [location
OL411499.1_cds_UEK34810.1_1 [gene=POLY] [protein=polyprotein] [protein_id=UEK34810.1] [location
OL412140.1_cds_UEK35279.1_1 [gene=POLY] [protein=polyprotein] [protein_id=UEK35279.1] [location
OL412678.1_cds_UEK36471.1_1 [gene=POLY] [protein=polyprotein] [protein_id=UEK36471.1] [location
OL412703.1_cds_UEK36472.1_1 [gene=POLY] [protein=polyprotein] [protein_id=UEK36472.1] [location
OK562728.1_cds_UDE31773.1_1 [gene=POLY] [protein=polyprotein] [protein_id=UDE31773.1] [location
OK079104.1_cds_UAJ23633.1_1 [gene=POLY] [protein=polyprotein] [protein_id=UAJ23633.1] [location
MZ945530.1_cds_QZN14214.1_1 [gene=POLY] [protein=polyprotein] [protein_id=QZN14214.1] [location
LC646544.1_cds_BDA39161.1_1 [gene=POLY] [protein=polyprotein] [protein_id=BDA39161.1] [location
MW315172.1_cds_QPK41392.1_1 [gene=POLY] [protein=polyprotein] [protein_id=QPK41392.1] [location
MW315175.1_cds_QPK41395.1_1 [gene=POLY] [protein=polyprotein] [protein_id=QPK41395.1] [location
MW315176.1_cds_QPK41396.1_1 [gene=POLY] [protein=polyprotein] [protein_id=QPK41396.1] [location
MW315177.1_cds_QPK41397.1_1 [gene=POLY] [protein=polyprotein] [protein_id=QPK41397.1] [location
MW315178.1_cds_QPK41398.1_1 [gene=POLY] [protein=polyprotein] [protein_id=QPK41398.1] [location
MW315181.1_cds_QPK41401.1_1 [gene=POLY] [protein=polyprotein] [protein_id=QPK41401.1] [location
MW315182.1_cds_QPK41402.1_1 [gene=POLY] [protein=polyprotein] [protein_id=QPK41402.1] [location
MW315183.1_cds_QPK41403.1_1 [gene=POLY] [protein=polyprotein] [protein_id=QPK41403.1] [location
MW315185.1_cds_QPK41405.1_1 [gene=POLY] [protein=polyprotein] [protein_id=QPK41405.1] [location
MW315188.1_cds_QPK41408.1_1 [gene=POLY] [protein=polyprotein] [protein_id=QPK41408.1] [location
MW315189.1_cds_QPK41409.1_1 [gene=POLY] [protein=polyprotein] [protein_id=QPK41409.1] [location
MW315191.1_cds_QPK41411.1_1 [gene=POLY] [protein=polyprotein] [protein_id=QPK41411.1] [location
MW315194.1_cds_QPK41414.1_1 [gene=POLY] [protein=polyprotein] [protein_id=QPK41414.1] [location
MW315195.1_cds_QPK41415.1_1 [gene=POLY] [protein=polyprotein] [protein_id=QPK41415.1] [location
MW191720.1_cds_QOU99787.1_1 [gene=POLY] [protein=polyprotein] [protein_id=QOU99787.1] [location
MW191721.1_cds_QOU99788.1_1 [gene=POLY] [protein=polyprotein] [protein_id=QOU99788.1] [location
MW191722.1_cds_QOU99789.1_1 [gene=POLY] [protein=polyprotein] [protein_id=QOU99789.1] [location
MW191723.1_cds_QOU99790.1_1 [gene=POLY] [protein=polyprotein] [protein_id=QOU99790.1] [location
MW191724.1_cds_QOU99791.1_1 [gene=POLY] [protein=polyprotein] [protein_id=QOU99791.1] [location
MW191725.1_cds_QOU99792.1_1 [gene=POLY] [protein=polyprotein] [protein_id=QOU99792.1] [location
MW362471.1_cds_QPQ49764.1_1 [gene=POLY] [protein=polyprotein] [protein_id=QPQ49764.1] [location
MW362472.1_cds_QPQ49765.1_1 [gene=POLY] [protein=polyprotein] [protein_id=QPQ49765.1] [location
MW362473.1_cds_QPQ49766.1_1 [gene=POLY] [protein=polyprotein] [protein_id=QPQ49766.1] [location
MW362474.1_cds_QPQ49767.1_1 [gene=POLY] [protein=polyprotein] [protein_id=QPQ49767.1] [location
MW362475.1_cds_QPQ49768.1_1 [gene=POLY] [protein=polyprotein] [protein_id=QPQ49768.1] [location
MW362476.1_cds_QPQ49769.1_1 [gene=POLY] [protein=polyprotein] [protein_id=QPQ49769.1] [location
MW362477.1_cds_QPQ49770.1_1 [gene=POLY] [protein=polyprotein] [protein_id=QPQ49770.1] [location
MW582813.1_cds_QRI93542.1_1 [gene=POLY] [protein=polyprotein] [protein_id=QRI93542.1] [location
MW582814.1_cds_QRI93543.1_1 [gene=POLY] [protein=polyprotein] [protein_id=QRI93543.1] [location
MW582815.1_cds_QRI93544.1_1 [gene=POLY] [protein=polyprotein] [protein_id=QRI93544.1] [location
MW582816.1_cds_QRI93545.1_1 [gene=POLY] [protein=polyprotein] [protein_id=QRI93545.1] [location
MT832032.1_cds_QMT58599.1_1 [gene=POLY] [protein=polyprotein] [protein_id=QMT58599.1] [location
MT832033.1_cds_QMT58600.1_1 [gene=POLY] [protein=polyprotein] [protein_id=QMT58600.1] [location
MT832035.1_cds_QMT58602.1_1 [gene=POLY] [protein=polyprotein] [protein_id=QMT58602.1] [location
MT832036.1_cds_QMT58603.1_1 [gene=POLY] [protein=polyprotein] [protein_id=QMT58603.1] [location
MT832037.1_cds_QMT58604.1_1 [gene=POLY] [protein=polyprotein] [protein_id=QMT58604.1] [location
MT832038.1_cds_QMT58605.1_1 [gene=POLY] [protein=polyprotein] [protein_id=QMT58605.1] [location
MT832039.1_cds_QMT58606.1_1 [gene=POLY] [protein=polyprotein] [protein_id=QMT58606.1] [location
MT832040.1_cds_QMT58607.1_1 [gene=POLY] [protein=polyprotein] [protein_id=QMT58607.1] [location
MT832041.1_cds_QMT58608.1_1 [gene=POLY] [protein=polyprotein] [protein_id=QMT58608.1] [location
MT832042.1_cds_QMT58609.1_1 [gene=POLY] [protein=polyprotein] [protein_id=QMT58609.1] [location
MT832043.1_cds_QMT58610.1_1 [gene=POLY] [protein=polyprotein] [protein_id=QMT58610.1] [location
MT832044.1_cds_QMT58611.1_1 [gene=POLY] [protein=polyprotein] [protein_id=QMT58611.1] [location
MT832045.1_cds_QMT58612.1_1 [gene=POLY] [protein=polyprotein] [protein_id=QMT58612.1] [location
MT832046.1_cds_QMT58613.1_1 [gene=POLY] [protein=polyprotein] [protein_id=QMT58613.1] [location
MT832047.1_cds_QMT58614.1_1 [gene=POLY] [protein=polyprotein] [protein_id=QMT58614.1] [location
MT832048.1_cds_QMT58615.1_1 [gene=POLY] [protein=polyprotein] [protein_id=QMT58615.1] [location
MT832049.1_cds_QMT58616.1_1 [gene=POLY] [protein=polyprotein] [protein_id=QMT58616.1] [location
MT832050.1_cds_QMT58617.1_1 [gene=POLY] [protein=polyprotein] [protein_id=QMT58617.1] [location
MT832051.1_cds_QMT58618.1_1 [gene=POLY] [protein=polyprotein] [protein_id=QMT58618.1] [location
MT832052.1_cds_QMT58619.1_1 [gene=POLY] [protein=polyprotein] [protein_id=QMT58619.1] [location
MW396465.1_cds_QQD79915.1_1 [gene=POLY] [protein=polyprotein] [protein_id=QQD79915.1] [location
MW396468.1_cds_QQD79918.1_1 [gene=POLY] [protein=polyprotein] [protein_id=QQD79918.1] [location
MW386865.1_cds_QQC97219.1_1 [gene=POLY] [protein=polyprotein] [protein_id=QQC97219.1] [location
MW386867.1_cds_QQC97221.1_1 [gene=POLY] [protein=polyprotein] [protein_id=QQC97221.1] [location
MT929160.1_cds_QNL13176.1_1 [gene=POLY] [protein=polyprotein] [protein_id=QNL13176.1] [location
MN886865.1_cds_QIC53485.1_1 [gene=POLY] [protein=polyprotein] [protein_id=QIC53485.1] [location
MN886870.1_cds_QIC53490.1_1 [gene=POLY] [protein=polyprotein] [protein_id=QIC53490.1] [location
MN886874.1_cds_QIC53494.1_1 [gene=POLY] [protein=polyprotein] [protein_id=QIC53494.1] [location
MT899083.1_cds_QNH29581.1_1 [gene=POLY] [protein=polyprotein] [protein_id=QNH29581.1] [location
MT076932.1_cds_QIB99385.1_1 [gene=POLY] [protein=polyprotein] [protein_id=QIB99385.1] [location
MT076933.1_cds_QIB99386.1_1 [gene=POLY] [protein=polyprotein] [protein_id=QIB99386.1] [location
MT076934.1_cds_QIB99387.1_1 [gene=POLY] [protein=polyprotein] [protein_id=QIB99387.1] [location
MT076935.1_cds_QIB99388.1_1 [gene=POLY] [protein=polyprotein] [protein_id=QIB99388.1] [location
MN869904.1_cds_QIC53433.1_1 [gene=POLY] [protein=polyprotein] [protein_id=QIC53433.1] [location
MN869905.1_cds_QIC53434.1_1 [gene=POLY] [protein=polyprotein] [protein_id=QIC53434.1] [location
MN869906.1_cds_QIC53435.1_1 [gene=POLY] [protein=polyprotein] [protein_id=QIC53435.1] [location
MN869907.1_cds_QIC53436.1_1 [gene=POLY] [protein=polyprotein] [protein_id=QIC53436.1] [location
MN869908.1_cds_QIC53437.1_1 [gene=POLY] [protein=polyprotein] [protein_id=QIC53437.1] [location
MN869909.1_cds_QIC53438.1_1 [gene=POLY] [protein=polyprotein] [protein_id=QIC53438.1] [location
MN869910.1_cds_QIC53439.1_1 [gene=POLY] [protein=polyprotein] [protein_id=QIC53439.1] [location
MN869911.1_cds_QIC53440.1_1 [gene=POLY] [protein=polyprotein] [protein_id=QIC53440.1] [location
MN869912.1_cds_QIC53441.1_1 [gene=POLY] [protein=polyprotein] [protein_id=QIC53441.1] [location
MN869913.1_cds_QIC53442.1_1 [gene=POLY] [protein=polyprotein] [protein_id=QIC53442.1] [location
MN869914.1_cds_QIC53443.1_1 [gene=POLY] [protein=polyprotein] [protein_id=QIC53443.1] [location
LC436667.1_cds_BBH51315.1_1 [protein=polyprotein] [protein_id=BBH51315.1] [location=75..10253]
LC436668.1_cds_BBH51316.1_1 [protein=polyprotein] [protein_id=BBH51316.1] [location=75..10253]
MT447147.1_cds_QJQ84559.1_1 [gene=POLY] [protein=polyprotein] [protein_id=QJQ84559.1] [location
MN018285.1_cds_QDG00647.1_1 [gene=POLY] [protein=polyprotein] [protein_id=QDG00647.1] [location
MN018286.1_cds_QDG00648.1_1 [gene=POLY] [protein=polyprotein] [protein_id=QDG00648.1] [location
MN018287.1_cds_QDG00649.1_1 [gene=POLY] [protein=polyprotein] [protein_id=QDG00649.1] [location
MN018288.1_cds_QDG00650.1_1 [gene=POLY] [protein=polyprotein] [protein_id=QDG00650.1] [location
MN018289.1_cds_QDG00651.1_1 [gene=POLY] [protein=polyprotein] [protein_id=QDG00651.1] [location
MN018290.1_cds_QDG00652.1_1 [gene=POLY] [protein=polyprotein] [protein_id=QDG00652.1] [location
MN018291.1_cds_QDG00653.1_1 [gene=POLY] [protein=polyprotein] [protein_id=QDG00653.1] [location
MN018292.1_cds_QDG00654.1_1 [gene=POLY] [protein=polyprotein] [protein_id=QDG00654.1] [location
MN018293.1_cds_QDG00655.1_1 [gene=POLY] [protein=polyprotein] [protein_id=QDG00655.1] [location
MN018294.1_cds_QDG00656.1_1 [gene=POLY] [protein=polyprotein] [protein_id=QDG00656.1] [location
MN018295.1_cds_QDG00657.1_1 [gene=POLY] [protein=polyprotein] [protein_id=QDG00657.1] [location
MN018296.1_cds_QDG00658.1_1 [gene=POLY] [protein=polyprotein] [protein_id=QDG00658.1] [location
MN018297.1_cds_QDG00659.1_1 [gene=POLY] [protein=polyprotein] [protein_id=QDG00659.1] [location
MN018298.1_cds_QDG00660.1_1 [gene=POLY] [protein=polyprotein] [protein_id=QDG00660.1] [location
MN018299.1_cds_QDG00661.1_1 [gene=POLY] [protein=polyprotein] [protein_id=QDG00661.1] [location
MN018300.1_cds_QDG00662.1_1 [gene=POLY] [protein=polyprotein] [protein_id=QDG00662.1] [location
MN018301.1_cds_QDG00663.1_1 [gene=POLY] [protein=polyprotein] [protein_id=QDG00663.1] [location
MN018302.1_cds_QDG00664.1_1 [gene=POLY] [protein=polyprotein] [protein_id=QDG00664.1] [location
MN018303.1_cds_QDG00665.1_1 [gene=POLY] [protein=polyprotein] [protein_id=QDG00665.1] [location
MN018304.1_cds_QDG00666.1_1 [gene=POLY] [protein=polyprotein] [protein_id=QDG00666.1] [location
MN018305.1_cds_QDG00667.1_1 [gene=POLY] [protein=polyprotein] [protein_id=QDG00667.1] [location
MN018306.1_cds_QDG00668.1_1 [gene=POLY] [protein=polyprotein] [protein_id=QDG00668.1] [location
MN018307.1_cds_QDG00669.1_1 [gene=POLY] [protein=polyprotein] [protein_id=QDG00669.1] [location
MN018308.1_cds_QDG00670.1_1 [gene=POLY] [protein=polyprotein] [protein_id=QDG00670.1] [location
MN018309.1_cds_QDG00671.1_1 [gene=POLY] [protein=polyprotein] [protein_id=QDG00671.1] [location
MN018310.1_cds_QDG00672.1_1 [gene=POLY] [protein=polyprotein] [protein_id=QDG00672.1] [location
MN018311.1_cds_QDG00673.1_1 [gene=POLY] [protein=polyprotein] [protein_id=QDG00673.1] [location
MN018312.1_cds_QDG00674.1_1 [gene=POLY] [protein=polyprotein] [protein_id=QDG00674.1] [location
MN018313.1_cds_QDG00675.1_1 [gene=POLY] [protein=polyprotein] [protein_id=QDG00675.1] [location
MN018314.1_cds_QDG00676.1_1 [gene=POLY] [protein=polyprotein] [protein_id=QDG00676.1] [location
MN018315.1_cds_QDG00677.1_1 [gene=POLY] [protein=polyprotein] [protein_id=QDG00677.1] [location
MN018316.1_cds_QDG00678.1_1 [gene=POLY] [protein=polyprotein] [protein_id=QDG00678.1] [location
MN018317.1_cds_QDG00679.1_1 [gene=POLY] [protein=polyprotein] [protein_id=QDG00679.1] [location
MN018318.1_cds_QDG00680.1_1 [gene=POLY] [protein=polyprotein] [protein_id=QDG00680.1] [location
MN018319.1_cds_QDG00681.1_1 [gene=POLY] [protein=polyprotein] [protein_id=QDG00681.1] [location
MN018320.1_cds_QDG00682.1_1 [gene=POLY] [protein=polyprotein] [protein_id=QDG00682.1] [location
MN018321.1_cds_QDG00683.1_1 [gene=POLY] [protein=polyprotein] [protein_id=QDG00683.1] [location
MN018322.1_cds_QDG00684.1_1 [gene=POLY] [protein=polyprotein] [protein_id=QDG00684.1] [location
MN018323.1_cds_QDG00685.1_1 [gene=POLY] [protein=polyprotein] [protein_id=QDG00685.1] [location
MN018324.1_cds_QDG00686.1_1 [gene=POLY] [protein=polyprotein] [protein_id=QDG00686.1] [location
MN018325.1_cds_QDG00687.1_1 [gene=POLY] [protein=polyprotein] [protein_id=QDG00687.1] [location
MN018326.1_cds_QDG00688.1_1 [gene=POLY] [protein=polyprotein] [protein_id=QDG00688.1] [location
MN018327.1_cds_QDG00689.1_1 [gene=POLY] [protein=polyprotein] [protein_id=QDG00689.1] [location
MN018328.1_cds_QDG00690.1_1 [gene=POLY] [protein=polyprotein] [protein_id=QDG00690.1] [location
MN018329.1_cds_QDG00691.1_1 [gene=POLY] [protein=polyprotein] [protein_id=QDG00691.1] [location
MN018330.1_cds_QDG00692.1_1 [gene=POLY] [protein=polyprotein] [protein_id=QDG00692.1] [location
MN018331.1_cds_QDG00693.1_1 [gene=POLY] [protein=polyprotein] [protein_id=QDG00693.1] [location
MN018332.1_cds_QDG00694.1_1 [gene=POLY] [protein=polyprotein] [protein_id=QDG00694.1] [location
MN018333.1_cds_QDG00695.1_1 [gene=POLY] [protein=polyprotein] [protein_id=QDG00695.1] [location
MN018334.1_cds_QDG00696.1_1 [gene=POLY] [protein=polyprotein] [protein_id=QDG00696.1] [location
MN018335.1_cds_QDG00697.1_1 [gene=POLY] [protein=polyprotein] [protein_id=QDG00697.1] [location
MN018336.1_cds_QDG00698.1_1 [gene=POLY] [protein=polyprotein] [protein_id=QDG00698.1] [location
MN577472.1_cds_QGW05344.1_1 [gene=POLY] [protein=polyprotein] [protein_id=QGW05344.1] [location
MH891767.1_cds_QBA57534.1_1 [gene=POLY] [protein=polyprotein] [protein_id=QBA57534.1] [location
MH891771.1_cds_QBA57538.1_1 [gene=POLY] [protein=polyprotein] [protein_id=QBA57538.1] [location
MN444623.1_cds_QEV86478.1_1 [gene=POLY] [protein=polyprotein] [protein_id=QEV86478.1] [location
MN444624.1_cds_QEV86479.1_1 [gene=POLY] [protein=polyprotein] [protein_id=QEV86479.1] [location
MG181997.1_cds_AXK16189.1_1 [protein=polyprotein] [protein_id=AXK16189.1] [location=82..10260]
MK905537.1_cds_QCZ35895.1_1 [gene=POLY] [protein=polyprotein] [protein_id=QCZ35895.1] [location
MG097875.1_cds_AYU75102.1_1 [protein=polyprotein] [protein_id=AYU75102.1] [location=86..10264]
MG097876.1_cds_AYU75103.1_1 [protein=polyprotein] [protein_id=AYU75103.1] [location=95..10273]
KY672931.1_cds_ARO78342.1_1 [protein=polyprotein] [protein_id=ARO78342.1] [location=97..10275]
KY672932.1_cds_ARO78343.1_1 [protein=polyprotein] [protein_id=ARO78343.1] [location=97..10275]
KY672933.1_cds_ARO78344.1_1 [protein=polyprotein] [protein_id=ARO78344.1] [location=97..10275]
KY672934.1_cds_ARO78345.1_1 [protein=polyprotein] [protein_id=ARO78345.1] [location=97..10275]
KY672935.1_cds_ARO78346.1_1 [protein=polyprotein] [protein_id=ARO78346.1] [location=97..10275]
KY672936.1_cds_ARO78347.1_1 [protein=polyprotein] [protein_id=ARO78347.1] [location=97..10275]
KY672937.1_cds_ARO78348.1_1 [protein=polyprotein] [protein_id=ARO78348.1] [location=97..10275]
KY672938.1_cds_ARO78349.1_1 [protein=polyprotein] [protein_id=ARO78349.1] [location=97..10275]
KY672939.1_cds_ARO78350.1_1 [protein=polyprotein] [protein_id=ARO78350.1] [location=97..10275]
KY672940.1_cds_ARO78351.1_1 [protein=polyprotein] [protein_id=ARO78351.1] [location=97..10275]
KY672941.1_cds_ARO78352.1_1 [protein=polyprotein] [protein_id=ARO78352.1] [location=97..10275]
KY672942.1_cds_ARO78353.1_1 [protein=polyprotein] [protein_id=ARO78353.1] [location=97..10275]
KY672943.1_cds_ARO78354.1_1 [protein=polyprotein] [protein_id=ARO78354.1] [location=97..10275]
KY672944.1_cds_ARO78355.1_1 [protein=polyprotein] [protein_id=ARO78355.1] [location=97..10275]
MH823207.1_cds_QBB90021.1_1 [gene=POLY] [protein=polyprotein] [protein_id=QBB90021.1] [location
MG721060.1_cds_AXX75606.1_1 [protein=polyprotein] [protein_id=AXX75606.1] [location=95..10273]
MG721063.1_cds_AXX75607.1_1 [protein=polyprotein] [protein_id=AXX75607.1] [location=95..10237]
MH822958.1_cds_AXX75608.1_1 [protein=polyprotein] [protein_id=AXX75608.1] [location=74..10252]
MH822959.1_cds_AXX75609.1_1 [protein=polyprotein] [protein_id=AXX75609.1] [location=86..10264]
MH921566.1_cds_AYP31256.1_1 [protein=polyprotein] [protein_id=AYP31256.1] [location=95..10273]
MH921567.1_cds_AYP31257.1_1 [protein=polyprotein] [protein_id=AYP31257.1] [location=95..10273]
KY057365.1_cds_ATP66556.1_1 [protein=polyprotein] [protein_id=ATP66556.1] [location=95..10273]
KY057366.1_cds_ATP66557.1_1 [protein=polyprotein] [protein_id=ATP66557.1] [location=95..10273]
KY057367.1_cds_ATP66558.1_1 [protein=polyprotein] [protein_id=ATP66558.1] [location=95..10273]
KY057368.1_cds_ATP66559.1_1 [protein=polyprotein] [protein_id=ATP66559.1] [location=95..10273]
KY057369.1_cds_ATP66560.1_1 [protein=polyprotein] [protein_id=ATP66560.1] [location=95..10273]
KY057370.1_cds_ATP66561.1_1 [protein=polyprotein] [protein_id=ATP66561.1] [location=95..10273]
KY057371.1_cds_ATP66562.1_1 [protein=polyprotein] [protein_id=ATP66562.1] [location=95..10273]
KY057372.1_cds_ATP66563.1_1 [protein=polyprotein] [protein_id=ATP66563.1] [location=95..10273]
KY057373.1_cds_ATP66564.1_1 [protein=polyprotein] [protein_id=ATP66564.1] [location=95..10273]
MG767211.1_cds_AYN74343.1_1 [protein=polyprotein] [protein_id=AYN74343.1] [location=94..10272]
MG877553.1_cds_AXS75988.1_1 [protein=polyprotein] [protein_id=AXS75988.1] [location=96..10274]
MG877554.1_cds_AXS75989.1_1 [protein=polyprotein] [protein_id=AXS75989.1] [location=96..10274]
MG877555.1_cds_AXS75990.1_1 [protein=polyprotein] [protein_id=AXS75990.1] [location=96..10274]
MG877556.1_cds_AXS75991.1_1 [protein=polyprotein] [protein_id=AXS75991.1] [location=95..10273]
MG877557.1_cds_AXS75992.1_1 [protein=polyprotein] [protein_id=AXS75992.1] [location=95..10273]
MF033196.1_cds_AWV55198.1_1 [protein=polyprotein] [protein_id=AWV55198.1] [location=95..10273]
MF033197.1_cds_AWV55199.1_1 [protein=polyprotein] [protein_id=AWV55199.1] [location=95..10273]
MF033198.1_cds_AWV55200.1_1 [protein=polyprotein] [protein_id=AWV55200.1] [location=95..10273]
MF033199.1_cds_AWV55201.1_1 [protein=polyprotein] [protein_id=AWV55201.1] [location=95..10273]
MF033200.1_cds_AWV55202.1_1 [protein=polyprotein] [protein_id=AWV55202.1] [location=95..10273]
MF033201.1_cds_AWV55203.1_1 [protein=polyprotein] [protein_id=AWV55203.1] [location=95..10273]
MF033202.1_cds_AWV55204.1_1 [protein=polyprotein] [protein_id=AWV55204.1] [location=95..10273]
MF033203.1_cds_AWV55205.1_1 [protein=polyprotein] [protein_id=AWV55205.1] [location=95..10273]
MF033204.1_cds_AWV55206.1_1 [protein=polyprotein] [protein_id=AWV55206.1] [location=95..10273]
MF033205.1_cds_AWV55207.1_1 [protein=polyprotein] [protein_id=AWV55207.1] [location=95..10273]
MF033206.1_cds_AWV55208.1_1 [protein=polyprotein] [protein_id=AWV55208.1] [location=95..10273]
MF033207.1_cds_AWV55209.1_1 [protein=polyprotein] [protein_id=AWV55209.1] [location=95..10273]
MF033208.1_cds_AWV55210.1_1 [protein=polyprotein] [protein_id=AWV55210.1] [location=95..10273]
MF033209.1_cds_AWV55211.1_1 [protein=polyprotein] [protein_id=AWV55211.1] [location=95..10273]
MF033210.1_cds_AWV55212.1_1 [protein=polyprotein] [protein_id=AWV55212.1] [location=95..10273]
MF033211.1_cds_AWV55213.1_1 [protein=polyprotein] [protein_id=AWV55213.1] [location=95..10273]
MF033212.1_cds_AWV55214.1_1 [protein=polyprotein] [protein_id=AWV55214.1] [location=95..10273]
MF033213.1_cds_AWV55215.1_1 [protein=polyprotein] [protein_id=AWV55215.1] [location=95..10273]
MF033214.1_cds_AWV55216.1_1 [protein=polyprotein] [protein_id=AWV55216.1] [location=95..10273]
MF033215.1_cds_AWV55217.1_1 [protein=polyprotein] [protein_id=AWV55217.1] [location=95..10273]
MF033216.1_cds_AWV55218.1_1 [protein=polyprotein] [protein_id=AWV55218.1] [location=95..10273]
MF033217.1_cds_AWV55219.1_1 [protein=polyprotein] [protein_id=AWV55219.1] [location=95..10273]
MF033218.1_cds_AWV55220.1_1 [protein=polyprotein] [protein_id=AWV55220.1] [location=95..10273]
MF033219.1_cds_AWV55221.1_1 [protein=polyprotein] [protein_id=AWV55221.1] [location=95..10273]
MF033220.1_cds_AWV55222.1_1 [protein=polyprotein] [protein_id=AWV55222.1] [location=95..10273]
MF033221.1_cds_AWV55223.1_1 [protein=polyprotein] [protein_id=AWV55223.1] [location=95..10273]
MF033222.1_cds_AWV55224.1_1 [protein=polyprotein] [protein_id=AWV55224.1] [location=95..10273]
MF033223.1_cds_AWV55225.1_1 [protein=polyprotein] [protein_id=AWV55225.1] [location=95..10273]
MF033224.1_cds_AWV55226.1_1 [protein=polyprotein] [protein_id=AWV55226.1] [location=95..10273]
MF033225.1_cds_AWV55227.1_1 [protein=polyprotein] [protein_id=AWV55227.1] [location=95..10273]
MF033226.1_cds_AWV55228.1_1 [protein=polyprotein] [protein_id=AWV55228.1] [location=95..10273]
MF033227.1_cds_AWV55229.1_1 [protein=polyprotein] [protein_id=AWV55229.1] [location=95..10273]
MF033228.1_cds_AWV55230.1_1 [protein=polyprotein] [protein_id=AWV55230.1] [location=95..10273]
MF033229.1_cds_AWV55231.1_1 [protein=polyprotein] [protein_id=AWV55231.1] [location=95..10273]
MF033230.1_cds_AWV55232.1_1 [protein=polyprotein] [protein_id=AWV55232.1] [location=95..10273]
MF033231.1_cds_AWV55233.1_1 [protein=polyprotein] [protein_id=AWV55233.1] [location=95..10273]
MF033232.1_cds_AWV55234.1_1 [protein=polyprotein] [protein_id=AWV55234.1] [location=95..10273]
MF033233.1_cds_AWV55235.1_1 [protein=polyprotein] [protein_id=AWV55235.1] [location=95..10273]
MF033234.1_cds_AWV55236.1_1 [protein=polyprotein] [protein_id=AWV55236.1] [location=95..10273]
MF033235.1_cds_AWV55237.1_1 [protein=polyprotein] [protein_id=AWV55237.1] [location=95..10273]
MF033236.1_cds_AWV55238.1_1 [protein=polyprotein] [protein_id=AWV55238.1] [location=95..10273]
MF033237.1_cds_AWV55239.1_1 [protein=polyprotein] [protein_id=AWV55239.1] [location=95..10273]
MF033238.1_cds_AWV55240.1_1 [protein=polyprotein] [protein_id=AWV55240.1] [location=95..10273]
MF033239.1_cds_AWV55241.1_1 [protein=polyprotein] [protein_id=AWV55241.1] [location=95..10273]
MF033240.1_cds_AWV55242.1_1 [protein=polyprotein] [protein_id=AWV55242.1] [location=95..10273]
MF033241.1_cds_AWV55243.1_1 [protein=polyprotein] [protein_id=AWV55243.1] [location=95..10273]
MF033242.1_cds_AWV55244.1_1 [protein=polyprotein] [protein_id=AWV55244.1] [location=95..10273]
MF033243.1_cds_AWV55245.1_1 [protein=polyprotein] [protein_id=AWV55245.1] [location=95..10273]
MF033244.1_cds_AWV55246.1_1 [protein=polyprotein] [protein_id=AWV55246.1] [location=95..10273]
MF033245.1_cds_AWV55247.1_1 [protein=polyprotein] [protein_id=AWV55247.1] [location=95..10273]
MF033246.1_cds_AWV55248.1_1 [protein=polyprotein] [protein_id=AWV55248.1] [location=95..10273]
MF033247.1_cds_AWV55249.1_1 [protein=polyprotein] [protein_id=AWV55249.1] [location=95..10273]
MF033248.1_cds_AWV55250.1_1 [protein=polyprotein] [protein_id=AWV55250.1] [location=95..10273]
MF033249.1_cds_AWV55251.1_1 [protein=polyprotein] [protein_id=AWV55251.1] [location=95..10273]
MF033250.1_cds_AWV55252.1_1 [protein=polyprotein] [protein_id=AWV55252.1] [location=95..10273]
MF033251.1_cds_AWV55253.1_1 [protein=polyprotein] [protein_id=AWV55253.1] [location=95..10273]
MF033252.1_cds_AWV55254.1_1 [protein=polyprotein] [protein_id=AWV55254.1] [location=95..10273]
MF033253.1_cds_AWV55255.1_1 [protein=polyprotein] [protein_id=AWV55255.1] [location=95..10273]
MF033254.1_cds_AWV55256.1_1 [protein=polyprotein] [protein_id=AWV55256.1] [location=95..10273]
MF033255.1_cds_AWV55257.1_1 [protein=polyprotein] [protein_id=AWV55257.1] [location=95..10273]
MF033256.1_cds_AWV55258.1_1 [protein=polyprotein] [protein_id=AWV55258.1] [location=95..10273]
MF033257.1_cds_AWV55259.1_1 [protein=polyprotein] [protein_id=AWV55259.1] [location=95..10273]
MF033258.1_cds_AWV55260.1_1 [protein=polyprotein] [protein_id=AWV55260.1] [location=95..10273]
MF033259.1_cds_AWV55261.1_1 [protein=polyprotein] [protein_id=AWV55261.1] [location=95..10273]
MF033260.1_cds_AWV55262.1_1 [protein=polyprotein] [protein_id=AWV55262.1] [location=95..10273]
MF033261.1_cds_AWV55263.1_1 [protein=polyprotein] [protein_id=AWV55263.1] [location=95..10273]
MG560265.1_cds_AXI98990.1_1 [protein=polyprotein] [protein_id=AXI98990.1] [location=41..10219]
MG560266.1_cds_AXI98991.1_1 [protein=polyprotein] [protein_id=AXI98991.1] [location=20..10198]
MG560267.1_cds_AXI98992.1_1 [protein=polyprotein] [protein_id=AXI98992.1] [location=41..10219]
MG560268.1_cds_AXI98993.1_1 [protein=polyprotein] [protein_id=AXI98993.1] [location=41..10219]
MG560269.1_cds_AXI98994.1_1 [protein=polyprotein] [protein_id=AXI98994.1] [location=41..10219]
MG679800.1_cds_AUW27627.1_1 [protein=polyprotein] [protein_id=AUW27627.1] [location=95..10273]
MG679801.1_cds_AUW27628.1_1 [protein=polyprotein] [protein_id=AUW27628.1] [location=95..10273]
MH450312.1_cds_AXB26603.1_1 [protein=polyprotein] [protein_id=AXB26603.1] [location=96..10274]
KX618705.1_cds_ASD49618.1_1 [protein=polyprotein] [protein_id=ASD49618.1] [location=95..10273]
KX618706.1_cds_ASD49619.1_1 [protein=polyprotein] [protein_id=ASD49619.1] [location=95..10273]
MF314188.1_cds_AWI64265.1_1 [protein=polyprotein] [protein_id=AWI64265.1] [location=86..10264]
KY926848.1_cds_AVM80382.1_1 [protein=polyprotein] [protein_id=AVM80382.1] [location=33..10211]
KY926849.1_cds_AVM80383.1_1 [protein=polyprotein] [protein_id=AVM80383.1] [location=33..10211]
MF681692.1_cds_AUW27525.1_1 [protein=polyprotein] [protein_id=AUW27525.1] [location=95..10273]
MF681693.1_cds_AUW27526.1_1 [protein=polyprotein] [protein_id=AUW27526.1] [location=95..10273]
MF683116.1_cds_AUW27527.1_1 [protein=polyprotein] [protein_id=AUW27527.1] [location=95..10273]
MF683117.1_cds_AUW27528.1_1 [protein=polyprotein] [protein_id=AUW27528.1] [location=95..10273]
KY474303.1_cds_AUN35112.1_1 [protein=polyprotein] [protein_id=AUN35112.1] [location=61..10239]
KY474304.1_cds_AUN35113.1_1 [protein=polyprotein] [protein_id=AUN35113.1] [location=61..10239]
KY474305.1_cds_AUN35114.1_1 [protein=polyprotein] [protein_id=AUN35114.1] [location=60..10238]
KY474306.1_cds_AUN35115.1_1 [protein=polyprotein] [protein_id=AUN35115.1] [location=61..10239]
KY474307.1_cds_AUN35116.1_1 [protein=polyprotein] [protein_id=AUN35116.1] [location=60..10238]
MF797878.1_cds_ATJ00092.1_1 [protein=polyprotein] [protein_id=ATJ00092.1] [location=93..10271]
MF405201.1_cds_ASN77914.1_1 [protein=polyprotein] [protein_id=ASN77914.1] [location=151..10329]
KY829115.1_cds_ARQ80406.1_1 [protein=polyprotein] [protein_id=ARQ80406.1] [location=95..10273]
KX452050.1_cds_ARO84706.1_1 [protein=polyprotein] [protein_id=ARO84706.1] [location=111..10289]
KX452051.1_cds_ARO84707.1_1 [protein=polyprotein] [protein_id=ARO84707.1] [location=141..10319]
KX452052.1_cds_ARO84708.1_1 [protein=polyprotein] [protein_id=ARO84708.1] [location=145..10323]
KX452053.1_cds_ARO84709.1_1 [protein=polyprotein] [protein_id=ARO84709.1] [location=175..10353]
KX452054.1_cds_ARO84710.1_1 [protein=polyprotein] [protein_id=ARO84710.1] [location=231..10409]
KX452055.1_cds_ARO84711.1_1 [protein=polyprotein] [protein_id=ARO84711.1] [location=159..10337]
KX452056.1_cds_ARO84712.1_1 [protein=polyprotein] [protein_id=ARO84712.1] [location=169..10347]
KX452057.1_cds_ARO84713.1_1 [protein=polyprotein] [protein_id=ARO84713.1] [location=159..10337]
KX452058.1_cds_ARO84714.1_1 [protein=polyprotein] [protein_id=ARO84714.1] [location=92..10270]
KX452059.1_cds_ARO84715.1_1 [protein=polyprotein] [protein_id=ARO84715.1] [location=161..10339]
KX452060.1_cds_ARO84716.1_1 [protein=polyprotein] [protein_id=ARO84716.1] [location=36..10214]
KX452061.1_cds_ARO84717.1_1 [protein=polyprotein] [protein_id=ARO84717.1] [location=141..10319]
KX452062.1_cds_ARO84718.1_1 [protein=polyprotein] [protein_id=ARO84718.1] [location=44..10222]
KX452063.1_cds_ARO84719.1_1 [protein=polyprotein] [protein_id=ARO84719.1] [location=123..10301]
KX452064.1_cds_ARO84720.1_1 [protein=polyprotein] [protein_id=ARO84720.1] [location=118..10296]
KX452065.1_cds_ARO84721.1_1 [protein=polyprotein] [protein_id=ARO84721.1] [location=161..10339]
KX452068.1_cds_ARO84722.1_1 [protein=polyprotein] [protein_id=ARO84722.1] [location=121..10299]
KY921902.1_cds_ARM59243.1_1 [protein=polyprotein] [protein_id=ARM59243.1] [location=95..10273]
KY921903.1_cds_ARM59244.1_1 [protein=polyprotein] [protein_id=ARM59244.1] [location=95..10273]
KX459386.1_cds_AQS22529.1_1 [protein=polyprotein] [protein_id=AQS22529.1] [location=92..10270]
KX459387.1_cds_AQS22530.1_1 [protein=polyprotein] [protein_id=AQS22530.1] [location=85..10263]
KX459388.1_cds_AQS22531.1_1 [protein=polyprotein] [protein_id=AQS22531.1] [location=92..10270]
KX459389.1_cds_AQS22532.1_1 [protein=polyprotein] [protein_id=AQS22532.1] [location=82..10260]
KX459390.1_cds_AQS22533.1_1 [protein=polyprotein] [protein_id=AQS22533.1] [location=82..10260]
KX459391.1_cds_AQS22534.1_1 [protein=polyprotein] [protein_id=AQS22534.1] [location=50..10228]
KX459392.1_cds_AQS22535.1_1 [protein=polyprotein] [protein_id=AQS22535.1] [location=86..10264]
KX621249.1_cds_AQS22540.1_1 [protein=polyprotein] [protein_id=AQS22540.1] [location=72..10250]
KX621250.1_cds_AQS22541.1_1 [protein=polyprotein] [protein_id=AQS22541.1] [location=55..10233]
KX621251.1_cds_AQS22542.1_1 [protein=polyprotein] [protein_id=AQS22542.1] [location=26..10204]
KX621252.1_cds_AQS22543.1_1 [protein=polyprotein] [protein_id=AQS22543.1] [location=26..10204]
KX621253.1_cds_AQS22544.1_1 [protein=polyprotein] [protein_id=AQS22544.1] [location=95..10273]
KU509264.1_cds_ANC57590.1_1 [protein=polyprotein] [protein_id=ANC57590.1] [location=28..10206]
KX225483.1_cds_APW49447.1_1 [protein=polyprotein] [protein_id=APW49447.1] [location=75..10253]
KX225484.1_cds_APW49448.1_1 [protein=polyprotein] [protein_id=APW49448.1] [location=85..10263]
KX225487.1_cds_APW49451.1_1 [protein=polyprotein] [protein_id=APW49451.1] [location=46..10224]
KX225488.1_cds_APW49452.1_1 [protein=polyprotein] [protein_id=APW49452.1] [location=86..10264]
KX225489.1_cds_APW49453.1_1 [protein=polyprotein] [protein_id=APW49453.1] [location=82..10260]
KX225490.1_cds_APW49454.1_1 [protein=polyprotein] [protein_id=APW49454.1] [location=82..10260]
KX225491.1_cds_APW49455.1_1 [protein=polyprotein] [protein_id=APW49455.1] [location=85..10263]
KX225492.1_cds_APW49456.1_1 [protein=polyprotein] [protein_id=APW49456.1] [location=84..10262]
KX225493.1_cds_APW49457.1_1 [protein=polyprotein] [protein_id=APW49457.1] [location=85..10263]
KX620451.1_cds_APU93587.1_1 [protein=polyprotein] [protein_id=APU93587.1] [location=85..10263]
KX620452.1_cds_APU93588.1_1 [protein=polyprotein] [protein_id=APU93588.1] [location=92..10270]
KX620453.1_cds_APU93589.1_1 [protein=polyprotein] [protein_id=APU93589.1] [location=93..10271]
KX620454.1_cds_APU93590.1_1 [protein=polyprotein] [protein_id=APU93590.1] [location=79..10257]
KX620455.1_cds_APU93591.1_1 [protein=polyprotein] [protein_id=APU93591.1] [location=92..10270]
KP188539.1_cds_AKQ00010.1_1 [protein=polyprotein] [protein_id=AKQ00010.1] [location=62..10240]
KP188540.1_cds_AKQ00011.1_1 [protein=polyprotein] [protein_id=AKQ00011.1] [location=186..10364]
KP188541.1_cds_AKQ00012.1_1 [protein=polyprotein] [protein_id=AKQ00012.1] [location=157..10335]
KP188542.1_cds_AKQ00013.1_1 [protein=polyprotein] [protein_id=AKQ00013.1] [location=132..10310]
KP188543.1_cds_AKQ00014.1_1 [protein=polyprotein] [protein_id=AKQ00014.1] [location=202..10380]
KP188544.1_cds_AKQ00015.1_1 [protein=polyprotein] [protein_id=AKQ00015.1] [location=225..10403]
KP188545.1_cds_AKQ00016.1_1 [protein=polyprotein] [protein_id=AKQ00016.1] [location=113..10291]
KP188546.1_cds_AKQ00017.1_1 [protein=polyprotein] [protein_id=AKQ00017.1] [location=152..10330]
KP188547.1_cds_AKQ00018.1_1 [protein=polyprotein] [protein_id=AKQ00018.1] [location=183..10361]
KP188548.1_cds_AKQ00019.1_1 [protein=polyprotein] [protein_id=AKQ00019.1] [location=143..10321]
KP188567.1_cds_AKQ00038.1_1 [protein=polyprotein] [protein_id=AKQ00038.1] [location=110..10288]
KP188568.1_cds_AKQ00039.1_1 [protein=polyprotein] [protein_id=AKQ00039.1] [location=108..10286]
KX380806.1_cds_ANS59165.1_1 [protein=polyprotein] [protein_id=ANS59165.1] [location=95..10273]
KX458014.1_cds_ANQ38587.1_1 [protein=polyprotein] [protein_id=ANQ38587.1] [location=95..10273]
KJ755855.1_cds_AJP08954.1_1 [protein=polyprotein] [protein_id=AJP08954.1] [location=93..10271]
KM403575.1_cds_AKL81129.1_1 [protein=polyprotein] [protein_id=AKL81129.1] [location=95..10273]
KM403576.1_cds_AKL81130.1_1 [protein=polyprotein] [protein_id=AKL81130.1] [location=95..10273]
KM403577.1_cds_AKL81131.1_1 [protein=polyprotein] [protein_id=AKL81131.1] [location=95..10273]
KM403578.1_cds_AKL81132.1_1 [protein=polyprotein] [protein_id=AKL81132.1] [location=95..10273]
KM403579.1_cds_AKL81133.1_1 [protein=polyprotein] [protein_id=AKL81133.1] [location=95..10273]
KM403580.1_cds_AKL81134.1_1 [protein=polyprotein] [protein_id=AKL81134.1] [location=95..10273]
KM403581.1_cds_AKL81135.1_1 [protein=polyprotein] [protein_id=AKL81135.1] [location=95..10273]
KM403582.1_cds_AKL81136.1_1 [protein=polyprotein] [protein_id=AKL81136.1] [location=95..10273]
KM403583.1_cds_AKL81137.1_1 [protein=polyprotein] [protein_id=AKL81137.1] [location=95..10273]
KM403584.1_cds_AKL81138.1_1 [protein=polyprotein] [protein_id=AKL81138.1] [location=95..10273]
KM403585.1_cds_AKL81139.1_1 [protein=polyprotein] [protein_id=AKL81139.1] [location=95..10273]
KM403586.1_cds_AKL81140.1_1 [protein=polyprotein] [protein_id=AKL81140.1] [location=95..10273]
KM403587.1_cds_AKL81141.1_1 [protein=polyprotein] [protein_id=AKL81141.1] [location=95..10273]
KM403588.1_cds_AKL81142.1_1 [protein=polyprotein] [protein_id=AKL81142.1] [location=95..10273]
KM403589.1_cds_AKL81143.1_1 [protein=polyprotein] [protein_id=AKL81143.1] [location=95..10273]
KM403590.1_cds_AKL81144.1_1 [protein=polyprotein] [protein_id=AKL81144.1] [location=95..10273]
KM403591.1_cds_AKL81145.1_1 [protein=polyprotein] [protein_id=AKL81145.1] [location=95..10273]
KM403592.1_cds_AKL81146.1_1 [protein=polyprotein] [protein_id=AKL81146.1] [location=95..10273]
KM403593.1_cds_AKL81147.1_1 [protein=polyprotein] [protein_id=AKL81147.1] [location=95..10273]
KM403594.1_cds_AKL81148.1_1 [protein=polyprotein] [protein_id=AKL81148.1] [location=95..10273]
KM403595.1_cds_AKL81149.1_1 [protein=polyprotein] [protein_id=AKL81149.1] [location=95..10273]
KM403596.1_cds_AKL81150.1_1 [protein=polyprotein] [protein_id=AKL81150.1] [location=95..10273]
KM403597.1_cds_AKL81151.1_1 [protein=polyprotein] [protein_id=AKL81151.1] [location=95..10273]
KM403598.1_cds_AKL81152.1_1 [protein=polyprotein] [protein_id=AKL81152.1] [location=95..10273]
KM403599.1_cds_AKL81153.1_1 [protein=polyprotein] [protein_id=AKL81153.1] [location=95..10273]
KM403600.1_cds_AKL81154.1_1 [protein=polyprotein] [protein_id=AKL81154.1] [location=80..10258]
KM403601.1_cds_AKL81155.1_1 [protein=polyprotein] [protein_id=AKL81155.1] [location=95..10273]
KM403602.1_cds_AKL81156.1_1 [protein=polyprotein] [protein_id=AKL81156.1] [location=95..10273]
KM403603.1_cds_AKL81157.1_1 [protein=polyprotein] [protein_id=AKL81157.1] [location=95..10273]
KM403604.1_cds_AKL81158.1_1 [protein=polyprotein] [protein_id=AKL81158.1] [location=95..10273]
KM403605.1_cds_AKL81159.1_1 [protein=polyprotein] [protein_id=AKL81159.1] [location=95..10273]
KM403606.1_cds_AKL81160.1_1 [protein=polyprotein] [protein_id=AKL81160.1] [location=95..10273]
KM403607.1_cds_AKL81161.1_1 [protein=polyprotein] [protein_id=AKL81161.1] [location=95..10273]
KM403608.1_cds_AKL81162.1_1 [protein=polyprotein] [protein_id=AKL81162.1] [location=95..10273]
KM403609.1_cds_AKL81163.1_1 [protein=polyprotein] [protein_id=AKL81163.1] [location=95..10273]
KM403610.1_cds_AKL81164.1_1 [protein=polyprotein] [protein_id=AKL81164.1] [location=95..10273]
KM403611.1_cds_AKL81165.1_1 [protein=polyprotein] [protein_id=AKL81165.1] [location=95..10273]
KM403612.1_cds_AKL81166.1_1 [protein=polyprotein] [protein_id=AKL81166.1] [location=95..10273]
KM403613.1_cds_AKL81167.1_1 [protein=polyprotein] [protein_id=AKL81167.1] [location=95..10273]
KM403614.1_cds_AKL81168.1_1 [protein=polyprotein] [protein_id=AKL81168.1] [location=95..10273]
KM403615.1_cds_AKL81169.1_1 [protein=polyprotein] [protein_id=AKL81169.1] [location=95..10273]
KM403616.1_cds_AKL81170.1_1 [protein=polyprotein] [protein_id=AKL81170.1] [location=95..10273]
KM403617.1_cds_AKL81171.1_1 [protein=polyprotein] [protein_id=AKL81171.1] [location=95..10273]
KM403618.1_cds_AKL81172.1_1 [protein=polyprotein] [protein_id=AKL81172.1] [location=95..10273]
KM403619.1_cds_AKL81173.1_1 [protein=polyprotein] [protein_id=AKL81173.1] [location=95..10273]
KM403620.1_cds_AKL81174.1_1 [protein=polyprotein] [protein_id=AKL81174.1] [location=79..10257]
KM403621.1_cds_AKL81175.1_1 [protein=polyprotein] [protein_id=AKL81175.1] [location=95..10273]
KM403622.1_cds_AKL81176.1_1 [protein=polyprotein] [protein_id=AKL81176.1] [location=95..10273]
KM403623.1_cds_AKL81177.1_1 [protein=polyprotein] [protein_id=AKL81177.1] [location=95..10273]
KM403624.1_cds_AKL81178.1_1 [protein=polyprotein] [protein_id=AKL81178.1] [location=95..10273]
KM403625.1_cds_AKL81179.1_1 [protein=polyprotein] [protein_id=AKL81179.1] [location=95..10273]
KM403626.1_cds_AKL81180.1_1 [protein=polyprotein] [protein_id=AKL81180.1] [location=95..10273]
KM403627.1_cds_AKL81181.1_1 [protein=polyprotein] [protein_id=AKL81181.1] [location=95..10273]
KM403628.1_cds_AKL81182.1_1 [protein=polyprotein] [protein_id=AKL81182.1] [location=95..10273]
KM403629.1_cds_AKL81183.1_1 [protein=polyprotein] [protein_id=AKL81183.1] [location=95..10273]
KM403630.1_cds_AKL81184.1_1 [protein=polyprotein] [protein_id=AKL81184.1] [location=95..10273]
KM403631.1_cds_AKL81185.1_1 [protein=polyprotein] [protein_id=AKL81185.1] [location=95..10273]
KM403632.1_cds_AKL81186.1_1 [protein=polyprotein] [protein_id=AKL81186.1] [location=95..10273]
KM403633.1_cds_AKL81187.1_1 [protein=polyprotein] [protein_id=AKL81187.1] [location=95..10273]
KM403634.1_cds_AKL81188.1_1 [protein=polyprotein] [protein_id=AKL81188.1] [location=95..10273]
KM403635.1_cds_AKL81189.1_1 [protein=polyprotein] [protein_id=AKL81189.1] [location=95..10273]
KM403636.1_cds_AKL81190.1_1 [protein=polyprotein] [protein_id=AKL81190.1] [location=95..10273]
KR024705.1_cds_AMK05843.1_1 [protein=polyprotein] [protein_id=AMK05843.1] [location=95..10273]
KR024706.1_cds_AMK05844.1_1 [protein=polyprotein] [protein_id=AMK05844.1] [location=95..10273]
KR024707.1_cds_AMK05845.1_1 [protein=polyprotein] [protein_id=AMK05845.1] [location=95..10273]
KR024708.1_cds_AMK05846.1_1 [protein=polyprotein] [protein_id=AMK05846.1] [location=95..10273]
KT187559.1_cds_ALP06116.1_1 [protein=polyprotein] [protein_id=ALP06116.1] [location=95..10273]
KT187560.1_cds_ALP06117.1_1 [protein=polyprotein] [protein_id=ALP06117.1] [location=95..10273]
KT187561.1_cds_ALP06118.1_1 [protein=polyprotein] [protein_id=ALP06118.1] [location=95..10273]
KT187562.1_cds_ALP06119.1_1 [protein=polyprotein] [protein_id=ALP06119.1] [location=95..10273]
KT187563.1_cds_ALP06120.1_1 [protein=polyprotein] [protein_id=ALP06120.1] [location=95..10273]
KT187564.1_cds_ALP06121.1_1 [protein=polyprotein] [protein_id=ALP06121.1] [location=95..10273]
KT279761.2_cds_ALJ53459.1_1 [protein=polyprotein] [protein_id=ALJ53459.1] [location=95..10273]
KP406801.1_cds_ALI16133.1_1 [protein=polyprotein] [protein_id=ALI16133.1] [location=95..10273]
KP406802.1_cds_ALI16134.1_1 [protein=polyprotein] [protein_id=ALI16134.1] [location=95..10273]
KP406803.1_cds_ALI16135.1_1 [protein=polyprotein] [protein_id=ALI16135.1] [location=95..10273]
KF289073.1_cds_AHX34897.1_1 [protein=polyprotein] [protein_id=AHX34897.1] [location=95..10273]
KP723473.1_cds_AKQ62912.1_1 [protein=polyprotein] [protein_id=AKQ62912.1] [location=64..10242]
KP723476.1_cds_AKQ62913.1_1 [protein=polyprotein] [protein_id=AKQ62913.1] [location=41..10219]
KP686070.1_cds_AKN52396.1_1 [protein=polyprotein] [protein_id=AKN52396.1] [location=96..10274]
KP398852.1_cds_AKC32653.1_1 [protein=polyprotein] [protein_id=AKC32653.1] [location=95..10273]
KC762620.1_cds_AHG06304.1_1 [protein=polyprotein] [protein_id=AHG06304.1] [location=95..10273]
KC762621.1_cds_AHG06305.1_1 [protein=polyprotein] [protein_id=AHG06305.1] [location=95..10273]
KC762622.1_cds_AHG06306.1_1 [protein=polyprotein] [protein_id=AHG06306.1] [location=95..10273]
KC762623.1_cds_AHG06307.1_1 [protein=polyprotein] [protein_id=AHG06307.1] [location=95..10273]
KC762624.1_cds_AHG06308.1_1 [protein=polyprotein] [protein_id=AHG06308.1] [location=95..10273]
KC762625.1_cds_AHG06309.1_1 [protein=polyprotein] [protein_id=AHG06309.1] [location=95..10273]
KC762626.1_cds_AHG06310.1_1 [protein=polyprotein] [protein_id=AHG06310.1] [location=95..10273]
KC762627.1_cds_AHG06311.1_1 [protein=polyprotein] [protein_id=AHG06311.1] [location=95..10273]
KC762628.1_cds_AHG06312.1_1 [protein=polyprotein] [protein_id=AHG06312.1] [location=95..10273]
KC762629.1_cds_AHG06313.1_1 [protein=polyprotein] [protein_id=AHG06313.1] [location=95..10273]
KC762630.1_cds_AHG06314.1_1 [protein=polyprotein] [protein_id=AHG06314.1] [location=95..10273]
KC762631.1_cds_AHG06315.1_1 [protein=polyprotein] [protein_id=AHG06315.1] [location=95..10273]
KC762632.1_cds_AHG06316.1_1 [protein=polyprotein] [protein_id=AHG06316.1] [location=95..10273]
KC762633.1_cds_AHG06317.1_1 [protein=polyprotein] [protein_id=AHG06317.1] [location=95..10273]
KC762634.1_cds_AHG06318.1_1 [protein=polyprotein] [protein_id=AHG06318.1] [location=95..10273]
KC762635.1_cds_AHG06319.1_1 [protein=polyprotein] [protein_id=AHG06319.1] [location=95..10273]
KC762636.1_cds_AHG06320.1_1 [protein=polyprotein] [protein_id=AHG06320.1] [location=95..10273]
KC762637.1_cds_AHG06321.1_1 [protein=polyprotein] [protein_id=AHG06321.1] [location=95..10273]
KC762638.1_cds_AHG06322.1_1 [protein=polyprotein] [protein_id=AHG06322.1] [location=95..10273]
KC762639.1_cds_AHG06323.1_1 [protein=polyprotein] [protein_id=AHG06323.1] [location=95..10273]
KC762640.1_cds_AHG06324.1_1 [protein=polyprotein] [protein_id=AHG06324.1] [location=95..10273]
KC762641.1_cds_AHG06325.1_1 [protein=polyprotein] [protein_id=AHG06325.1] [location=95..10273]
KC762642.1_cds_AHG06326.1_1 [protein=polyprotein] [protein_id=AHG06326.1] [location=95..10273]
KC762643.1_cds_AHG06327.1_1 [protein=polyprotein] [protein_id=AHG06327.1] [location=95..10273]
KC762644.1_cds_AHG06328.1_1 [protein=polyprotein] [protein_id=AHG06328.1] [location=95..10273]
KC762645.1_cds_AHG06329.1_1 [protein=polyprotein] [protein_id=AHG06329.1] [location=95..10273]
KC762646.1_cds_AHG06330.1_1 [protein=polyprotein] [protein_id=AHG06330.1] [location=95..10273]
KC762647.1_cds_AHG06331.1_1 [protein=polyprotein] [protein_id=AHG06331.1] [location=95..10273]
KC762648.1_cds_AHG06332.1_1 [protein=polyprotein] [protein_id=AHG06332.1] [location=95..10273]
KC762649.1_cds_AHG06333.1_1 [protein=polyprotein] [protein_id=AHG06333.1] [location=95..10273]
KC762650.1_cds_AHG06334.1_1 [protein=polyprotein] [protein_id=AHG06334.1] [location=95..10273]
KC762651.1_cds_AHG06335.1_1 [protein=polyprotein] [protein_id=AHG06335.1] [location=95..10273]
KC762652.1_cds_AHG06336.1_1 [protein=polyprotein] [protein_id=AHG06336.1] [location=95..10273]
KC762653.1_cds_AHG06337.1_1 [protein=polyprotein] [protein_id=AHG06337.1] [location=95..10273]
KC762654.1_cds_AHG06338.1_1 [protein=polyprotein] [protein_id=AHG06338.1] [location=95..10273]
KJ649286.1_cds_AIG59667.1_1 [protein=polyprotein] [protein_id=AIG59667.1] [location=95..10273]
LC016760.1_cds_BAQ08293.1_1 [protein=polyprotein] [protein_id=BAQ08293.1] [location=74..10252]
KF973453.1_cds_AHC98424.1_1 [protein=polyprotein] [protein_id=AHC98424.1] [location=95..10273]
KF973454.1_cds_AHC98425.1_1 [protein=polyprotein] [protein_id=AHC98425.1] [location=95..10273]
KF973455.1_cds_AHC98426.1_1 [protein=polyprotein] [protein_id=AHC98426.1] [location=95..10273]
KF973456.1_cds_AHC98427.1_1 [protein=polyprotein] [protein_id=AHC98427.1] [location=95..10273]
KF973457.1_cds_AHC98428.1_1 [protein=polyprotein] [protein_id=AHC98428.1] [location=95..10273]
KF973458.1_cds_AHC98429.1_1 [protein=polyprotein] [protein_id=AHC98429.1] [location=62..10240]
KF973459.1_cds_AHC98430.1_1 [protein=polyprotein] [protein_id=AHC98430.1] [location=25..10203]
KF973460.1_cds_AHC98431.1_1 [protein=polyprotein] [protein_id=AHC98431.1] [location=95..10273]
KF973461.1_cds_AHC98432.1_1 [protein=polyprotein] [protein_id=AHC98432.1] [location=95..10273]
KF973462.1_cds_AHC98433.1_1 [protein=polyprotein] [protein_id=AHC98433.1] [location=95..10273]
KF973463.1_cds_AHC98434.1_1 [protein=polyprotein] [protein_id=AHC98434.1] [location=95..10273]
KF973464.1_cds_AHC98435.1_1 [protein=polyprotein] [protein_id=AHC98435.1] [location=25..10203]
KF973465.1_cds_AHC98436.1_1 [protein=polyprotein] [protein_id=AHC98436.1] [location=25..10203]
KF973466.1_cds_AHC98437.1_1 [protein=polyprotein] [protein_id=AHC98437.1] [location=95..10273]
KF973467.1_cds_AHC98438.1_1 [protein=polyprotein] [protein_id=AHC98438.1] [location=14..10192]
KF973468.1_cds_AHC98439.1_1 [protein=polyprotein] [protein_id=AHC98439.1] [location=95..10273]
KF973469.1_cds_AHC98440.1_1 [protein=polyprotein] [protein_id=AHC98440.1] [location=95..10273]
KF973470.1_cds_AHC98441.1_1 [protein=polyprotein] [protein_id=AHC98441.1] [location=95..10273]
KF973471.1_cds_AHC98442.1_1 [protein=polyprotein] [protein_id=AHC98442.1] [location=100..10278]
KF973472.1_cds_AHC98443.1_1 [protein=polyprotein] [protein_id=AHC98443.1] [location=95..10273]
KF973473.1_cds_AHC98444.1_1 [protein=polyprotein] [protein_id=AHC98444.1] [location=95..10273]
KF973474.1_cds_AHC98445.1_1 [protein=polyprotein] [protein_id=AHC98445.1] [location=95..10273]
KF973475.1_cds_AHC98446.1_1 [protein=polyprotein] [protein_id=AHC98446.1] [location=95..10273]
LC011945.1_cds_BAP91043.1_1 [protein=polyprotein] [protein_id=BAP91043.1] [location=74..10252]
LC011946.1_cds_BAP91044.1_1 [protein=polyprotein] [protein_id=BAP91044.1] [location=74..10252]
LC011947.1_cds_BAP91045.1_1 [protein=polyprotein] [protein_id=BAP91045.1] [location=74..10252]
LC011948.1_cds_BAP91046.1_1 [protein=polyprotein] [protein_id=BAP91046.1] [location=74..10252]
LC011949.1_cds_BAP91047.1_1 [protein=polyprotein] [protein_id=BAP91047.1] [location=74..10252]
KM204119.1_cds_AIU47321.1_1 [protein=polyprotein] [protein_id=AIU47321.1] [location=96..10274]
KJ468234.1_cds_AIN75463.1_1 [protein=polyprotein] [protein_id=AIN75463.1] [location=74..10252]
KC692495.1_cds_AHF50470.1_1 [protein=polyprotein] [protein_id=AHF50470.1] [location=95..10273]
KC692496.1_cds_AHF50471.1_1 [protein=polyprotein] [protein_id=AHF50471.1] [location=95..10273]
KC692497.1_cds_AHF50472.1_1 [protein=polyprotein] [protein_id=AHF50472.1] [location=95..10273]
KC692498.1_cds_AHF50473.1_1 [protein=polyprotein] [protein_id=AHF50473.1] [location=95..10273]
KC692499.1_cds_AHF50474.1_1 [protein=polyprotein] [protein_id=AHF50474.1] [location=95..10273]
KC692500.1_cds_AHF50475.1_1 [protein=polyprotein] [protein_id=AHF50475.1] [location=95..10273]
KC692501.1_cds_AHF50476.1_1 [protein=polyprotein] [protein_id=AHF50476.1] [location=95..10273]
KC692502.1_cds_AHF50477.1_1 [protein=polyprotein] [protein_id=AHF50477.1] [location=95..10273]
KC692503.1_cds_AHF50478.1_1 [protein=polyprotein] [protein_id=AHF50478.1] [location=95..10273]
KC692504.1_cds_AHF50479.1_1 [protein=polyprotein] [protein_id=AHF50479.1] [location=95..10273]
KC692505.1_cds_AHF50480.1_1 [protein=polyprotein] [protein_id=AHF50480.1] [location=95..10273]
KC692506.1_cds_AHF50481.1_1 [protein=polyprotein] [protein_id=AHF50481.1] [location=95..10273]
KC692507.1_cds_AHF50482.1_1 [protein=polyprotein] [protein_id=AHF50482.1] [location=95..10273]
KC692508.1_cds_AHF50483.1_1 [protein=polyprotein] [protein_id=AHF50483.1] [location=95..10273]
KC692509.1_cds_AHF50484.1_1 [protein=polyprotein] [protein_id=AHF50484.1] [location=95..10273]
KC692510.1_cds_AHF50485.1_1 [protein=polyprotein] [protein_id=AHF50485.1] [location=95..10273]
KC692511.1_cds_AHF50486.1_1 [protein=polyprotein] [protein_id=AHF50486.1] [location=95..10273]
KC692512.1_cds_AHF50487.1_1 [protein=polyprotein] [protein_id=AHF50487.1] [location=95..10273]
KC692513.1_cds_AHF50488.1_1 [protein=polyprotein] [protein_id=AHF50488.1] [location=95..10273]
KC692514.1_cds_AHF50489.1_1 [protein=polyprotein] [protein_id=AHF50489.1] [location=95..10273]
KC692515.1_cds_AHF50490.1_1 [protein=polyprotein] [protein_id=AHF50490.1] [location=95..10273]
KC692516.1_cds_AHF50491.1_1 [protein=polyprotein] [protein_id=AHF50491.1] [location=95..10273]
KC692517.1_cds_AHF50492.1_1 [protein=polyprotein] [protein_id=AHF50492.1] [location=95..10273]
JQ917404.1_cds_AFZ40224.1_1 [protein=polyprotein] [protein_id=AFZ40224.1] [location=95..10273]
KF289072.1_cds_AHZ44537.1_1 [protein=polyprotein] [protein_id=AHZ44537.1] [location=95..10273]
KJ438293.1_cds_AHX42641.1_1 [protein=polyprotein] [protein_id=AHX42641.1] [location=95..10273]
KJ438296.1_cds_AHX42644.1_1 [protein=polyprotein] [protein_id=AHX42644.1] [location=95..10273]
KF971869.1_cds_AHL19964.1_1 [protein=polyprotein] [protein_id=AHL19964.1] [location=66..10244]
KF971870.1_cds_AHL19965.1_1 [protein=polyprotein] [protein_id=AHL19965.1] [location=66..10244]
KF971871.1_cds_AHL19966.1_1 [protein=polyprotein] [protein_id=AHL19966.1] [location=66..10244]
JQ692085.1_cds_AFZ40223.1_1 [protein=polyprotein] [protein_id=AFZ40223.1] [location=95..10273]
KJ189302.1_cds_AHI43685.1_1 [protein=polyprotein] [protein_id=AHI43685.1] [location=80..10258]
KJ189303.1_cds_AHI43686.1_1 [protein=polyprotein] [protein_id=AHI43686.1] [location=80..10258]
KJ189304.1_cds_AHI43687.1_1 [protein=polyprotein] [protein_id=AHI43687.1] [location=82..10260]
KJ189306.1_cds_AHI43689.1_1 [protein=polyprotein] [protein_id=AHI43689.1] [location=80..10258]
KJ189307.1_cds_AHI43690.1_1 [protein=polyprotein] [protein_id=AHI43690.1] [location=80..10258]
KJ189317.1_cds_AHI43700.1_1 [protein=polyprotein] [protein_id=AHI43700.1] [location=80..10258]
KJ189318.1_cds_AHI43701.1_1 [protein=polyprotein] [protein_id=AHI43701.1] [location=80..10258]
KJ189319.1_cds_AHI43702.1_1 [protein=polyprotein] [protein_id=AHI43702.1] [location=80..10258]
KJ189320.1_cds_AHI43703.1_1 [protein=polyprotein] [protein_id=AHI43703.1] [location=80..10258]
KJ189321.1_cds_AHI43704.1_1 [protein=polyprotein] [protein_id=AHI43704.1] [location=80..10258]
KJ189322.1_cds_AHI43705.1_1 [protein=polyprotein] [protein_id=AHI43705.1] [location=80..10258]
KJ189323.1_cds_AHI43706.1_1 [protein=polyprotein] [protein_id=AHI43706.1] [location=80..10258]
KJ189324.1_cds_AHI43707.1_1 [protein=polyprotein] [protein_id=AHI43707.1] [location=80..10258]
KJ189325.1_cds_AHI43708.1_1 [protein=polyprotein] [protein_id=AHI43708.1] [location=80..10258]
KJ189326.1_cds_AHI43709.1_1 [protein=polyprotein] [protein_id=AHI43709.1] [location=80..10258]
KJ189327.1_cds_AHI43710.1_1 [protein=polyprotein] [protein_id=AHI43710.1] [location=80..10258]
KJ189328.1_cds_AHI43711.1_1 [protein=polyprotein] [protein_id=AHI43711.1] [location=80..10258]
KJ189329.1_cds_AHI43712.1_1 [protein=polyprotein] [protein_id=AHI43712.1] [location=80..10258]
KJ189330.1_cds_AHI43713.1_1 [protein=polyprotein] [protein_id=AHI43713.1] [location=80..10258]
KJ189331.1_cds_AHI43714.1_1 [protein=polyprotein] [protein_id=AHI43714.1] [location=80..10258]
KJ189332.1_cds_AHI43715.1_1 [protein=polyprotein] [protein_id=AHI43715.1] [location=80..10258]
KJ189333.1_cds_AHI43716.1_1 [protein=polyprotein] [protein_id=AHI43716.1] [location=80..10258]
KJ189334.1_cds_AHI43717.1_1 [protein=polyprotein] [protein_id=AHI43717.1] [location=80..10258]
KJ189335.1_cds_AHI43718.1_1 [protein=polyprotein] [protein_id=AHI43718.1] [location=80..10258]
KJ189336.1_cds_AHI43719.1_1 [protein=polyprotein] [protein_id=AHI43719.1] [location=80..10258]
KJ189337.1_cds_AHI43720.1_1 [protein=polyprotein] [protein_id=AHI43720.1] [location=80..10258]
KJ189338.1_cds_AHI43721.1_1 [protein=polyprotein] [protein_id=AHI43721.1] [location=84..10262]
KJ189339.1_cds_AHI43722.1_1 [protein=polyprotein] [protein_id=AHI43722.1] [location=81..10259]
KJ189340.1_cds_AHI43723.1_1 [protein=polyprotein] [protein_id=AHI43723.1] [location=80..10258]
KJ189341.1_cds_AHI43724.1_1 [protein=polyprotein] [protein_id=AHI43724.1] [location=81..10259]
KJ189342.1_cds_AHI43725.1_1 [protein=polyprotein] [protein_id=AHI43725.1] [location=80..10258]
KJ189343.1_cds_AHI43726.1_1 [protein=polyprotein] [protein_id=AHI43726.1] [location=80..10258]
KJ189344.1_cds_AHI43727.1_1 [protein=polyprotein] [protein_id=AHI43727.1] [location=80..10258]
KJ189345.1_cds_AHI43728.1_1 [protein=polyprotein] [protein_id=AHI43728.1] [location=80..10258]
KJ189346.1_cds_AHI43729.1_1 [protein=polyprotein] [protein_id=AHI43729.1] [location=80..10258]
KJ189347.1_cds_AHI43730.1_1 [protein=polyprotein] [protein_id=AHI43730.1] [location=80..10258]
KJ189348.1_cds_AHI43731.1_1 [protein=polyprotein] [protein_id=AHI43731.1] [location=80..10258]
KJ189349.1_cds_AHI43732.1_1 [protein=polyprotein] [protein_id=AHI43732.1] [location=20..10198]
KJ189350.1_cds_AHI43733.1_1 [protein=polyprotein] [protein_id=AHI43733.1] [location=81..10259]
KJ189351.1_cds_AHI43734.1_1 [protein=polyprotein] [protein_id=AHI43734.1] [location=80..10258]
KJ189352.1_cds_AHI43735.1_1 [protein=polyprotein] [protein_id=AHI43735.1] [location=80..10258]
KJ189353.1_cds_AHI43736.1_1 [protein=polyprotein] [protein_id=AHI43736.1] [location=80..10258]
KJ189354.1_cds_AHI43737.1_1 [protein=polyprotein] [protein_id=AHI43737.1] [location=80..10258]
KJ189355.1_cds_AHI43738.1_1 [protein=polyprotein] [protein_id=AHI43738.1] [location=80..10258]
KJ189356.1_cds_AHI43739.1_1 [protein=polyprotein] [protein_id=AHI43739.1] [location=80..10258]
KJ189357.1_cds_AHI43740.1_1 [protein=polyprotein] [protein_id=AHI43740.1] [location=80..10258]
KJ189358.1_cds_AHI43741.1_1 [protein=polyprotein] [protein_id=AHI43741.1] [location=80..10258]
KJ189359.1_cds_AHI43742.1_1 [protein=polyprotein] [protein_id=AHI43742.1] [location=80..10258]
KJ189360.1_cds_AHI43743.1_1 [protein=polyprotein] [protein_id=AHI43743.1] [location=80..10258]
KJ189361.1_cds_AHI43744.1_1 [protein=polyprotein] [protein_id=AHI43744.1] [location=87..10265]
KJ189362.1_cds_AHI43745.1_1 [protein=polyprotein] [protein_id=AHI43745.1] [location=91..10269]
KJ189363.1_cds_AHI43746.1_1 [protein=polyprotein] [protein_id=AHI43746.1] [location=94..10272]
KJ189364.1_cds_AHI43747.1_1 [protein=polyprotein] [protein_id=AHI43747.1] [location=80..10258]
KJ189365.1_cds_AHI43748.1_1 [protein=polyprotein] [protein_id=AHI43748.1] [location=79..10257]
KJ189366.1_cds_AHI43749.1_1 [protein=polyprotein] [protein_id=AHI43749.1] [location=89..10267]
KJ189367.1_cds_AHI43750.1_1 [protein=polyprotein] [protein_id=AHI43750.1] [location=84..10262]
KJ189368.1_cds_AHI43751.1_1 [protein=polyprotein] [protein_id=AHI43751.1] [location=88..10266]
KJ189369.1_cds_AHI43752.1_1 [protein=polyprotein] [protein_id=AHI43752.1] [location=92..10270]
KF955427.1_cds_AHG23193.1_1 [protein=polyprotein] [protein_id=AHG23193.1] [location=69..10247]
KF955442.1_cds_AHG23208.1_1 [protein=polyprotein] [protein_id=AHG23208.1] [location=17..10195]
KF955443.1_cds_AHG23209.1_1 [protein=polyprotein] [protein_id=AHG23209.1] [location=75..10253]
KF955444.1_cds_AHG23210.1_1 [protein=polyprotein] [protein_id=AHG23210.1] [location=62..10240]
KF955446.1_cds_AHG23212.1_1 [protein=polyprotein] [protein_id=AHG23212.1] [location=59..10237]
KF921911.1_cds_AHF45684.1_1 [protein=polyprotein] [protein_id=AHF45684.1] [location=27..10205]
KF921933.1_cds_AHF45706.1_1 [protein=polyprotein] [protein_id=AHF45706.1] [location=79..10257]
KF921934.1_cds_AHF45707.1_1 [protein=polyprotein] [protein_id=AHF45707.1] [location=79..10257]
KF921935.1_cds_AHF45708.1_1 [protein=polyprotein] [protein_id=AHF45708.1] [location=79..10257]
KF921942.1_cds_AHF45715.1_1 [protein=polyprotein] [protein_id=AHF45715.1] [location=10..10188]
KF921949.1_cds_AHF45722.1_1 [protein=polyprotein] [protein_id=AHF45722.1] [location=77..10255]
JX669461.1_cds_AGN94865.1_1 [protein=polyprotein] [protein_id=AGN94865.1] [location=95..10273]
JX669462.1_cds_AGN94866.1_1 [protein=polyprotein] [protein_id=AGN94866.1] [location=95..10273]
JX669463.1_cds_AGN94867.1_1 [protein=polyprotein] [protein_id=AGN94867.1] [location=95..10273]
JX669464.1_cds_AGN94868.1_1 [protein=polyprotein] [protein_id=AGN94868.1] [location=95..10273]
JX669465.1_cds_AGN94869.1_1 [protein=polyprotein] [protein_id=AGN94869.1] [location=95..10273]
JX669466.1_cds_AGN94870.1_1 [protein=polyprotein] [protein_id=AGN94870.1] [location=95..10273]
JX669467.1_cds_AGN94871.1_1 [protein=polyprotein] [protein_id=AGN94871.1] [location=95..10273]
JX669468.1_cds_AGN94872.1_1 [protein=polyprotein] [protein_id=AGN94872.1] [location=95..10273]
JX669469.1_cds_AGN94873.1_1 [protein=polyprotein] [protein_id=AGN94873.1] [location=95..10273]
JX669470.1_cds_AGN94874.1_1 [protein=polyprotein] [protein_id=AGN94874.1] [location=95..10273]
JX669471.1_cds_AGN94875.1_1 [protein=polyprotein] [protein_id=AGN94875.1] [location=95..10273]
JX669472.1_cds_AGN94876.1_1 [protein=polyprotein] [protein_id=AGN94876.1] [location=95..10273]
JX669473.1_cds_AGN94877.1_1 [protein=polyprotein] [protein_id=AGN94877.1] [location=95..10273]
JX669474.1_cds_AGN94878.1_1 [protein=polyprotein] [protein_id=AGN94878.1] [location=95..10273]
JX669475.1_cds_AGN94879.1_1 [protein=polyprotein] [protein_id=AGN94879.1] [location=95..10273]
KC759167.1_cds_AGM38094.1_1 [protein=polyprotein] [protein_id=AGM38094.1] [location=95..10273]
JQ922544.1_cds_AFZ40114.1_1 [protein=polyprotein] [protein_id=AFZ40114.1] [location=93..10271]
JQ922545.1_cds_AFZ40115.1_1 [protein=polyprotein] [protein_id=AFZ40115.1] [location=63..10241]
JQ922546.1_cds_AFZ40116.1_1 [protein=polyprotein] [protein_id=AFZ40116.1] [location=63..10241]
JQ922547.1_cds_AFZ40117.1_1 [protein=polyprotein] [protein_id=AFZ40117.1] [location=93..10271]
JQ922548.1_cds_AFZ40118.1_1 [protein=polyprotein] [protein_id=AFZ40118.1] [location=93..10271]
JN903578.1_cds_AFN54940.1_1 [protein=polyprotein] [protein_id=AFN54940.1] [location=84..10262]
JN903579.1_cds_AFN54941.1_1 [protein=polyprotein] [protein_id=AFN54941.1] [location=84..10262]
JN903580.1_cds_AFN54942.1_1 [protein=polyprotein] [protein_id=AFN54942.1] [location=84..10262]
JN903581.1_cds_AFN54943.1_1 [protein=polyprotein] [protein_id=AFN54943.1] [location=84..10262]
JQ675358.1_cds_AFJ91714.1_1 [protein=polyprotein] [protein_id=AFJ91714.1] [location=73..10251]
JQ048541.1_cds_AFD62908.1_1 [protein=polyprotein] [protein_id=AFD62908.1] [location=96..10274]
HQ332177.1_cds_AEA50930.1_1 [protein=polyprotein] [protein_id=AEA50930.1] [location=95..10273]
HQ332178.1_cds_AEA50931.1_1 [protein=polyprotein] [protein_id=AEA50931.1] [location=95..10273]
HQ332179.1_cds_AEA50932.1_1 [protein=polyprotein] [protein_id=AEA50932.1] [location=95..10273]
HQ332180.1_cds_AEA50933.1_1 [protein=polyprotein] [protein_id=AEA50933.1] [location=95..10273]
HQ332181.1_cds_AEA50934.1_1 [protein=polyprotein] [protein_id=AEA50934.1] [location=95..10273]
HQ332182.1_cds_AEA50935.1_1 [protein=polyprotein] [protein_id=AEA50935.1] [location=95..10273]
HQ332183.1_cds_AEA50936.1_1 [protein=polyprotein] [protein_id=AEA50936.1] [location=95..10273]
JQ045626.1_cds_AFD28486.1_1 [protein=polyprotein] [protein_id=AFD28486.1] [location=73..10251]
JQ045628.1_cds_AFD28487.1_1 [protein=polyprotein] [protein_id=AFD28487.1] [location=73..10251]
JQ045629.1_cds_AFD28488.1_1 [protein=polyprotein] [protein_id=AFD28488.1] [location=73..10251]
JQ045630.1_cds_AFD28489.1_1 [protein=polyprotein] [protein_id=AFD28489.1] [location=73..10251]
JQ045631.1_cds_AFD28490.1_1 [protein=polyprotein] [protein_id=AFD28490.1] [location=73..10251]
JQ045632.1_cds_AFD28491.1_1 [protein=polyprotein] [protein_id=AFD28491.1] [location=73..10251]
JQ045633.1_cds_AFD28492.1_1 [protein=polyprotein] [protein_id=AFD28492.1] [location=73..10251]
JQ045634.1_cds_AFD28493.1_1 [protein=polyprotein] [protein_id=AFD28493.1] [location=73..10251]
JQ045635.1_cds_AFD28494.1_1 [protein=polyprotein] [protein_id=AFD28494.1] [location=73..10251]
JQ045636.1_cds_AFD28495.1_1 [protein=polyprotein] [protein_id=AFD28495.1] [location=73..10251]
JQ045637.1_cds_AFD28496.1_1 [protein=polyprotein] [protein_id=AFD28496.1] [location=73..10251]
JQ045638.1_cds_AFD28497.1_1 [protein=polyprotein] [protein_id=AFD28497.1] [location=73..10251]
JQ045639.1_cds_AFD28498.1_1 [protein=polyprotein] [protein_id=AFD28498.1] [location=73..10251]
JQ045640.1_cds_AFD28499.1_1 [protein=polyprotein] [protein_id=AFD28499.1] [location=73..10251]
JQ045641.1_cds_AFD28500.1_1 [protein=polyprotein] [protein_id=AFD28500.1] [location=73..10251]
JQ045642.1_cds_AFD28501.1_1 [protein=polyprotein] [protein_id=AFD28501.1] [location=73..10251]
JQ045643.1_cds_AFD28502.1_1 [protein=polyprotein] [protein_id=AFD28502.1] [location=73..10251]
JQ045644.1_cds_AFD28503.1_1 [protein=polyprotein] [protein_id=AFD28503.1] [location=73..10251]
JQ045645.1_cds_AFD28504.1_1 [protein=polyprotein] [protein_id=AFD28504.1] [location=73..10251]
JQ045646.1_cds_AFD28505.1_1 [protein=polyprotein] [protein_id=AFD28505.1] [location=73..10251]
JQ045647.1_cds_AFD28506.1_1 [protein=polyprotein] [protein_id=AFD28506.1] [location=73..10251]
JQ045648.1_cds_AFD28507.1_1 [protein=polyprotein] [protein_id=AFD28507.1] [location=73..10251]
JQ045649.1_cds_AFD28508.1_1 [protein=polyprotein] [protein_id=AFD28508.1] [location=73..10251]
JQ045650.1_cds_AFD28509.1_1 [protein=polyprotein] [protein_id=AFD28509.1] [location=73..10251]
JQ045651.1_cds_AFD28510.1_1 [protein=polyprotein] [protein_id=AFD28510.1] [location=73..10251]
JQ045652.1_cds_AFD28511.1_1 [protein=polyprotein] [protein_id=AFD28511.1] [location=73..10251]
JQ045653.1_cds_AFD28512.1_1 [protein=polyprotein] [protein_id=AFD28512.1] [location=73..10251]
JQ045654.1_cds_AFD28513.1_1 [protein=polyprotein] [protein_id=AFD28513.1] [location=73..10251]
JQ045655.1_cds_AFD28514.1_1 [protein=polyprotein] [protein_id=AFD28514.1] [location=73..10251]
JQ045656.1_cds_AFD28515.1_1 [protein=polyprotein] [protein_id=AFD28515.1] [location=73..10251]
JQ045657.1_cds_AFD28516.1_1 [protein=polyprotein] [protein_id=AFD28516.1] [location=73..10251]
JQ045658.1_cds_AFD28517.1_1 [protein=polyprotein] [protein_id=AFD28517.1] [location=73..10251]
JQ045659.1_cds_AFD28518.1_1 [protein=polyprotein] [protein_id=AFD28518.1] [location=73..10251]
JQ045660.1_cds_AFD28519.1_1 [protein=polyprotein] [protein_id=AFD28519.1] [location=73..10251]
JQ045661.1_cds_AFD28520.1_1 [protein=polyprotein] [protein_id=AFD28520.1] [location=73..10251]
JQ045662.1_cds_AFD28521.1_1 [protein=polyprotein] [protein_id=AFD28521.1] [location=73..10251]
JQ045663.1_cds_AFD28522.1_1 [protein=polyprotein] [protein_id=AFD28522.1] [location=73..10251]
JQ045664.1_cds_AFD28523.1_1 [protein=polyprotein] [protein_id=AFD28523.1] [location=73..10251]
JQ045665.1_cds_AFD28524.1_1 [protein=polyprotein] [protein_id=AFD28524.1] [location=73..10251]
JQ045666.1_cds_AFD28525.1_1 [protein=polyprotein] [protein_id=AFD28525.1] [location=73..10251]
JQ045667.1_cds_AFD28526.1_1 [protein=polyprotein] [protein_id=AFD28526.1] [location=73..10251]
JQ045668.1_cds_AFD28527.1_1 [protein=polyprotein] [protein_id=AFD28527.1] [location=73..10251]
JN697056.1_cds_AEZ00065.1_1 [protein=polyprotein] [protein_id=AEZ00065.1] [location=95..10273]
JN697057.1_cds_AEZ00066.1_1 [protein=polyprotein] [protein_id=AEZ00066.1] [location=95..10273]
JN697058.1_cds_AEZ00067.1_1 [protein=polyprotein] [protein_id=AEZ00067.1] [location=95..10273]
JQ287660.1_cds_AEX65545.1_1 [protein=polyprotein] [protein_id=AEX65545.1] [location=79..10257]
JQ287661.1_cds_AEX65546.1_1 [protein=polyprotein] [protein_id=AEX65546.1] [location=79..10257]
JQ287662.1_cds_AEX65547.1_1 [protein=polyprotein] [protein_id=AEX65547.1] [location=79..10257]
JQ287663.1_cds_AEX65548.1_1 [protein=polyprotein] [protein_id=AEX65548.1] [location=79..10257]
JQ287664.1_cds_AEX65549.1_1 [protein=polyprotein] [protein_id=AEX65549.1] [location=78..10256]
JQ287665.1_cds_AEX65550.1_1 [protein=polyprotein] [protein_id=AEX65550.1] [location=79..10257]
JQ287666.1_cds_AEX65551.1_1 [protein=polyprotein] [protein_id=AEX65551.1] [location=79..10257]
JQ287667.1_cds_AEX65552.1_1 [protein=polyprotein] [protein_id=AEX65552.1] [location=79..10257]
HM469966.1_cds_ADU03651.1_1 [protein=polyprotein] [protein_id=ADU03651.1] [location=95..10273]
HM469967.1_cds_ADU03652.1_1 [protein=polyprotein] [protein_id=ADU03652.1] [location=95..10273]
HM469968.1_cds_ADU03653.1_1 [protein=polyprotein] [protein_id=ADU03653.1] [location=95..10273]
JN819402.1_cds_AET43234.1_1 [protein=polyprotein] [protein_id=AET43234.1] [location=45..10223]
JN819403.1_cds_AET43235.1_1 [protein=polyprotein] [protein_id=AET43235.1] [location=55..10233]
JN819405.1_cds_AET43236.1_1 [protein=polyprotein] [protein_id=AET43236.1] [location=58..10236]
JN819410.1_cds_AET43241.1_1 [protein=polyprotein] [protein_id=AET43241.1] [location=73..10251]
JN819411.1_cds_AET43242.1_1 [protein=polyprotein] [protein_id=AET43242.1] [location=73..10251]
JN819412.1_cds_AET43243.1_1 [protein=polyprotein] [protein_id=AET43243.1] [location=73..10251]
JN819413.1_cds_AET43244.1_1 [protein=polyprotein] [protein_id=AET43244.1] [location=73..10251]
JN819414.1_cds_AET43245.1_1 [protein=polyprotein] [protein_id=AET43245.1] [location=57..10235]
JN819415.1_cds_AET43246.1_1 [protein=polyprotein] [protein_id=AET43246.1] [location=73..10251]
JN819417.1_cds_AET43248.1_1 [protein=polyprotein] [protein_id=AET43248.1] [location=59..10237]
JN819423.1_cds_AET43254.1_1 [protein=polyprotein] [protein_id=AET43254.1] [location=73..10251]
JN819425.1_cds_AET43256.1_1 [protein=polyprotein] [protein_id=AET43256.1] [location=73..10251]
JF459993.1_cds_AEM92304.1_1 [protein=polyprotein] [protein_id=AEM92304.1] [location=95..10273]
JN054255.1_cds_AEK32178.1_1 [protein=polyprotein] [protein_id=AEK32178.1] [location=95..10273]
JN054256.1_cds_AEK32179.1_1 [protein=polyprotein] [protein_id=AEK32179.1] [location=95..10273]
JN093516.1_cds_AEH59352.1_1 [protein=polyprotein] [protein_id=AEH59352.1] [location=28..10206]
JN000935.1_cds_AEF57555.1_1 [protein=polyprotein] [protein_id=AEF57555.1] [location=79..10257]
JF937596.1_cds_AEF01499.1_1 [protein=polyprotein] [protein_id=AEF01499.1] [location=79..10257]
JF937597.1_cds_AEF01500.1_1 [protein=polyprotein] [protein_id=AEF01500.1] [location=15..10193]
JF937598.1_cds_AEF01501.1_1 [protein=polyprotein] [protein_id=AEF01501.1] [location=79..10257]
JF937599.1_cds_AEF01502.1_1 [protein=polyprotein] [protein_id=AEF01502.1] [location=27..10205]
JF937600.1_cds_AEF01503.1_1 [protein=polyprotein] [protein_id=AEF01503.1] [location=79..10257]
JF937601.1_cds_AEF01504.1_1 [protein=polyprotein] [protein_id=AEF01504.1] [location=27..10205]
JF937602.1_cds_AEF01505.1_1 [protein=polyprotein] [protein_id=AEF01505.1] [location=79..10257]
JF937603.1_cds_AEF01506.1_1 [protein=polyprotein] [protein_id=AEF01506.1] [location=17..10195]
JF937604.1_cds_AEF01507.1_1 [protein=polyprotein] [protein_id=AEF01507.1] [location=78..10256]
JF937605.1_cds_AEF01508.1_1 [protein=polyprotein] [protein_id=AEF01508.1] [location=78..10256]
JF937606.1_cds_AEF01509.1_1 [protein=polyprotein] [protein_id=AEF01509.1] [location=79..10257]
JF937607.1_cds_AEF01510.1_1 [protein=polyprotein] [protein_id=AEF01510.1] [location=79..10257]
JF937608.1_cds_AEF01511.1_1 [protein=polyprotein] [protein_id=AEF01511.1] [location=79..10257]
JF937609.1_cds_AEF01512.1_1 [protein=polyprotein] [protein_id=AEF01512.1] [location=79..10257]
JF937610.1_cds_AEF01513.1_1 [protein=polyprotein] [protein_id=AEF01513.1] [location=79..10257]
JF937611.1_cds_AEF01514.1_1 [protein=polyprotein] [protein_id=AEF01514.1] [location=79..10257]
JF937612.1_cds_AEF01515.1_1 [protein=polyprotein] [protein_id=AEF01515.1] [location=79..10257]
JF937613.1_cds_AEF01516.1_1 [protein=polyprotein] [protein_id=AEF01516.1] [location=21..10199]
JF937614.1_cds_AEF01517.1_1 [protein=polyprotein] [protein_id=AEF01517.1] [location=79..10257]
JF937615.1_cds_AEF01518.1_1 [protein=polyprotein] [protein_id=AEF01518.1] [location=80..10261]
JF937616.1_cds_AEF01519.1_1 [protein=polyprotein] [protein_id=AEF01519.1] [location=66..10244]
JF937617.1_cds_AEF01520.1_1 [protein=polyprotein] [protein_id=AEF01520.1] [location=79..10257]
JF937618.1_cds_AEF01521.1_1 [protein=polyprotein] [protein_id=AEF01521.1] [location=79..10257]
JF937619.1_cds_AEF01522.1_1 [protein=polyprotein] [protein_id=AEF01522.1] [location=79..10257]
JF937635.1_cds_AEF01538.1_1 [protein=polyprotein] [protein_id=AEF01538.1] [location=100..10278]
JF937644.1_cds_AEF01547.1_1 [protein=polyprotein] [protein_id=AEF01547.1] [location=79..10257]
JF937645.1_cds_AEF01548.1_1 [protein=polyprotein] [protein_id=AEF01548.1] [location=79..10257]
JF937649.1_cds_AEF01552.1_1 [protein=polyprotein] [protein_id=AEF01552.1] [location=78..10256]
JF937650.1_cds_AEF01553.1_1 [protein=polyprotein] [protein_id=AEF01553.1] [location=79..10257]
JF937651.1_cds_AEF01554.1_1 [protein=polyprotein] [protein_id=AEF01554.1] [location=79..10257]
HQ891313.1_cds_AEB98754.1_1 [protein=polyprotein] [protein_id=AEB98754.1] [location=95..10273]
HQ891314.1_cds_AEB98755.1_1 [protein=polyprotein] [protein_id=AEB98755.1] [location=95..10273]
HQ891315.1_cds_AEB98756.1_1 [protein=polyprotein] [protein_id=AEB98756.1] [location=95..10273]
HQ891316.1_cds_AEB98757.1_1 [protein=polyprotein] [protein_id=AEB98757.1] [location=95..10273]
HQ166035.1_cds_ADO97103.1_1 [protein=polyprotein] [protein_id=ADO97103.1] [location=39..10217]
HQ166036.1_cds_ADO97104.1_1 [protein=polyprotein] [protein_id=ADO97104.1] [location=72..10250]
GQ398255.1_cds_ADK37471.1_1 [protein=polyprotein] [protein_id=ADK37471.1] [location=95..10273]
HM488255.1_cds_ADK26433.1_1 [protein=polyprotein] [protein_id=ADK26433.1] [location=29..10207]
HM488256.1_cds_ADK26434.1_1 [protein=polyprotein] [protein_id=ADK26434.1] [location=56..10234]
HM631850.1_cds_ADK26437.1_1 [protein=polyprotein] [protein_id=ADK26437.1] [location=58..10236]
HM181936.1_cds_ADI80620.1_1 [protein=polyprotein] [protein_id=ADI80620.1] [location=59..10237]
HM181937.1_cds_ADI80621.1_1 [protein=polyprotein] [protein_id=ADI80621.1] [location=59..10237]
HM181938.1_cds_ADI80622.1_1 [protein=polyprotein] [protein_id=ADI80622.1] [location=73..10251]
HM181939.1_cds_ADI80623.1_1 [protein=polyprotein] [protein_id=ADI80623.1] [location=73..10251]
HM181940.1_cds_ADI80624.1_1 [protein=polyprotein] [protein_id=ADI80624.1] [location=60..10238]
HM181941.1_cds_ADI80625.1_1 [protein=polyprotein] [protein_id=ADI80625.1] [location=46..10224]
HM181942.1_cds_ADI80626.1_1 [protein=polyprotein] [protein_id=ADI80626.1] [location=69..10247]
HM181943.1_cds_ADI80627.1_1 [protein=polyprotein] [protein_id=ADI80627.1] [location=61..10239]
HM181944.1_cds_ADI80628.1_1 [protein=polyprotein] [protein_id=ADI80628.1] [location=73..10251]
HM181945.1_cds_ADI80629.1_1 [protein=polyprotein] [protein_id=ADI80629.1] [location=73..10251]
HM181946.1_cds_ADI80630.1_1 [protein=polyprotein] [protein_id=ADI80630.1] [location=71..10249]
HM181947.1_cds_ADI80631.1_1 [protein=polyprotein] [protein_id=ADI80631.1] [location=60..10238]
HM181948.1_cds_ADI80632.1_1 [protein=polyprotein] [protein_id=ADI80632.1] [location=59..10237]
HM181949.1_cds_ADI80633.1_1 [protein=polyprotein] [protein_id=ADI80633.1] [location=72..10250]
HM181950.1_cds_ADI80634.1_1 [protein=polyprotein] [protein_id=ADI80634.1] [location=52..10230]
HM181951.1_cds_ADI80635.1_1 [protein=polyprotein] [protein_id=ADI80635.1] [location=59..10237]
HM181952.1_cds_ADI80636.1_1 [protein=polyprotein] [protein_id=ADI80636.1] [location=73..10251]
HM181953.1_cds_ADI80637.1_1 [protein=polyprotein] [protein_id=ADI80637.1] [location=59..10237]
HM181954.1_cds_ADI80638.1_1 [protein=polyprotein] [protein_id=ADI80638.1] [location=62..10240]
HM181955.1_cds_ADI80639.1_1 [protein=polyprotein] [protein_id=ADI80639.1] [location=59..10237]
HM181956.1_cds_ADI80640.1_1 [protein=polyprotein] [protein_id=ADI80640.1] [location=59..10237]
HM181957.1_cds_ADI80641.1_1 [protein=polyprotein] [protein_id=ADI80641.1] [location=73..10251]
HM181958.1_cds_ADI80642.1_1 [protein=polyprotein] [protein_id=ADI80642.1] [location=67..10245]
HM181959.1_cds_ADI80643.1_1 [protein=polyprotein] [protein_id=ADI80643.1] [location=59..10237]
HM181960.1_cds_ADI80644.1_1 [protein=polyprotein] [protein_id=ADI80644.1] [location=58..10236]
HM181961.1_cds_ADI80645.1_1 [protein=polyprotein] [protein_id=ADI80645.1] [location=57..10235]
HM181962.1_cds_ADI80646.1_1 [protein=polyprotein] [protein_id=ADI80646.1] [location=58..10236]
HM181963.1_cds_ADI80647.1_1 [protein=polyprotein] [protein_id=ADI80647.1] [location=40..10218]
HM181964.1_cds_ADI80648.1_1 [protein=polyprotein] [protein_id=ADI80648.1] [location=42..10220]
HM181965.1_cds_ADI80649.1_1 [protein=polyprotein] [protein_id=ADI80649.1] [location=73..10251]
HM181966.1_cds_ADI80650.1_1 [protein=polyprotein] [protein_id=ADI80650.1] [location=73..10251]
HM181967.1_cds_ADI80651.1_1 [protein=polyprotein] [protein_id=ADI80651.1] [location=59..10237]
HM181968.1_cds_ADI80652.1_1 [protein=polyprotein] [protein_id=ADI80652.1] [location=73..10251]
HM181969.1_cds_ADI80653.1_1 [protein=polyprotein] [protein_id=ADI80653.1] [location=41..10219]
HM181970.1_cds_ADI80654.1_1 [protein=polyprotein] [protein_id=ADI80654.1] [location=59..10237]
GU131948.1_cds_ADA60760.1_1 [protein=polyprotein] [protein_id=ADA60760.1] [location=73..10251]
GU131949.1_cds_ADA60761.1_1 [protein=polyprotein] [protein_id=ADA60761.1] [location=73..10251]
GU131956.1_cds_ADA60767.1_1 [protein=polyprotein] [protein_id=ADA60767.1] [location=73..10251]
GU131957.1_cds_ADA60768.1_1 [protein=polyprotein] [protein_id=ADA60768.1] [location=60..10238]
GU131958.1_cds_ADA60769.1_1 [protein=polyprotein] [protein_id=ADA60769.1] [location=73..10251]
GU131960.1_cds_ADA60771.1_1 [protein=polyprotein] [protein_id=ADA60771.1] [location=73..10251]
GU131961.1_cds_ADA60772.1_1 [protein=polyprotein] [protein_id=ADA60772.1] [location=73..10251]
GU131962.1_cds_ADA60773.1_1 [protein=polyprotein] [protein_id=ADA60773.1] [location=73..10242]
GU131963.1_cds_ADA60774.1_1 [protein=polyprotein] [protein_id=ADA60774.1] [location=73..10251]
GU131964.1_cds_ADA60775.1_1 [protein=polyprotein] [protein_id=ADA60775.1] [location=73..10251]
GU131965.1_cds_ADA60776.1_1 [protein=polyprotein] [protein_id=ADA60776.1] [location=48..10226]
GU131966.1_cds_ADA60777.1_1 [protein=polyprotein] [protein_id=ADA60777.1] [location=38..10216]
GU131967.1_cds_ADA60778.1_1 [protein=polyprotein] [protein_id=ADA60778.1] [location=64..10242]
GU131968.1_cds_ADA60779.1_1 [protein=polyprotein] [protein_id=ADA60779.1] [location=73..10251]
GU131969.1_cds_ADA60780.1_1 [protein=polyprotein] [protein_id=ADA60780.1] [location=59..10237]
GU131970.1_cds_ADA60781.1_1 [protein=polyprotein] [protein_id=ADA60781.1] [location=58..10236]
GU131971.1_cds_ADA60782.1_1 [protein=polyprotein] [protein_id=ADA60782.1] [location=48..10226]
GU131972.1_cds_ADA60783.1_1 [protein=polyprotein] [protein_id=ADA60783.1] [location=73..10251]
GU131973.1_cds_ADA60784.1_1 [protein=polyprotein] [protein_id=ADA60784.1] [location=73..10251]
GU131976.1_cds_ADA60787.1_1 [protein=polyprotein] [protein_id=ADA60787.1] [location=74..10252]
GU131977.1_cds_ADA60788.1_1 [protein=polyprotein] [protein_id=ADA60788.1] [location=72..10250]
GU131978.1_cds_ADA60789.1_1 [protein=polyprotein] [protein_id=ADA60789.1] [location=72..10250]
GU131979.1_cds_ADA60790.1_1 [protein=polyprotein] [protein_id=ADA60790.1] [location=59..10237]
GU131980.1_cds_ADA60791.1_1 [protein=polyprotein] [protein_id=ADA60791.1] [location=41..10219]
GU131981.1_cds_ADA60792.1_1 [protein=polyprotein] [protein_id=ADA60792.1] [location=38..10216]
GU131982.1_cds_ADA60793.1_1 [protein=polyprotein] [protein_id=ADA60793.1] [location=73..10251]
GU131983.1_cds_ADA60794.1_1 [protein=polyprotein] [protein_id=ADA60794.1] [location=73..10251]
GU056029.1_cds_ACY70572.1_1 [protein=polyprotein] [protein_id=ACY70572.1] [location=73..10251]
GU056030.1_cds_ACY70573.1_1 [protein=polyprotein] [protein_id=ACY70573.1] [location=73..10251]
GU056031.1_cds_ACY70574.1_1 [protein=polyprotein] [protein_id=ACY70574.1] [location=62..10240]
GU056032.1_cds_ACY70575.1_1 [protein=polyprotein] [protein_id=ACY70575.1] [location=61..10239]
GU056033.1_cds_ACY70576.1_1 [protein=polyprotein] [protein_id=ACY70576.1] [location=58..10236]
GU131678.1_cds_ACY70577.1_1 [protein=polyprotein] [protein_id=ACY70577.1] [location=59..10237]
GU131679.1_cds_ACY70578.1_1 [protein=polyprotein] [protein_id=ACY70578.1] [location=59..10237]
GU131680.1_cds_ACY70579.1_1 [protein=polyprotein] [protein_id=ACY70579.1] [location=58..10236]
GU131681.1_cds_ACY70580.1_1 [protein=polyprotein] [protein_id=ACY70580.1] [location=59..10237]
GU131682.1_cds_ACY70581.1_1 [protein=polyprotein] [protein_id=ACY70581.1] [location=73..10251]
GU131683.1_cds_ACY70582.1_1 [protein=polyprotein] [protein_id=ACY70582.1] [location=71..10249]
GU131684.1_cds_ACY70583.1_1 [protein=polyprotein] [protein_id=ACY70583.1] [location=44..10222]
GU131685.1_cds_ACY70584.1_1 [protein=polyprotein] [protein_id=ACY70584.1] [location=56..10234]
GU131686.1_cds_ACY70585.1_1 [protein=polyprotein] [protein_id=ACY70585.1] [location=73..10251]
GU131687.1_cds_ACY70586.1_1 [protein=polyprotein] [protein_id=ACY70586.1] [location=58..10236]
GU131688.1_cds_ACY70587.1_1 [protein=polyprotein] [protein_id=ACY70587.1] [location=73..10251]
GU131689.1_cds_ACY70588.1_1 [protein=polyprotein] [protein_id=ACY70588.1] [location=58..10236]
GU131690.1_cds_ACY70589.1_1 [protein=polyprotein] [protein_id=ACY70589.1] [location=73..10251]
GU131691.1_cds_ACY70590.1_1 [protein=polyprotein] [protein_id=ACY70590.1] [location=51..10229]
GU131692.1_cds_ACY70591.1_1 [protein=polyprotein] [protein_id=ACY70591.1] [location=73..10251]
GU131693.1_cds_ACY70592.1_1 [protein=polyprotein] [protein_id=ACY70592.1] [location=59..10237]
GU131694.1_cds_ACY70593.1_1 [protein=polyprotein] [protein_id=ACY70593.1] [location=59..10237]
GU131695.1_cds_ACY70594.1_1 [protein=polyprotein] [protein_id=ACY70594.1] [location=64..10242]
GU131696.1_cds_ACY70595.1_1 [protein=polyprotein] [protein_id=ACY70595.1] [location=60..10238]
GU131697.1_cds_ACY70596.1_1 [protein=polyprotein] [protein_id=ACY70596.1] [location=40..10218]
GU131698.1_cds_ACY70597.1_1 [protein=polyprotein] [protein_id=ACY70597.1] [location=73..10251]
GU131699.1_cds_ACY70598.1_1 [protein=polyprotein] [protein_id=ACY70598.1] [location=73..10251]
GU131700.1_cds_ACY70599.1_1 [protein=polyprotein] [protein_id=ACY70599.1] [location=73..10251]
GU131701.1_cds_ACY70600.1_1 [protein=polyprotein] [protein_id=ACY70600.1] [location=59..10237]
GU131702.1_cds_ACY70601.1_1 [protein=polyprotein] [protein_id=ACY70601.1] [location=73..10251]
GU131703.1_cds_ACY70602.1_1 [protein=polyprotein] [protein_id=ACY70602.1] [location=58..10236]
GU131704.1_cds_ACY70603.1_1 [protein=polyprotein] [protein_id=ACY70603.1] [location=64..10242]
GU131705.1_cds_ACY70604.1_1 [protein=polyprotein] [protein_id=ACY70604.1] [location=63..10241]
GU131706.1_cds_ACY70605.1_1 [protein=polyprotein] [protein_id=ACY70605.1] [location=64..10242]
GU131707.1_cds_ACY70606.1_1 [protein=polyprotein] [protein_id=ACY70606.1] [location=52..10230]
GU131708.1_cds_ACY70607.1_1 [protein=polyprotein] [protein_id=ACY70607.1] [location=63..10241]
GU131709.1_cds_ACY70608.1_1 [protein=polyprotein] [protein_id=ACY70608.1] [location=59..10237]
GU131710.1_cds_ACY70609.1_1 [protein=polyprotein] [protein_id=ACY70609.1] [location=73..10251]
GU131711.1_cds_ACY70610.1_1 [protein=polyprotein] [protein_id=ACY70610.1] [location=51..10229]
GU131712.1_cds_ACY70611.1_1 [protein=polyprotein] [protein_id=ACY70611.1] [location=62..10240]
GU131713.1_cds_ACY70612.1_1 [protein=polyprotein] [protein_id=ACY70612.1] [location=59..10237]
GU131714.1_cds_ACY70613.1_1 [protein=polyprotein] [protein_id=ACY70613.1] [location=54..10232]
GU131715.1_cds_ACY70614.1_1 [protein=polyprotein] [protein_id=ACY70614.1] [location=60..10238]
GU131716.1_cds_ACY70615.1_1 [protein=polyprotein] [protein_id=ACY70615.1] [location=59..10237]
GU131717.1_cds_ACY70616.1_1 [protein=polyprotein] [protein_id=ACY70616.1] [location=57..10235]
GU131718.1_cds_ACY70617.1_1 [protein=polyprotein] [protein_id=ACY70617.1] [location=73..10251]
GU131719.1_cds_ACY70618.1_1 [protein=polyprotein] [protein_id=ACY70618.1] [location=49..10227]
GU131720.1_cds_ACY70619.1_1 [protein=polyprotein] [protein_id=ACY70619.1] [location=59..10237]
GU131721.1_cds_ACY70620.1_1 [protein=polyprotein] [protein_id=ACY70620.1] [location=73..10251]
GU131722.1_cds_ACY70621.1_1 [protein=polyprotein] [protein_id=ACY70621.1] [location=73..10251]
GU131723.1_cds_ACY70622.1_1 [protein=polyprotein] [protein_id=ACY70622.1] [location=59..10237]
GU131724.1_cds_ACY70623.1_1 [protein=polyprotein] [protein_id=ACY70623.1] [location=62..10240]
GU131725.1_cds_ACY70624.1_1 [protein=polyprotein] [protein_id=ACY70624.1] [location=59..10237]
GU131726.1_cds_ACY70625.1_1 [protein=polyprotein] [protein_id=ACY70625.1] [location=73..10251]
GU131727.1_cds_ACY70626.1_1 [protein=polyprotein] [protein_id=ACY70626.1] [location=73..10251]
GU131728.1_cds_ACY70627.1_1 [protein=polyprotein] [protein_id=ACY70627.1] [location=59..10237]
GU131729.1_cds_ACY70628.1_1 [protein=polyprotein] [protein_id=ACY70628.1] [location=53..10231]
GU131730.1_cds_ACY70629.1_1 [protein=polyprotein] [protein_id=ACY70629.1] [location=33..10211]
GU131731.1_cds_ACY70630.1_1 [protein=polyprotein] [protein_id=ACY70630.1] [location=49..10227]
GU131732.1_cds_ACY70631.1_1 [protein=polyprotein] [protein_id=ACY70631.1] [location=63..10241]
GU131733.1_cds_ACY70632.1_1 [protein=polyprotein] [protein_id=ACY70632.1] [location=73..10251]
GU131734.1_cds_ACY70633.1_1 [protein=polyprotein] [protein_id=ACY70633.1] [location=55..10233]
GU131735.1_cds_ACY70634.1_1 [protein=polyprotein] [protein_id=ACY70634.1] [location=73..10251]
GU131736.1_cds_ACY70635.1_1 [protein=polyprotein] [protein_id=ACY70635.1] [location=59..10237]
GU131737.1_cds_ACY70636.1_1 [protein=polyprotein] [protein_id=ACY70636.1] [location=59..10237]
GU131738.1_cds_ACY70637.1_1 [protein=polyprotein] [protein_id=ACY70637.1] [location=73..10251]
GU131739.1_cds_ACY70638.1_1 [protein=polyprotein] [protein_id=ACY70638.1] [location=73..10251]
GU131740.1_cds_ACY70639.1_1 [protein=polyprotein] [protein_id=ACY70639.1] [location=73..10251]
GU131741.1_cds_ACY70640.1_1 [protein=polyprotein] [protein_id=ACY70640.1] [location=51..10229]
GU131742.1_cds_ACY70641.1_1 [protein=polyprotein] [protein_id=ACY70641.1] [location=47..10225]
GU131743.1_cds_ACY70642.1_1 [protein=polyprotein] [protein_id=ACY70642.1] [location=59..10237]
GU131744.1_cds_ACY70643.1_1 [protein=polyprotein] [protein_id=ACY70643.1] [location=41..10219]
GU131745.1_cds_ACY70644.1_1 [protein=polyprotein] [protein_id=ACY70644.1] [location=73..10251]
GU131746.1_cds_ACY70645.1_1 [protein=polyprotein] [protein_id=ACY70645.1] [location=59..10237]
GU131747.1_cds_ACY70646.1_1 [protein=polyprotein] [protein_id=ACY70646.1] [location=73..10251]
GU131748.1_cds_ACY70647.1_1 [protein=polyprotein] [protein_id=ACY70647.1] [location=73..10251]
GU131749.1_cds_ACY70648.1_1 [protein=polyprotein] [protein_id=ACY70648.1] [location=73..10251]
GU131750.1_cds_ACY70649.1_1 [protein=polyprotein] [protein_id=ACY70649.1] [location=73..10251]
GU131751.1_cds_ACY70650.1_1 [protein=polyprotein] [protein_id=ACY70650.1] [location=40..10218]
GU131752.1_cds_ACY70651.1_1 [protein=polyprotein] [protein_id=ACY70651.1] [location=58..10236]
GU131753.1_cds_ACY70652.1_1 [protein=polyprotein] [protein_id=ACY70652.1] [location=58..10236]
GU131754.1_cds_ACY70653.1_1 [protein=polyprotein] [protein_id=ACY70653.1] [location=73..10251]
GU131755.1_cds_ACY70654.1_1 [protein=polyprotein] [protein_id=ACY70654.1] [location=73..10251]
GU131756.1_cds_ACY70655.1_1 [protein=polyprotein] [protein_id=ACY70655.1] [location=61..10239]
GU131757.1_cds_ACY70656.1_1 [protein=polyprotein] [protein_id=ACY70656.1] [location=58..10236]
GU131758.1_cds_ACY70657.1_1 [protein=polyprotein] [protein_id=ACY70657.1] [location=73..10251]
GU131759.1_cds_ACY70658.1_1 [protein=polyprotein] [protein_id=ACY70658.1] [location=73..10251]
GU131760.1_cds_ACY70659.1_1 [protein=polyprotein] [protein_id=ACY70659.1] [location=61..10239]
GU131761.1_cds_ACY70660.1_1 [protein=polyprotein] [protein_id=ACY70660.1] [location=73..10251]
GU131762.1_cds_ACY70661.1_1 [protein=polyprotein] [protein_id=ACY70661.1] [location=64..10242]
GU131763.1_cds_ACY70662.1_1 [protein=polyprotein] [protein_id=ACY70662.1] [location=61..10239]
GU131764.1_cds_ACY70663.1_1 [protein=polyprotein] [protein_id=ACY70663.1] [location=58..10236]
GU131765.1_cds_ACY70664.1_1 [protein=polyprotein] [protein_id=ACY70664.1] [location=72..10250]
GU131766.1_cds_ACY70665.1_1 [protein=polyprotein] [protein_id=ACY70665.1] [location=73..10251]
GU131767.1_cds_ACY70666.1_1 [protein=polyprotein] [protein_id=ACY70666.1] [location=59..10237]
GU131768.1_cds_ACY70667.1_1 [protein=polyprotein] [protein_id=ACY70667.1] [location=58..10236]
GU131769.1_cds_ACY70668.1_1 [protein=polyprotein] [protein_id=ACY70668.1] [location=59..10237]
GU131770.1_cds_ACY70669.1_1 [protein=polyprotein] [protein_id=ACY70669.1] [location=68..10246]
GU131771.1_cds_ACY70670.1_1 [protein=polyprotein] [protein_id=ACY70670.1] [location=49..10227]
GU131772.1_cds_ACY70671.1_1 [protein=polyprotein] [protein_id=ACY70671.1] [location=61..10239]
GU131773.1_cds_ACY70672.1_1 [protein=polyprotein] [protein_id=ACY70672.1] [location=73..10251]
GU131774.1_cds_ACY70673.1_1 [protein=polyprotein] [protein_id=ACY70673.1] [location=55..10233]
GU131775.1_cds_ACY70674.1_1 [protein=polyprotein] [protein_id=ACY70674.1] [location=73..10251]
GU131776.1_cds_ACY70675.1_1 [protein=polyprotein] [protein_id=ACY70675.1] [location=55..10233]
GU131777.1_cds_ACY70676.1_1 [protein=polyprotein] [protein_id=ACY70676.1] [location=65..10243]
GU131778.1_cds_ACY70677.1_1 [protein=polyprotein] [protein_id=ACY70677.1] [location=61..10239]
GU131779.1_cds_ACY70678.1_1 [protein=polyprotein] [protein_id=ACY70678.1] [location=73..10251]
GU131780.1_cds_ACY70679.1_1 [protein=polyprotein] [protein_id=ACY70679.1] [location=62..10240]
GU131781.1_cds_ACY70680.1_1 [protein=polyprotein] [protein_id=ACY70680.1] [location=59..10237]
GU131782.1_cds_ACY70681.1_1 [protein=polyprotein] [protein_id=ACY70681.1] [location=59..10237]
GU131783.1_cds_ACY70682.1_1 [protein=polyprotein] [protein_id=ACY70682.1] [location=73..10251]
GU131784.1_cds_ACY70683.1_1 [protein=polyprotein] [protein_id=ACY70683.1] [location=63..10241]
GU131785.1_cds_ACY70684.1_1 [protein=polyprotein] [protein_id=ACY70684.1] [location=61..10239]
GU131786.1_cds_ACY70685.1_1 [protein=polyprotein] [protein_id=ACY70685.1] [location=63..10241]
GU131787.1_cds_ACY70686.1_1 [protein=polyprotein] [protein_id=ACY70686.1] [location=58..10236]
GU131788.1_cds_ACY70687.1_1 [protein=polyprotein] [protein_id=ACY70687.1] [location=61..10239]
GU131789.1_cds_ACY70688.1_1 [protein=polyprotein] [protein_id=ACY70688.1] [location=73..10251]
GU131790.1_cds_ACY70689.1_1 [protein=polyprotein] [protein_id=ACY70689.1] [location=62..10240]
GU131791.1_cds_ACY70690.1_1 [protein=polyprotein] [protein_id=ACY70690.1] [location=73..10251]
GU131792.1_cds_ACY70691.1_1 [protein=polyprotein] [protein_id=ACY70691.1] [location=54..10232]
GU131793.1_cds_ACY70692.1_1 [protein=polyprotein] [protein_id=ACY70692.1] [location=59..10237]
GU131794.1_cds_ACY70693.1_1 [protein=polyprotein] [protein_id=ACY70693.1] [location=59..10237]
GU131795.1_cds_ACY70694.1_1 [protein=polyprotein] [protein_id=ACY70694.1] [location=59..10237]
GU131796.1_cds_ACY70695.1_1 [protein=polyprotein] [protein_id=ACY70695.1] [location=64..10242]
GU131797.1_cds_ACY70696.1_1 [protein=polyprotein] [protein_id=ACY70696.1] [location=62..10240]
GU131798.1_cds_ACY70697.1_1 [protein=polyprotein] [protein_id=ACY70697.1] [location=58..10236]
GU131799.1_cds_ACY70698.1_1 [protein=polyprotein] [protein_id=ACY70698.1] [location=59..10237]
GU131800.1_cds_ACY70699.1_1 [protein=polyprotein] [protein_id=ACY70699.1] [location=64..10242]
GU131801.1_cds_ACY70700.1_1 [protein=polyprotein] [protein_id=ACY70700.1] [location=54..10232]
GU131802.1_cds_ACY70701.1_1 [protein=polyprotein] [protein_id=ACY70701.1] [location=73..10251]
GU131803.1_cds_ACY70702.1_1 [protein=polyprotein] [protein_id=ACY70702.1] [location=54..10232]
GU131804.1_cds_ACY70703.1_1 [protein=polyprotein] [protein_id=ACY70703.1] [location=55..10233]
GU131805.1_cds_ACY70704.1_1 [protein=polyprotein] [protein_id=ACY70704.1] [location=48..10226]
GU131806.1_cds_ACY70705.1_1 [protein=polyprotein] [protein_id=ACY70705.1] [location=59..10237]
GU131807.1_cds_ACY70706.1_1 [protein=polyprotein] [protein_id=ACY70706.1] [location=35..10213]
GU131808.1_cds_ACY70707.1_1 [protein=polyprotein] [protein_id=ACY70707.1] [location=73..10251]
GU131809.1_cds_ACY70708.1_1 [protein=polyprotein] [protein_id=ACY70708.1] [location=61..10239]
GU131810.1_cds_ACY70709.1_1 [protein=polyprotein] [protein_id=ACY70709.1] [location=65..10243]
GU131811.1_cds_ACY70710.1_1 [protein=polyprotein] [protein_id=ACY70710.1] [location=52..10230]
GU131812.1_cds_ACY70711.1_1 [protein=polyprotein] [protein_id=ACY70711.1] [location=73..10251]
GU131813.1_cds_ACY70712.1_1 [protein=polyprotein] [protein_id=ACY70712.1] [location=61..10239]
GU131814.1_cds_ACY70713.1_1 [protein=polyprotein] [protein_id=ACY70713.1] [location=59..10237]
GU131815.1_cds_ACY70714.1_1 [protein=polyprotein] [protein_id=ACY70714.1] [location=40..10218]
GU131816.1_cds_ACY70715.1_1 [protein=polyprotein] [protein_id=ACY70715.1] [location=73..10251]
GU131817.1_cds_ACY70716.1_1 [protein=polyprotein] [protein_id=ACY70716.1] [location=73..10251]
GU131818.1_cds_ACY70717.1_1 [protein=polyprotein] [protein_id=ACY70717.1] [location=58..10236]
GU131819.1_cds_ACY70718.1_1 [protein=polyprotein] [protein_id=ACY70718.1] [location=59..10237]
GU131820.1_cds_ACY70719.1_1 [protein=polyprotein] [protein_id=ACY70719.1] [location=60..10238]
GU131821.1_cds_ACY70720.1_1 [protein=polyprotein] [protein_id=ACY70720.1] [location=73..10251]
GU131822.1_cds_ACY70721.1_1 [protein=polyprotein] [protein_id=ACY70721.1] [location=66..10244]
GU131823.1_cds_ACY70722.1_1 [protein=polyprotein] [protein_id=ACY70722.1] [location=73..10251]
GU131824.1_cds_ACY70723.1_1 [protein=polyprotein] [protein_id=ACY70723.1] [location=62..10240]
GU131825.1_cds_ACY70724.1_1 [protein=polyprotein] [protein_id=ACY70724.1] [location=59..10237]
GU131826.1_cds_ACY70725.1_1 [protein=polyprotein] [protein_id=ACY70725.1] [location=55..10233]
GU131827.1_cds_ACY70726.1_1 [protein=polyprotein] [protein_id=ACY70726.1] [location=73..10251]
GU131828.1_cds_ACY70727.1_1 [protein=polyprotein] [protein_id=ACY70727.1] [location=65..10243]
GU131829.1_cds_ACY70728.1_1 [protein=polyprotein] [protein_id=ACY70728.1] [location=63..10241]
GU131830.1_cds_ACY70729.1_1 [protein=polyprotein] [protein_id=ACY70729.1] [location=50..10228]
GU131831.1_cds_ACY70730.1_1 [protein=polyprotein] [protein_id=ACY70730.1] [location=64..10242]
GU131832.1_cds_ACY70731.1_1 [protein=polyprotein] [protein_id=ACY70731.1] [location=47..10225]
GU131833.1_cds_ACY70732.1_1 [protein=polyprotein] [protein_id=ACY70732.1] [location=59..10237]
GU131834.1_cds_ACY70733.1_1 [protein=polyprotein] [protein_id=ACY70733.1] [location=44..10222]
GU131835.1_cds_ACY70734.1_1 [protein=polyprotein] [protein_id=ACY70734.1] [location=57..10235]
GU131836.1_cds_ACY70735.1_1 [protein=polyprotein] [protein_id=ACY70735.1] [location=59..10237]
GU131837.1_cds_ACY70736.1_1 [protein=polyprotein] [protein_id=ACY70736.1] [location=42..10220]
GU131838.1_cds_ACY70737.1_1 [protein=polyprotein] [protein_id=ACY70737.1] [location=59..10237]
GU131839.1_cds_ACY70738.1_1 [protein=polyprotein] [protein_id=ACY70738.1] [location=47..10225]
GU131840.1_cds_ACY70739.1_1 [protein=polyprotein] [protein_id=ACY70739.1] [location=73..10251]
GU131841.1_cds_ACY70740.1_1 [protein=polyprotein] [protein_id=ACY70740.1] [location=73..10251]
GU131842.1_cds_ACY70741.1_1 [protein=polyprotein] [protein_id=ACY70741.1] [location=60..10238]
GU131863.1_cds_ACY70762.1_1 [protein=polyprotein] [protein_id=ACY70762.1] [location=73..10251]
GU131887.1_cds_ACY70786.1_1 [protein=polyprotein] [protein_id=ACY70786.1] [location=48..10226]
GU131888.1_cds_ACY70787.1_1 [protein=polyprotein] [protein_id=ACY70787.1] [location=54..10232]
GU131889.1_cds_ACY70788.1_1 [protein=polyprotein] [protein_id=ACY70788.1] [location=66..10244]
GU131890.1_cds_ACY70789.1_1 [protein=polyprotein] [protein_id=ACY70789.1] [location=63..10241]
GU131891.1_cds_ACY70790.1_1 [protein=polyprotein] [protein_id=ACY70790.1] [location=51..10229]
GU131892.1_cds_ACY70791.1_1 [protein=polyprotein] [protein_id=ACY70791.1] [location=72..10250]
GU131893.1_cds_ACY70792.1_1 [protein=polyprotein] [protein_id=ACY70792.1] [location=65..10243]
GU131894.1_cds_ACY70793.1_1 [protein=polyprotein] [protein_id=ACY70793.1] [location=52..10230]
GU131895.1_cds_ACY70794.1_1 [protein=polyprotein] [protein_id=ACY70794.1] [location=61..10239]
GU131919.1_cds_ACY70818.1_1 [protein=polyprotein] [protein_id=ACY70818.1] [location=73..10251]
GU131920.1_cds_ACY70819.1_1 [protein=polyprotein] [protein_id=ACY70819.1] [location=73..10251]
GU131921.1_cds_ACY70820.1_1 [protein=polyprotein] [protein_id=ACY70820.1] [location=73..10251]
GU131922.1_cds_ACY70821.1_1 [protein=polyprotein] [protein_id=ACY70821.1] [location=73..10251]
GU131923.1_cds_ACY70822.1_1 [protein=polyprotein] [protein_id=ACY70822.1] [location=73..10251]
GU131925.1_cds_ACY70824.1_1 [protein=polyprotein] [protein_id=ACY70824.1] [location=73..10251]
GU131926.1_cds_ACY70825.1_1 [protein=polyprotein] [protein_id=ACY70825.1] [location=73..10251]
GQ868498.1_cds_ACW82938.1_1 [protein=polyprotein] [protein_id=ACW82938.1] [location=73..10251]
GQ868499.1_cds_ACW82939.1_1 [protein=polyprotein] [protein_id=ACW82939.1] [location=73..10251]
GQ868500.1_cds_ACW82940.1_1 [protein=polyprotein] [protein_id=ACW82940.1] [location=73..10251]
GQ868501.1_cds_ACW82941.1_1 [protein=polyprotein] [protein_id=ACW82941.1] [location=73..10251]
GQ868502.1_cds_ACW82942.1_1 [protein=polyprotein] [protein_id=ACW82942.1] [location=72..10250]
GQ868503.1_cds_ACW82943.1_1 [protein=polyprotein] [protein_id=ACW82943.1] [location=58..10236]
GQ868504.1_cds_ACW82944.1_1 [protein=polyprotein] [protein_id=ACW82944.1] [location=73..10251]
GQ868505.1_cds_ACW82945.1_1 [protein=polyprotein] [protein_id=ACW82945.1] [location=73..10251]
GQ868506.1_cds_ACW82946.1_1 [protein=polyprotein] [protein_id=ACW82946.1] [location=73..10251]
GQ868507.1_cds_ACW82947.1_1 [protein=polyprotein] [protein_id=ACW82947.1] [location=73..10251]
GQ868508.1_cds_ACW82948.1_1 [protein=polyprotein] [protein_id=ACW82948.1] [location=73..10251]
GQ868509.1_cds_ACW82949.1_1 [protein=polyprotein] [protein_id=ACW82949.1] [location=73..10251]
GQ868510.1_cds_ACW82950.1_1 [protein=polyprotein] [protein_id=ACW82950.1] [location=73..10251]
GQ868511.1_cds_ACW82951.1_1 [protein=polyprotein] [protein_id=ACW82951.1] [location=69..10247]
GQ868512.1_cds_ACW82952.1_1 [protein=polyprotein] [protein_id=ACW82952.1] [location=63..10241]
GQ868513.1_cds_ACW82953.1_1 [protein=polyprotein] [protein_id=ACW82953.1] [location=73..10251]
GQ868514.1_cds_ACW82954.1_1 [protein=polyprotein] [protein_id=ACW82954.1] [location=73..10251]
GQ868517.1_cds_ACW82957.1_1 [protein=polyprotein] [protein_id=ACW82957.1] [location=73..10251]
GQ868518.1_cds_ACW82958.1_1 [protein=polyprotein] [protein_id=ACW82958.1] [location=73..10251]
GQ868519.1_cds_ACW82959.1_1 [protein=polyprotein] [protein_id=ACW82959.1] [location=73..10251]
GQ868520.1_cds_ACW82960.1_1 [protein=polyprotein] [protein_id=ACW82960.1] [location=73..10251]
GQ868521.1_cds_ACW82961.1_1 [protein=polyprotein] [protein_id=ACW82961.1] [location=73..10251]
GQ868522.1_cds_ACW82962.1_1 [protein=polyprotein] [protein_id=ACW82962.1] [location=73..10251]
GQ868523.1_cds_ACW82963.1_1 [protein=polyprotein] [protein_id=ACW82963.1] [location=73..10251]
GQ868524.1_cds_ACW82964.1_1 [protein=polyprotein] [protein_id=ACW82964.1] [location=73..10251]
GQ868525.1_cds_ACW82965.1_1 [protein=polyprotein] [protein_id=ACW82965.1] [location=73..10251]
GQ868526.1_cds_ACW82966.1_1 [protein=polyprotein] [protein_id=ACW82966.1] [location=73..10251]
GQ868527.1_cds_ACW82967.1_1 [protein=polyprotein] [protein_id=ACW82967.1] [location=73..10251]
GQ868528.1_cds_ACW82968.1_1 [protein=polyprotein] [protein_id=ACW82968.1] [location=73..10251]
GQ868529.1_cds_ACW82969.1_1 [protein=polyprotein] [protein_id=ACW82969.1] [location=73..10251]
GQ868530.1_cds_ACW82970.1_1 [protein=polyprotein] [protein_id=ACW82970.1] [location=73..10251]
GQ868531.1_cds_ACW82971.1_1 [protein=polyprotein] [protein_id=ACW82971.1] [location=73..10251]
GQ868532.1_cds_ACW82972.1_1 [protein=polyprotein] [protein_id=ACW82972.1] [location=73..10251]
GQ868533.1_cds_ACW82973.1_1 [protein=polyprotein] [protein_id=ACW82973.1] [location=73..10251]
GQ868534.1_cds_ACW82974.1_1 [protein=polyprotein] [protein_id=ACW82974.1] [location=73..10251]
GQ868535.1_cds_ACW82975.1_1 [protein=polyprotein] [protein_id=ACW82975.1] [location=73..10251]
GQ868559.1_cds_ACW82987.1_1 [protein=polyprotein] [protein_id=ACW82987.1] [location=73..10251]
GQ868560.1_cds_ACW82988.1_1 [protein=polyprotein] [protein_id=ACW82988.1] [location=73..10251]
GQ868561.1_cds_ACW82989.1_1 [protein=polyprotein] [protein_id=ACW82989.1] [location=62..10240]
GQ868562.1_cds_ACW82990.1_1 [protein=polyprotein] [protein_id=ACW82990.1] [location=63..10241]
GQ868563.1_cds_ACW82991.1_1 [protein=polyprotein] [protein_id=ACW82991.1] [location=59..10237]
GQ868564.1_cds_ACW82992.1_1 [protein=polyprotein] [protein_id=ACW82992.1] [location=73..10251]
GQ868565.1_cds_ACW82993.1_1 [protein=polyprotein] [protein_id=ACW82993.1] [location=73..10251]
GQ868566.1_cds_ACW82994.1_1 [protein=polyprotein] [protein_id=ACW82994.1] [location=73..10251]
GQ868567.1_cds_ACW82995.1_1 [protein=polyprotein] [protein_id=ACW82995.1] [location=73..10251]
GQ868568.1_cds_ACW82996.1_1 [protein=polyprotein] [protein_id=ACW82996.1] [location=73..10251]
GQ868569.1_cds_ACW82997.1_1 [protein=polyprotein] [protein_id=ACW82997.1] [location=73..10251]
GQ868570.1_cds_ACW82998.1_1 [protein=polyprotein] [protein_id=ACW82998.1] [location=73..10251]
GQ868601.1_cds_ACW82891.1_1 [protein=polyprotein] [protein_id=ACW82891.1] [location=73..10251]
GQ868602.1_cds_ACW82892.1_1 [protein=polyprotein] [protein_id=ACW82892.1] [location=60..10238]
GQ868605.1_cds_ACW82895.1_1 [protein=polyprotein] [protein_id=ACW82895.1] [location=73..10251]
GQ868606.1_cds_ACW82896.1_1 [protein=polyprotein] [protein_id=ACW82896.1] [location=73..10251]
GQ868607.1_cds_ACW82897.1_1 [protein=polyprotein] [protein_id=ACW82897.1] [location=73..10251]
GQ868608.1_cds_ACW82898.1_1 [protein=polyprotein] [protein_id=ACW82898.1] [location=73..10251]
GQ868609.1_cds_ACW82899.1_1 [protein=polyprotein] [protein_id=ACW82899.1] [location=73..10251]
GQ868610.1_cds_ACW82900.1_1 [protein=polyprotein] [protein_id=ACW82900.1] [location=73..10251]
GQ868611.1_cds_ACW82901.1_1 [protein=polyprotein] [protein_id=ACW82901.1] [location=73..10251]
GQ868612.1_cds_ACW82902.1_1 [protein=polyprotein] [protein_id=ACW82902.1] [location=73..10251]
GQ868613.1_cds_ACW82903.1_1 [protein=polyprotein] [protein_id=ACW82903.1] [location=62..10240]
GQ868614.1_cds_ACW82904.1_1 [protein=polyprotein] [protein_id=ACW82904.1] [location=73..10251]
GQ868615.1_cds_ACW82905.1_1 [protein=polyprotein] [protein_id=ACW82905.1] [location=73..10251]
GQ868618.1_cds_ACW82906.1_1 [protein=polyprotein] [protein_id=ACW82906.1] [location=73..10251]
GQ868619.1_cds_ACW82907.1_1 [protein=polyprotein] [protein_id=ACW82907.1] [location=73..10251]
GQ868630.1_cds_ACW82918.1_1 [protein=polyprotein] [protein_id=ACW82918.1] [location=71..10249]
GQ868632.1_cds_ACW82920.1_1 [protein=polyprotein] [protein_id=ACW82920.1] [location=73..10251]
GQ868633.1_cds_ACW82921.1_1 [protein=polyprotein] [protein_id=ACW82921.1] [location=73..10251]
GQ868635.1_cds_ACW82923.1_1 [protein=polyprotein] [protein_id=ACW82923.1] [location=73..10251]
GQ868636.1_cds_ACW82924.1_1 [protein=polyprotein] [protein_id=ACW82924.1] [location=73..10251]
GQ868637.1_cds_ACW82925.1_1 [protein=polyprotein] [protein_id=ACW82925.1] [location=73..10251]
GQ868639.1_cds_ACW82927.1_1 [protein=polyprotein] [protein_id=ACW82927.1] [location=73..10251]
GQ199771.1_cds_ACS31905.1_1 [protein=polyprotein] [protein_id=ACS31905.1] [location=73..10251]
GQ199772.1_cds_ACS31906.1_1 [protein=polyprotein] [protein_id=ACS31906.1] [location=73..10251]
GQ199773.1_cds_ACS31907.1_1 [protein=polyprotein] [protein_id=ACS31907.1] [location=59..10237]
GQ199774.1_cds_ACS31908.1_1 [protein=polyprotein] [protein_id=ACS31908.1] [location=73..10251]
GQ199775.1_cds_ACS31909.1_1 [protein=polyprotein] [protein_id=ACS31909.1] [location=73..10251]
GQ199776.1_cds_ACS31910.1_1 [protein=polyprotein] [protein_id=ACS31910.1] [location=59..10237]
GQ199777.1_cds_ACS31911.1_1 [protein=polyprotein] [protein_id=ACS31911.1] [location=73..10251]
GQ199778.1_cds_ACS31912.1_1 [protein=polyprotein] [protein_id=ACS31912.1] [location=73..10251]
GQ199779.1_cds_ACS31913.1_1 [protein=polyprotein] [protein_id=ACS31913.1] [location=73..10251]
GQ199780.1_cds_ACS31914.1_1 [protein=polyprotein] [protein_id=ACS31914.1] [location=73..10251]
GQ199781.1_cds_ACS31915.1_1 [protein=polyprotein] [protein_id=ACS31915.1] [location=73..10251]
GQ199782.1_cds_ACS31916.1_1 [protein=polyprotein] [protein_id=ACS31916.1] [location=73..10251]
GQ199783.1_cds_ACS31917.1_1 [protein=polyprotein] [protein_id=ACS31917.1] [location=73..10251]
GQ199784.1_cds_ACS31918.1_1 [protein=polyprotein] [protein_id=ACS31918.1] [location=73..10251]
GQ199785.1_cds_ACS31919.1_1 [protein=polyprotein] [protein_id=ACS31919.1] [location=73..10251]
GQ199786.1_cds_ACS31920.1_1 [protein=polyprotein] [protein_id=ACS31920.1] [location=73..10251]
GQ199787.1_cds_ACS31921.1_1 [protein=polyprotein] [protein_id=ACS31921.1] [location=73..10251]
GQ199788.1_cds_ACS31922.1_1 [protein=polyprotein] [protein_id=ACS31922.1] [location=73..10251]
GQ199789.1_cds_ACS31923.1_1 [protein=polyprotein] [protein_id=ACS31923.1] [location=73..10251]
GQ199790.1_cds_ACS31924.1_1 [protein=polyprotein] [protein_id=ACS31924.1] [location=73..10251]
GQ199791.1_cds_ACS31925.1_1 [protein=polyprotein] [protein_id=ACS31925.1] [location=73..10251]
GQ199792.1_cds_ACS31926.1_1 [protein=polyprotein] [protein_id=ACS31926.1] [location=73..10251]
GQ199793.1_cds_ACS31927.1_1 [protein=polyprotein] [protein_id=ACS31927.1] [location=73..10251]
GQ199794.1_cds_ACS31928.1_1 [protein=polyprotein] [protein_id=ACS31928.1] [location=73..10251]
GQ199795.1_cds_ACS31929.1_1 [protein=polyprotein] [protein_id=ACS31929.1] [location=73..10251]
GQ199796.1_cds_ACS31930.1_1 [protein=polyprotein] [protein_id=ACS31930.1] [location=73..10251]
GQ199797.1_cds_ACS31931.1_1 [protein=polyprotein] [protein_id=ACS31931.1] [location=73..10251]
GQ199798.1_cds_ACS31932.1_1 [protein=polyprotein] [protein_id=ACS31932.1] [location=73..10251]
GQ199799.1_cds_ACS31933.1_1 [protein=polyprotein] [protein_id=ACS31933.1] [location=73..10251]
GQ199800.1_cds_ACS31934.1_1 [protein=polyprotein] [protein_id=ACS31934.1] [location=73..10251]
GQ199801.1_cds_ACS31935.1_1 [protein=polyprotein] [protein_id=ACS31935.1] [location=73..10251]
GQ199802.1_cds_ACS31936.1_1 [protein=polyprotein] [protein_id=ACS31936.1] [location=73..10251]
GQ199803.1_cds_ACS31937.1_1 [protein=polyprotein] [protein_id=ACS31937.1] [location=73..10251]
GQ199804.1_cds_ACS31938.1_1 [protein=polyprotein] [protein_id=ACS31938.1] [location=62..10240]
GQ199805.1_cds_ACS31939.1_1 [protein=polyprotein] [protein_id=ACS31939.1] [location=73..10251]
GQ199806.1_cds_ACS31940.1_1 [protein=polyprotein] [protein_id=ACS31940.1] [location=72..10250]
GQ199807.1_cds_ACS31941.1_1 [protein=polyprotein] [protein_id=ACS31941.1] [location=73..10251]
GQ199808.1_cds_ACS31942.1_1 [protein=polyprotein] [protein_id=ACS31942.1] [location=73..10251]
GQ199809.1_cds_ACS31943.1_1 [protein=polyprotein] [protein_id=ACS31943.1] [location=73..10251]
GQ199810.1_cds_ACS31944.1_1 [protein=polyprotein] [protein_id=ACS31944.1] [location=73..10251]
GQ199811.1_cds_ACS31945.1_1 [protein=polyprotein] [protein_id=ACS31945.1] [location=73..10251]
GQ199812.1_cds_ACS31946.1_1 [protein=polyprotein] [protein_id=ACS31946.1] [location=73..10251]
GQ199813.1_cds_ACS31947.1_1 [protein=polyprotein] [protein_id=ACS31947.1] [location=73..10251]
GQ199814.1_cds_ACS31948.1_1 [protein=polyprotein] [protein_id=ACS31948.1] [location=73..10251]
GQ199815.1_cds_ACS31949.1_1 [protein=polyprotein] [protein_id=ACS31949.1] [location=73..10251]
GQ199816.1_cds_ACS31950.1_1 [protein=polyprotein] [protein_id=ACS31950.1] [location=73..10251]
GQ199817.1_cds_ACS31951.1_1 [protein=polyprotein] [protein_id=ACS31951.1] [location=73..10251]
GQ199818.1_cds_ACS31952.1_1 [protein=polyprotein] [protein_id=ACS31952.1] [location=73..10251]
GQ199819.1_cds_ACS31953.1_1 [protein=polyprotein] [protein_id=ACS31953.1] [location=73..10251]
GQ199820.1_cds_ACS31954.1_1 [protein=polyprotein] [protein_id=ACS31954.1] [location=73..10251]
GQ199821.1_cds_ACS31955.1_1 [protein=polyprotein] [protein_id=ACS31955.1] [location=73..10251]
GQ199822.1_cds_ACS31956.1_1 [protein=polyprotein] [protein_id=ACS31956.1] [location=73..10251]
GQ199823.1_cds_ACS31957.1_1 [protein=polyprotein] [protein_id=ACS31957.1] [location=58..10236]
GQ199824.1_cds_ACS31958.1_1 [protein=polyprotein] [protein_id=ACS31958.1] [location=73..10251]
GQ199825.1_cds_ACS31959.1_1 [protein=polyprotein] [protein_id=ACS31959.1] [location=73..10251]
GQ199826.1_cds_ACS31960.1_1 [protein=polyprotein] [protein_id=ACS31960.1] [location=73..10251]
GQ199827.1_cds_ACS31961.1_1 [protein=polyprotein] [protein_id=ACS31961.1] [location=59..10237]
GQ199828.1_cds_ACS31962.1_1 [protein=polyprotein] [protein_id=ACS31962.1] [location=73..10251]
GQ199829.1_cds_ACS31963.1_1 [protein=polyprotein] [protein_id=ACS31963.1] [location=73..10251]
GQ199830.1_cds_ACS31964.1_1 [protein=polyprotein] [protein_id=ACS31964.1] [location=73..10251]
GQ199831.1_cds_ACS31965.1_1 [protein=polyprotein] [protein_id=ACS31965.1] [location=73..10251]
GQ199832.1_cds_ACS31966.1_1 [protein=polyprotein] [protein_id=ACS31966.1] [location=73..10251]
GQ199833.1_cds_ACS31967.1_1 [protein=polyprotein] [protein_id=ACS31967.1] [location=73..10251]
GQ199834.1_cds_ACS31968.1_1 [protein=polyprotein] [protein_id=ACS31968.1] [location=59..10237]
GQ199835.1_cds_ACS31969.1_1 [protein=polyprotein] [protein_id=ACS31969.1] [location=73..10251]
GQ199836.1_cds_ACS31970.1_1 [protein=polyprotein] [protein_id=ACS31970.1] [location=73..10251]
GQ199837.1_cds_ACS31971.1_1 [protein=polyprotein] [protein_id=ACS31971.1] [location=73..10251]
GQ199838.1_cds_ACS31972.1_1 [protein=polyprotein] [protein_id=ACS31972.1] [location=73..10251]
GQ199839.1_cds_ACS31973.1_1 [protein=polyprotein] [protein_id=ACS31973.1] [location=73..10251]
GQ199840.1_cds_ACS31974.1_1 [protein=polyprotein] [protein_id=ACS31974.1] [location=73..10251]
GQ199841.1_cds_ACS31975.1_1 [protein=polyprotein] [protein_id=ACS31975.1] [location=73..10251]
GQ199842.1_cds_ACS31976.1_1 [protein=polyprotein] [protein_id=ACS31976.1] [location=73..10251]
GQ199843.1_cds_ACS31977.1_1 [protein=polyprotein] [protein_id=ACS31977.1] [location=73..10251]
GQ199844.1_cds_ACS31978.1_1 [protein=polyprotein] [protein_id=ACS31978.1] [location=73..10251]
GQ199845.1_cds_ACS31979.1_1 [protein=polyprotein] [protein_id=ACS31979.1] [location=73..10251]
GQ199846.1_cds_ACS31980.1_1 [protein=polyprotein] [protein_id=ACS31980.1] [location=73..10251]
GQ199847.1_cds_ACS31981.1_1 [protein=polyprotein] [protein_id=ACS31981.1] [location=73..10251]
GQ199848.1_cds_ACS31982.1_1 [protein=polyprotein] [protein_id=ACS31982.1] [location=73..10251]
GQ199849.1_cds_ACS31983.1_1 [protein=polyprotein] [protein_id=ACS31983.1] [location=56..10234]
GQ199850.1_cds_ACS31984.1_1 [protein=polyprotein] [protein_id=ACS31984.1] [location=73..10251]
GQ199851.1_cds_ACS31985.1_1 [protein=polyprotein] [protein_id=ACS31985.1] [location=73..10251]
GQ199852.1_cds_ACS31986.1_1 [protein=polyprotein] [protein_id=ACS31986.1] [location=73..10251]
GQ199853.1_cds_ACS31987.1_1 [protein=polyprotein] [protein_id=ACS31987.1] [location=73..10251]
GQ199854.1_cds_ACS31988.1_1 [protein=polyprotein] [protein_id=ACS31988.1] [location=73..10251]
GQ199855.1_cds_ACS31989.1_1 [protein=polyprotein] [protein_id=ACS31989.1] [location=73..10251]
GQ199856.1_cds_ACS31990.1_1 [protein=polyprotein] [protein_id=ACS31990.1] [location=73..10251]
GQ199857.1_cds_ACS31991.1_1 [protein=polyprotein] [protein_id=ACS31991.1] [location=73..10251]
GQ199858.1_cds_ACS31992.1_1 [protein=polyprotein] [protein_id=ACS31992.1] [location=73..10251]
GQ199859.1_cds_ACS31993.1_1 [protein=polyprotein] [protein_id=ACS31993.1] [location=73..10251]
GQ199867.1_cds_ACS32001.1_1 [protein=polyprotein] [protein_id=ACS32001.1] [location=73..10251]
GQ199872.1_cds_ACS32006.1_1 [protein=polyprotein] [protein_id=ACS32006.1] [location=73..10251]
GQ199873.1_cds_ACS32007.1_1 [protein=polyprotein] [protein_id=ACS32007.1] [location=73..10251]
GQ199875.1_cds_ACS32009.1_1 [protein=polyprotein] [protein_id=ACS32009.1] [location=73..10251]
GQ199877.1_cds_ACS32011.1_1 [protein=polyprotein] [protein_id=ACS32011.1] [location=73..10251]
FJ461320.1_cds_ACQ44313.1_1 [protein=polyprotein] [protein_id=ACQ44313.1] [location=73..10251]
FJ461328.1_cds_ACQ44314.1_1 [protein=polyprotein] [protein_id=ACQ44314.1] [location=73..10251]
FJ859029.1_cds_ACQ44316.1_1 [protein=polyprotein] [protein_id=ACQ44316.1] [location=59..10237]
FJ873809.1_cds_ACQ44318.1_1 [protein=polyprotein] [protein_id=ACQ44318.1] [location=73..10251]
FJ873810.1_cds_ACQ44319.1_1 [protein=polyprotein] [protein_id=ACQ44319.1] [location=73..10251]
FJ873814.1_cds_ACQ44323.1_1 [protein=polyprotein] [protein_id=ACQ44323.1] [location=57..10235]
FJ882515.1_cds_ACQ44324.1_1 [protein=polyprotein] [protein_id=ACQ44324.1] [location=73..10251]
FJ882516.1_cds_ACQ44325.1_1 [protein=polyprotein] [protein_id=ACQ44325.1] [location=73..10251]
FJ882517.1_cds_ACQ44326.1_1 [protein=polyprotein] [protein_id=ACQ44326.1] [location=73..10251]
FJ882518.1_cds_ACQ44327.1_1 [protein=polyprotein] [protein_id=ACQ44327.1] [location=73..10251]
FJ882519.1_cds_ACQ44328.1_1 [protein=polyprotein] [protein_id=ACQ44328.1] [location=73..10251]
FJ882520.1_cds_ACQ44329.1_1 [protein=polyprotein] [protein_id=ACQ44329.1] [location=73..10251]
FJ882521.1_cds_ACQ44330.1_1 [protein=polyprotein] [protein_id=ACQ44330.1] [location=73..10251]
FJ882522.1_cds_ACQ44331.1_1 [protein=polyprotein] [protein_id=ACQ44331.1] [location=73..10251]
FJ882523.1_cds_ACQ44332.1_1 [protein=polyprotein] [protein_id=ACQ44332.1] [location=73..10251]
FJ882524.1_cds_ACQ44333.1_1 [protein=polyprotein] [protein_id=ACQ44333.1] [location=73..10251]
FJ882525.1_cds_ACQ44334.1_1 [protein=polyprotein] [protein_id=ACQ44334.1] [location=73..10251]
FJ882526.1_cds_ACQ44335.1_1 [protein=polyprotein] [protein_id=ACQ44335.1] [location=73..10251]
FJ882527.1_cds_ACQ44336.1_1 [protein=polyprotein] [protein_id=ACQ44336.1] [location=73..10251]
FJ882528.1_cds_ACQ44337.1_1 [protein=polyprotein] [protein_id=ACQ44337.1] [location=73..10251]
FJ882529.1_cds_ACQ44338.1_1 [protein=polyprotein] [protein_id=ACQ44338.1] [location=73..10251]
FJ882530.1_cds_ACQ44339.1_1 [protein=polyprotein] [protein_id=ACQ44339.1] [location=73..10251]
FJ882531.1_cds_ACQ44340.1_1 [protein=polyprotein] [protein_id=ACQ44340.1] [location=73..10251]
FJ882532.1_cds_ACQ44341.1_1 [protein=polyprotein] [protein_id=ACQ44341.1] [location=73..10251]
FJ882533.1_cds_ACQ44342.1_1 [protein=polyprotein] [protein_id=ACQ44342.1] [location=73..10251]
FJ882534.1_cds_ACQ44343.1_1 [protein=polyprotein] [protein_id=ACQ44343.1] [location=73..10251]
FJ882535.1_cds_ACQ44344.1_1 [protein=polyprotein] [protein_id=ACQ44344.1] [location=73..10251]
FJ882536.1_cds_ACQ44345.1_1 [protein=polyprotein] [protein_id=ACQ44345.1] [location=73..10251]
FJ882537.1_cds_ACQ44346.1_1 [protein=polyprotein] [protein_id=ACQ44346.1] [location=73..10251]
FJ882538.1_cds_ACQ44347.1_1 [protein=polyprotein] [protein_id=ACQ44347.1] [location=73..10251]
FJ882539.1_cds_ACQ44348.1_1 [protein=polyprotein] [protein_id=ACQ44348.1] [location=73..10251]
FJ882540.1_cds_ACQ44349.1_1 [protein=polyprotein] [protein_id=ACQ44349.1] [location=73..10251]
FJ882541.1_cds_ACQ44350.1_1 [protein=polyprotein] [protein_id=ACQ44350.1] [location=73..10251]
FJ882542.1_cds_ACQ44351.1_1 [protein=polyprotein] [protein_id=ACQ44351.1] [location=73..10251]
FJ882543.1_cds_ACQ44352.1_1 [protein=polyprotein] [protein_id=ACQ44352.1] [location=73..10251]
FJ882544.1_cds_ACQ44353.1_1 [protein=polyprotein] [protein_id=ACQ44353.1] [location=56..10234]
FJ882545.1_cds_ACQ44354.1_1 [protein=polyprotein] [protein_id=ACQ44354.1] [location=73..10251]
FJ882546.1_cds_ACQ44355.1_1 [protein=polyprotein] [protein_id=ACQ44355.1] [location=73..10248]
FJ882547.1_cds_ACQ44356.1_1 [protein=polyprotein] [protein_id=ACQ44356.1] [location=59..10231]
FJ882548.1_cds_ACQ44357.1_1 [protein=polyprotein] [protein_id=ACQ44357.1] [location=73..10251]
FJ882549.1_cds_ACQ44358.1_1 [protein=polyprotein] [protein_id=ACQ44358.1] [location=63..10241]
FJ882550.1_cds_ACQ44359.1_1 [protein=polyprotein] [protein_id=ACQ44359.1] [location=73..10251]
FJ882551.1_cds_ACQ44360.1_1 [protein=polyprotein] [protein_id=ACQ44360.1] [location=73..10251]
FJ882552.1_cds_ACQ44361.1_1 [protein=polyprotein] [protein_id=ACQ44361.1] [location=73..10251]
FJ882553.1_cds_ACQ44362.1_1 [protein=polyprotein] [protein_id=ACQ44362.1] [location=63..10241]
FJ882554.1_cds_ACQ44363.1_1 [protein=polyprotein] [protein_id=ACQ44363.1] [location=59..10237]
FJ882555.1_cds_ACQ44364.1_1 [protein=polyprotein] [protein_id=ACQ44364.1] [location=61..10239]
FJ882556.1_cds_ACQ44365.1_1 [protein=polyprotein] [protein_id=ACQ44365.1] [location=73..10251]
FJ882557.1_cds_ACQ44366.1_1 [protein=polyprotein] [protein_id=ACQ44366.1] [location=71..10249]
FJ882558.1_cds_ACQ44367.1_1 [protein=polyprotein] [protein_id=ACQ44367.1] [location=73..10251]
FJ882559.1_cds_ACQ44368.1_1 [protein=polyprotein] [protein_id=ACQ44368.1] [location=73..10251]
FJ882560.1_cds_ACQ44369.1_1 [protein=polyprotein] [protein_id=ACQ44369.1] [location=73..10251]
FJ882561.1_cds_ACQ44370.1_1 [protein=polyprotein] [protein_id=ACQ44370.1] [location=59..10237]
FJ882562.1_cds_ACQ44371.1_1 [protein=polyprotein] [protein_id=ACQ44371.1] [location=59..10237]
FJ882563.1_cds_ACQ44372.1_1 [protein=polyprotein] [protein_id=ACQ44372.1] [location=57..10235]
FJ882564.1_cds_ACQ44373.1_1 [protein=polyprotein] [protein_id=ACQ44373.1] [location=67..10245]
FJ882565.1_cds_ACQ44374.1_1 [protein=polyprotein] [protein_id=ACQ44374.1] [location=59..10237]
FJ882566.1_cds_ACQ44375.1_1 [protein=polyprotein] [protein_id=ACQ44375.1] [location=73..10251]
FJ882567.1_cds_ACQ44376.1_1 [protein=polyprotein] [protein_id=ACQ44376.1] [location=73..10251]
FJ882568.1_cds_ACQ44377.1_1 [protein=polyprotein] [protein_id=ACQ44377.1] [location=73..10251]
FJ882569.1_cds_ACQ44378.1_1 [protein=polyprotein] [protein_id=ACQ44378.1] [location=73..10251]
FJ882570.1_cds_ACQ44379.1_1 [protein=polyprotein] [protein_id=ACQ44379.1] [location=73..10251]
FJ882579.1_cds_ACQ44388.1_1 [protein=polyprotein] [protein_id=ACQ44388.1] [location=57..10235]
FJ898371.1_cds_ACQ44410.1_1 [protein=polyprotein] [protein_id=ACQ44410.1] [location=57..10235]
FJ898372.1_cds_ACQ44411.1_1 [protein=polyprotein] [protein_id=ACQ44411.1] [location=73..10251]
FJ898373.1_cds_ACQ44412.1_1 [protein=polyprotein] [protein_id=ACQ44412.1] [location=63..10241]
FJ898374.1_cds_ACQ44413.1_1 [protein=polyprotein] [protein_id=ACQ44413.1] [location=57..10235]
FJ898375.1_cds_ACQ44414.1_1 [protein=polyprotein] [protein_id=ACQ44414.1] [location=73..10251]
FJ898376.1_cds_ACQ44415.1_1 [protein=polyprotein] [protein_id=ACQ44415.1] [location=73..10251]
FJ898377.1_cds_ACQ44416.1_1 [protein=polyprotein] [protein_id=ACQ44416.1] [location=73..10251]
FJ898378.1_cds_ACQ44417.1_1 [protein=polyprotein] [protein_id=ACQ44417.1] [location=60..10238]
FJ898379.1_cds_ACQ44418.1_1 [protein=polyprotein] [protein_id=ACQ44418.1] [location=57..10235]
FJ898380.1_cds_ACQ44419.1_1 [protein=polyprotein] [protein_id=ACQ44419.1] [location=59..10237]
FJ898381.1_cds_ACQ44420.1_1 [protein=polyprotein] [protein_id=ACQ44420.1] [location=63..10241]
FJ898382.1_cds_ACQ44421.1_1 [protein=polyprotein] [protein_id=ACQ44421.1] [location=73..10251]
FJ898383.1_cds_ACQ44422.1_1 [protein=polyprotein] [protein_id=ACQ44422.1] [location=73..10251]
FJ898384.1_cds_ACQ44423.1_1 [protein=polyprotein] [protein_id=ACQ44423.1] [location=73..10251]
FJ898385.1_cds_ACQ44424.1_1 [protein=polyprotein] [protein_id=ACQ44424.1] [location=73..10251]
FJ898386.1_cds_ACQ44425.1_1 [protein=polyprotein] [protein_id=ACQ44425.1] [location=73..10251]
FJ898387.1_cds_ACQ44426.1_1 [protein=polyprotein] [protein_id=ACQ44426.1] [location=59..10237]
FJ898388.1_cds_ACQ44427.1_1 [protein=polyprotein] [protein_id=ACQ44427.1] [location=73..10251]
FJ898389.1_cds_ACQ44428.1_1 [protein=polyprotein] [protein_id=ACQ44428.1] [location=73..10251]
FJ898390.1_cds_ACQ44429.1_1 [protein=polyprotein] [protein_id=ACQ44429.1] [location=59..10237]
FJ898391.1_cds_ACQ44430.1_1 [protein=polyprotein] [protein_id=ACQ44430.1] [location=73..10251]
FJ898392.1_cds_ACQ44431.1_1 [protein=polyprotein] [protein_id=ACQ44431.1] [location=73..10251]
FJ898393.1_cds_ACQ44432.1_1 [protein=polyprotein] [protein_id=ACQ44432.1] [location=70..10248]
FJ898394.1_cds_ACQ44433.1_1 [protein=polyprotein] [protein_id=ACQ44433.1] [location=60..10238]
FJ898395.1_cds_ACQ44434.1_1 [protein=polyprotein] [protein_id=ACQ44434.1] [location=64..10242]
FJ898396.1_cds_ACQ44435.1_1 [protein=polyprotein] [protein_id=ACQ44435.1] [location=73..10251]
FJ898397.1_cds_ACQ44436.1_1 [protein=polyprotein] [protein_id=ACQ44436.1] [location=63..10241]
FJ898398.1_cds_ACQ44437.1_1 [protein=polyprotein] [protein_id=ACQ44437.1] [location=73..10251]
FJ898399.1_cds_ACQ44438.1_1 [protein=polyprotein] [protein_id=ACQ44438.1] [location=73..10251]
FJ898400.1_cds_ACQ44439.1_1 [protein=polyprotein] [protein_id=ACQ44439.1] [location=73..10251]
FJ898401.1_cds_ACQ44440.1_1 [protein=polyprotein] [protein_id=ACQ44440.1] [location=73..10251]
FJ898402.1_cds_ACQ44441.1_1 [protein=polyprotein] [protein_id=ACQ44441.1] [location=73..10251]
FJ898403.1_cds_ACQ44442.1_1 [protein=polyprotein] [protein_id=ACQ44442.1] [location=73..10251]
FJ898404.1_cds_ACQ44443.1_1 [protein=polyprotein] [protein_id=ACQ44443.1] [location=73..10251]
FJ898405.1_cds_ACQ44444.1_1 [protein=polyprotein] [protein_id=ACQ44444.1] [location=62..10240]
FJ898406.1_cds_ACQ44445.1_1 [protein=polyprotein] [protein_id=ACQ44445.1] [location=73..10251]
FJ898407.1_cds_ACQ44446.1_1 [protein=polyprotein] [protein_id=ACQ44446.1] [location=55..10233]
FJ898408.1_cds_ACQ44447.1_1 [protein=polyprotein] [protein_id=ACQ44447.1] [location=73..10251]
FJ898409.1_cds_ACQ44448.1_1 [protein=polyprotein] [protein_id=ACQ44448.1] [location=73..10251]
FJ898410.1_cds_ACQ44449.1_1 [protein=polyprotein] [protein_id=ACQ44449.1] [location=73..10251]
FJ898411.1_cds_ACQ44450.1_1 [protein=polyprotein] [protein_id=ACQ44450.1] [location=73..10251]
FJ898412.1_cds_ACQ44451.1_1 [protein=polyprotein] [protein_id=ACQ44451.1] [location=55..10233]
FJ898413.1_cds_ACQ44452.1_1 [protein=polyprotein] [protein_id=ACQ44452.1] [location=73..10251]
FJ898414.1_cds_ACQ44453.1_1 [protein=polyprotein] [protein_id=ACQ44453.1] [location=62..10240]
FJ898415.1_cds_ACQ44454.1_1 [protein=polyprotein] [protein_id=ACQ44454.1] [location=57..10235]
FJ898416.1_cds_ACQ44455.1_1 [protein=polyprotein] [protein_id=ACQ44455.1] [location=73..10251]
FJ898417.1_cds_ACQ44456.1_1 [protein=polyprotein] [protein_id=ACQ44456.1] [location=73..10251]
FJ898418.1_cds_ACQ44457.1_1 [protein=polyprotein] [protein_id=ACQ44457.1] [location=66..10244]
FJ898419.1_cds_ACQ44458.1_1 [protein=polyprotein] [protein_id=ACQ44458.1] [location=59..10237]
FJ898420.1_cds_ACQ44459.1_1 [protein=polyprotein] [protein_id=ACQ44459.1] [location=59..10237]
FJ898421.1_cds_ACQ44460.1_1 [protein=polyprotein] [protein_id=ACQ44460.1] [location=73..10251]
FJ898422.1_cds_ACQ44461.1_1 [protein=polyprotein] [protein_id=ACQ44461.1] [location=73..10251]
FJ898423.1_cds_ACQ44462.1_1 [protein=polyprotein] [protein_id=ACQ44462.1] [location=62..10240]
FJ898424.1_cds_ACQ44463.1_1 [protein=polyprotein] [protein_id=ACQ44463.1] [location=73..10251]
FJ898425.1_cds_ACQ44464.1_1 [protein=polyprotein] [protein_id=ACQ44464.1] [location=73..10251]
FJ898426.1_cds_ACQ44465.1_1 [protein=polyprotein] [protein_id=ACQ44465.1] [location=73..10251]
FJ898427.1_cds_ACQ44466.1_1 [protein=polyprotein] [protein_id=ACQ44466.1] [location=73..10251]
FJ898428.1_cds_ACQ44467.1_1 [protein=polyprotein] [protein_id=ACQ44467.1] [location=73..10251]
FJ898429.1_cds_ACQ44468.1_1 [protein=polyprotein] [protein_id=ACQ44468.1] [location=73..10251]
FJ898430.1_cds_ACQ44469.1_1 [protein=polyprotein] [protein_id=ACQ44469.1] [location=56..10234]
FJ898431.1_cds_ACQ44470.1_1 [protein=polyprotein] [protein_id=ACQ44470.1] [location=73..10251]
FJ898433.1_cds_ACQ44472.1_1 [protein=polyprotein] [protein_id=ACQ44472.1] [location=73..10251]
FJ898437.1_cds_ACQ44476.1_1 [protein=polyprotein] [protein_id=ACQ44476.1] [location=61..10239]
FJ898448.1_cds_ACQ44487.1_1 [protein=polyprotein] [protein_id=ACQ44487.1] [location=59..10237]
FJ906728.1_cds_ACQ44534.1_1 [protein=polyprotein] [protein_id=ACQ44534.1] [location=59..10237]
FJ906963.1_cds_ACQ44521.1_1 [protein=polyprotein] [protein_id=ACQ44521.1] [location=58..10236]
FJ906964.1_cds_ACQ44522.1_1 [protein=polyprotein] [protein_id=ACQ44522.1] [location=55..10233]
FJ906965.1_cds_ACQ44523.1_1 [protein=polyprotein] [protein_id=ACQ44523.1] [location=59..10237]
FJ810415.1_cds_ACO06138.1_1 [protein=polyprotein] [protein_id=ACO06138.1] [location=73..10251]
FJ810419.1_cds_ACO06142.1_1 [protein=polyprotein] [protein_id=ACO06142.1] [location=73..10251]
FJ850068.1_cds_ACO06148.1_1 [protein=polyprotein] [protein_id=ACO06148.1] [location=59..10237]
FJ850069.1_cds_ACO06149.1_1 [protein=polyprotein] [protein_id=ACO06149.1] [location=59..10237]
FJ850070.1_cds_ACO06150.1_1 [protein=polyprotein] [protein_id=ACO06150.1] [location=60..10238]
FJ850071.1_cds_ACO06151.1_1 [protein=polyprotein] [protein_id=ACO06151.1] [location=66..10244]
FJ850073.1_cds_ACO06153.1_1 [protein=polyprotein] [protein_id=ACO06153.1] [location=73..10251]
FJ850075.1_cds_ACO06155.1_1 [protein=polyprotein] [protein_id=ACO06155.1] [location=73..10251]
FJ850077.1_cds_ACO06157.1_1 [protein=polyprotein] [protein_id=ACO06157.1] [location=73..10251]
FJ850081.1_cds_ACO06161.1_1 [protein=polyprotein] [protein_id=ACO06161.1] [location=73..10251]
FJ850084.1_cds_ACO06164.1_1 [protein=polyprotein] [protein_id=ACO06164.1] [location=73..10251]
FJ850087.1_cds_ACO06167.1_1 [protein=polyprotein] [protein_id=ACO06167.1] [location=73..10251]
FJ850090.1_cds_ACO06170.1_1 [protein=polyprotein] [protein_id=ACO06170.1] [location=59..10237]
FJ850093.1_cds_ACO06173.1_1 [protein=polyprotein] [protein_id=ACO06173.1] [location=73..10251]
FJ850099.1_cds_ACO06203.1_1 [protein=polyprotein] [protein_id=ACO06203.1] [location=73..10251]
FJ850100.1_cds_ACO06204.1_1 [protein=polyprotein] [protein_id=ACO06204.1] [location=73..10251]
FJ850101.1_cds_ACO06205.1_1 [protein=polyprotein] [protein_id=ACO06205.1] [location=73..10251]
FJ850102.1_cds_ACO06206.1_1 [protein=polyprotein] [protein_id=ACO06206.1] [location=73..10251]
FJ850103.1_cds_ACO06207.1_1 [protein=polyprotein] [protein_id=ACO06207.1] [location=61..10239]
FJ850104.1_cds_ACO06208.1_1 [protein=polyprotein] [protein_id=ACO06208.1] [location=73..10251]
FJ850113.1_cds_ACO06175.1_1 [protein=polyprotein] [protein_id=ACO06175.1] [location=73..10251]
FJ850114.1_cds_ACO06176.1_1 [protein=polyprotein] [protein_id=ACO06176.1] [location=73..10251]
FJ687426.1_cds_ACN42673.1_1 [protein=polyprotein] [protein_id=ACN42673.1] [location=59..10237]
FJ687427.1_cds_ACN42674.1_1 [protein=polyprotein] [protein_id=ACN42674.1] [location=55..10233]
FJ687428.1_cds_ACN42675.1_1 [protein=polyprotein] [protein_id=ACN42675.1] [location=60..10238]
FJ687429.1_cds_ACN42676.1_1 [protein=polyprotein] [protein_id=ACN42676.1] [location=59..10237]
FJ687430.1_cds_ACN42677.1_1 [protein=polyprotein] [protein_id=ACN42677.1] [location=59..10237]
FJ687431.1_cds_ACN42678.1_1 [protein=polyprotein] [protein_id=ACN42678.1] [location=59..10237]
FJ687432.1_cds_ACN42679.1_1 [protein=polyprotein] [protein_id=ACN42679.1] [location=73..10251]
FJ687433.1_cds_ACN42680.1_1 [protein=polyprotein] [protein_id=ACN42680.1] [location=56..10234]
FJ744701.1_cds_ACN42697.1_1 [protein=polyprotein] [protein_id=ACN42697.1] [location=73..10251]
FJ744702.1_cds_ACN42698.1_1 [protein=polyprotein] [protein_id=ACN42698.1] [location=73..10251]
FJ432723.1_cds_ACL99126.1_1 [protein=polyprotein] [protein_id=ACL99126.1] [location=73..10251]
FJ432725.1_cds_ACL99127.1_1 [protein=polyprotein] [protein_id=ACL99127.1] [location=73..10251]
FJ432727.1_cds_ACL99129.1_1 [protein=polyprotein] [protein_id=ACL99129.1] [location=73..10251]
FJ432729.1_cds_ACL99131.1_1 [protein=polyprotein] [protein_id=ACL99131.1] [location=73..10251]
FJ432730.1_cds_ACL99132.1_1 [protein=polyprotein] [protein_id=ACL99132.1] [location=73..10251]
FJ432732.1_cds_ACL99134.1_1 [protein=polyprotein] [protein_id=ACL99134.1] [location=73..10251]
FJ432733.1_cds_ACL99135.1_1 [protein=polyprotein] [protein_id=ACL99135.1] [location=73..10251]
FJ432734.1_cds_ACL99136.1_1 [protein=polyprotein] [protein_id=ACL99136.1] [location=72..10250]
FJ432735.1_cds_ACL99137.1_1 [protein=polyprotein] [protein_id=ACL99137.1] [location=73..10251]
FJ432736.1_cds_ACL99138.1_1 [protein=polyprotein] [protein_id=ACL99138.1] [location=73..10251]
FJ432737.1_cds_ACL99139.1_1 [protein=polyprotein] [protein_id=ACL99139.1] [location=73..10251]
FJ432738.1_cds_ACL99140.1_1 [protein=polyprotein] [protein_id=ACL99140.1] [location=72..10250]
FJ432739.1_cds_ACL99141.1_1 [protein=polyprotein] [protein_id=ACL99141.1] [location=73..10251]
FJ432740.1_cds_ACL99142.1_1 [protein=polyprotein] [protein_id=ACL99142.1] [location=65..10243]
FJ432742.1_cds_ACL99144.1_1 [protein=polyprotein] [protein_id=ACL99144.1] [location=56..10234]
FJ432744.1_cds_ACL99146.1_1 [protein=polyprotein] [protein_id=ACL99146.1] [location=73..10251]
FJ432745.1_cds_ACL99147.1_1 [protein=polyprotein] [protein_id=ACL99147.1] [location=63..10241]
FJ432746.1_cds_ACL99148.1_1 [protein=polyprotein] [protein_id=ACL99148.1] [location=67..10245]
FJ432747.1_cds_ACL99149.1_1 [protein=polyprotein] [protein_id=ACL99149.1] [location=73..10251]
FJ432748.1_cds_ACL99150.1_1 [protein=polyprotein] [protein_id=ACL99150.1] [location=64..10242]
FJ432749.1_cds_ACL99151.1_1 [protein=polyprotein] [protein_id=ACL99151.1] [location=73..10251]
FJ461306.1_cds_ACL99153.1_1 [protein=polyprotein] [protein_id=ACL99153.1] [location=73..10251]
FJ461307.1_cds_ACL99154.1_1 [protein=polyprotein] [protein_id=ACL99154.1] [location=72..10250]
FJ461308.1_cds_ACL99155.1_1 [protein=polyprotein] [protein_id=ACL99155.1] [location=57..10235]
FJ461310.1_cds_ACL99157.1_1 [protein=polyprotein] [protein_id=ACL99157.1] [location=59..10237]
FJ461312.1_cds_ACL99159.1_1 [protein=polyprotein] [protein_id=ACL99159.1] [location=73..10251]
FJ461313.1_cds_ACL99160.1_1 [protein=polyprotein] [protein_id=ACL99160.1] [location=73..10251]
FJ461315.1_cds_ACL99162.1_1 [protein=polyprotein] [protein_id=ACL99162.1] [location=73..10251]
FJ461316.1_cds_ACL99163.1_1 [protein=polyprotein] [protein_id=ACL99163.1] [location=73..10251]
FJ461317.1_cds_ACL99164.1_1 [protein=polyprotein] [protein_id=ACL99164.1] [location=73..10251]
FJ461318.1_cds_ACL99165.1_1 [protein=polyprotein] [protein_id=ACL99165.1] [location=73..10251]
FJ461319.1_cds_ACL99166.1_1 [protein=polyprotein] [protein_id=ACL99166.1] [location=73..10251]
FJ461323.1_cds_ACL99169.1_1 [protein=polyprotein] [protein_id=ACL99169.1] [location=59..10237]
FJ461324.1_cds_ACL99170.1_1 [protein=polyprotein] [protein_id=ACL99170.1] [location=73..10251]
FJ461325.1_cds_ACL99171.1_1 [protein=polyprotein] [protein_id=ACL99171.1] [location=60..10238]
FJ461327.1_cds_ACL99173.1_1 [protein=polyprotein] [protein_id=ACL99173.1] [location=59..10237]
FJ461330.1_cds_ACL99175.1_1 [protein=polyprotein] [protein_id=ACL99175.1] [location=73..10251]
FJ461331.1_cds_ACL99176.1_1 [protein=polyprotein] [protein_id=ACL99176.1] [location=73..10251]
FJ461332.1_cds_ACL99177.1_1 [protein=polyprotein] [protein_id=ACL99177.1] [location=73..10251]
FJ461333.1_cds_ACL99178.1_1 [protein=polyprotein] [protein_id=ACL99178.1] [location=73..10251]
FJ461335.1_cds_ACL99180.1_1 [protein=polyprotein] [protein_id=ACL99180.1] [location=73..10251]
FJ461336.1_cds_ACL99181.1_1 [protein=polyprotein] [protein_id=ACL99181.1] [location=73..10251]
FJ461339.1_cds_ACL99184.1_1 [protein=polyprotein] [protein_id=ACL99184.1] [location=73..10251]
FJ461340.1_cds_ACL99185.1_1 [protein=polyprotein] [protein_id=ACL99185.1] [location=73..10251]
FJ461341.1_cds_ACL99186.1_1 [protein=polyprotein] [protein_id=ACL99186.1] [location=73..10251]
FJ547060.1_cds_ACL98977.1_1 [protein=polyprotein] [protein_id=ACL98977.1] [location=73..10251]
FJ547063.1_cds_ACL98980.1_1 [protein=polyprotein] [protein_id=ACL98980.1] [location=57..10235]
FJ547065.1_cds_ACL98982.1_1 [protein=polyprotein] [protein_id=ACL98982.1] [location=57..10235]
FJ547068.1_cds_ACL99015.1_1 [protein=polyprotein] [protein_id=ACL99015.1] [location=73..10251]
FJ547086.1_cds_ACL99002.1_1 [protein=polyprotein] [protein_id=ACL99002.1] [location=73..10251]
FJ547087.1_cds_ACL99003.1_1 [protein=polyprotein] [protein_id=ACL99003.1] [location=73..10251]
FJ547088.1_cds_ACL99016.1_1 [protein=polyprotein] [protein_id=ACL99016.1] [location=73..10251]
FJ547089.1_cds_ACL99017.1_1 [protein=polyprotein] [protein_id=ACL99017.1] [location=73..10251]
FJ562101.1_cds_ACL99008.1_1 [protein=polyprotein] [protein_id=ACL99008.1] [location=73..10251]
FJ562104.1_cds_ACL99011.1_1 [protein=polyprotein] [protein_id=ACL99011.1] [location=73..10251]
FJ562105.1_cds_ACL99012.1_1 [protein=polyprotein] [protein_id=ACL99012.1] [location=73..10251]
FJ562106.1_cds_ACL99013.1_1 [protein=polyprotein] [protein_id=ACL99013.1] [location=73..10251]
FJ639669.1_cds_ACL99187.1_1 [protein=polyprotein] [protein_id=ACL99187.1] [location=73..10251]
FJ639670.1_cds_ACL99188.1_1 [protein=polyprotein] [protein_id=ACL99188.1] [location=73..10254]
FJ639671.1_cds_ACL99189.1_1 [protein=polyprotein] [protein_id=ACL99189.1] [location=73..10251]
FJ639672.1_cds_ACL99190.1_1 [protein=polyprotein] [protein_id=ACL99190.1] [location=65..10243]
FJ639673.1_cds_ACL99191.1_1 [protein=polyprotein] [protein_id=ACL99191.1] [location=73..10251]
FJ639674.1_cds_ACL99192.1_1 [protein=polyprotein] [protein_id=ACL99192.1] [location=56..10234]
FJ639675.1_cds_ACL99193.1_1 [protein=polyprotein] [protein_id=ACL99193.1] [location=73..10251]
FJ639676.1_cds_ACL99194.1_1 [protein=polyprotein] [protein_id=ACL99194.1] [location=73..10251]
FJ639677.1_cds_ACL99195.1_1 [protein=polyprotein] [protein_id=ACL99195.1] [location=73..10251]
FJ639678.1_cds_ACL99196.1_1 [protein=polyprotein] [protein_id=ACL99196.1] [location=73..10251]
FJ639679.1_cds_ACL99197.1_1 [protein=polyprotein] [protein_id=ACL99197.1] [location=73..10251]
FJ639680.1_cds_ACL99198.1_1 [protein=polyprotein] [protein_id=ACL99198.1] [location=73..10251]
FJ639681.1_cds_ACL99199.1_1 [protein=polyprotein] [protein_id=ACL99199.1] [location=61..10239]
FJ639682.1_cds_ACL99200.1_1 [protein=polyprotein] [protein_id=ACL99200.1] [location=73..10251]
FJ639683.1_cds_ACL99201.1_1 [protein=polyprotein] [protein_id=ACL99201.1] [location=57..10235]
FJ639684.1_cds_ACL99202.1_1 [protein=polyprotein] [protein_id=ACL99202.1] [location=59..10237]
FJ639685.1_cds_ACL99203.1_1 [protein=polyprotein] [protein_id=ACL99203.1] [location=73..10251]
FJ639686.1_cds_ACL99204.1_1 [protein=polyprotein] [protein_id=ACL99204.1] [location=73..10251]
FJ639687.1_cds_ACL99205.1_1 [protein=polyprotein] [protein_id=ACL99205.1] [location=73..10251]
FJ639688.1_cds_ACL99206.1_1 [protein=polyprotein] [protein_id=ACL99206.1] [location=73..10251]
FJ639689.1_cds_ACL99207.1_1 [protein=polyprotein] [protein_id=ACL99207.1] [location=73..10251]
FJ639690.1_cds_ACL99208.1_1 [protein=polyprotein] [protein_id=ACL99208.1] [location=73..10251]
FJ639691.1_cds_ACL99209.1_1 [protein=polyprotein] [protein_id=ACL99209.1] [location=73..10251]
FJ639692.1_cds_ACL99210.1_1 [protein=polyprotein] [protein_id=ACL99210.1] [location=73..10251]
FJ639693.1_cds_ACL99211.1_1 [protein=polyprotein] [protein_id=ACL99211.1] [location=73..10251]
FJ639694.1_cds_ACL99212.1_1 [protein=polyprotein] [protein_id=ACL99212.1] [location=73..10251]
FJ639695.1_cds_ACL99213.1_1 [protein=polyprotein] [protein_id=ACL99213.1] [location=73..10251]
FJ639696.1_cds_ACL99214.1_1 [protein=polyprotein] [protein_id=ACL99214.1] [location=73..10251]
FJ639735.1_cds_ACL99022.1_1 [protein=polyprotein] [protein_id=ACL99022.1] [location=73..10251]
FJ639740.1_cds_ACL99027.1_1 [protein=polyprotein] [protein_id=ACL99027.1] [location=73..10251]
FJ639741.1_cds_ACL99028.1_1 [protein=polyprotein] [protein_id=ACL99028.1] [location=73..10251]
FJ639743.1_cds_ACL99030.1_1 [protein=polyprotein] [protein_id=ACL99030.1] [location=57..10235]
FJ639794.1_cds_ACL99081.1_1 [protein=polyprotein] [protein_id=ACL99081.1] [location=73..10251]
FJ639796.1_cds_ACL99083.1_1 [protein=polyprotein] [protein_id=ACL99083.1] [location=73..10251]
FJ639797.1_cds_ACL99084.1_1 [protein=polyprotein] [protein_id=ACL99084.1] [location=73..10251]
FJ639802.1_cds_ACL99089.1_1 [protein=polyprotein] [protein_id=ACL99089.1] [location=73..10251]
FJ639806.1_cds_ACL99093.1_1 [protein=polyprotein] [protein_id=ACL99093.1] [location=73..10251]
FJ639808.1_cds_ACL99095.1_1 [protein=polyprotein] [protein_id=ACL99095.1] [location=73..10251]
FJ639811.1_cds_ACL99098.1_1 [protein=polyprotein] [protein_id=ACL99098.1] [location=73..10251]
FJ639812.1_cds_ACL99099.1_1 [protein=polyprotein] [protein_id=ACL99099.1] [location=73..10251]
FJ639813.1_cds_ACL99100.1_1 [protein=polyprotein] [protein_id=ACL99100.1] [location=73..10251]
FJ639814.1_cds_ACL99101.1_1 [protein=polyprotein] [protein_id=ACL99101.1] [location=73..10251]
FJ639815.1_cds_ACL99102.1_1 [protein=polyprotein] [protein_id=ACL99102.1] [location=73..10251]
FJ639818.1_cds_ACL99105.1_1 [protein=polyprotein] [protein_id=ACL99105.1] [location=73..10251]
FJ639819.1_cds_ACL99106.1_1 [protein=polyprotein] [protein_id=ACL99106.1] [location=73..10251]
FJ639820.1_cds_ACL99107.1_1 [protein=polyprotein] [protein_id=ACL99107.1] [location=73..10251]
FJ639821.1_cds_ACL99108.1_1 [protein=polyprotein] [protein_id=ACL99108.1] [location=73..10251]
FJ639823.1_cds_ACL99110.1_1 [protein=polyprotein] [protein_id=ACL99110.1] [location=73..10251]
FJ639824.1_cds_ACL99111.1_1 [protein=polyprotein] [protein_id=ACL99111.1] [location=73..10251]
FJ432719.1_cds_ACK28181.1_1 [protein=polyprotein] [protein_id=ACK28181.1] [location=73..10251]
FJ432720.1_cds_ACK28182.1_1 [protein=polyprotein] [protein_id=ACK28182.1] [location=73..10251]
FJ432721.1_cds_ACK28183.1_1 [protein=polyprotein] [protein_id=ACK28183.1] [location=73..10251]
FJ461303.1_cds_ACK28184.1_1 [protein=polyprotein] [protein_id=ACK28184.1] [location=73..10254]
FJ478457.1_cds_ACK28188.1_1 [protein=polyprotein] [protein_id=ACK28188.1] [location=59..10237]
FJ478458.1_cds_ACK28189.1_1 [protein=polyprotein] [protein_id=ACK28189.1] [location=63..10241]
FJ384655.1_cds_ACJ12617.1_1 [protein=polyprotein] [protein_id=ACJ12617.1] [location=95..10273]
FJ373296.1_cds_ACJ04172.1_1 [protein=polyprotein] [protein_id=ACJ04172.1] [location=73..10251]
FJ373297.1_cds_ACJ04173.1_1 [protein=polyprotein] [protein_id=ACJ04173.1] [location=73..10251]
FJ373298.1_cds_ACJ04174.1_1 [protein=polyprotein] [protein_id=ACJ04174.1] [location=73..10251]
FJ373305.1_cds_ACJ04181.1_1 [protein=polyprotein] [protein_id=ACJ04181.1] [location=73..10251]
FJ390374.1_cds_ACJ04186.1_1 [protein=polyprotein] [protein_id=ACJ04186.1] [location=73..10251]
FJ390378.1_cds_ACJ04190.1_1 [protein=polyprotein] [protein_id=ACJ04190.1] [location=73..10251]
FJ390379.1_cds_ACJ04191.1_1 [protein=polyprotein] [protein_id=ACJ04191.1] [location=73..10251]
FJ390380.1_cds_ACJ04192.1_1 [protein=polyprotein] [protein_id=ACJ04192.1] [location=73..10251]
FJ390381.1_cds_ACJ04193.1_1 [protein=polyprotein] [protein_id=ACJ04193.1] [location=73..10251]
FJ390382.1_cds_ACJ04194.1_1 [protein=polyprotein] [protein_id=ACJ04194.1] [location=73..10251]
FJ390383.1_cds_ACJ04195.1_1 [protein=polyprotein] [protein_id=ACJ04195.1] [location=73..10251]
FJ390386.1_cds_ACJ04198.1_1 [protein=polyprotein] [protein_id=ACJ04198.1] [location=73..10251]
FJ390388.1_cds_ACJ04200.1_1 [protein=polyprotein] [protein_id=ACJ04200.1] [location=73..10251]
FJ410173.1_cds_ACJ04215.1_1 [protein=polyprotein] [protein_id=ACJ04215.1] [location=73..10251]
FJ410174.1_cds_ACJ04216.1_1 [protein=polyprotein] [protein_id=ACJ04216.1] [location=73..10251]
FJ410175.1_cds_ACJ04217.1_1 [protein=polyprotein] [protein_id=ACJ04217.1] [location=73..10251]
FJ410179.1_cds_ACJ04221.1_1 [protein=polyprotein] [protein_id=ACJ04221.1] [location=73..10251]
FJ410180.1_cds_ACJ04222.1_1 [protein=polyprotein] [protein_id=ACJ04222.1] [location=73..10251]
FJ410181.1_cds_ACJ04223.1_1 [protein=polyprotein] [protein_id=ACJ04223.1] [location=60..10238]
FJ410182.1_cds_ACJ04224.1_1 [protein=polyprotein] [protein_id=ACJ04224.1] [location=73..10251]
FJ410183.1_cds_ACJ04225.1_1 [protein=polyprotein] [protein_id=ACJ04225.1] [location=73..10251]
FJ410184.1_cds_ACJ04226.1_1 [protein=polyprotein] [protein_id=ACJ04226.1] [location=73..10251]
FJ410185.1_cds_ACJ04227.1_1 [protein=polyprotein] [protein_id=ACJ04227.1] [location=73..10251]
FJ410186.1_cds_ACJ04228.1_1 [protein=polyprotein] [protein_id=ACJ04228.1] [location=73..10251]
FJ410187.1_cds_ACJ04229.1_1 [protein=polyprotein] [protein_id=ACJ04229.1] [location=73..10251]
FJ410188.1_cds_ACJ04230.1_1 [protein=polyprotein] [protein_id=ACJ04230.1] [location=73..10251]
FJ410189.1_cds_ACJ04231.1_1 [protein=polyprotein] [protein_id=ACJ04231.1] [location=73..10251]
FJ410190.1_cds_ACJ04232.1_1 [protein=polyprotein] [protein_id=ACJ04232.1] [location=73..10251]
FJ410191.1_cds_ACJ04233.1_1 [protein=polyprotein] [protein_id=ACJ04233.1] [location=72..10250]
FJ410192.1_cds_ACJ04234.1_1 [protein=polyprotein] [protein_id=ACJ04234.1] [location=60..10238]
FJ410194.1_cds_ACJ04236.1_1 [protein=polyprotein] [protein_id=ACJ04236.1] [location=66..10244]
FJ410196.1_cds_ACJ04238.1_1 [protein=polyprotein] [protein_id=ACJ04238.1] [location=74..10252]
FJ410197.1_cds_ACJ04239.1_1 [protein=polyprotein] [protein_id=ACJ04239.1] [location=69..10247]
FJ410198.1_cds_ACJ04240.1_1 [protein=polyprotein] [protein_id=ACJ04240.1] [location=59..10237]
FJ410199.1_cds_ACJ04241.1_1 [protein=polyprotein] [protein_id=ACJ04241.1] [location=59..10237]
FJ410201.1_cds_ACJ04243.1_1 [protein=polyprotein] [protein_id=ACJ04243.1] [location=59..10237]
FJ410203.1_cds_ACJ04245.1_1 [protein=polyprotein] [protein_id=ACJ04245.1] [location=69..10247]
FJ410204.1_cds_ACJ04246.1_1 [protein=polyprotein] [protein_id=ACJ04246.1] [location=73..10251]
FJ410205.1_cds_ACJ04247.1_1 [protein=polyprotein] [protein_id=ACJ04247.1] [location=61..10239]
FJ410206.1_cds_ACJ04248.1_1 [protein=polyprotein] [protein_id=ACJ04248.1] [location=79..10257]
FJ410207.1_cds_ACJ04249.1_1 [protein=polyprotein] [protein_id=ACJ04249.1] [location=66..10244]
FJ410209.1_cds_ACJ04251.1_1 [protein=polyprotein] [protein_id=ACJ04251.1] [location=61..10239]
FJ410210.1_cds_ACJ04252.1_1 [protein=polyprotein] [protein_id=ACJ04252.1] [location=57..10235]
FJ410211.1_cds_ACJ04253.1_1 [protein=polyprotein] [protein_id=ACJ04253.1] [location=57..10235]
FJ410212.1_cds_ACJ04254.1_1 [protein=polyprotein] [protein_id=ACJ04254.1] [location=57..10235]
FJ410213.1_cds_ACJ04255.1_1 [protein=polyprotein] [protein_id=ACJ04255.1] [location=55..10233]
FJ410214.1_cds_ACJ04256.1_1 [protein=polyprotein] [protein_id=ACJ04256.1] [location=57..10235]
FJ410216.1_cds_ACJ04258.1_1 [protein=polyprotein] [protein_id=ACJ04258.1] [location=73..10251]
FJ410218.1_cds_ACJ04260.1_1 [protein=polyprotein] [protein_id=ACJ04260.1] [location=59..10237]
FJ410220.1_cds_ACJ04262.1_1 [protein=polyprotein] [protein_id=ACJ04262.1] [location=55..10233]
FJ410222.1_cds_ACJ04264.1_1 [protein=polyprotein] [protein_id=ACJ04264.1] [location=54..10232]
FJ410225.1_cds_ACJ04267.1_1 [protein=polyprotein] [protein_id=ACJ04267.1] [location=57..10235]
FJ410226.1_cds_ACJ04268.1_1 [protein=polyprotein] [protein_id=ACJ04268.1] [location=73..10251]
FJ410227.1_cds_ACJ04269.1_1 [protein=polyprotein] [protein_id=ACJ04269.1] [location=63..10241]
FJ410230.1_cds_ACJ04272.1_1 [protein=polyprotein] [protein_id=ACJ04272.1] [location=59..10237]
FJ410231.1_cds_ACJ04273.1_1 [protein=polyprotein] [protein_id=ACJ04273.1] [location=54..10232]
FJ410232.1_cds_ACJ04274.1_1 [protein=polyprotein] [protein_id=ACJ04274.1] [location=62..10240]
FJ410234.1_cds_ACJ04276.1_1 [protein=polyprotein] [protein_id=ACJ04276.1] [location=73..10251]
FJ410235.1_cds_ACJ04277.1_1 [protein=polyprotein] [protein_id=ACJ04277.1] [location=62..10240]
FJ410236.1_cds_ACJ04278.1_1 [protein=polyprotein] [protein_id=ACJ04278.1] [location=73..10251]
FJ410238.1_cds_ACJ04280.1_1 [protein=polyprotein] [protein_id=ACJ04280.1] [location=73..10251]
FJ410239.1_cds_ACJ04281.1_1 [protein=polyprotein] [protein_id=ACJ04281.1] [location=73..10251]
FJ410240.1_cds_ACJ04282.1_1 [protein=polyprotein] [protein_id=ACJ04282.1] [location=73..10251]
FJ410242.1_cds_ACJ04284.1_1 [protein=polyprotein] [protein_id=ACJ04284.1] [location=73..10251]
FJ410243.1_cds_ACJ04285.1_1 [protein=polyprotein] [protein_id=ACJ04285.1] [location=73..10251]
FJ410244.1_cds_ACJ04286.1_1 [protein=polyprotein] [protein_id=ACJ04286.1] [location=73..10251]
FJ410245.1_cds_ACJ04287.1_1 [protein=polyprotein] [protein_id=ACJ04287.1] [location=73..10251]
FJ410246.1_cds_ACJ04288.1_1 [protein=polyprotein] [protein_id=ACJ04288.1] [location=73..10251]
FJ410247.1_cds_ACJ04289.1_1 [protein=polyprotein] [protein_id=ACJ04289.1] [location=73..10251]
FJ410248.1_cds_ACJ04290.1_1 [protein=polyprotein] [protein_id=ACJ04290.1] [location=73..10251]
FJ410249.1_cds_ACJ04291.1_1 [protein=polyprotein] [protein_id=ACJ04291.1] [location=73..10251]
FJ410250.1_cds_ACJ04292.1_1 [protein=polyprotein] [protein_id=ACJ04292.1] [location=73..10251]
FJ410251.1_cds_ACJ04293.1_1 [protein=polyprotein] [protein_id=ACJ04293.1] [location=73..10251]
FJ410252.1_cds_ACJ04294.1_1 [protein=polyprotein] [protein_id=ACJ04294.1] [location=73..10251]
FJ410253.1_cds_ACJ04295.1_1 [protein=polyprotein] [protein_id=ACJ04295.1] [location=73..10251]
FJ410254.1_cds_ACJ04296.1_1 [protein=polyprotein] [protein_id=ACJ04296.1] [location=73..10251]
FJ410255.1_cds_ACJ04297.1_1 [protein=polyprotein] [protein_id=ACJ04297.1] [location=73..10251]
FJ410256.1_cds_ACJ04298.1_1 [protein=polyprotein] [protein_id=ACJ04298.1] [location=73..10251]
FJ410257.1_cds_ACJ04299.1_1 [protein=polyprotein] [protein_id=ACJ04299.1] [location=73..10251]
FJ410258.1_cds_ACJ04300.1_1 [protein=polyprotein] [protein_id=ACJ04300.1] [location=73..10251]
FJ410260.1_cds_ACJ04302.1_1 [protein=polyprotein] [protein_id=ACJ04302.1] [location=73..10251]
FJ410261.1_cds_ACJ04303.1_1 [protein=polyprotein] [protein_id=ACJ04303.1] [location=73..10251]
FJ410262.1_cds_ACJ04304.1_1 [protein=polyprotein] [protein_id=ACJ04304.1] [location=73..10251]
FJ410263.1_cds_ACJ04305.1_1 [protein=polyprotein] [protein_id=ACJ04305.1] [location=69..10247]
FJ410264.1_cds_ACJ04306.1_1 [protein=polyprotein] [protein_id=ACJ04306.1] [location=68..10246]
FJ410265.1_cds_ACJ04307.1_1 [protein=polyprotein] [protein_id=ACJ04307.1] [location=73..10251]
FJ410266.1_cds_ACJ04308.1_1 [protein=polyprotein] [protein_id=ACJ04308.1] [location=73..10251]
FJ410267.1_cds_ACJ04309.1_1 [protein=polyprotein] [protein_id=ACJ04309.1] [location=73..10251]
FJ410268.1_cds_ACJ04310.1_1 [protein=polyprotein] [protein_id=ACJ04310.1] [location=73..10251]
FJ410269.1_cds_ACJ04311.1_1 [protein=polyprotein] [protein_id=ACJ04311.1] [location=73..10251]
FJ410270.1_cds_ACJ04312.1_1 [protein=polyprotein] [protein_id=ACJ04312.1] [location=71..10249]
FJ410272.1_cds_ACJ04314.1_1 [protein=polyprotein] [protein_id=ACJ04314.1] [location=73..10251]
FJ410273.1_cds_ACJ04315.1_1 [protein=polyprotein] [protein_id=ACJ04315.1] [location=73..10251]
FJ410274.1_cds_ACJ04316.1_1 [protein=polyprotein] [protein_id=ACJ04316.1] [location=68..10246]
FJ410275.1_cds_ACJ04317.1_1 [protein=polyprotein] [protein_id=ACJ04317.1] [location=73..10251]
FJ410276.1_cds_ACJ04318.1_1 [protein=polyprotein] [protein_id=ACJ04318.1] [location=73..10251]
FJ410277.1_cds_ACJ04319.1_1 [protein=polyprotein] [protein_id=ACJ04319.1] [location=73..10251]
FJ410278.1_cds_ACJ04320.1_1 [protein=polyprotein] [protein_id=ACJ04320.1] [location=73..10251]
FJ410279.1_cds_ACJ04321.1_1 [protein=polyprotein] [protein_id=ACJ04321.1] [location=73..10251]
FJ410280.1_cds_ACJ04322.1_1 [protein=polyprotein] [protein_id=ACJ04322.1] [location=73..10251]
FJ410281.1_cds_ACJ04323.1_1 [protein=polyprotein] [protein_id=ACJ04323.1] [location=73..10251]
FJ410282.1_cds_ACJ04324.1_1 [protein=polyprotein] [protein_id=ACJ04324.1] [location=73..10251]
FJ410283.1_cds_ACJ04325.1_1 [protein=polyprotein] [protein_id=ACJ04325.1] [location=73..10251]
FJ410284.1_cds_ACJ04326.1_1 [protein=polyprotein] [protein_id=ACJ04326.1] [location=73..10251]
FJ410285.1_cds_ACJ04327.1_1 [protein=polyprotein] [protein_id=ACJ04327.1] [location=73..10251]
FJ410286.1_cds_ACJ04328.1_1 [protein=polyprotein] [protein_id=ACJ04328.1] [location=73..10251]
FJ410287.1_cds_ACJ04329.1_1 [protein=polyprotein] [protein_id=ACJ04329.1] [location=73..10251]
FJ410289.1_cds_ACJ04331.1_1 [protein=polyprotein] [protein_id=ACJ04331.1] [location=73..10251]
FJ410290.1_cds_ACJ04332.1_1 [protein=polyprotein] [protein_id=ACJ04332.1] [location=73..10251]
EU863650.1_cds_ACI48993.1_1 [protein=polyprotein] [protein_id=ACI48993.1] [location=95..10273]
FJ182003.1_cds_ACI15856.1_1 [protein=polyprotein] [protein_id=ACI15856.1] [location=73..10251]
FJ182018.1_cds_ACI15857.1_1 [protein=polyprotein] [protein_id=ACI15857.1] [location=73..10251]
FJ182019.1_cds_ACI15858.1_1 [protein=polyprotein] [protein_id=ACI15858.1] [location=73..10251]
FJ182020.1_cds_ACI15859.1_1 [protein=polyprotein] [protein_id=ACI15859.1] [location=73..10251]
FJ182021.1_cds_ACI15860.1_1 [protein=polyprotein] [protein_id=ACI15860.1] [location=73..10251]
FJ182022.1_cds_ACI15861.1_1 [protein=polyprotein] [protein_id=ACI15861.1] [location=73..10251]
FJ182023.1_cds_ACI15862.1_1 [protein=polyprotein] [protein_id=ACI15862.1] [location=73..10251]
FJ182024.1_cds_ACI15863.1_1 [protein=polyprotein] [protein_id=ACI15863.1] [location=73..10251]
FJ182025.1_cds_ACI15864.1_1 [protein=polyprotein] [protein_id=ACI15864.1] [location=73..10251]
FJ182026.1_cds_ACI15865.1_1 [protein=polyprotein] [protein_id=ACI15865.1] [location=73..10251]
FJ182027.1_cds_ACI15866.1_1 [protein=polyprotein] [protein_id=ACI15866.1] [location=73..10251]
FJ182028.1_cds_ACI15867.1_1 [protein=polyprotein] [protein_id=ACI15867.1] [location=73..10251]
FJ182029.1_cds_ACI15868.1_1 [protein=polyprotein] [protein_id=ACI15868.1] [location=73..10251]
FJ182030.1_cds_ACI15869.1_1 [protein=polyprotein] [protein_id=ACI15869.1] [location=73..10251]
FJ182031.1_cds_ACI15870.1_1 [protein=polyprotein] [protein_id=ACI15870.1] [location=73..10251]
FJ182032.1_cds_ACI15871.1_1 [protein=polyprotein] [protein_id=ACI15871.1] [location=73..10251]
FJ182033.1_cds_ACI15872.1_1 [protein=polyprotein] [protein_id=ACI15872.1] [location=73..10251]
FJ182034.1_cds_ACI15873.1_1 [protein=polyprotein] [protein_id=ACI15873.1] [location=59..10237]
FJ182035.1_cds_ACI15874.1_1 [protein=polyprotein] [protein_id=ACI15874.1] [location=73..10251]
FJ182036.1_cds_ACI15875.1_1 [protein=polyprotein] [protein_id=ACI15875.1] [location=73..10251]
FJ205876.1_cds_ACI15876.1_1 [protein=polyprotein] [protein_id=ACI15876.1] [location=73..10251]
FJ205881.1_cds_ACI15881.1_1 [protein=polyprotein] [protein_id=ACI15881.1] [location=73..10251]
FJ205882.1_cds_ACI15882.1_1 [protein=polyprotein] [protein_id=ACI15882.1] [location=73..10251]
FJ205883.1_cds_ACI15883.1_1 [protein=polyprotein] [protein_id=ACI15883.1] [location=73..10251]
FJ205884.1_cds_ACI15884.1_1 [protein=polyprotein] [protein_id=ACI15884.1] [location=73..10251]
FJ182002.1_cds_ACH99650.1_1 [protein=polyprotein] [protein_id=ACH99650.1] [location=73..10251]
FJ205872.1_cds_ACH99678.1_1 [protein=polyprotein] [protein_id=ACH99678.1] [location=73..10251]
FJ205873.1_cds_ACH99679.1_1 [protein=polyprotein] [protein_id=ACH99679.1] [location=73..10251]
FJ205874.1_cds_ACH99680.1_1 [protein=polyprotein] [protein_id=ACH99680.1] [location=73..10251]
FJ205875.1_cds_ACH99681.1_1 [protein=polyprotein] [protein_id=ACH99681.1] [location=73..10251]
FJ024423.1_cds_ACH61713.1_1 [protein=polyprotein] [protein_id=ACH61713.1] [location=73..10251]
FJ024425.1_cds_ACH61735.1_1 [protein=polyprotein] [protein_id=ACH61735.1] [location=73..10251]
FJ024426.1_cds_ACH61736.1_1 [protein=polyprotein] [protein_id=ACH61736.1] [location=73..10251]
FJ024427.1_cds_ACH61737.1_1 [protein=polyprotein] [protein_id=ACH61737.1] [location=73..10251]
FJ024428.1_cds_ACH61738.1_1 [protein=polyprotein] [protein_id=ACH61738.1] [location=73..10251]
FJ024429.1_cds_ACH61739.1_1 [protein=polyprotein] [protein_id=ACH61739.1] [location=73..10251]
FJ024430.1_cds_ACH61740.1_1 [protein=polyprotein] [protein_id=ACH61740.1] [location=73..10251]
FJ024431.1_cds_ACH61741.1_1 [protein=polyprotein] [protein_id=ACH61741.1] [location=73..10251]
FJ024432.1_cds_ACH61742.1_1 [protein=polyprotein] [protein_id=ACH61742.1] [location=73..10251]
FJ024433.1_cds_ACH61743.1_1 [protein=polyprotein] [protein_id=ACH61743.1] [location=73..10251]
FJ024434.1_cds_ACH61744.1_1 [protein=polyprotein] [protein_id=ACH61744.1] [location=73..10251]
FJ024435.1_cds_ACH61745.1_1 [protein=polyprotein] [protein_id=ACH61745.1] [location=73..10251]
FJ024436.1_cds_ACH61746.1_1 [protein=polyprotein] [protein_id=ACH61746.1] [location=73..10251]
FJ024437.1_cds_ACH61747.1_1 [protein=polyprotein] [protein_id=ACH61747.1] [location=73..10251]
FJ024438.1_cds_ACH61748.1_1 [protein=polyprotein] [protein_id=ACH61748.1] [location=73..10251]
FJ024439.1_cds_ACH61749.1_1 [protein=polyprotein] [protein_id=ACH61749.1] [location=73..10251]
FJ024440.1_cds_ACH61750.1_1 [protein=polyprotein] [protein_id=ACH61750.1] [location=73..10251]
FJ024441.1_cds_ACH61751.1_1 [protein=polyprotein] [protein_id=ACH61751.1] [location=73..10251]
FJ024442.1_cds_ACH61752.1_1 [protein=polyprotein] [protein_id=ACH61752.1] [location=73..10251]
FJ024443.1_cds_ACH61753.1_1 [protein=polyprotein] [protein_id=ACH61753.1] [location=73..10251]
FJ024444.1_cds_ACH61754.1_1 [protein=polyprotein] [protein_id=ACH61754.1] [location=73..10251]
FJ024445.1_cds_ACH61755.1_1 [protein=polyprotein] [protein_id=ACH61755.1] [location=73..10251]
FJ024446.1_cds_ACH61756.1_1 [protein=polyprotein] [protein_id=ACH61756.1] [location=73..10251]
FJ024447.1_cds_ACH61757.1_1 [protein=polyprotein] [protein_id=ACH61757.1] [location=73..10251]
FJ024448.1_cds_ACH61758.1_1 [protein=polyprotein] [protein_id=ACH61758.1] [location=73..10251]
FJ024449.1_cds_ACH61759.1_1 [protein=polyprotein] [protein_id=ACH61759.1] [location=73..10251]
FJ024450.1_cds_ACH61760.1_1 [protein=polyprotein] [protein_id=ACH61760.1] [location=73..10251]
FJ024451.1_cds_ACH61761.1_1 [protein=polyprotein] [protein_id=ACH61761.1] [location=73..10251]
FJ024453.1_cds_ACH61763.1_1 [protein=polyprotein] [protein_id=ACH61763.1] [location=73..10251]
FJ024455.1_cds_ACH61765.1_1 [protein=polyprotein] [protein_id=ACH61765.1] [location=73..10251]
FJ024456.1_cds_ACH61766.1_1 [protein=polyprotein] [protein_id=ACH61766.1] [location=73..10251]
FJ024457.1_cds_ACH61767.1_1 [protein=polyprotein] [protein_id=ACH61767.1] [location=73..10251]
FJ024459.1_cds_ACH61769.1_1 [protein=polyprotein] [protein_id=ACH61769.1] [location=73..10251]
FJ024460.1_cds_ACH61770.1_1 [protein=polyprotein] [protein_id=ACH61770.1] [location=73..10251]
FJ024462.1_cds_ACH61772.1_1 [protein=polyprotein] [protein_id=ACH61772.1] [location=73..10251]
FJ024463.1_cds_ACH61773.1_1 [protein=polyprotein] [protein_id=ACH61773.1] [location=73..10251]
FJ024464.1_cds_ACH61774.1_1 [protein=polyprotein] [protein_id=ACH61774.1] [location=73..10251]
FJ024472.1_cds_ACH61775.1_1 [protein=polyprotein] [protein_id=ACH61775.1] [location=73..10251]
FJ024478.1_cds_ACH61727.1_1 [protein=polyprotein] [protein_id=ACH61727.1] [location=73..10251]
FJ024479.1_cds_ACH61728.1_1 [protein=polyprotein] [protein_id=ACH61728.1] [location=73..10251]
FJ024480.1_cds_ACH61729.1_1 [protein=polyprotein] [protein_id=ACH61729.1] [location=73..10251]
FJ024481.1_cds_ACH61730.1_1 [protein=polyprotein] [protein_id=ACH61730.1] [location=73..10251]
FJ024482.1_cds_ACH61731.1_1 [protein=polyprotein] [protein_id=ACH61731.1] [location=73..10251]
FJ024483.1_cds_ACH61732.1_1 [protein=polyprotein] [protein_id=ACH61732.1] [location=73..10251]
FJ024484.1_cds_ACH61733.1_1 [protein=polyprotein] [protein_id=ACH61733.1] [location=73..10251]
FJ024485.1_cds_ACH61734.1_1 [protein=polyprotein] [protein_id=ACH61734.1] [location=73..10251]
EU726777.1_cds_ACE63537.1_1 [protein=polyprotein] [protein_id=ACE63537.1] [location=73..10251]
EU726778.1_cds_ACE63538.1_1 [protein=polyprotein] [protein_id=ACE63538.1] [location=73..10251]
EU726779.1_cds_ACE63539.1_1 [protein=polyprotein] [protein_id=ACE63539.1] [location=73..10251]
EU726780.1_cds_ACE63540.1_1 [protein=polyprotein] [protein_id=ACE63540.1] [location=73..10251]
EU726781.1_cds_ACE63541.1_1 [protein=polyprotein] [protein_id=ACE63541.1] [location=73..10251]
EU726782.1_cds_ACE63542.1_1 [protein=polyprotein] [protein_id=ACE63542.1] [location=73..10251]
EU660390.1_cds_ACD13336.1_1 [protein=polyprotein] [protein_id=ACD13336.1] [location=73..10251]
EU660391.1_cds_ACD13337.1_1 [protein=polyprotein] [protein_id=ACD13337.1] [location=73..10251]
EU660392.1_cds_ACD13338.1_1 [protein=polyprotein] [protein_id=ACD13338.1] [location=73..10251]
EU660393.1_cds_ACD13339.1_1 [protein=polyprotein] [protein_id=ACD13339.1] [location=73..10251]
EU660394.1_cds_ACD13340.1_1 [protein=polyprotein] [protein_id=ACD13340.1] [location=73..10251]
EU660395.1_cds_ACD13341.1_1 [protein=polyprotein] [protein_id=ACD13341.1] [location=73..10251]
EU660396.1_cds_ACD13342.1_1 [protein=polyprotein] [protein_id=ACD13342.1] [location=73..10251]
EU660397.1_cds_ACD13343.1_1 [protein=polyprotein] [protein_id=ACD13343.1] [location=73..10251]
EU660401.1_cds_ACD13312.1_1 [protein=polyprotein] [protein_id=ACD13312.1] [location=73..10251]
EU660402.1_cds_ACD13313.1_1 [protein=polyprotein] [protein_id=ACD13313.1] [location=73..10251]
EU660403.1_cds_ACD13314.1_1 [protein=polyprotein] [protein_id=ACD13314.1] [location=62..10240]
EU660412.1_cds_ACD13323.1_1 [protein=polyprotein] [protein_id=ACD13323.1] [location=73..10251]
EU660418.1_cds_ACD13329.1_1 [protein=polyprotein] [protein_id=ACD13329.1] [location=73..10251]
EU660419.1_cds_ACD13330.1_1 [protein=polyprotein] [protein_id=ACD13330.1] [location=73..10251]
EU677139.1_cds_ACD13346.1_1 [protein=polyprotein] [protein_id=ACD13346.1] [location=73..10251]
EU677140.1_cds_ACD13347.1_1 [protein=polyprotein] [protein_id=ACD13347.1] [location=73..10251]
EU677150.1_cds_ACD13357.1_1 [protein=polyprotein] [protein_id=ACD13357.1] [location=73..10251]
EU677151.1_cds_ACD13358.1_1 [protein=polyprotein] [protein_id=ACD13358.1] [location=73..10251]
EU677152.1_cds_ACD13359.1_1 [protein=polyprotein] [protein_id=ACD13359.1] [location=73..10251]
EU677153.1_cds_ACD13360.1_1 [protein=polyprotein] [protein_id=ACD13360.1] [location=73..10251]
EU677154.1_cds_ACD13361.1_1 [protein=polyprotein] [protein_id=ACD13361.1] [location=73..10251]
EU677155.1_cds_ACD13362.1_1 [protein=polyprotein] [protein_id=ACD13362.1] [location=73..10251]
EU677156.1_cds_ACD13363.1_1 [protein=polyprotein] [protein_id=ACD13363.1] [location=73..10251]
EU677157.1_cds_ACD13364.1_1 [protein=polyprotein] [protein_id=ACD13364.1] [location=73..10251]
EU677158.1_cds_ACD13365.1_1 [protein=polyprotein] [protein_id=ACD13365.1] [location=73..10251]
EU677159.1_cds_ACD13366.1_1 [protein=polyprotein] [protein_id=ACD13366.1] [location=73..10251]
EU677160.1_cds_ACD13367.1_1 [protein=polyprotein] [protein_id=ACD13367.1] [location=73..10251]
EU677161.1_cds_ACD13368.1_1 [protein=polyprotein] [protein_id=ACD13368.1] [location=73..10251]
EU677162.1_cds_ACD13369.1_1 [protein=polyprotein] [protein_id=ACD13369.1] [location=73..10251]
EU677163.1_cds_ACD13370.1_1 [protein=polyprotein] [protein_id=ACD13370.1] [location=73..10251]
EU677164.1_cds_ACD13371.1_1 [protein=polyprotein] [protein_id=ACD13371.1] [location=73..10251]
EU677165.1_cds_ACD13372.1_1 [protein=polyprotein] [protein_id=ACD13372.1] [location=73..10251]
EU677166.1_cds_ACD13373.1_1 [protein=polyprotein] [protein_id=ACD13373.1] [location=73..10251]
EU677167.1_cds_ACD13374.1_1 [protein=polyprotein] [protein_id=ACD13374.1] [location=73..10251]
EU677168.1_cds_ACD13375.1_1 [protein=polyprotein] [protein_id=ACD13375.1] [location=73..10251]
EU677169.1_cds_ACD13376.1_1 [protein=polyprotein] [protein_id=ACD13376.1] [location=73..10251]
EU677170.1_cds_ACD13377.1_1 [protein=polyprotein] [protein_id=ACD13377.1] [location=73..10251]
EU677171.1_cds_ACD13378.1_1 [protein=polyprotein] [protein_id=ACD13378.1] [location=73..10251]
EU677172.1_cds_ACD13379.1_1 [protein=polyprotein] [protein_id=ACD13379.1] [location=73..10251]
EU677173.1_cds_ACD13380.1_1 [protein=polyprotein] [protein_id=ACD13380.1] [location=73..10251]
EU677174.1_cds_ACD13381.1_1 [protein=polyprotein] [protein_id=ACD13381.1] [location=73..10251]
EU677175.1_cds_ACD13382.1_1 [protein=polyprotein] [protein_id=ACD13382.1] [location=73..10251]
EU677176.1_cds_ACD13383.1_1 [protein=polyprotein] [protein_id=ACD13383.1] [location=73..10251]
EU677177.1_cds_ACD13384.1_1 [protein=polyprotein] [protein_id=ACD13384.1] [location=73..10251]
EU677178.1_cds_ACD13385.1_1 [protein=polyprotein] [protein_id=ACD13385.1] [location=73..10251]
EU687247.1_cds_ACD13431.1_1 [protein=polyprotein] [protein_id=ACD13431.1] [location=73..10251]
EU687251.1_cds_ACD13435.1_1 [protein=polyprotein] [protein_id=ACD13435.1] [location=73..10251]
EU596501.1_cds_ACB87142.1_1 [protein=polyprotein] [protein_id=ACB87142.1] [location=73..10251]
EU596502.1_cds_ACB87143.1_1 [protein=polyprotein] [protein_id=ACB87143.1] [location=73..10251]
EU596503.1_cds_ACB87144.1_1 [protein=polyprotein] [protein_id=ACB87144.1] [location=73..10251]
EU596504.1_cds_ACB87145.1_1 [protein=polyprotein] [protein_id=ACB87145.1] [location=73..10251]
EU249490.1_cds_ACA48705.1_1 [protein=polyprotein] [protein_id=ACA48705.1] [location=73..10251]
EU249491.1_cds_ACA48706.1_1 [protein=polyprotein] [protein_id=ACA48706.1] [location=73..10251]
EU249492.1_cds_ACA48707.1_1 [protein=polyprotein] [protein_id=ACA48707.1] [location=73..10251]
EU249493.1_cds_ACA48708.1_1 [protein=polyprotein] [protein_id=ACA48708.1] [location=73..10251]
EU249494.1_cds_ACA48709.1_1 [protein=polyprotein] [protein_id=ACA48709.1] [location=73..10251]
EU249495.1_cds_ACA48710.1_1 [protein=polyprotein] [protein_id=ACA48710.1] [location=73..10251]
EU482476.1_cds_ACA48743.1_1 [protein=polyprotein] [protein_id=ACA48743.1] [location=73..10251]
EU482477.1_cds_ACA48744.1_1 [protein=polyprotein] [protein_id=ACA48744.1] [location=73..10251]
EU482478.1_cds_ACA48745.1_1 [protein=polyprotein] [protein_id=ACA48745.1] [location=73..10251]
EU482479.1_cds_ACA48746.1_1 [protein=polyprotein] [protein_id=ACA48746.1] [location=73..10251]
EU482480.1_cds_ACA48747.1_1 [protein=polyprotein] [protein_id=ACA48747.1] [location=73..10251]
EU482481.1_cds_ACA48748.1_1 [protein=polyprotein] [protein_id=ACA48748.1] [location=73..10251]
EU482482.1_cds_ACA48749.1_1 [protein=polyprotein] [protein_id=ACA48749.1] [location=73..10251]
EU482483.1_cds_ACA48750.1_1 [protein=polyprotein] [protein_id=ACA48750.1] [location=73..10251]
EU482484.1_cds_ACA48751.1_1 [protein=polyprotein] [protein_id=ACA48751.1] [location=73..10251]
EU482485.1_cds_ACA48752.1_1 [protein=polyprotein] [protein_id=ACA48752.1] [location=73..10251]
EU482486.1_cds_ACA48753.1_1 [protein=polyprotein] [protein_id=ACA48753.1] [location=73..10251]
EU482487.1_cds_ACA48754.1_1 [protein=polyprotein] [protein_id=ACA48754.1] [location=73..10251]
EU482488.1_cds_ACA48755.1_1 [protein=polyprotein] [protein_id=ACA48755.1] [location=73..10251]
EU482489.1_cds_ACA48756.1_1 [protein=polyprotein] [protein_id=ACA48756.1] [location=73..10251]
EU482490.1_cds_ACA48757.1_1 [protein=polyprotein] [protein_id=ACA48757.1] [location=73..10251]
EU482491.1_cds_ACA48758.1_1 [protein=polyprotein] [protein_id=ACA48758.1] [location=73..10251]
EU482492.1_cds_ACA48759.1_1 [protein=polyprotein] [protein_id=ACA48759.1] [location=73..10251]
EU482493.1_cds_ACA48760.1_1 [protein=polyprotein] [protein_id=ACA48760.1] [location=73..10251]
EU482494.1_cds_ACA48761.1_1 [protein=polyprotein] [protein_id=ACA48761.1] [location=73..10251]
EU482495.1_cds_ACA48762.1_1 [protein=polyprotein] [protein_id=ACA48762.1] [location=73..10251]
EU482496.1_cds_ACA48763.1_1 [protein=polyprotein] [protein_id=ACA48763.1] [location=73..10251]
EU482497.1_cds_ACA48764.1_1 [protein=polyprotein] [protein_id=ACA48764.1] [location=73..10251]
EU482498.1_cds_ACA48765.1_1 [protein=polyprotein] [protein_id=ACA48765.1] [location=73..10251]
EU482499.1_cds_ACA48766.1_1 [protein=polyprotein] [protein_id=ACA48766.1] [location=73..10251]
EU482500.1_cds_ACA48767.1_1 [protein=polyprotein] [protein_id=ACA48767.1] [location=73..10251]
EU482501.1_cds_ACA48768.1_1 [protein=polyprotein] [protein_id=ACA48768.1] [location=73..10251]
EU482502.1_cds_ACA48769.1_1 [protein=polyprotein] [protein_id=ACA48769.1] [location=73..10251]
EU482503.1_cds_ACA48770.1_1 [protein=polyprotein] [protein_id=ACA48770.1] [location=73..10251]
EU482504.1_cds_ACA48771.1_1 [protein=polyprotein] [protein_id=ACA48771.1] [location=73..10251]
EU482505.1_cds_ACA48772.1_1 [protein=polyprotein] [protein_id=ACA48772.1] [location=73..10251]
EU482506.1_cds_ACA48773.1_1 [protein=polyprotein] [protein_id=ACA48773.1] [location=73..10251]
EU482507.1_cds_ACA48774.1_1 [protein=polyprotein] [protein_id=ACA48774.1] [location=73..10251]
EU482508.1_cds_ACA48775.1_1 [protein=polyprotein] [protein_id=ACA48775.1] [location=73..10251]
EU482509.1_cds_ACA48776.1_1 [protein=polyprotein] [protein_id=ACA48776.1] [location=73..10251]
EU482510.1_cds_ACA48777.1_1 [protein=polyprotein] [protein_id=ACA48777.1] [location=73..10251]
EU482511.1_cds_ACA48778.1_1 [protein=polyprotein] [protein_id=ACA48778.1] [location=73..10251]
EU482512.1_cds_ACA48779.1_1 [protein=polyprotein] [protein_id=ACA48779.1] [location=73..10251]
EU482513.1_cds_ACA48780.1_1 [protein=polyprotein] [protein_id=ACA48780.1] [location=73..10251]
EU482514.1_cds_ACA48781.1_1 [protein=polyprotein] [protein_id=ACA48781.1] [location=73..10251]
EU482515.1_cds_ACA48782.1_1 [protein=polyprotein] [protein_id=ACA48782.1] [location=73..10251]
EU482516.1_cds_ACA48783.1_1 [protein=polyprotein] [protein_id=ACA48783.1] [location=73..10251]
EU482517.1_cds_ACA48784.1_1 [protein=polyprotein] [protein_id=ACA48784.1] [location=73..10251]
EU482518.1_cds_ACA48785.1_1 [protein=polyprotein] [protein_id=ACA48785.1] [location=73..10251]
EU482519.1_cds_ACA48786.1_1 [protein=polyprotein] [protein_id=ACA48786.1] [location=73..10251]
EU482520.1_cds_ACA48787.1_1 [protein=polyprotein] [protein_id=ACA48787.1] [location=73..10251]
EU482521.1_cds_ACA48788.1_1 [protein=polyprotein] [protein_id=ACA48788.1] [location=73..10251]
EU482522.1_cds_ACA48789.1_1 [protein=polyprotein] [protein_id=ACA48789.1] [location=73..10251]
EU482523.1_cds_ACA48790.1_1 [protein=polyprotein] [protein_id=ACA48790.1] [location=73..10251]
EU482524.1_cds_ACA48791.1_1 [protein=polyprotein] [protein_id=ACA48791.1] [location=73..10251]
EU482525.1_cds_ACA48792.1_1 [protein=polyprotein] [protein_id=ACA48792.1] [location=73..10251]
EU482526.1_cds_ACA48793.1_1 [protein=polyprotein] [protein_id=ACA48793.1] [location=73..10251]
EU482527.1_cds_ACA48794.1_1 [protein=polyprotein] [protein_id=ACA48794.1] [location=73..10251]
EU482528.1_cds_ACA48795.1_1 [protein=polyprotein] [protein_id=ACA48795.1] [location=73..10251]
EU482529.1_cds_ACA48796.1_1 [protein=polyprotein] [protein_id=ACA48796.1] [location=73..10251]
EU482530.1_cds_ACA48797.1_1 [protein=polyprotein] [protein_id=ACA48797.1] [location=73..10251]
EU482531.1_cds_ACA48798.1_1 [protein=polyprotein] [protein_id=ACA48798.1] [location=73..10251]
EU482532.1_cds_ACA48799.1_1 [protein=polyprotein] [protein_id=ACA48799.1] [location=73..10251]
EU482533.1_cds_ACA48800.1_1 [protein=polyprotein] [protein_id=ACA48800.1] [location=73..10251]
EU482534.1_cds_ACA48801.1_1 [protein=polyprotein] [protein_id=ACA48801.1] [location=73..10251]
EU482535.1_cds_ACA48802.1_1 [protein=polyprotein] [protein_id=ACA48802.1] [location=73..10251]
EU482536.1_cds_ACA48803.1_1 [protein=polyprotein] [protein_id=ACA48803.1] [location=73..10251]
EU482537.1_cds_ACA48804.1_1 [protein=polyprotein] [protein_id=ACA48804.1] [location=73..10251]
EU482538.1_cds_ACA48805.1_1 [protein=polyprotein] [protein_id=ACA48805.1] [location=73..10251]
EU482539.1_cds_ACA48806.1_1 [protein=polyprotein] [protein_id=ACA48806.1] [location=73..10251]
EU482540.1_cds_ACA48807.1_1 [protein=polyprotein] [protein_id=ACA48807.1] [location=73..10251]
EU482567.1_cds_ACA48834.1_1 [protein=polyprotein] [protein_id=ACA48834.1] [location=73..10251]
EU482591.1_cds_ACA48858.1_1 [protein=polyprotein] [protein_id=ACA48858.1] [location=73..10251]
EU482592.1_cds_ACA48859.1_1 [protein=polyprotein] [protein_id=ACA48859.1] [location=73..10251]
EU482609.1_cds_ACA48876.1_1 [protein=polyprotein] [protein_id=ACA48876.1] [location=73..10251]
EU482610.1_cds_ACA48877.1_1 [protein=polyprotein] [protein_id=ACA48877.1] [location=73..10251]
EU482611.1_cds_ACA48878.1_1 [protein=polyprotein] [protein_id=ACA48878.1] [location=73..10251]
EU482615.1_cds_ACA48882.1_1 [protein=polyprotein] [protein_id=ACA48882.1] [location=73..10251]
EU482616.1_cds_ACA48883.1_1 [protein=polyprotein] [protein_id=ACA48883.1] [location=73..10251]
EU482617.1_cds_ACA48884.1_1 [protein=polyprotein] [protein_id=ACA48884.1] [location=73..10251]
EU482618.1_cds_ACA48885.1_1 [protein=polyprotein] [protein_id=ACA48885.1] [location=73..10251]
EU482619.1_cds_ACA48886.1_1 [protein=polyprotein] [protein_id=ACA48886.1] [location=73..10251]
EU482706.1_cds_ACA48973.1_1 [protein=polyprotein] [protein_id=ACA48973.1] [location=73..10251]
EU482707.1_cds_ACA48974.1_1 [protein=polyprotein] [protein_id=ACA48974.1] [location=73..10251]
EU482708.1_cds_ACA48975.1_1 [protein=polyprotein] [protein_id=ACA48975.1] [location=73..10251]
EU482709.1_cds_ACA48976.1_1 [protein=polyprotein] [protein_id=ACA48976.1] [location=73..10251]
EU482710.1_cds_ACA48977.1_1 [protein=polyprotein] [protein_id=ACA48977.1] [location=73..10251]
EU482711.1_cds_ACA48978.1_1 [protein=polyprotein] [protein_id=ACA48978.1] [location=73..10251]
EU482712.1_cds_ACA48979.1_1 [protein=polyprotein] [protein_id=ACA48979.1] [location=73..10251]
EU482713.1_cds_ACA48980.1_1 [protein=polyprotein] [protein_id=ACA48980.1] [location=73..10251]
EU482714.1_cds_ACA48981.1_1 [protein=polyprotein] [protein_id=ACA48981.1] [location=73..10251]
EU482715.1_cds_ACA48982.1_1 [protein=polyprotein] [protein_id=ACA48982.1] [location=73..10251]
EU482716.1_cds_ACA48983.1_1 [protein=polyprotein] [protein_id=ACA48983.1] [location=73..10251]
EU482717.1_cds_ACA48984.1_1 [protein=polyprotein] [protein_id=ACA48984.1] [location=73..10251]
EU482718.1_cds_ACA48985.1_1 [protein=polyprotein] [protein_id=ACA48985.1] [location=73..10251]
EU482789.1_cds_ACA49056.1_1 [protein=polyprotein] [protein_id=ACA49056.1] [location=73..10251]
EU482790.1_cds_ACA49057.1_1 [protein=polyprotein] [protein_id=ACA49057.1] [location=73..10251]
EU482791.1_cds_ACA49058.1_1 [protein=polyprotein] [protein_id=ACA49058.1] [location=73..10251]
EU482792.1_cds_ACA49059.1_1 [protein=polyprotein] [protein_id=ACA49059.1] [location=73..10251]
EU482793.1_cds_ACA49060.1_1 [protein=polyprotein] [protein_id=ACA49060.1] [location=73..10251]
EU482794.1_cds_ACA49061.1_1 [protein=polyprotein] [protein_id=ACA49061.1] [location=73..10251]
EU482795.1_cds_ACA49062.1_1 [protein=polyprotein] [protein_id=ACA49062.1] [location=73..10251]
EU482796.1_cds_ACA49063.1_1 [protein=polyprotein] [protein_id=ACA49063.1] [location=73..10251]
EU482797.1_cds_ACA49064.1_1 [protein=polyprotein] [protein_id=ACA49064.1] [location=73..10251]
EU482798.1_cds_ACA49065.1_1 [protein=polyprotein] [protein_id=ACA49065.1] [location=73..10251]
EU482799.1_cds_ACA49066.1_1 [protein=polyprotein] [protein_id=ACA49066.1] [location=73..10251]
EU482800.1_cds_ACA49067.1_1 [protein=polyprotein] [protein_id=ACA49067.1] [location=73..10251]
EU482801.1_cds_ACA49068.1_1 [protein=polyprotein] [protein_id=ACA49068.1] [location=73..10251]
EU482802.1_cds_ACA49069.1_1 [protein=polyprotein] [protein_id=ACA49069.1] [location=73..10251]
EU482803.1_cds_ACA49070.1_1 [protein=polyprotein] [protein_id=ACA49070.1] [location=73..10251]
EU482804.1_cds_ACA49071.1_1 [protein=polyprotein] [protein_id=ACA49071.1] [location=73..10251]
EU482805.1_cds_ACA49072.1_1 [protein=polyprotein] [protein_id=ACA49072.1] [location=73..10251]
EU482806.1_cds_ACA49073.1_1 [protein=polyprotein] [protein_id=ACA49073.1] [location=73..10251]
EU482807.1_cds_ACA49074.1_1 [protein=polyprotein] [protein_id=ACA49074.1] [location=73..10251]
EU482808.1_cds_ACA49075.1_1 [protein=polyprotein] [protein_id=ACA49075.1] [location=73..10251]
EU482809.1_cds_ACA49076.1_1 [protein=polyprotein] [protein_id=ACA49076.1] [location=73..10251]
EU482810.1_cds_ACA49077.1_1 [protein=polyprotein] [protein_id=ACA49077.1] [location=73..10251]
EU482811.1_cds_ACA49078.1_1 [protein=polyprotein] [protein_id=ACA49078.1] [location=73..10251]
EU482812.1_cds_ACA49079.1_1 [protein=polyprotein] [protein_id=ACA49079.1] [location=73..10251]
EU482813.1_cds_ACA49080.1_1 [protein=polyprotein] [protein_id=ACA49080.1] [location=73..10251]
EU482814.1_cds_ACA49081.1_1 [protein=polyprotein] [protein_id=ACA49081.1] [location=73..10251]
EU482815.1_cds_ACA49082.1_1 [protein=polyprotein] [protein_id=ACA49082.1] [location=73..10251]
EU482816.1_cds_ACA49083.1_1 [protein=polyprotein] [protein_id=ACA49083.1] [location=73..10251]
EU482817.1_cds_ACA49084.1_1 [protein=polyprotein] [protein_id=ACA49084.1] [location=73..10251]
EU482818.1_cds_ACA49085.1_1 [protein=polyprotein] [protein_id=ACA49085.1] [location=73..10251]
EU482819.1_cds_ACA49086.1_1 [protein=polyprotein] [protein_id=ACA49086.1] [location=73..10251]
EU482820.1_cds_ACA49087.1_1 [protein=polyprotein] [protein_id=ACA49087.1] [location=73..10251]
EU482821.1_cds_ACA49088.1_1 [protein=polyprotein] [protein_id=ACA49088.1] [location=73..10251]
EU482822.1_cds_ACA49089.1_1 [protein=polyprotein] [protein_id=ACA49089.1] [location=73..10251]
EU482823.1_cds_ACA49090.1_1 [protein=polyprotein] [protein_id=ACA49090.1] [location=73..10251]
EU482824.1_cds_ACA49091.1_1 [protein=polyprotein] [protein_id=ACA49091.1] [location=73..10251]
EU482825.1_cds_ACA49092.1_1 [protein=polyprotein] [protein_id=ACA49092.1] [location=73..10251]
EU482826.1_cds_ACA49093.1_1 [protein=polyprotein] [protein_id=ACA49093.1] [location=73..10251]
EU482827.1_cds_ACA49094.1_1 [protein=polyprotein] [protein_id=ACA49094.1] [location=73..10251]
EU482828.1_cds_ACA49095.1_1 [protein=polyprotein] [protein_id=ACA49095.1] [location=73..10251]
EU359008.1_cds_ABY65724.1_1 [protein=polyprotein] [protein_id=ABY65724.1] [location=95..10273]
EU280167.1_cds_ABY26040.1_1 [protein=polyprotein precursor] [protein_id=ABY26040.1] [location=9
AB204803.1_cds_BAE44987.1_1 [protein=polyprotein] [protein_id=BAE44987.1] [location=95..10273]
AY835999.4_cds_AAV97946.4_1 [protein=polyprotein] [protein_id=AAV97946.4] [location=95..10273]
AB195673.1_cds_BAD74042.1_1 [protein=polyprotein] [protein_id=BAD74042.1] [location=95..10273]
AB189120.1_cds_BAD42413.1_1 [protein=polyprotein] [protein_id=BAD42413.1] [location=95..10273]
AB189121.1_cds_BAD42414.1_1 [protein=polyprotein] [protein_id=BAD42414.1] [location=95..10273]
AF311956.1_cds_AAN60368.1_1 [protein=polyprotein] [protein_id=AAN60368.1] [location=95..10273]
AF311957.1_cds_AAN60369.1_1 [protein=polyprotein] [protein_id=AAN60369.1] [location=95..10273]
AF311958.1_cds_AAN60370.1_1 [protein=polyprotein] [protein_id=AAN60370.1] [location=95..10273]

## Sheet: Dengue 2 viruses (n=1538)
Accession number in the NCBI
OK605757.1_cds_UDI89630.1_1 [gene=POLY] [protein=polyprotein] [protein_id=UDI89630.1] [location
OK605758.1_cds_UDI89631.1_1 [gene=POLY] [protein=polyprotein] [protein_id=UDI89631.1] [location
OK605759.1_cds_UDI89632.1_1 [gene=POLY] [protein=polyprotein] [protein_id=UDI89632.1] [location
OK605760.1_cds_UDI89633.1_1 [gene=POLY] [protein=polyprotein] [protein_id=UDI89633.1] [location
OK605761.1_cds_UDI89634.1_1 [gene=POLY] [protein=polyprotein] [protein_id=UDI89634.1] [location
LC666718.1_cds_BDD54326.1_1 [protein=polyprotein] [protein_id=BDD54326.1] [location=97..10272]
LC666719.1_cds_BDD54327.1_1 [protein=polyprotein] [protein_id=BDD54327.1] [location=97..10272]
OL469512.1_cds_UER56708.1_1 [gene=POLY] [protein=polyprotein] [protein_id=UER56708.1] [location
OL469513.1_cds_UER56709.1_1 [gene=POLY] [protein=polyprotein] [protein_id=UER56709.1] [location
OL420733.1_cds_UEM00990.1_1 [gene=POLY] [protein=polyprotein] [protein_id=UEM00990.1] [location
OL412740.1_cds_UEK36475.1_1 [gene=POLY] [protein=polyprotein] [protein_id=UEK36475.1] [location
MT754366.1_cds_QLH12622.1_1 [gene=POLY] [protein=polyprotein] [protein_id=QLH12622.1] [location
MT754367.1_cds_QLH12623.1_1 [gene=POLY] [protein=polyprotein] [protein_id=QLH12623.1] [location
MT754368.1_cds_QLH12624.1_1 [gene=POLY] [protein=polyprotein] [protein_id=QLH12624.1] [location
MT754369.1_cds_QLH12625.1_1 [gene=POLY] [protein=polyprotein] [protein_id=QLH12625.1] [location
MT754370.1_cds_QLH12626.1_1 [gene=POLY] [protein=polyprotein] [protein_id=QLH12626.1] [location
MT754371.1_cds_QLH12627.1_1 [gene=POLY] [protein=polyprotein] [protein_id=QLH12627.1] [location
MT754372.1_cds_QLH12628.1_1 [gene=POLY] [protein=polyprotein] [protein_id=QLH12628.1] [location
MZ945535.1_cds_QZN14219.1_1 [gene=POLY] [protein=polyprotein] [protein_id=QZN14219.1] [location
MW512341.1_cds_QQW40653.1_1 [gene=POLY] [protein=polyprotein] [protein_id=QQW40653.1] [location
MW512362.1_cds_QQW40674.1_1 [gene=POLY] [protein=polyprotein] [protein_id=QQW40674.1] [location
MW512363.1_cds_QQW40675.1_1 [gene=POLY] [protein=polyprotein] [protein_id=QQW40675.1] [location
MW512364.1_cds_QQW40676.1_1 [gene=POLY] [protein=polyprotein] [protein_id=QQW40676.1] [location
MW512365.1_cds_QQW40677.1_1 [gene=POLY] [protein=polyprotein] [protein_id=QQW40677.1] [location
MW512366.1_cds_QQW40678.1_1 [gene=POLY] [protein=polyprotein] [protein_id=QQW40678.1] [location
MW512367.1_cds_QQW40679.1_1 [gene=POLY] [protein=polyprotein] [protein_id=QQW40679.1] [location
MW512368.1_cds_QQW40680.1_1 [gene=POLY] [protein=polyprotein] [protein_id=QQW40680.1] [location
MW512369.1_cds_QQW40681.1_1 [gene=POLY] [protein=polyprotein] [protein_id=QQW40681.1] [location
MW512370.1_cds_QQW40682.1_1 [gene=POLY] [protein=polyprotein] [protein_id=QQW40682.1] [location
MW512371.1_cds_QQW40683.1_1 [gene=POLY] [protein=polyprotein] [protein_id=QQW40683.1] [location
MW512372.1_cds_QQW40684.1_1 [gene=POLY] [protein=polyprotein] [protein_id=QQW40684.1] [location
MW512373.1_cds_QQW40685.1_1 [gene=POLY] [protein=polyprotein] [protein_id=QQW40685.1] [location
MW512374.1_cds_QQW40686.1_1 [gene=POLY] [protein=polyprotein] [protein_id=QQW40686.1] [location
MW512375.1_cds_QQW40687.1_1 [gene=POLY] [protein=polyprotein] [protein_id=QQW40687.1] [location
MW512376.1_cds_QQW40688.1_1 [gene=POLY] [protein=polyprotein] [protein_id=QQW40688.1] [location
MW512377.1_cds_QQW40689.1_1 [gene=POLY] [protein=polyprotein] [protein_id=QQW40689.1] [location
MW512378.1_cds_QQW40690.1_1 [gene=POLY] [protein=polyprotein] [protein_id=QQW40690.1] [location
MW512379.1_cds_QQW40691.1_1 [gene=POLY] [protein=polyprotein] [protein_id=QQW40691.1] [location
MW512380.1_cds_QQW40692.1_1 [gene=POLY] [protein=polyprotein] [protein_id=QQW40692.1] [location
MW512381.1_cds_QQW40693.1_1 [gene=POLY] [protein=polyprotein] [protein_id=QQW40693.1] [location
MW512382.1_cds_QQW40694.1_1 [gene=POLY] [protein=polyprotein] [protein_id=QQW40694.1] [location
MW512383.1_cds_QQW40695.1_1 [gene=POLY] [protein=polyprotein] [protein_id=QQW40695.1] [location
MW512384.1_cds_QQW40696.1_1 [gene=POLY] [protein=polyprotein] [protein_id=QQW40696.1] [location
MW512385.1_cds_QQW40697.1_1 [gene=POLY] [protein=polyprotein] [protein_id=QQW40697.1] [location
MW512386.1_cds_QQW40698.1_1 [gene=POLY] [protein=polyprotein] [protein_id=QQW40698.1] [location
MW512388.1_cds_QQW40700.1_1 [gene=POLY] [protein=polyprotein] [protein_id=QQW40700.1] [location
MW512389.1_cds_QQW40701.1_1 [gene=POLY] [protein=polyprotein] [protein_id=QQW40701.1] [location
MW512390.1_cds_QQW40702.1_1 [gene=POLY] [protein=polyprotein] [protein_id=QQW40702.1] [location
MW512391.1_cds_QQW40703.1_1 [gene=POLY] [protein=polyprotein] [protein_id=QQW40703.1] [location
MW512392.1_cds_QQW40704.1_1 [gene=POLY] [protein=polyprotein] [protein_id=QQW40704.1] [location
MW512393.1_cds_QQW40705.1_1 [gene=POLY] [protein=polyprotein] [protein_id=QQW40705.1] [location
MW512395.1_cds_QQW40707.1_1 [gene=POLY] [protein=polyprotein] [protein_id=QQW40707.1] [location
MW512396.1_cds_QQW40708.1_1 [gene=POLY] [protein=polyprotein] [protein_id=QQW40708.1] [location
MW512398.1_cds_QQW40710.1_1 [gene=POLY] [protein=polyprotein] [protein_id=QQW40710.1] [location
MW512399.1_cds_QQW40711.1_1 [gene=POLY] [protein=polyprotein] [protein_id=QQW40711.1] [location
MW512400.1_cds_QQW40712.1_1 [gene=POLY] [protein=polyprotein] [protein_id=QQW40712.1] [location
MW512401.1_cds_QQW40713.1_1 [gene=POLY] [protein=polyprotein] [protein_id=QQW40713.1] [location
MW512402.1_cds_QQW40714.1_1 [gene=POLY] [protein=polyprotein] [protein_id=QQW40714.1] [location
MW512403.1_cds_QQW40715.1_1 [gene=POLY] [protein=polyprotein] [protein_id=QQW40715.1] [location
MW512404.1_cds_QQW40716.1_1 [gene=POLY] [protein=polyprotein] [protein_id=QQW40716.1] [location
MW512405.1_cds_QQW40717.1_1 [gene=POLY] [protein=polyprotein] [protein_id=QQW40717.1] [location
MW512406.1_cds_QQW40718.1_1 [gene=POLY] [protein=polyprotein] [protein_id=QQW40718.1] [location
MW512407.1_cds_QQW40719.1_1 [gene=POLY] [protein=polyprotein] [protein_id=QQW40719.1] [location
MW512408.1_cds_QQW40720.1_1 [gene=POLY] [protein=polyprotein] [protein_id=QQW40720.1] [location
MW512409.1_cds_QQW40721.1_1 [gene=POLY] [protein=polyprotein] [protein_id=QQW40721.1] [location
MW512410.1_cds_QQW40722.1_1 [gene=POLY] [protein=polyprotein] [protein_id=QQW40722.1] [location
MW512411.1_cds_QQW40723.1_1 [gene=POLY] [protein=polyprotein] [protein_id=QQW40723.1] [location
MW512412.1_cds_QQW40724.1_1 [gene=POLY] [protein=polyprotein] [protein_id=QQW40724.1] [location
MW512413.1_cds_QQW40725.1_1 [gene=POLY] [protein=polyprotein] [protein_id=QQW40725.1] [location
MW512414.1_cds_QQW40726.1_1 [gene=POLY] [protein=polyprotein] [protein_id=QQW40726.1] [location
MW512415.1_cds_QQW40727.1_1 [gene=POLY] [protein=polyprotein] [protein_id=QQW40727.1] [location
MW512417.1_cds_QQW40729.1_1 [gene=POLY] [protein=polyprotein] [protein_id=QQW40729.1] [location
MW512418.1_cds_QQW40730.1_1 [gene=POLY] [protein=polyprotein] [protein_id=QQW40730.1] [location
MW512420.1_cds_QQW40732.1_1 [gene=POLY] [protein=polyprotein] [protein_id=QQW40732.1] [location
MW512421.1_cds_QQW40733.1_1 [gene=POLY] [protein=polyprotein] [protein_id=QQW40733.1] [location
MW512422.1_cds_QQW40734.1_1 [gene=POLY] [protein=polyprotein] [protein_id=QQW40734.1] [location
MW512423.1_cds_QQW40735.1_1 [gene=POLY] [protein=polyprotein] [protein_id=QQW40735.1] [location
MW512425.1_cds_QQW40737.1_1 [gene=POLY] [protein=polyprotein] [protein_id=QQW40737.1] [location
MW512426.1_cds_QQW40738.1_1 [gene=POLY] [protein=polyprotein] [protein_id=QQW40738.1] [location
MW512427.1_cds_QQW40739.1_1 [gene=POLY] [protein=polyprotein] [protein_id=QQW40739.1] [location
MW512428.1_cds_QQW40740.1_1 [gene=POLY] [protein=polyprotein] [protein_id=QQW40740.1] [location
MW512429.1_cds_QQW40741.1_1 [gene=POLY] [protein=polyprotein] [protein_id=QQW40741.1] [location
MW512430.1_cds_QQW40742.1_1 [gene=POLY] [protein=polyprotein] [protein_id=QQW40742.1] [location
MW512431.1_cds_QQW40743.1_1 [gene=POLY] [protein=polyprotein] [protein_id=QQW40743.1] [location
MW512432.1_cds_QQW40744.1_1 [gene=POLY] [protein=polyprotein] [protein_id=QQW40744.1] [location
MW512433.1_cds_QQW40745.1_1 [gene=POLY] [protein=polyprotein] [protein_id=QQW40745.1] [location
MW512434.1_cds_QQW40746.1_1 [gene=POLY] [protein=polyprotein] [protein_id=QQW40746.1] [location
MW512435.1_cds_QQW40747.1_1 [gene=POLY] [protein=polyprotein] [protein_id=QQW40747.1] [location
MW512436.1_cds_QQW40748.1_1 [gene=POLY] [protein=polyprotein] [protein_id=QQW40748.1] [location
MW512437.1_cds_QQW40749.1_1 [gene=POLY] [protein=polyprotein] [protein_id=QQW40749.1] [location
MW512438.1_cds_QQW40750.1_1 [gene=POLY] [protein=polyprotein] [protein_id=QQW40750.1] [location
MW512439.1_cds_QQW40751.1_1 [gene=POLY] [protein=polyprotein] [protein_id=QQW40751.1] [location
MW512440.1_cds_QQW40752.1_1 [gene=POLY] [protein=polyprotein] [protein_id=QQW40752.1] [location
MW512441.1_cds_QQW40753.1_1 [gene=POLY] [protein=polyprotein] [protein_id=QQW40753.1] [location
MW512443.1_cds_QQW40755.1_1 [gene=POLY] [protein=polyprotein] [protein_id=QQW40755.1] [location
MW512444.1_cds_QQW40756.1_1 [gene=POLY] [protein=polyprotein] [protein_id=QQW40756.1] [location
MW512445.1_cds_QQW40757.1_1 [gene=POLY] [protein=polyprotein] [protein_id=QQW40757.1] [location
MW512446.1_cds_QQW40758.1_1 [gene=POLY] [protein=polyprotein] [protein_id=QQW40758.1] [location
MW512447.1_cds_QQW40759.1_1 [gene=POLY] [protein=polyprotein] [protein_id=QQW40759.1] [location
MW512448.1_cds_QQW40760.1_1 [gene=POLY] [protein=polyprotein] [protein_id=QQW40760.1] [location
MW512449.1_cds_QQW40761.1_1 [gene=POLY] [protein=polyprotein] [protein_id=QQW40761.1] [location
MW512450.1_cds_QQW40762.1_1 [gene=POLY] [protein=polyprotein] [protein_id=QQW40762.1] [location
MW512451.1_cds_QQW40763.1_1 [gene=POLY] [protein=polyprotein] [protein_id=QQW40763.1] [location
MW512454.1_cds_QQW40766.1_1 [gene=POLY] [protein=polyprotein] [protein_id=QQW40766.1] [location
MW512456.1_cds_QQW40768.1_1 [gene=POLY] [protein=polyprotein] [protein_id=QQW40768.1] [location
MW512457.1_cds_QQW40769.1_1 [gene=POLY] [protein=polyprotein] [protein_id=QQW40769.1] [location
MW512458.1_cds_QQW40770.1_1 [gene=POLY] [protein=polyprotein] [protein_id=QQW40770.1] [location
MW512461.1_cds_QQW40773.1_1 [gene=POLY] [protein=polyprotein] [protein_id=QQW40773.1] [location
MW512462.1_cds_QQW40774.1_1 [gene=POLY] [protein=polyprotein] [protein_id=QQW40774.1] [location
MW512465.1_cds_QQW40777.1_1 [gene=POLY] [protein=polyprotein] [protein_id=QQW40777.1] [location
MW512467.1_cds_QQW40779.1_1 [gene=POLY] [protein=polyprotein] [protein_id=QQW40779.1] [location
MW512468.1_cds_QQW40780.1_1 [gene=POLY] [protein=polyprotein] [protein_id=QQW40780.1] [location
MW512469.1_cds_QQW40781.1_1 [gene=POLY] [protein=polyprotein] [protein_id=QQW40781.1] [location
MW512470.1_cds_QQW40782.1_1 [gene=POLY] [protein=polyprotein] [protein_id=QQW40782.1] [location
MW512471.1_cds_QQW40783.1_1 [gene=POLY] [protein=polyprotein] [protein_id=QQW40783.1] [location
MW512472.1_cds_QQW40784.1_1 [gene=POLY] [protein=polyprotein] [protein_id=QQW40784.1] [location
MW512473.1_cds_QQW40785.1_1 [gene=POLY] [protein=polyprotein] [protein_id=QQW40785.1] [location
MW512474.1_cds_QQW40786.1_1 [gene=POLY] [protein=polyprotein] [protein_id=QQW40786.1] [location
MW512475.1_cds_QQW40787.1_1 [gene=POLY] [protein=polyprotein] [protein_id=QQW40787.1] [location
MW512476.1_cds_QQW40788.1_1 [gene=POLY] [protein=polyprotein] [protein_id=QQW40788.1] [location
MW512477.1_cds_QQW40789.1_1 [gene=POLY] [protein=polyprotein] [protein_id=QQW40789.1] [location
MW512479.1_cds_QQW40791.1_1 [gene=POLY] [protein=polyprotein] [protein_id=QQW40791.1] [location
MW512480.1_cds_QQW40792.1_1 [gene=POLY] [protein=polyprotein] [protein_id=QQW40792.1] [location
MW512481.1_cds_QQW40793.1_1 [gene=POLY] [protein=polyprotein] [protein_id=QQW40793.1] [location
MW512482.1_cds_QQW40794.1_1 [gene=POLY] [protein=polyprotein] [protein_id=QQW40794.1] [location
MW512483.1_cds_QQW40795.1_1 [gene=POLY] [protein=polyprotein] [protein_id=QQW40795.1] [location
MW512485.1_cds_QQW40797.1_1 [gene=POLY] [protein=polyprotein] [protein_id=QQW40797.1] [location
MW512486.1_cds_QQW40798.1_1 [gene=POLY] [protein=polyprotein] [protein_id=QQW40798.1] [location
MW512487.1_cds_QQW40799.1_1 [gene=POLY] [protein=polyprotein] [protein_id=QQW40799.1] [location
MW512488.1_cds_QQW40800.1_1 [gene=POLY] [protein=polyprotein] [protein_id=QQW40800.1] [location
MW512489.1_cds_QQW40801.1_1 [gene=POLY] [protein=polyprotein] [protein_id=QQW40801.1] [location
MW512490.1_cds_QQW40802.1_1 [gene=POLY] [protein=polyprotein] [protein_id=QQW40802.1] [location
MW512491.1_cds_QQW40803.1_1 [gene=POLY] [protein=polyprotein] [protein_id=QQW40803.1] [location
MW512492.1_cds_QQW40804.1_1 [gene=POLY] [protein=polyprotein] [protein_id=QQW40804.1] [location
MW512493.1_cds_QQW40805.1_1 [gene=POLY] [protein=polyprotein] [protein_id=QQW40805.1] [location
MW512494.1_cds_QQW40806.1_1 [gene=POLY] [protein=polyprotein] [protein_id=QQW40806.1] [location
MW512496.1_cds_QQW40808.1_1 [gene=POLY] [protein=polyprotein] [protein_id=QQW40808.1] [location
MW512497.1_cds_QQW40809.1_1 [gene=POLY] [protein=polyprotein] [protein_id=QQW40809.1] [location
MW512498.1_cds_QQW40810.1_1 [gene=POLY] [protein=polyprotein] [protein_id=QQW40810.1] [location
MW191698.1_cds_QOU99765.1_1 [gene=POLY] [protein=polyprotein] [protein_id=QOU99765.1] [location
MW191699.1_cds_QOU99766.1_1 [gene=POLY] [protein=polyprotein] [protein_id=QOU99766.1] [location
MW191700.1_cds_QOU99767.1_1 [gene=POLY] [protein=polyprotein] [protein_id=QOU99767.1] [location
MW191701.1_cds_QOU99768.1_1 [gene=POLY] [protein=polyprotein] [protein_id=QOU99768.1] [location
MZ008463.1_cds_QUD37241.1_1 [gene=POLY] [protein=polyprotein] [protein_id=QUD37241.1] [location
MZ008467.1_cds_QUD37245.1_1 [gene=POLY] [protein=polyprotein] [protein_id=QUD37245.1] [location
MW186239.1_cds_QOT69946.1_1 [gene=POLY] [protein=polyprotein] [protein_id=QOT69946.1] [location
MW186240.1_cds_QOT69947.1_1 [gene=POLY] [protein=polyprotein] [protein_id=QOT69947.1] [location
MW577813.1_cds_QRG47091.1_1 [gene=POLY] [protein=polyprotein] [protein_id=QRG47091.1] [location
MW577815.1_cds_QRG47093.1_1 [gene=POLY] [protein=polyprotein] [protein_id=QRG47093.1] [location
MW577816.1_cds_QRG47094.1_1 [gene=POLY] [protein=polyprotein] [protein_id=QRG47094.1] [location
MW577817.1_cds_QRG47095.1_1 [gene=POLY] [protein=polyprotein] [protein_id=QRG47095.1] [location
MW577818.1_cds_QRG47096.1_1 [gene=POLY] [protein=polyprotein] [protein_id=QRG47096.1] [location
MW577819.1_cds_QRG47097.1_1 [gene=POLY] [protein=polyprotein] [protein_id=QRG47097.1] [location
MW577821.1_cds_QRG47099.1_1 [gene=POLY] [protein=polyprotein] [protein_id=QRG47099.1] [location
MW577822.1_cds_QRG47100.1_1 [gene=POLY] [protein=polyprotein] [protein_id=QRG47100.1] [location
MW577823.1_cds_QRG47101.1_1 [gene=POLY] [protein=polyprotein] [protein_id=QRG47101.1] [location
MW577824.1_cds_QRG47102.1_1 [gene=POLY] [protein=polyprotein] [protein_id=QRG47102.1] [location
MW577825.1_cds_QRG47103.1_1 [gene=POLY] [protein=polyprotein] [protein_id=QRG47103.1] [location
MW577830.1_cds_QRG47108.1_1 [gene=POLY] [protein=polyprotein] [protein_id=QRG47108.1] [location
MW577831.1_cds_QRG47109.1_1 [gene=POLY] [protein=polyprotein] [protein_id=QRG47109.1] [location
MW577832.1_cds_QRG47110.1_1 [gene=POLY] [protein=polyprotein] [protein_id=QRG47110.1] [location
MW577833.1_cds_QRG47111.1_1 [gene=POLY] [protein=polyprotein] [protein_id=QRG47111.1] [location
MW577834.1_cds_QRG47112.1_1 [gene=POLY] [protein=polyprotein] [protein_id=QRG47112.1] [location
MW577849.1_cds_QRG47127.1_1 [gene=POLY] [protein=polyprotein] [protein_id=QRG47127.1] [location
MK783189.1_cds_QCH40775.1_1 [gene=POLY] [protein=polyprotein] [protein_id=QCH40775.1] [location
MK783190.1_cds_QCH40776.1_1 [gene=POLY] [protein=polyprotein] [protein_id=QCH40776.1] [location
MK783191.1_cds_QCH40777.1_1 [gene=POLY] [protein=polyprotein] [protein_id=QCH40777.1] [location
MK783192.1_cds_QCH40778.1_1 [gene=POLY] [protein=polyprotein] [protein_id=QCH40778.1] [location
MK783193.1_cds_QCH40779.1_1 [gene=POLY] [protein=polyprotein] [protein_id=QCH40779.1] [location
MK783194.1_cds_QCH40780.1_1 [gene=POLY] [protein=polyprotein] [protein_id=QCH40780.1] [location
MK783195.1_cds_QCH40781.1_1 [gene=POLY] [protein=polyprotein] [protein_id=QCH40781.1] [location
MK783196.1_cds_QCH40782.1_1 [gene=POLY] [protein=polyprotein] [protein_id=QCH40782.1] [location
MK783197.1_cds_QCH40783.1_1 [gene=POLY] [protein=polyprotein] [protein_id=QCH40783.1] [location
MK783198.1_cds_QCH40784.1_1 [gene=POLY] [protein=polyprotein] [protein_id=QCH40784.1] [location
MK783199.1_cds_QCH40785.1_1 [gene=POLY] [protein=polyprotein] [protein_id=QCH40785.1] [location
MK783200.1_cds_QCH40786.1_1 [gene=POLY] [protein=polyprotein] [protein_id=QCH40786.1] [location
MK783201.1_cds_QCH40787.1_1 [gene=POLY] [protein=polyprotein] [protein_id=QCH40787.1] [location
MK783202.1_cds_QCH40788.1_1 [gene=POLY] [protein=polyprotein] [protein_id=QCH40788.1] [location
MK783203.1_cds_QCH40789.1_1 [gene=POLY] [protein=polyprotein] [protein_id=QCH40789.1] [location
MK783204.1_cds_QCH40790.1_1 [gene=POLY] [protein=polyprotein] [protein_id=QCH40790.1] [location
MK783205.1_cds_QCH40791.1_1 [gene=POLY] [protein=polyprotein] [protein_id=QCH40791.1] [location
MK783206.1_cds_QCH40792.1_1 [gene=POLY] [protein=polyprotein] [protein_id=QCH40792.1] [location
MK783207.1_cds_QCH40793.1_1 [gene=POLY] [protein=polyprotein] [protein_id=QCH40793.1] [location
MK783208.1_cds_QCH40794.1_1 [gene=POLY] [protein=polyprotein] [protein_id=QCH40794.1] [location
MK783209.1_cds_QCH40795.1_1 [gene=POLY] [protein=polyprotein] [protein_id=QCH40795.1] [location
MK783210.1_cds_QCH40796.1_1 [gene=POLY] [protein=polyprotein] [protein_id=QCH40796.1] [location
MT832053.1_cds_QMT58620.1_1 [gene=POLY] [protein=polyprotein] [protein_id=QMT58620.1] [location
MT832054.1_cds_QMT58621.1_1 [gene=POLY] [protein=polyprotein] [protein_id=QMT58621.1] [location
MT832055.1_cds_QMT58622.1_1 [gene=POLY] [protein=polyprotein] [protein_id=QMT58622.1] [location
MT832056.1_cds_QMT58623.1_1 [gene=POLY] [protein=polyprotein] [protein_id=QMT58623.1] [location
MT832057.1_cds_QMT58624.1_1 [gene=POLY] [protein=polyprotein] [protein_id=QMT58624.1] [location
MT832058.1_cds_QMT58625.1_1 [gene=POLY] [protein=polyprotein] [protein_id=QMT58625.1] [location
MT832059.1_cds_QMT58626.1_1 [gene=POLY] [protein=polyprotein] [protein_id=QMT58626.1] [location
MT832060.1_cds_QMT58627.1_1 [gene=POLY] [protein=polyprotein] [protein_id=QMT58627.1] [location
MT832061.1_cds_QMT58628.1_1 [gene=POLY] [protein=polyprotein] [protein_id=QMT58628.1] [location
MT832063.1_cds_QMT58630.1_1 [gene=POLY] [protein=polyprotein] [protein_id=QMT58630.1] [location
MT832065.1_cds_QMT58632.1_1 [gene=POLY] [protein=polyprotein] [protein_id=QMT58632.1] [location
MT832067.1_cds_QMT58634.1_1 [gene=POLY] [protein=polyprotein] [protein_id=QMT58634.1] [location
MT832069.1_cds_QMT58636.1_1 [gene=POLY] [protein=polyprotein] [protein_id=QMT58636.1] [location
MT832071.1_cds_QMT58638.1_1 [gene=POLY] [protein=polyprotein] [protein_id=QMT58638.1] [location
MT832072.1_cds_QMT58639.1_1 [gene=POLY] [protein=polyprotein] [protein_id=QMT58639.1] [location
MT832073.1_cds_QMT58640.1_1 [gene=POLY] [protein=polyprotein] [protein_id=QMT58640.1] [location
MT832074.1_cds_QMT58641.1_1 [gene=POLY] [protein=polyprotein] [protein_id=QMT58641.1] [location
MT832075.1_cds_QMT58642.1_1 [gene=POLY] [protein=polyprotein] [protein_id=QMT58642.1] [location
MT832076.1_cds_QMT58643.1_1 [gene=POLY] [protein=polyprotein] [protein_id=QMT58643.1] [location
MT832077.1_cds_QMT58644.1_1 [gene=POLY] [protein=polyprotein] [protein_id=QMT58644.1] [location
MT832078.1_cds_QMT58645.1_1 [gene=POLY] [protein=polyprotein] [protein_id=QMT58645.1] [location
MT832079.1_cds_QMT58646.1_1 [gene=POLY] [protein=polyprotein] [protein_id=QMT58646.1] [location
MT832080.1_cds_QMT58647.1_1 [gene=POLY] [protein=polyprotein] [protein_id=QMT58647.1] [location
MN566111.1_cds_QGQ59353.1_1 [gene=POLY] [protein=polyprotein] [protein_id=QGQ59353.1] [location
MN566112.1_cds_QGQ59354.1_1 [gene=POLY] [protein=polyprotein] [protein_id=QGQ59354.1] [location
MT921571.1_cds_QNJ99449.1_1 [gene=POLY] [protein=polyprotein] [protein_id=QNJ99449.1] [location
MT899084.1_cds_QNH29582.1_1 [gene=POLY] [protein=polyprotein] [protein_id=QNH29582.1] [location
MT899085.1_cds_QNH29583.1_1 [gene=POLY] [protein=polyprotein] [protein_id=QNH29583.1] [location
MT897896.1_cds_QNG98968.1_1 [gene=POLY] [protein=polyprotein] [protein_id=QNG98968.1] [location
MT076937.1_cds_QIB99390.1_1 [gene=POLY] [protein=polyprotein] [protein_id=QIB99390.1] [location
MT180479.1_cds_QIJ58805.1_1 [gene=POLY] [protein=polyprotein] [protein_id=QIJ58805.1] [location
LC436669.1_cds_BBH51317.1_1 [protein=polyprotein] [protein_id=BBH51317.1] [location=69..10244]
LC436670.1_cds_BBH51318.1_1 [protein=polyprotein] [protein_id=BBH51318.1] [location=69..10244]
LC436671.1_cds_BBH51319.1_1 [protein=polyprotein] [protein_id=BBH51319.1] [location=69..10244]
LC436672.1_cds_BBH51320.1_1 [protein=polyprotein] [protein_id=BBH51320.1] [location=69..10244]
LC436673.1_cds_BBH51321.1_1 [protein=polyprotein] [protein_id=BBH51321.1] [location=69..10244]
LC436674.1_cds_BBH51322.1_1 [protein=polyprotein] [protein_id=BBH51322.1] [location=69..10244]
LC436675.1_cds_BBH51323.1_1 [protein=polyprotein] [protein_id=BBH51323.1] [location=69..10244]
MN018337.1_cds_QDG00699.1_1 [gene=POLY] [protein=polyprotein] [protein_id=QDG00699.1] [location
MN018338.1_cds_QDG00700.1_1 [gene=POLY] [protein=polyprotein] [protein_id=QDG00700.1] [location
MN018339.1_cds_QDG00701.1_1 [gene=POLY] [protein=polyprotein] [protein_id=QDG00701.1] [location
MN018340.1_cds_QDG00702.1_1 [gene=POLY] [protein=polyprotein] [protein_id=QDG00702.1] [location
MN018341.1_cds_QDG00703.1_1 [gene=POLY] [protein=polyprotein] [protein_id=QDG00703.1] [location
MN018342.1_cds_QDG00704.1_1 [gene=POLY] [protein=polyprotein] [protein_id=QDG00704.1] [location
MN018343.1_cds_QDG00705.1_1 [gene=POLY] [protein=polyprotein] [protein_id=QDG00705.1] [location
MN018344.1_cds_QDG00706.1_1 [gene=POLY] [protein=polyprotein] [protein_id=QDG00706.1] [location
MN018345.1_cds_QDG00707.1_1 [gene=POLY] [protein=polyprotein] [protein_id=QDG00707.1] [location
MN018346.1_cds_QDG00708.1_1 [gene=POLY] [protein=polyprotein] [protein_id=QDG00708.1] [location
MN018347.1_cds_QDG00709.1_1 [gene=POLY] [protein=polyprotein] [protein_id=QDG00709.1] [location
MN018348.1_cds_QDG00710.1_1 [gene=POLY] [protein=polyprotein] [protein_id=QDG00710.1] [location
MN018349.1_cds_QDG00711.1_1 [gene=POLY] [protein=polyprotein] [protein_id=QDG00711.1] [location
MN018350.1_cds_QDG00712.1_1 [gene=POLY] [protein=polyprotein] [protein_id=QDG00712.1] [location
MN018351.1_cds_QDG00713.1_1 [gene=POLY] [protein=polyprotein] [protein_id=QDG00713.1] [location
MN018352.1_cds_QDG00714.1_1 [gene=POLY] [protein=polyprotein] [protein_id=QDG00714.1] [location
MN018353.1_cds_QDG00715.1_1 [gene=POLY] [protein=polyprotein] [protein_id=QDG00715.1] [location
MN018354.1_cds_QDG00716.1_1 [gene=POLY] [protein=polyprotein] [protein_id=QDG00716.1] [location
MN018355.1_cds_QDG00717.1_1 [gene=POLY] [protein=polyprotein] [protein_id=QDG00717.1] [location
MN018356.1_cds_QDG00718.1_1 [gene=POLY] [protein=polyprotein] [protein_id=QDG00718.1] [location
MN018357.1_cds_QDG00719.1_1 [gene=POLY] [protein=polyprotein] [protein_id=QDG00719.1] [location
MN018358.1_cds_QDG00720.1_1 [gene=POLY] [protein=polyprotein] [protein_id=QDG00720.1] [location
MN018359.1_cds_QDG00721.1_1 [gene=POLY] [protein=polyprotein] [protein_id=QDG00721.1] [location
MN018360.1_cds_QDG00722.1_1 [gene=POLY] [protein=polyprotein] [protein_id=QDG00722.1] [location
MN018361.1_cds_QDG00723.1_1 [gene=POLY] [protein=polyprotein] [protein_id=QDG00723.1] [location
MN018362.1_cds_QDG00724.1_1 [gene=POLY] [protein=polyprotein] [protein_id=QDG00724.1] [location
MN018363.1_cds_QDG00725.1_1 [gene=POLY] [protein=polyprotein] [protein_id=QDG00725.1] [location
MN018364.1_cds_QDG00726.1_1 [gene=POLY] [protein=polyprotein] [protein_id=QDG00726.1] [location
MN018365.1_cds_QDG00727.1_1 [gene=POLY] [protein=polyprotein] [protein_id=QDG00727.1] [location
MN018366.1_cds_QDG00728.1_1 [gene=POLY] [protein=polyprotein] [protein_id=QDG00728.1] [location
JN819404.1_cds_QGJ02362.1_1 [protein=polyprotein] [protein_id=QGJ02362.1] [location=67..10242]
MH891768.1_cds_QBA57535.1_1 [gene=POLY] [protein=polyprotein] [protein_id=QBA57535.1] [location
MH891770.1_cds_QBA57537.1_1 [gene=POLY] [protein=polyprotein] [protein_id=QBA57537.1] [location
MH891772.1_cds_QBA57539.1_1 [gene=POLY] [protein=polyprotein] [protein_id=QBA57539.1] [location
MN272404.1_cds_QEI46448.1_1 [gene=POLY] [protein=polyprotein] [protein_id=QEI46448.1] [location
MN272405.1_cds_QEI46449.1_1 [gene=POLY] [protein=polyprotein] [protein_id=QEI46449.1] [location
MN239505.1_cds_QDZ58871.1_1 [gene=POLY] [protein=polyprotein] [protein_id=QDZ58871.1] [location
MK411558.1_cds_QBE90251.1_1 [gene=POLY] [protein=polyprotein] [protein_id=QBE90251.1] [location
MK411559.1_cds_QBE90252.1_1 [gene=POLY] [protein=polyprotein] [protein_id=QBE90252.1] [location
MH827525.1_cds_AYP74869.1_1 [protein=polyprotein] [protein_id=AYP74869.1] [location=97..10272]
MH827526.1_cds_AYP74870.1_1 [protein=polyprotein] [protein_id=AYP74870.1] [location=97..10272]
MH827527.1_cds_AYP74871.1_1 [protein=polyprotein] [protein_id=AYP74871.1] [location=97..10272]
MH827528.1_cds_AYP74872.1_1 [protein=polyprotein] [protein_id=AYP74872.1] [location=97..10272]
MH827529.1_cds_AYP74873.1_1 [protein=polyprotein] [protein_id=AYP74873.1] [location=97..10272]
MH827530.1_cds_AYP74874.1_1 [protein=polyprotein] [protein_id=AYP74874.1] [location=97..10272]
MH827531.1_cds_AYP74875.1_1 [protein=polyprotein] [protein_id=AYP74875.1] [location=97..10272]
MH827532.1_cds_AYP74876.1_1 [protein=polyprotein] [protein_id=AYP74876.1] [location=97..10272]
MH827533.1_cds_AYP74877.1_1 [protein=polyprotein] [protein_id=AYP74877.1] [location=97..10272]
MH827534.1_cds_AYP74878.1_1 [protein=polyprotein] [protein_id=AYP74878.1] [location=97..10272]
MH827535.1_cds_AYP74879.1_1 [protein=polyprotein] [protein_id=AYP74879.1] [location=97..10272]
MH827536.1_cds_AYP74880.1_1 [protein=polyprotein] [protein_id=AYP74880.1] [location=97..10272]
MH827537.1_cds_AYP74881.1_1 [protein=polyprotein] [protein_id=AYP74881.1] [location=97..10272]
MH827538.1_cds_AYP74882.1_1 [protein=polyprotein] [protein_id=AYP74882.1] [location=97..10272]
MH827539.1_cds_AYP74883.1_1 [protein=polyprotein] [protein_id=AYP74883.1] [location=97..10272]
MH827540.1_cds_AYP74884.1_1 [protein=polyprotein] [protein_id=AYP74884.1] [location=97..10272]
MH827541.1_cds_AYP74885.1_1 [protein=polyprotein] [protein_id=AYP74885.1] [location=97..10272]
MH827542.1_cds_AYP74886.1_1 [protein=polyprotein] [protein_id=AYP74886.1] [location=97..10272]
MH827543.1_cds_AYP74887.1_1 [protein=polyprotein] [protein_id=AYP74887.1] [location=97..10272]
MH827544.1_cds_AYP74888.1_1 [protein=polyprotein] [protein_id=AYP74888.1] [location=97..10272]
MH827545.1_cds_AYP74889.1_1 [protein=polyprotein] [protein_id=AYP74889.1] [location=97..10272]
MH827546.1_cds_AYP74890.1_1 [protein=polyprotein] [protein_id=AYP74890.1] [location=97..10272]
MH827547.1_cds_AYP74891.1_1 [protein=polyprotein] [protein_id=AYP74891.1] [location=97..10272]
MH827548.1_cds_AYP74892.1_1 [protein=polyprotein] [protein_id=AYP74892.1] [location=97..10272]
MH827549.1_cds_AYP74893.1_1 [protein=polyprotein] [protein_id=AYP74893.1] [location=97..10272]
MH827550.1_cds_AYP74894.1_1 [protein=polyprotein] [protein_id=AYP74894.1] [location=97..10272]
MH827551.1_cds_AYP74895.1_1 [protein=polyprotein] [protein_id=AYP74895.1] [location=97..10272]
MH827552.1_cds_AYP74896.1_1 [protein=polyprotein] [protein_id=AYP74896.1] [location=97..10272]
MH827553.1_cds_AYP74897.1_1 [protein=polyprotein] [protein_id=AYP74897.1] [location=97..10272]
MH827554.1_cds_AYP74898.1_1 [protein=polyprotein] [protein_id=AYP74898.1] [location=97..10272]
MK543448.1_cds_QBP33510.1_1 [gene=POLY] [protein=polyprotein] [protein_id=QBP33510.1] [location
MK543449.1_cds_QBP33511.1_1 [gene=POLY] [protein=polyprotein] [protein_id=QBP33511.1] [location
MK543450.1_cds_QBP33512.1_1 [gene=POLY] [protein=polyprotein] [protein_id=QBP33512.1] [location
MK543471.1_cds_QBP33513.1_1 [gene=POLY] [protein=polyprotein] [protein_id=QBP33513.1] [location
MK543479.1_cds_QBP33514.1_1 [gene=POLY] [protein=polyprotein] [protein_id=QBP33514.1] [location
MK513444.1_cds_QBK46796.1_1 [gene=POLY] [protein=polyprotein] [protein_id=QBK46796.1] [location
KY672945.1_cds_ARO78356.1_1 [protein=polyprotein] [protein_id=ARO78356.1] [location=97..10272]
KY672946.1_cds_ARO78357.1_1 [protein=polyprotein] [protein_id=ARO78357.1] [location=97..10272]
KY672947.1_cds_ARO78358.1_1 [protein=polyprotein] [protein_id=ARO78358.1] [location=97..10272]
KY672948.1_cds_ARO78359.1_1 [protein=polyprotein] [protein_id=ARO78359.1] [location=97..10272]
KY672949.1_cds_ARO78360.1_1 [protein=polyprotein] [protein_id=ARO78360.1] [location=97..10272]
KY672950.1_cds_ARO78361.1_1 [protein=polyprotein] [protein_id=ARO78361.1] [location=97..10272]
KY672951.1_cds_ARO78362.1_1 [protein=polyprotein] [protein_id=ARO78362.1] [location=112..10287]
KY672952.1_cds_ARO78363.1_1 [protein=polyprotein] [protein_id=ARO78363.1] [location=100..10275]
KY672953.1_cds_ARO78364.1_1 [protein=polyprotein] [protein_id=ARO78364.1] [location=97..10272]
KY672954.1_cds_ARO78365.1_1 [protein=polyprotein] [protein_id=ARO78365.1] [location=97..10272]
KY672955.1_cds_ARO78366.1_1 [protein=polyprotein] [protein_id=ARO78366.1] [location=97..10272]
MH823208.1_cds_QBB90022.1_1 [gene=POLY] [protein=polyprotein] [protein_id=QBB90022.1] [location
MK268692.1_cds_QBA57667.1_1 [gene=POLY] [protein=polyprotein] [protein_id=QBA57667.1] [location
MH888331.1_cds_QBA29681.1_1 [gene=POLY] [protein=polyprotein] [protein_id=QBA29681.1] [location
MH010629.1_cds_AZS59400.1_1 [protein=polyprotein] [protein_id=AZS59400.1] [location=97..10272]
MG721054.1_cds_AYJ72757.1_1 [protein=flavivirus polyprotein] [protein_id=AYJ72757.1] [location=
MG721055.1_cds_AYJ72758.1_1 [protein=flavivirus polyprotein] [protein_id=AYJ72758.1] [location=
MG721056.1_cds_AYJ72759.1_1 [protein=flavivirus polyprotein] [protein_id=AYJ72759.1] [location=
MG721057.1_cds_AYJ72760.1_1 [protein=flavivirus polyprotein] [protein_id=AYJ72760.1] [location=
MG721058.1_cds_AYJ72761.1_1 [protein=flavivirus polyprotein] [protein_id=AYJ72761.1] [location=
MG721062.1_cds_AYJ72762.1_1 [protein=flavivirus polyprotein] [protein_id=AYJ72762.1] [location=
MH822939.1_cds_AYJ72763.1_1 [protein=polyprotein] [protein_id=AYJ72763.1] [location=84..10259]
MH822940.1_cds_AYJ72764.1_1 [protein=polyprotein] [protein_id=AYJ72764.1] [location=97..10272]
MH822941.1_cds_AYJ72765.1_1 [protein=polyprotein] [protein_id=AYJ72765.1] [location=97..10272]
MH822942.1_cds_AYJ72766.1_1 [protein=polyprotein] [protein_id=AYJ72766.1] [location=97..10272]
MH822943.1_cds_AYJ72767.1_1 [protein=polyprotein] [protein_id=AYJ72767.1] [location=22..10197]
MH822944.1_cds_AYJ72768.1_1 [protein=polyprotein] [protein_id=AYJ72768.1] [location=97..10272]
MH822945.1_cds_AYJ72769.1_1 [protein=polyprotein] [protein_id=AYJ72769.1] [location=97..10272]
MH822946.1_cds_AYJ72770.1_1 [protein=polyprotein] [protein_id=AYJ72770.1] [location=97..10272]
MH822947.1_cds_AYJ72771.1_1 [protein=polyprotein] [protein_id=AYJ72771.1] [location=97..10272]
MH822948.1_cds_AYJ72772.1_1 [protein=polyprotein] [protein_id=AYJ72772.1] [location=97..10272]
MH822949.1_cds_AYJ72773.1_1 [protein=polyprotein] [protein_id=AYJ72773.1] [location=97..10272]
MH822950.1_cds_AYJ72774.1_1 [protein=polyprotein] [protein_id=AYJ72774.1] [location=75..10250]
MH822951.1_cds_AYJ72775.1_1 [protein=polyprotein] [protein_id=AYJ72775.1] [location=75..10250]
MH822952.1_cds_AYJ72776.1_1 [protein=polyprotein] [protein_id=AYJ72776.1] [location=75..10250]
MH822953.1_cds_AYJ72777.1_1 [protein=polyprotein] [protein_id=AYJ72777.1] [location=75..10250]
MH822954.1_cds_AYJ72778.1_1 [protein=polyprotein] [protein_id=AYJ72778.1] [location=75..10250]
MH822955.1_cds_AYJ72779.1_1 [protein=polyprotein] [protein_id=AYJ72779.1] [location=75..10250]
MH822956.1_cds_AYJ72780.1_1 [protein=polyprotein] [protein_id=AYJ72780.1] [location=75..10250]
MH985858.1_cds_AYO90660.1_1 [protein=polyprotein] [protein_id=AYO90660.1] [location=97..10272]
MH985859.1_cds_AYO90661.1_1 [protein=polyprotein] [protein_id=AYO90661.1] [location=96..10271]
MG560143.1_cds_AYE66919.1_1 [protein=polyprotein] [protein_id=AYE66919.1] [location=97..10272]
MG560144.1_cds_AYE66920.1_1 [protein=polyprotein] [protein_id=AYE66920.1] [location=97..10272]
MH110564.1_cds_AXU25276.1_1 [protein=polyprotein] [protein_id=AXU25276.1] [location=1..10176] [
MH110565.1_cds_AXU25277.1_1 [protein=polyprotein] [protein_id=AXU25277.1] [location=1..10176] [
MH110566.1_cds_AXU25278.1_1 [protein=polyprotein] [protein_id=AXU25278.1] [location=1..10176] [
MH110567.1_cds_AXU25279.1_1 [protein=polyprotein] [protein_id=AXU25279.1] [location=1..10176] [
MH110568.1_cds_AXU25280.1_1 [protein=polyprotein] [protein_id=AXU25280.1] [location=1..10176] [
MH110569.1_cds_AXU25281.1_1 [protein=polyprotein] [protein_id=AXU25281.1] [location=1..10176] [
MH110570.1_cds_AXU25282.1_1 [protein=polyprotein] [protein_id=AXU25282.1] [location=1..10176] [
MH110571.1_cds_AXU25283.1_1 [protein=polyprotein] [protein_id=AXU25283.1] [location=1..10176] [
MH110572.1_cds_AXU25284.1_1 [protein=polyprotein] [protein_id=AXU25284.1] [location=1..10176] [
MH110573.1_cds_AXU25285.1_1 [protein=polyprotein] [protein_id=AXU25285.1] [location=1..10176] [
MH110574.1_cds_AXU25286.1_1 [protein=polyprotein] [protein_id=AXU25286.1] [location=1..10176] [
MH110575.1_cds_AXU25287.1_1 [protein=polyprotein] [protein_id=AXU25287.1] [location=1..10176] [
MH110576.1_cds_AXU25288.1_1 [protein=polyprotein] [protein_id=AXU25288.1] [location=1..10176] [
MH110577.1_cds_AXU25289.1_1 [protein=polyprotein] [protein_id=AXU25289.1] [location=1..10176] [
MH110578.1_cds_AXU25290.1_1 [protein=polyprotein] [protein_id=AXU25290.1] [location=1..10176] [
MH110579.1_cds_AXU25291.1_1 [protein=polyprotein] [protein_id=AXU25291.1] [location=1..10176] [
MH110580.1_cds_AXU25292.1_1 [protein=polyprotein] [protein_id=AXU25292.1] [location=1..10176] [
MH110581.1_cds_AXU25293.1_1 [protein=polyprotein] [protein_id=AXU25293.1] [location=1..10176] [
MH110582.1_cds_AXU25294.1_1 [protein=polyprotein] [protein_id=AXU25294.1] [location=1..10176] [
MH110583.1_cds_AXU25295.1_1 [protein=polyprotein] [protein_id=AXU25295.1] [location=1..10176] [
MH110584.1_cds_AXU25296.1_1 [protein=polyprotein] [protein_id=AXU25296.1] [location=1..10176] [
MH110585.1_cds_AXU25297.1_1 [protein=polyprotein] [protein_id=AXU25297.1] [location=1..10176] [
MH110586.1_cds_AXU25298.1_1 [protein=polyprotein] [protein_id=AXU25298.1] [location=1..10176] [
MH110587.1_cds_AXU25299.1_1 [protein=polyprotein] [protein_id=AXU25299.1] [location=1..10176] [
MH110588.1_cds_AXU25300.1_1 [protein=polyprotein] [protein_id=AXU25300.1] [location=1..10176] [
MH110589.1_cds_AXU25301.1_1 [protein=polyprotein] [protein_id=AXU25301.1] [location=1..10176] [
MH110590.1_cds_AXU25302.1_1 [protein=polyprotein] [protein_id=AXU25302.1] [location=1..10176] [
MH110591.1_cds_AXU25303.1_1 [protein=polyprotein] [protein_id=AXU25303.1] [location=1..10176] [
MH110592.1_cds_AXU25304.1_1 [protein=polyprotein] [protein_id=AXU25304.1] [location=1..10176] [
MH110593.1_cds_AXU25305.1_1 [protein=polyprotein] [protein_id=AXU25305.1] [location=1..10176] [
MH110594.1_cds_AXU25306.1_1 [protein=polyprotein] [protein_id=AXU25306.1] [location=1..10176] [
MH110595.1_cds_AXU25307.1_1 [protein=polyprotein] [protein_id=AXU25307.1] [location=1..10176] [
MH110596.1_cds_AXU25308.1_1 [protein=polyprotein] [protein_id=AXU25308.1] [location=1..10176] [
MH110597.1_cds_AXU25309.1_1 [protein=polyprotein] [protein_id=AXU25309.1] [location=1..10176] [
MH110598.1_cds_AXU25310.1_1 [protein=polyprotein] [protein_id=AXU25310.1] [location=1..10176] [
MH110599.1_cds_AXU25311.1_1 [protein=polyprotein] [protein_id=AXU25311.1] [location=1..10176] [
MH110600.1_cds_AXU25312.1_1 [protein=polyprotein] [protein_id=AXU25312.1] [location=1..10176] [
MH110601.1_cds_AXU25313.1_1 [protein=polyprotein] [protein_id=AXU25313.1] [location=1..10176] [
MH110602.1_cds_AXU25314.1_1 [protein=polyprotein] [protein_id=AXU25314.1] [location=1..10176] [
MH110603.1_cds_AXU25315.1_1 [protein=polyprotein] [protein_id=AXU25315.1] [location=1..10176] [
MH069495.1_cds_AWK29889.1_1 [protein=polyprotein] [protein_id=AWK29889.1] [location=88..10263]
MH069496.1_cds_AWK29890.1_1 [protein=polyprotein] [protein_id=AWK29890.1] [location=88..10263]
MH069497.1_cds_AWK29891.1_1 [protein=polyprotein] [protein_id=AWK29891.1] [location=87..10262]
MH069498.1_cds_AWK29892.1_1 [protein=polyprotein] [protein_id=AWK29892.1] [location=78..10253]
MH069499.1_cds_AWK29893.1_1 [protein=polyprotein] [protein_id=AWK29893.1] [location=85..10260]
MF314189.1_cds_AWI64266.1_1 [protein=polyprotein] [protein_id=AWI64266.1] [location=88..10263]
MH215277.1_cds_AWI47685.1_1 [protein=polyprotein] [protein_id=AWI47685.1] [location=97..10272]
KY794785.1_cds_AVD96673.1_1 [protein=polyprotein] [protein_id=AVD96673.1] [location=76..10251]
KY670633.1_cds_AUY62011.1_1 [protein=polyprotein] [protein_id=AUY62011.1] [location=61..10236]
KY474308.1_cds_AUN35117.1_1 [protein=polyprotein] [protein_id=AUN35117.1] [location=75..10250]
KY474309.1_cds_AUN35118.1_1 [protein=polyprotein] [protein_id=AUN35118.1] [location=75..10250]
KY474310.1_cds_AUN35119.1_1 [protein=polyprotein] [protein_id=AUN35119.1] [location=75..10250]
KY474311.1_cds_AUN35120.1_1 [protein=polyprotein] [protein_id=AUN35120.1] [location=75..10250]
KY474312.1_cds_AUN35121.1_1 [protein=polyprotein] [protein_id=AUN35121.1] [location=75..10250]
KY474314.1_cds_AUN35123.1_1 [protein=polyprotein] [protein_id=AUN35123.1] [location=75..10250]
KY474315.1_cds_AUN35124.1_1 [protein=polyprotein] [protein_id=AUN35124.1] [location=75..10250]
KY474316.1_cds_AUN35125.1_1 [protein=polyprotein] [protein_id=AUN35125.1] [location=75..10250]
KY474317.1_cds_AUN35126.1_1 [protein=polyprotein] [protein_id=AUN35126.1] [location=75..10250]
KY474318.1_cds_AUN35127.1_1 [protein=polyprotein] [protein_id=AUN35127.1] [location=75..10250]
KY474319.1_cds_AUN35128.1_1 [protein=polyprotein] [protein_id=AUN35128.1] [location=75..10250]
KY474320.1_cds_AUN35129.1_1 [protein=polyprotein] [protein_id=AUN35129.1] [location=75..10250]
KY474321.1_cds_AUN35130.1_1 [protein=polyprotein] [protein_id=AUN35130.1] [location=75..10250]
KY474322.1_cds_AUN35131.1_1 [protein=polyprotein] [protein_id=AUN35131.1] [location=75..10250]
KY474323.1_cds_AUN35132.1_1 [protein=polyprotein] [protein_id=AUN35132.1] [location=75..10250]
KY474324.1_cds_AUN35133.1_1 [protein=polyprotein] [protein_id=AUN35133.1] [location=75..10250]
KY474325.1_cds_AUN35134.1_1 [protein=polyprotein] [protein_id=AUN35134.1] [location=75..10250]
KY474326.1_cds_AUN35135.1_1 [protein=polyprotein] [protein_id=AUN35135.1] [location=75..10250]
KY474327.1_cds_AUN35136.1_1 [protein=polyprotein] [protein_id=AUN35136.1] [location=75..10250]
KY474328.1_cds_AUN35137.1_1 [protein=polyprotein] [protein_id=AUN35137.1] [location=75..10250]
KY474329.1_cds_AUN35138.1_1 [protein=polyprotein] [protein_id=AUN35138.1] [location=75..10250]
KY474330.1_cds_AUN35139.1_1 [protein=polyprotein] [protein_id=AUN35139.1] [location=75..10250]
KY474331.1_cds_AUN35140.1_1 [protein=polyprotein] [protein_id=AUN35140.1] [location=75..10250]
KY474332.1_cds_AUN35141.1_1 [protein=polyprotein] [protein_id=AUN35141.1] [location=75..10250]
KY474333.1_cds_AUN35142.1_1 [protein=polyprotein] [protein_id=AUN35142.1] [location=75..10250]
KY474334.1_cds_AUN35143.1_1 [protein=polyprotein] [protein_id=AUN35143.1] [location=75..10250]
KY882458.1_cds_AUB45105.1_1 [protein=polyprotein] [protein_id=AUB45105.1] [location=97..10272]
MG189962.1_cds_ATO98049.1_1 [protein=polyprotein] [protein_id=ATO98049.1] [location=51..10226]
KY937185.1_cds_AST11588.1_1 [protein=polyprotein] [protein_id=AST11588.1] [location=101..10276]
KY937186.1_cds_AST11589.1_1 [protein=polyprotein] [protein_id=AST11589.1] [location=100..10275]
KY937187.1_cds_AST11590.1_1 [protein=polyprotein] [protein_id=AST11590.1] [location=100..10275]
KY937188.1_cds_AST11591.1_1 [protein=polyprotein] [protein_id=AST11591.1] [location=100..10275]
KY937189.1_cds_AST11592.1_1 [protein=polyprotein] [protein_id=AST11592.1] [location=93..10268]
KY937190.1_cds_AST11593.1_1 [protein=polyprotein] [protein_id=AST11593.1] [location=100..10275]
MF459663.3_cds_ASN77915.1_1 [protein=polyprotein] [protein_id=ASN77915.1] [location=97..10272]
KY923048.1_cds_ART85716.1_1 [protein=polyprotein] [protein_id=ART85716.1] [location=97..10269]
KX452015.1_cds_ARO84675.1_1 [protein=polyprotein] [protein_id=ARO84675.1] [location=186..10361]
KX452016.1_cds_ARO84676.1_1 [protein=polyprotein] [protein_id=ARO84676.1] [location=84..10259]
KX452017.1_cds_ARO84677.1_1 [protein=polyprotein] [protein_id=ARO84677.1] [location=174..10349]
KX452018.1_cds_ARO84678.1_1 [protein=polyprotein] [protein_id=ARO84678.1] [location=129..10304]
KX452019.1_cds_ARO84679.1_1 [protein=polyprotein] [protein_id=ARO84679.1] [location=194..10369]
KX452020.1_cds_ARO84680.1_1 [protein=polyprotein] [protein_id=ARO84680.1] [location=189..10364]
KX452021.1_cds_ARO84681.1_1 [protein=polyprotein] [protein_id=ARO84681.1] [location=148..10323]
KX452022.1_cds_ARO84682.1_1 [protein=polyprotein] [protein_id=ARO84682.1] [location=194..10369]
KX452024.1_cds_ARO84683.1_1 [protein=polyprotein] [protein_id=ARO84683.1] [location=241..10416]
KX452025.1_cds_ARO84684.1_1 [protein=polyprotein] [protein_id=ARO84684.1] [location=163..10338]
KX452026.1_cds_ARO84685.1_1 [protein=polyprotein] [protein_id=ARO84685.1] [location=195..10370]
KX452027.1_cds_ARO84686.1_1 [protein=polyprotein] [protein_id=ARO84686.1] [location=135..10310]
KX452028.1_cds_ARO84687.1_1 [protein=polyprotein] [protein_id=ARO84687.1] [location=195..10370]
KX452029.1_cds_ARO84688.1_1 [protein=polyprotein] [protein_id=ARO84688.1] [location=121..10296]
KX452030.1_cds_ARO84689.1_1 [protein=polyprotein] [protein_id=ARO84689.1] [location=117..10292]
KX452031.1_cds_ARO84690.1_1 [protein=polyprotein] [protein_id=ARO84690.1] [location=197..10372]
KX452032.1_cds_ARO84691.1_1 [protein=polyprotein] [protein_id=ARO84691.1] [location=126..10301]
KX452033.1_cds_ARO84692.1_1 [protein=polyprotein] [protein_id=ARO84692.1] [location=172..10347]
KX452034.1_cds_ARO84693.1_1 [protein=polyprotein] [protein_id=ARO84693.1] [location=188..10312]
KX452035.1_cds_ARO84694.1_1 [protein=polyprotein] [protein_id=ARO84694.1] [location=166..10341]
KX452036.1_cds_ARO84695.1_1 [protein=polyprotein] [protein_id=ARO84695.1] [location=33..10208]
KX452037.1_cds_ARO84696.1_1 [protein=polyprotein] [protein_id=ARO84696.1] [location=150..10325]
KX452038.1_cds_ARO84697.1_1 [protein=polyprotein] [protein_id=ARO84697.1] [location=85..10260]
KX452039.1_cds_ARO84698.1_1 [protein=polyprotein] [protein_id=ARO84698.1] [location=63..10238]
KX452040.1_cds_ARO84699.1_1 [protein=polyprotein] [protein_id=ARO84699.1] [location=190..10365]
KX452041.1_cds_ARO84700.1_1 [protein=polyprotein] [protein_id=ARO84700.1] [location=195..10370]
KX452042.1_cds_ARO84701.1_1 [protein=polyprotein] [protein_id=ARO84701.1] [location=189..10364]
KX452043.1_cds_ARO84702.1_1 [protein=polyprotein] [protein_id=ARO84702.1] [location=184..10359]
KX452044.1_cds_ARO84703.1_1 [protein=polyprotein] [protein_id=ARO84703.1] [location=141..10316]
KX452045.1_cds_ARO84704.1_1 [protein=polyprotein] [protein_id=ARO84704.1] [location=206..10381]
KX452046.1_cds_ARO84705.1_1 [protein=polyprotein] [protein_id=ARO84705.1] [location=143..10318]
KY427084.1_cds_ARO52692.1_1 [protein=polyprotein] [protein_id=ARO52692.1] [location=97..10272]
KY427085.1_cds_ARO52693.1_1 [protein=polyprotein] [protein_id=ARO52693.1] [location=97..10272]
KY921904.1_cds_ARM59245.1_1 [protein=polyprotein] [protein_id=ARM59245.1] [location=97..10272]
KY921905.1_cds_ARM59246.1_1 [protein=polyprotein] [protein_id=ARM59246.1] [location=97..10272]
KY627762.1_cds_AQV12083.1_1 [protein=polyprotein] [protein_id=AQV12083.1] [location=73..10248]
KY627763.1_cds_AQV12084.1_1 [protein=polyprotein] [protein_id=AQV12084.1] [location=73..10248]
KX621245.1_cds_AQS22536.1_1 [protein=polyprotein] [protein_id=AQS22536.1] [location=55..10230]
KX621246.1_cds_AQS22537.1_1 [protein=polyprotein] [protein_id=AQS22537.1] [location=55..10230]
KX621247.1_cds_AQS22538.1_1 [protein=polyprotein] [protein_id=AQS22538.1] [location=55..10230]
KX621248.1_cds_AQS22539.1_1 [protein=polyprotein] [protein_id=AQS22539.1] [location=55..10230]
KX655786.1_cds_AQS22554.1_1 [protein=polyprotein] [protein_id=AQS22554.1] [location=75..10250]
KX655787.1_cds_AQS22555.1_1 [protein=polyprotein] [protein_id=AQS22555.1] [location=51..10226]
KX655788.1_cds_AQS22556.1_1 [protein=polyprotein] [protein_id=AQS22556.1] [location=75..10250]
KY415992.1_cds_APW84878.1_1 [protein=polyprotein] [protein_id=APW84878.1] [location=97..10272]
KU509267.1_cds_ANC57593.1_1 [protein=polyprotein] [protein_id=ANC57593.1] [location=32..10207]
KU509268.1_cds_ANC57594.1_1 [protein=polyprotein] [protein_id=ANC57594.1] [location=9..10184] [
KU509269.1_cds_ANC57595.1_1 [protein=polyprotein] [protein_id=ANC57595.1] [location=26..10201]
KU509270.1_cds_ANC57596.1_1 [protein=polyprotein] [protein_id=ANC57596.1] [location=5..10180] [
KU509271.1_cds_ANC57597.1_1 [protein=polyprotein] [protein_id=ANC57597.1] [location=16..10191]
KU509272.1_cds_ANC57598.1_1 [protein=polyprotein] [protein_id=ANC57598.1] [location=38..10213]
KU509273.1_cds_ANC57599.1_1 [protein=polyprotein] [protein_id=ANC57599.1] [location=15..10190]
KU509274.1_cds_ANC57600.1_1 [protein=polyprotein] [protein_id=ANC57600.1] [location=9..10184] [
KU509275.1_cds_ANC57601.1_1 [protein=polyprotein] [protein_id=ANC57601.1] [location=23..10198]
KU509276.1_cds_ANC57602.1_1 [protein=polyprotein] [protein_id=ANC57602.1] [location=8..10183] [
KU509277.1_cds_ANC57603.1_1 [protein=polyprotein] [protein_id=ANC57603.1] [location=21..10196]
KX225485.1_cds_APW49449.1_1 [protein=polyprotein] [protein_id=APW49449.1] [location=75..10250]
KX225486.1_cds_APW49450.1_1 [protein=polyprotein] [protein_id=APW49450.1] [location=51..10226]
KX702403.1_cds_AOE23002.1_1 [protein=polyprotein] [protein_id=AOE23002.1] [location=97..10272]
KX702404.1_cds_AOE23003.1_1 [protein=polyprotein] [protein_id=AOE23003.1] [location=97..10272]
KX274130.1_cds_ANY58849.1_1 [protein=polyprotein] [protein_id=ANY58849.1] [location=97..10269]
KX372564.1_cds_ANY58850.1_1 [protein=polyprotein] [protein_id=ANY58850.1] [location=97..10272]
KU517845.1_cds_ANT47238.1_1 [protein=polyprotein] [protein_id=ANT47238.1] [location=97..10272]
KU517846.1_cds_ANT47239.1_1 [protein=polyprotein] [protein_id=ANT47239.1] [location=97..10272]
KU517847.1_cds_ANT47240.1_1 [protein=polyprotein] [protein_id=ANT47240.1] [location=97..10272]
KU948303.1_cds_ANS72888.1_1 [protein=polyprotein] [protein_id=ANS72888.1] [location=88..10263]
KP188549.1_cds_AKQ00020.1_1 [protein=polyprotein] [protein_id=AKQ00020.1] [location=205..10380]
KP188550.1_cds_AKQ00021.1_1 [protein=polyprotein] [protein_id=AKQ00021.1] [location=136..10311]
KP188551.1_cds_AKQ00022.1_1 [protein=polyprotein] [protein_id=AKQ00022.1] [location=121..10296]
KP188552.1_cds_AKQ00023.1_1 [protein=polyprotein] [protein_id=AKQ00023.1] [location=35..10210]
KP188553.1_cds_AKQ00024.1_1 [protein=polyprotein] [protein_id=AKQ00024.1] [location=81..10256]
KP188554.1_cds_AKQ00025.1_1 [protein=polyprotein] [protein_id=AKQ00025.1] [location=207..10382]
KP188555.1_cds_AKQ00026.1_1 [protein=polyprotein] [protein_id=AKQ00026.1] [location=165..10340]
KP188556.1_cds_AKQ00027.1_1 [protein=polyprotein] [protein_id=AKQ00027.1] [location=34..10209]
KP188569.1_cds_AKQ00040.1_1 [protein=polyprotein] [protein_id=AKQ00040.1] [location=163..10338]
KX380807.1_cds_ANS59166.1_1 [protein=polyprotein] [protein_id=ANS59166.1] [location=97..10272]
KX380808.1_cds_ANS59167.1_1 [protein=polyprotein] [protein_id=ANS59167.1] [location=97..10272]
KX380809.1_cds_ANS59168.1_1 [protein=polyprotein] [protein_id=ANS59168.1] [location=97..10272]
KX380810.1_cds_ANS59169.1_1 [protein=polyprotein] [protein_id=ANS59169.1] [location=97..10272]
KX380811.1_cds_ANS59170.1_1 [protein=polyprotein] [protein_id=ANS59170.1] [location=97..10272]
KX380812.1_cds_ANS59171.1_1 [protein=polyprotein] [protein_id=ANS59171.1] [location=97..10272]
KX380813.1_cds_ANS59172.1_1 [protein=polyprotein] [protein_id=ANS59172.1] [location=97..10272]
KX380814.1_cds_ANS59173.1_1 [protein=polyprotein] [protein_id=ANS59173.1] [location=97..10272]
KX380815.1_cds_ANS59174.1_1 [protein=polyprotein] [protein_id=ANS59174.1] [location=97..10272]
KX380816.1_cds_ANS59175.1_1 [protein=polyprotein] [protein_id=ANS59175.1] [location=97..10272]
KX380817.1_cds_ANS59176.1_1 [protein=polyprotein] [protein_id=ANS59176.1] [location=97..10272]
KX380818.1_cds_ANS59177.1_1 [protein=polyprotein] [protein_id=ANS59177.1] [location=97..10272]
KX380819.1_cds_ANS59178.1_1 [protein=polyprotein] [protein_id=ANS59178.1] [location=97..10272]
KX380820.1_cds_ANS59179.1_1 [protein=polyprotein] [protein_id=ANS59179.1] [location=97..10272]
KX380821.1_cds_ANS59180.1_1 [protein=polyprotein] [protein_id=ANS59180.1] [location=97..10272]
KX380822.1_cds_ANS59181.1_1 [protein=polyprotein] [protein_id=ANS59181.1] [location=97..10272]
KX380823.1_cds_ANS59182.1_1 [protein=polyprotein] [protein_id=ANS59182.1] [location=97..10272]
KX380824.1_cds_ANS59183.1_1 [protein=polyprotein] [protein_id=ANS59183.1] [location=97..10272]
KX380825.1_cds_ANS59184.1_1 [protein=polyprotein] [protein_id=ANS59184.1] [location=97..10272]
KX380826.1_cds_ANS59185.1_1 [protein=polyprotein] [protein_id=ANS59185.1] [location=97..10272]
KX380827.1_cds_ANS59186.1_1 [protein=polyprotein] [protein_id=ANS59186.1] [location=97..10272]
KX380828.1_cds_ANS59187.1_1 [protein=polyprotein] [protein_id=ANS59187.1] [location=97..10272]
KX380829.1_cds_ANS59188.1_1 [protein=polyprotein] [protein_id=ANS59188.1] [location=97..10272]
KX380830.1_cds_ANS59189.1_1 [protein=polyprotein] [protein_id=ANS59189.1] [location=97..10272]
KX380831.1_cds_ANS59190.1_1 [protein=polyprotein] [protein_id=ANS59190.1] [location=97..10272]
KX380832.1_cds_ANS59191.1_1 [protein=polyprotein] [protein_id=ANS59191.1] [location=97..10272]
KX380833.1_cds_ANS59192.1_1 [protein=polyprotein] [protein_id=ANS59192.1] [location=97..10272]
KX380834.1_cds_ANS59193.1_1 [protein=polyprotein] [protein_id=ANS59193.1] [location=97..10272]
KX380835.1_cds_ANS59194.1_1 [protein=polyprotein] [protein_id=ANS59194.1] [location=97..10272]
KX380836.1_cds_ANS59195.1_1 [protein=polyprotein] [protein_id=ANS59195.1] [location=97..10272]
KX380837.1_cds_ANS59196.1_1 [protein=polyprotein] [protein_id=ANS59196.1] [location=97..10272]
KX380838.1_cds_ANS59197.1_1 [protein=polyprotein] [protein_id=ANS59197.1] [location=97..10272]
LC111438.1_cds_BAU36333.1_1 [protein=polyprotein] [protein_id=BAU36333.1] [location=77..10252]
KT187553.1_cds_ALP06110.1_1 [protein=polyprotein] [protein_id=ALP06110.1] [location=97..10272]
KT187554.1_cds_ALP06111.1_1 [protein=polyprotein] [protein_id=ALP06111.1] [location=97..10272]
KT187555.1_cds_ALP06112.1_1 [protein=polyprotein] [protein_id=ALP06112.1] [location=97..10272]
KT187556.1_cds_ALP06113.1_1 [protein=polyprotein] [protein_id=ALP06113.1] [location=97..10272]
KT187557.1_cds_ALP06114.1_1 [protein=polyprotein] [protein_id=ALP06114.1] [location=97..10272]
KT187558.1_cds_ALP06115.1_1 [protein=polyprotein] [protein_id=ALP06115.1] [location=97..10272]
KM217156.1_cds_AIU39216.1_1 [protein=polyprotein] [protein_id=AIU39216.1] [location=65..10240]
KM217157.1_cds_AIU39217.1_1 [protein=polyprotein] [protein_id=AIU39217.1] [location=65..10240]
KM217158.1_cds_AIU39218.1_1 [protein=polyprotein] [protein_id=AIU39218.1] [location=65..10240]
KP723478.1_cds_AKQ62914.1_1 [protein=polyprotein] [protein_id=AKQ62914.1] [location=10..10185]
KP723479.1_cds_AKQ62915.1_1 [protein=polyprotein] [protein_id=AKQ62915.1] [location=97..10272]
KJ701507.1_cds_AIE17400.1_1 [protein=polyprotein] [protein_id=AIE17400.1] [location=65..10240]
KR779782.1_cds_AKL81369.1_1 [protein=polyprotein] [protein_id=AKL81369.1] [location=97..10272]
KR779786.2_cds_AKL81373.2_1 [protein=polyprotein] [protein_id=AKL81373.2] [location=97..10272]
KM279515.1_cds_AKA54983.1_1 [protein=polyprotein] [protein_id=AKA54983.1] [location=97..10272]
KM279517.1_cds_AKA54985.1_1 [protein=polyprotein] [protein_id=AKA54985.1] [location=97..10272]
KM279518.1_cds_AKA54986.1_1 [protein=polyprotein] [protein_id=AKA54986.1] [location=97..10272]
KM279519.1_cds_AKA54987.1_1 [protein=polyprotein] [protein_id=AKA54987.1] [location=97..10272]
KM279520.1_cds_AKA54988.1_1 [protein=polyprotein] [protein_id=AKA54988.1] [location=97..10272]
KM279521.1_cds_AKA54989.1_1 [protein=polyprotein] [protein_id=AKA54989.1] [location=97..10272]
KM279522.1_cds_AKA54990.1_1 [protein=polyprotein] [protein_id=AKA54990.1] [location=97..10272]
KM279523.1_cds_AKA54991.1_1 [protein=polyprotein] [protein_id=AKA54991.1] [location=97..10272]
KM279524.1_cds_AKA54992.1_1 [protein=polyprotein] [protein_id=AKA54992.1] [location=97..10272]
KM279525.1_cds_AKA54993.1_1 [protein=polyprotein] [protein_id=AKA54993.1] [location=97..10272]
KM279526.1_cds_AKA54994.1_1 [protein=polyprotein] [protein_id=AKA54994.1] [location=97..10272]
KM279528.1_cds_AKA54996.1_1 [protein=polyprotein] [protein_id=AKA54996.1] [location=97..10272]
KM279530.1_cds_AKA54998.1_1 [protein=polyprotein] [protein_id=AKA54998.1] [location=97..10272]
KM279532.1_cds_AKA55000.1_1 [protein=polyprotein] [protein_id=AKA55000.1] [location=97..10272]
KM279533.1_cds_AKA55001.1_1 [protein=polyprotein] [protein_id=AKA55001.1] [location=97..10272]
KM279534.1_cds_AKA55002.1_1 [protein=polyprotein] [protein_id=AKA55002.1] [location=97..10272]
KM279535.1_cds_AKA55003.1_1 [protein=polyprotein] [protein_id=AKA55003.1] [location=97..10272]
KM279536.1_cds_AKA55004.1_1 [protein=polyprotein] [protein_id=AKA55004.1] [location=97..10272]
KM279537.1_cds_AKA55005.1_1 [protein=polyprotein] [protein_id=AKA55005.1] [location=97..10272]
KM279538.1_cds_AKA55006.1_1 [protein=polyprotein] [protein_id=AKA55006.1] [location=97..10272]
KM279539.1_cds_AKA55007.1_1 [protein=polyprotein] [protein_id=AKA55007.1] [location=97..10272]
KM279540.1_cds_AKA55008.1_1 [protein=polyprotein] [protein_id=AKA55008.1] [location=97..10272]
KM279541.1_cds_AKA55009.1_1 [protein=polyprotein] [protein_id=AKA55009.1] [location=97..10272]
KM279542.1_cds_AKA55010.1_1 [protein=polyprotein] [protein_id=AKA55010.1] [location=97..10272]
KM279543.1_cds_AKA55011.1_1 [protein=polyprotein] [protein_id=AKA55011.1] [location=97..10272]
KM279544.1_cds_AKA55012.1_1 [protein=polyprotein] [protein_id=AKA55012.1] [location=97..10272]
KM279545.1_cds_AKA55013.1_1 [protein=polyprotein] [protein_id=AKA55013.1] [location=97..10272]
KM279546.1_cds_AKA55014.1_1 [protein=polyprotein] [protein_id=AKA55014.1] [location=97..10272]
KM279548.1_cds_AKA55016.1_1 [protein=polyprotein] [protein_id=AKA55016.1] [location=97..10272]
KM279549.1_cds_AKA55017.1_1 [protein=polyprotein] [protein_id=AKA55017.1] [location=97..10272]
KM279550.1_cds_AKA55018.1_1 [protein=polyprotein] [protein_id=AKA55018.1] [location=97..10272]
KM279551.1_cds_AKA55019.1_1 [protein=polyprotein] [protein_id=AKA55019.1] [location=97..10272]
KM279552.1_cds_AKA55020.1_1 [protein=polyprotein] [protein_id=AKA55020.1] [location=97..10272]
KM279553.1_cds_AKA55021.1_1 [protein=polyprotein] [protein_id=AKA55021.1] [location=97..10272]
KM279554.1_cds_AKA55022.1_1 [protein=polyprotein] [protein_id=AKA55022.1] [location=97..10272]
KM279555.1_cds_AKA55023.1_1 [protein=polyprotein] [protein_id=AKA55023.1] [location=97..10272]
KM279556.1_cds_AKA55024.1_1 [protein=polyprotein] [protein_id=AKA55024.1] [location=97..10272]
KM279557.1_cds_AKA55025.1_1 [protein=polyprotein] [protein_id=AKA55025.1] [location=97..10272]
KM279558.1_cds_AKA55026.1_1 [protein=polyprotein] [protein_id=AKA55026.1] [location=97..10272]
KM279559.1_cds_AKA55027.1_1 [protein=polyprotein] [protein_id=AKA55027.1] [location=97..10272]
KM279560.1_cds_AKA55028.1_1 [protein=polyprotein] [protein_id=AKA55028.1] [location=97..10272]
KM279561.1_cds_AKA55029.1_1 [protein=polyprotein] [protein_id=AKA55029.1] [location=97..10272]
KM279562.1_cds_AKA55030.1_1 [protein=polyprotein] [protein_id=AKA55030.1] [location=97..10272]
KM279563.1_cds_AKA55031.1_1 [protein=polyprotein] [protein_id=AKA55031.1] [location=97..10272]
KM279564.1_cds_AKA55032.1_1 [protein=polyprotein] [protein_id=AKA55032.1] [location=97..10272]
KM279565.1_cds_AKA55033.1_1 [protein=polyprotein] [protein_id=AKA55033.1] [location=97..10272]
KM279566.1_cds_AKA55034.1_1 [protein=polyprotein] [protein_id=AKA55034.1] [location=97..10272]
KM279567.1_cds_AKA55035.1_1 [protein=polyprotein] [protein_id=AKA55035.1] [location=97..10272]
KM279568.1_cds_AKA55036.1_1 [protein=polyprotein] [protein_id=AKA55036.1] [location=97..10272]
KM279569.1_cds_AKA55037.1_1 [protein=polyprotein] [protein_id=AKA55037.1] [location=97..10272]
KM279570.1_cds_AKA55038.1_1 [protein=polyprotein] [protein_id=AKA55038.1] [location=97..10272]
KM279571.1_cds_AKA55039.1_1 [protein=polyprotein] [protein_id=AKA55039.1] [location=97..10272]
KM279572.1_cds_AKA55040.1_1 [protein=polyprotein] [protein_id=AKA55040.1] [location=97..10272]
KM279573.1_cds_AKA55041.1_1 [protein=polyprotein] [protein_id=AKA55041.1] [location=97..10272]
KM279575.1_cds_AKA55043.1_1 [protein=polyprotein] [protein_id=AKA55043.1] [location=97..10272]
KM279576.1_cds_AKA55044.1_1 [protein=polyprotein] [protein_id=AKA55044.1] [location=97..10272]
KM279577.1_cds_AKA55045.1_1 [protein=polyprotein] [protein_id=AKA55045.1] [location=97..10272]
KM279578.1_cds_AKA55046.1_1 [protein=polyprotein] [protein_id=AKA55046.1] [location=97..10272]
KM279579.1_cds_AKA55047.1_1 [protein=polyprotein] [protein_id=AKA55047.1] [location=97..10272]
KM279581.1_cds_AKA55049.1_1 [protein=polyprotein] [protein_id=AKA55049.1] [location=97..10272]
KM279582.1_cds_AKA55050.1_1 [protein=polyprotein] [protein_id=AKA55050.1] [location=97..10272]
KM279586.1_cds_AKA55054.1_1 [protein=polyprotein] [protein_id=AKA55054.1] [location=97..10272]
KM279587.1_cds_AKA55055.1_1 [protein=polyprotein] [protein_id=AKA55055.1] [location=97..10272]
KM279588.1_cds_AKA55056.1_1 [protein=polyprotein] [protein_id=AKA55056.1] [location=97..10272]
KM279590.1_cds_AKA55058.1_1 [protein=polyprotein] [protein_id=AKA55058.1] [location=97..10272]
KM279591.1_cds_AKA55059.1_1 [protein=polyprotein] [protein_id=AKA55059.1] [location=97..10272]
KM279592.1_cds_AKA55060.1_1 [protein=polyprotein] [protein_id=AKA55060.1] [location=97..10272]
KM279593.1_cds_AKA55061.1_1 [protein=polyprotein] [protein_id=AKA55061.1] [location=97..10272]
KM279594.1_cds_AKA55062.1_1 [protein=polyprotein] [protein_id=AKA55062.1] [location=97..10272]
KM279595.1_cds_AKA55063.1_1 [protein=polyprotein] [protein_id=AKA55063.1] [location=97..10272]
KM279597.1_cds_AKA55065.1_1 [protein=polyprotein] [protein_id=AKA55065.1] [location=97..10272]
KM279598.1_cds_AKA55066.1_1 [protein=polyprotein] [protein_id=AKA55066.1] [location=97..10272]
KM279599.1_cds_AKA55067.1_1 [protein=polyprotein] [protein_id=AKA55067.1] [location=97..10272]
KM279600.1_cds_AKA55068.1_1 [protein=polyprotein] [protein_id=AKA55068.1] [location=97..10272]
KM279601.1_cds_AKA55069.1_1 [protein=polyprotein] [protein_id=AKA55069.1] [location=97..10272]
KP012546.1_cds_AJO16118.1_1 [protein=polyprotein] [protein_id=AJO16118.1] [location=97..10272]
KC762655.1_cds_AHG06339.1_1 [protein=polyprotein] [protein_id=AHG06339.1] [location=97..10272]
KC762656.1_cds_AHG06340.1_1 [protein=polyprotein] [protein_id=AHG06340.1] [location=97..10272]
KC762657.1_cds_AHG06341.1_1 [protein=polyprotein] [protein_id=AHG06341.1] [location=97..10272]
KC762658.1_cds_AHG06342.1_1 [protein=polyprotein] [protein_id=AHG06342.1] [location=97..10272]
KC762659.1_cds_AHG06343.1_1 [protein=polyprotein] [protein_id=AHG06343.1] [location=97..10272]
KC762660.1_cds_AHG06344.1_1 [protein=polyprotein] [protein_id=AHG06344.1] [location=97..10272]
KC762661.1_cds_AHG06345.1_1 [protein=polyprotein] [protein_id=AHG06345.1] [location=97..10272]
KC762662.1_cds_AHG06346.1_1 [protein=polyprotein] [protein_id=AHG06346.1] [location=97..10272]
KC762663.1_cds_AHG06347.1_1 [protein=polyprotein] [protein_id=AHG06347.1] [location=97..10272]
KC762664.1_cds_AHG06348.1_1 [protein=polyprotein] [protein_id=AHG06348.1] [location=97..10272]
KC762665.1_cds_AHG06349.1_1 [protein=polyprotein] [protein_id=AHG06349.1] [location=97..10272]
KC762666.1_cds_AHG06350.1_1 [protein=polyprotein] [protein_id=AHG06350.1] [location=97..10272]
KC762667.1_cds_AHG06351.1_1 [protein=polyprotein] [protein_id=AHG06351.1] [location=97..10272]
KC762668.1_cds_AHG06352.1_1 [protein=polyprotein] [protein_id=AHG06352.1] [location=97..10272]
KC762669.1_cds_AHG06353.1_1 [protein=polyprotein] [protein_id=AHG06353.1] [location=97..10272]
KC762670.1_cds_AHG06354.1_1 [protein=polyprotein] [protein_id=AHG06354.1] [location=97..10272]
KC762671.1_cds_AHG06355.1_1 [protein=polyprotein] [protein_id=AHG06355.1] [location=97..10272]
KC762672.1_cds_AHG06356.1_1 [protein=polyprotein] [protein_id=AHG06356.1] [location=97..10272]
KC762673.1_cds_AHG06357.1_1 [protein=polyprotein] [protein_id=AHG06357.1] [location=97..10272]
KC762674.1_cds_AHG06358.1_1 [protein=polyprotein] [protein_id=AHG06358.1] [location=97..10272]
KC762675.1_cds_AHG06359.1_1 [protein=polyprotein] [protein_id=AHG06359.1] [location=97..10272]
KC762676.1_cds_AHG06360.1_1 [protein=polyprotein] [protein_id=AHG06360.1] [location=97..10272]
KC762677.1_cds_AHG06361.1_1 [protein=polyprotein] [protein_id=AHG06361.1] [location=97..10272]
KC762678.1_cds_AHG06362.1_1 [protein=polyprotein] [protein_id=AHG06362.1] [location=97..10272]
KC762679.1_cds_AHG06363.1_1 [protein=polyprotein] [protein_id=AHG06363.1] [location=97..10272]
KC762680.1_cds_AHG06364.1_1 [protein=polyprotein] [protein_id=AHG06364.1] [location=97..10272]
KM204118.1_cds_AIU47320.1_1 [protein=polyprotein] [protein_id=AIU47320.1] [location=97..10272]
KJ830750.1_cds_AIH13924.1_1 [protein=polyprotein] [protein_id=AIH13924.1] [location=115..10290]
KJ918750.1_cds_AII99332.1_1 [protein=polyprotein] [protein_id=AII99332.1] [location=97..10272]
KJ010185.1_cds_AHM25909.1_1 [protein=polyprotein] [protein_id=AHM25909.1] [location=65..10240]
KJ010186.1_cds_AHM25910.1_1 [protein=polyprotein] [protein_id=AHM25910.1] [location=65..10240]
KJ189305.1_cds_AHI43688.1_1 [protein=polyprotein] [protein_id=AHI43688.1] [location=89..10264]
KJ189310.1_cds_AHI43693.1_1 [protein=polyprotein] [protein_id=AHI43693.1] [location=86..10261]
KJ189311.1_cds_AHI43694.1_1 [protein=polyprotein] [protein_id=AHI43694.1] [location=87..10262]
KJ189370.1_cds_AHI43753.1_1 [protein=polyprotein] [protein_id=AHI43753.1] [location=93..10268]
JQ955623.1_cds_AFZ40225.1_1 [protein=polyprotein] [protein_id=AFZ40225.1] [location=97..10272]
JQ955624.1_cds_AFZ40226.1_1 [protein=polyprotein] [protein_id=AFZ40226.1] [location=97..10272]
JX475906.1_cds_AFZ40227.1_1 [protein=polyprotein] [protein_id=AFZ40227.1] [location=97..10272]
KF955359.1_cds_AHG23128.1_1 [protein=polyprotein] [protein_id=AHG23128.1] [location=75..10250]
KF955360.1_cds_AHG23129.1_1 [protein=polyprotein] [protein_id=AHG23129.1] [location=75..10250]
KF955362.1_cds_AHG23131.1_1 [protein=polyprotein] [protein_id=AHG23131.1] [location=102..10277]
KF955363.1_cds_AHG23132.1_1 [protein=polyprotein] [protein_id=AHG23132.1] [location=75..10250]
KF955364.1_cds_AHG23133.1_1 [protein=polyprotein] [protein_id=AHG23133.1] [location=65..10240]
KF955365.1_cds_AHG23134.1_1 [protein=polyprotein] [protein_id=AHG23134.1] [location=33..10208]
KF955366.1_cds_AHG23135.1_1 [protein=polyprotein] [protein_id=AHG23135.1] [location=53..10228]
KF955369.1_cds_AHG23138.1_1 [protein=polyprotein] [protein_id=AHG23138.1] [location=48..10223]
KF955372.1_cds_AHG23140.1_1 [protein=polyprotein] [protein_id=AHG23140.1] [location=45..10220]
KF955373.1_cds_AHG23141.1_1 [protein=polyprotein] [protein_id=AHG23141.1] [location=26..10201]
KF955395.1_cds_AHG23163.1_1 [protein=polyprotein] [protein_id=AHG23163.1] [location=45..10220]
KF955401.1_cds_AHG23169.1_1 [protein=polyprotein] [protein_id=AHG23169.1] [location=97..10272]
KF955402.1_cds_AHG23170.1_1 [protein=polyprotein] [protein_id=AHG23170.1] [location=97..10272]
KC294200.1_cds_AGX15365.1_1 [protein=polyprotein] [protein_id=AGX15365.1] [location=97..10272]
KC294201.1_cds_AGX15366.1_1 [protein=polyprotein] [protein_id=AGX15366.1] [location=97..10272]
KC294202.1_cds_AGX15367.1_1 [protein=polyprotein] [protein_id=AGX15367.1] [location=97..10272]
KC294203.1_cds_AGX15368.1_1 [protein=polyprotein] [protein_id=AGX15368.1] [location=97..10272]
KC294204.1_cds_AGX15369.1_1 [protein=polyprotein] [protein_id=AGX15369.1] [location=97..10272]
KC294205.1_cds_AGX15370.1_1 [protein=polyprotein] [protein_id=AGX15370.1] [location=97..10272]
KC294206.1_cds_AGX15371.1_1 [protein=polyprotein] [protein_id=AGX15371.1] [location=97..10272]
KC294207.1_cds_AGX15372.1_1 [protein=polyprotein] [protein_id=AGX15372.1] [location=97..10272]
KC294208.1_cds_AGX15373.1_1 [protein=polyprotein] [protein_id=AGX15373.1] [location=97..10272]
KC294209.1_cds_AGX15374.1_1 [protein=polyprotein] [protein_id=AGX15374.1] [location=97..10272]
KC294210.1_cds_AGX15375.1_1 [protein=polyprotein] [protein_id=AGX15375.1] [location=97..10272]
KC294211.1_cds_AGX15376.1_1 [protein=polyprotein] [protein_id=AGX15376.1] [location=97..10272]
KC294212.1_cds_AGX15377.1_1 [protein=polyprotein] [protein_id=AGX15377.1] [location=97..10272]
KC294213.1_cds_AGX15378.1_1 [protein=polyprotein] [protein_id=AGX15378.1] [location=97..10272]
KC294214.1_cds_AGX15379.1_1 [protein=polyprotein] [protein_id=AGX15379.1] [location=97..10272]
KC294215.1_cds_AGX15380.1_1 [protein=polyprotein] [protein_id=AGX15380.1] [location=97..10272]
KC294216.1_cds_AGX15381.1_1 [protein=polyprotein] [protein_id=AGX15381.1] [location=97..10272]
KC294217.1_cds_AGX15382.1_1 [protein=polyprotein] [protein_id=AGX15382.1] [location=97..10272]
KC294218.1_cds_AGX15383.1_1 [protein=polyprotein] [protein_id=AGX15383.1] [location=97..10272]
KC294219.1_cds_AGX15384.1_1 [protein=polyprotein] [protein_id=AGX15384.1] [location=97..10272]
KC294220.1_cds_AGX15385.1_1 [protein=polyprotein] [protein_id=AGX15385.1] [location=97..10272]
KC294221.1_cds_AGX15386.1_1 [protein=polyprotein] [protein_id=AGX15386.1] [location=97..10272]
KC294222.1_cds_AGX15387.1_1 [protein=polyprotein] [protein_id=AGX15387.1] [location=97..10272]
KC294223.1_cds_AGX15388.1_1 [protein=polyprotein] [protein_id=AGX15388.1] [location=97..10272]
KF041232.1_cds_AHC72404.1_1 [protein=polyprotein] [protein_id=AHC72404.1] [location=97..10272]
KF041233.1_cds_AHC72405.1_1 [protein=polyprotein] [protein_id=AHC72405.1] [location=97..10272]
KF041234.1_cds_AHC72406.1_1 [protein=polyprotein] [protein_id=AHC72406.1] [location=97..10272]
KF041235.1_cds_AHC72407.1_1 [protein=polyprotein] [protein_id=AHC72407.1] [location=97..10272]
KF041236.1_cds_AHC72408.1_1 [protein=polyprotein] [protein_id=AHC72408.1] [location=97..10272]
KF041237.1_cds_AHC72409.1_1 [protein=polyprotein] [protein_id=AHC72409.1] [location=97..10272]
KF360005.1_cds_AHA80987.1_1 [protein=polyprotein] [protein_id=AHA80987.1] [location=65..10240]
KF479233.1_cds_AHA42535.1_1 [protein=polyprotein] [protein_id=AHA42535.1] [location=97..10272]
JX669476.1_cds_AGN94880.1_1 [protein=polyprotein] [protein_id=AGN94880.1] [location=97..10272]
JX669477.1_cds_AGN94881.1_1 [protein=polyprotein] [protein_id=AGN94881.1] [location=97..10272]
JX669478.1_cds_AGN94882.1_1 [protein=polyprotein] [protein_id=AGN94882.1] [location=97..10272]
JX669479.1_cds_AGN94883.1_1 [protein=polyprotein] [protein_id=AGN94883.1] [location=97..10272]
JX669480.1_cds_AGN94884.1_1 [protein=polyprotein] [protein_id=AGN94884.1] [location=97..10272]
JX669481.1_cds_AGN94885.1_1 [protein=polyprotein] [protein_id=AGN94885.1] [location=97..10272]
JX669482.1_cds_AGN94886.1_1 [protein=polyprotein] [protein_id=AGN94886.1] [location=97..10272]
JX669483.1_cds_AGN94887.1_1 [protein=polyprotein] [protein_id=AGN94887.1] [location=97..10272]
JX669484.1_cds_AGN94888.1_1 [protein=polyprotein] [protein_id=AGN94888.1] [location=97..10272]
JX669485.1_cds_AGN94889.1_1 [protein=polyprotein] [protein_id=AGN94889.1] [location=97..10272]
JX669486.1_cds_AGN94890.1_1 [protein=polyprotein] [protein_id=AGN94890.1] [location=97..10272]
JX669487.1_cds_AGN94891.1_1 [protein=polyprotein] [protein_id=AGN94891.1] [location=97..10272]
JX669488.1_cds_AGN94892.1_1 [protein=polyprotein] [protein_id=AGN94892.1] [location=97..10272]
JX649147.1_cds_AGO67248.1_1 [protein=polyprotein] [protein_id=AGO67248.1] [location=97..10272]
JX649148.1_cds_AGO67249.1_1 [protein=polyprotein] [protein_id=AGO67249.1] [location=97..10272]
JX966379.1_cds_AGS49172.1_1 [protein=polyprotein] [protein_id=AGS49172.1] [location=97..10272]
JX966380.1_cds_AGS49173.1_1 [protein=polyprotein] [protein_id=AGS49173.1] [location=97..10272]
JX286516.1_cds_AGK36289.1_1 [protein=polyprotein] [protein_id=AGK36289.1] [location=64..10239]
JX286517.1_cds_AGK36290.1_1 [protein=polyprotein] [protein_id=AGK36290.1] [location=64..10239]
JX286518.1_cds_AGK36291.1_1 [protein=polyprotein] [protein_id=AGK36291.1] [location=66..10241]
JX286519.1_cds_AGK36292.1_1 [protein=polyprotein] [protein_id=AGK36292.1] [location=62..10237]
JX286520.1_cds_AGK36293.1_1 [protein=polyprotein] [protein_id=AGK36293.1] [location=66..10241]
JX286521.1_cds_AGK36294.1_1 [protein=polyprotein] [protein_id=AGK36294.1] [location=64..10239]
JX286522.1_cds_AGK36295.1_1 [protein=polyprotein] [protein_id=AGK36295.1] [location=64..10239]
JX286523.1_cds_AGK36296.1_1 [protein=polyprotein] [protein_id=AGK36296.1] [location=62..10237]
JX286524.1_cds_AGK36297.1_1 [protein=polyprotein] [protein_id=AGK36297.1] [location=54..10229]
JX286525.1_cds_AGK36298.1_1 [protein=polyprotein] [protein_id=AGK36298.1] [location=64..10239]
JX286526.1_cds_AGK36299.1_1 [protein=polyprotein] [protein_id=AGK36299.1] [location=106..10281]
JQ922549.1_cds_AFZ40119.1_1 [protein=polyprotein] [protein_id=AFZ40119.1] [location=70..10245]
JQ922550.1_cds_AFZ40120.1_1 [protein=polyprotein] [protein_id=AFZ40120.1] [location=70..10245]
JQ922551.1_cds_AFZ40121.1_1 [protein=polyprotein] [protein_id=AFZ40121.1] [location=70..10245]
JQ922552.1_cds_AFZ40122.1_1 [protein=polyprotein] [protein_id=AFZ40122.1] [location=70..10245]
JQ922553.1_cds_AFZ40123.1_1 [protein=polyprotein] [protein_id=AFZ40123.1] [location=35..10210]
KC131142.1_cds_AGF87124.1_1 [protein=polyprotein] [protein_id=AGF87124.1] [location=97..10272]
JX470186.1_cds_AFU65934.1_1 [protein=polyprotein] [protein_id=AFU65934.1] [location=97..10272]
JN368476.1_cds_AFM82485.1_1 [protein=polyprotein] [protein_id=AFM82485.1] [location=80..10255]
JX079688.1_cds_AFK65749.1_1 [protein=polyprotein] [protein_id=AFK65749.1] [location=87..10262]
JX079690.1_cds_AFK65751.1_1 [protein=polyprotein] [protein_id=AFK65751.1] [location=87..10262]
JX079694.1_cds_AFK65755.1_1 [protein=polyprotein] [protein_id=AFK65755.1] [location=87..10262]
JQ686088.2_cds_AFH53774.2_1 [protein=polyprotein] [protein_id=AFH53774.2] [location=55..10227]
HQ332184.1_cds_AEA50937.1_1 [protein=polyprotein] [protein_id=AEA50937.1] [location=97..10272]
HQ332185.1_cds_AEA50938.1_1 [protein=polyprotein] [protein_id=AEA50938.1] [location=97..10272]
HQ332186.1_cds_AEA50939.1_1 [protein=polyprotein] [protein_id=AEA50939.1] [location=97..10272]
HQ332187.1_cds_AEA50940.1_1 [protein=polyprotein] [protein_id=AEA50940.1] [location=97..10272]
HQ332188.1_cds_AEA50941.1_1 [protein=polyprotein] [protein_id=AEA50941.1] [location=97..10272]
HQ332189.1_cds_AEA50942.1_1 [protein=polyprotein] [protein_id=AEA50942.1] [location=97..10272]
HQ332190.1_cds_AEA50943.1_1 [protein=polyprotein] [protein_id=AEA50943.1] [location=97..10272]
JQ045670.1_cds_AFD28528.1_1 [protein=polyprotein] [protein_id=AFD28528.1] [location=75..10250]
JQ045684.1_cds_AFD28529.1_1 [protein=polyprotein] [protein_id=AFD28529.1] [location=75..10250]
JQ045686.1_cds_AFD28530.1_1 [protein=polyprotein] [protein_id=AFD28530.1] [location=75..10250]
JN819407.1_cds_AET43238.1_1 [protein=polyprotein] [protein_id=AET43238.1] [location=48..10223]
JN819408.1_cds_AET43239.1_1 [protein=polyprotein] [protein_id=AET43239.1] [location=58..10233]
JN819416.1_cds_AET43247.1_1 [protein=polyprotein] [protein_id=AET43247.1] [location=63..10238]
JN819418.1_cds_AET43249.1_1 [protein=polyprotein] [protein_id=AET43249.1] [location=75..10250]
JN819419.1_cds_AET43250.1_1 [protein=polyprotein] [protein_id=AET43250.1] [location=50..10225]
JN819420.1_cds_AET43251.1_1 [protein=polyprotein] [protein_id=AET43251.1] [location=75..10250]
JN819421.1_cds_AET43252.1_1 [protein=polyprotein] [protein_id=AET43252.1] [location=37..10212]
JN819422.1_cds_AET43253.1_1 [protein=polyprotein] [protein_id=AET43253.1] [location=74..10249]
JN819424.1_cds_AET43255.1_1 [protein=polyprotein] [protein_id=AET43255.1] [location=64..10239]
HQ999999.1_cds_AER45462.1_1 [protein=polyprotein] [protein_id=AER45462.1] [location=97..10272]
HQ541798.1_cds_AEH59341.1_1 [protein=polyprotein] [protein_id=AEH59341.1] [location=120..10292]
HQ891023.1_cds_AEH59343.1_1 [protein=polyprotein] [protein_id=AEH59343.1] [location=108..10283]
JF730050.1_cds_AEH59345.1_1 [protein=polyprotein] [protein_id=AEH59345.1] [location=95..10270]
JF730053.1_cds_AEH59346.1_1 [protein=polyprotein] [protein_id=AEH59346.1] [location=87..10262]
JF730044.1_cds_AEB66123.1_1 [protein=polyprotein] [protein_id=AEB66123.1] [location=86..10261]
JF730045.1_cds_AEB66124.1_1 [protein=polyprotein] [protein_id=AEB66124.1] [location=87..10262]
JF730046.1_cds_AEB66125.1_1 [protein=polyprotein] [protein_id=AEB66125.1] [location=87..10262]
JF730047.1_cds_AEB66126.1_1 [protein=polyprotein] [protein_id=AEB66126.1] [location=87..10262]
JF730048.1_cds_AEB66127.1_1 [protein=polyprotein] [protein_id=AEB66127.1] [location=86..10261]
JF730049.1_cds_AEB66128.1_1 [protein=polyprotein] [protein_id=AEB66128.1] [location=87..10262]
JF730051.1_cds_AEB66129.1_1 [protein=polyprotein] [protein_id=AEB66129.1] [location=87..10262]
JF730052.1_cds_AEB66130.1_1 [protein=polyprotein] [protein_id=AEB66130.1] [location=87..10262]
JF357905.1_cds_ADZ13194.1_1 [protein=polyprotein] [protein_id=ADZ13194.1] [location=87..10262]
JF357906.1_cds_ADZ13195.1_1 [protein=polyprotein] [protein_id=ADZ13195.1] [location=99..10274]
JF357907.1_cds_ADZ13196.1_1 [protein=polyprotein] [protein_id=ADZ13196.1] [location=87..10262]
HQ541786.1_cds_ADU76196.1_1 [protein=polyprotein] [protein_id=ADU76196.1] [location=101..10276]
HQ541787.1_cds_ADU76197.1_1 [protein=polyprotein] [protein_id=ADU76197.1] [location=107..10282]
HQ541788.1_cds_ADU76198.1_1 [protein=polyprotein] [protein_id=ADU76198.1] [location=96..10271]
HQ541792.1_cds_ADU76202.1_1 [protein=polyprotein] [protein_id=ADU76202.1] [location=87..10262]
HQ541793.1_cds_ADU76203.1_1 [protein=polyprotein] [protein_id=ADU76203.1] [location=86..10261]
HQ541794.1_cds_ADU76204.1_1 [protein=polyprotein] [protein_id=ADU76204.1] [location=86..10261]
HQ634199.1_cds_ADU76214.1_1 [protein=polyprotein] [protein_id=ADU76214.1] [location=89..10264]
HQ705624.1_cds_ADU76233.1_1 [protein=polyprotein] [protein_id=ADU76233.1] [location=92..10264]
HQ705625.1_cds_ADU76234.1_1 [protein=polyprotein] [protein_id=ADU76234.1] [location=104..10279]
HQ733861.1_cds_ADU76235.1_1 [protein=polyprotein] [protein_id=ADU76235.1] [location=104..10279]
GQ398257.1_cds_ADK37473.1_1 [protein=polyprotein] [protein_id=ADK37473.1] [location=97..10272]
GQ398258.1_cds_ADK37474.1_1 [protein=polyprotein] [protein_id=ADK37474.1] [location=97..10272]
GQ398259.1_cds_ADK37475.1_1 [protein=polyprotein] [protein_id=ADK37475.1] [location=97..10272]
GQ398260.1_cds_ADK37476.1_1 [protein=polyprotein] [protein_id=ADK37476.1] [location=97..10272]
GQ398261.1_cds_ADK37477.1_1 [protein=polyprotein] [protein_id=ADK37477.1] [location=97..10272]
GQ398262.1_cds_ADK37478.1_1 [protein=polyprotein] [protein_id=ADK37478.1] [location=97..10272]
GQ398263.1_cds_ADK37479.1_1 [protein=polyprotein] [protein_id=ADK37479.1] [location=97..10272]
GQ398264.1_cds_ADK37480.1_1 [protein=polyprotein] [protein_id=ADK37480.1] [location=97..10272]
GQ398265.1_cds_ADK37481.1_1 [protein=polyprotein] [protein_id=ADK37481.1] [location=97..10272]
GQ398266.1_cds_ADK37482.1_1 [protein=polyprotein] [protein_id=ADK37482.1] [location=97..10272]
GQ398267.1_cds_ADK37483.1_1 [protein=polyprotein] [protein_id=ADK37483.1] [location=97..10272]
GQ398268.1_cds_ADK37484.1_1 [protein=polyprotein] [protein_id=ADK37484.1] [location=97..10272]
GQ398269.1_cds_ADK37485.1_1 [protein=polyprotein] [protein_id=ADK37485.1] [location=97..10272]
GQ398270.1_cds_ADK37486.1_1 [protein=polyprotein] [protein_id=ADK37486.1] [location=98..10273]
GQ398271.1_cds_ADK37487.1_1 [protein=polyprotein] [protein_id=ADK37487.1] [location=97..10272]
GQ398272.1_cds_ADK37488.1_1 [protein=polyprotein] [protein_id=ADK37488.1] [location=97..10272]
GQ398273.1_cds_ADK37489.1_1 [protein=polyprotein] [protein_id=ADK37489.1] [location=97..10272]
GQ398274.1_cds_ADK37490.1_1 [protein=polyprotein] [protein_id=ADK37490.1] [location=97..10272]
GQ398275.1_cds_ADK37491.1_1 [protein=polyprotein] [protein_id=ADK37491.1] [location=97..10272]
GQ398276.1_cds_ADK37492.1_1 [protein=polyprotein] [protein_id=ADK37492.1] [location=97..10272]
GQ398277.1_cds_ADK37493.1_1 [protein=polyprotein] [protein_id=ADK37493.1] [location=97..10272]
GQ398278.1_cds_ADK37494.1_1 [protein=polyprotein] [protein_id=ADK37494.1] [location=97..10272]
GQ398279.1_cds_ADK37495.1_1 [protein=polyprotein] [protein_id=ADK37495.1] [location=97..10272]
GQ398280.1_cds_ADK37496.1_1 [protein=polyprotein] [protein_id=ADK37496.1] [location=97..10272]
GQ398281.1_cds_ADK37497.1_1 [protein=polyprotein] [protein_id=ADK37497.1] [location=97..10272]
GQ398282.1_cds_ADK37498.1_1 [protein=polyprotein] [protein_id=ADK37498.1] [location=97..10272]
GQ398283.1_cds_ADK37499.1_1 [protein=polyprotein] [protein_id=ADK37499.1] [location=97..10272]
GQ398284.1_cds_ADK37500.1_1 [protein=polyprotein] [protein_id=ADK37500.1] [location=97..10272]
GQ398285.1_cds_ADK37501.1_1 [protein=polyprotein] [protein_id=ADK37501.1] [location=97..10272]
GQ398286.1_cds_ADK37502.1_1 [protein=polyprotein] [protein_id=ADK37502.1] [location=96..10271]
GQ398287.1_cds_ADK37503.1_1 [protein=polyprotein] [protein_id=ADK37503.1] [location=96..10271]
GQ398288.1_cds_ADK37504.1_1 [protein=polyprotein] [protein_id=ADK37504.1] [location=96..10271]
GQ398289.1_cds_ADK37505.1_1 [protein=polyprotein] [protein_id=ADK37505.1] [location=96..10271]
GQ398290.1_cds_ADK37506.1_1 [protein=polyprotein] [protein_id=ADK37506.1] [location=96..10271]
GQ398291.1_cds_ADK37507.1_1 [protein=polyprotein] [protein_id=ADK37507.1] [location=96..10271]
GQ398292.1_cds_ADK37508.1_1 [protein=polyprotein] [protein_id=ADK37508.1] [location=97..10272]
GQ398293.1_cds_ADK37509.1_1 [protein=polyprotein] [protein_id=ADK37509.1] [location=97..10272]
GQ398294.1_cds_ADK37510.1_1 [protein=polyprotein] [protein_id=ADK37510.1] [location=97..10272]
GQ398295.1_cds_ADK37511.1_1 [protein=polyprotein] [protein_id=ADK37511.1] [location=97..10272]
GQ398296.1_cds_ADK37512.1_1 [protein=polyprotein] [protein_id=ADK37512.1] [location=97..10272]
GQ398297.1_cds_ADK37513.1_1 [protein=polyprotein] [protein_id=ADK37513.1] [location=97..10272]
GQ398298.1_cds_ADK37514.1_1 [protein=polyprotein] [protein_id=ADK37514.1] [location=97..10272]
GQ398299.1_cds_ADK37515.1_1 [protein=polyprotein] [protein_id=ADK37515.1] [location=97..10272]
GQ398300.1_cds_ADK37516.1_1 [protein=polyprotein] [protein_id=ADK37516.1] [location=97..10272]
GQ398301.1_cds_ADK37517.1_1 [protein=polyprotein] [protein_id=ADK37517.1] [location=97..10272]
GQ398302.1_cds_ADK37518.1_1 [protein=polyprotein] [protein_id=ADK37518.1] [location=97..10272]
GQ398303.1_cds_ADK37519.1_1 [protein=polyprotein] [protein_id=ADK37519.1] [location=97..10272]
GQ398304.1_cds_ADK37520.1_1 [protein=polyprotein] [protein_id=ADK37520.1] [location=97..10272]
GQ398305.1_cds_ADK37521.1_1 [protein=polyprotein] [protein_id=ADK37521.1] [location=97..10272]
GQ398306.1_cds_ADK37522.1_1 [protein=polyprotein] [protein_id=ADK37522.1] [location=97..10272]
GQ398307.1_cds_ADK37523.1_1 [protein=polyprotein] [protein_id=ADK37523.1] [location=97..10272]
GQ398308.1_cds_ADK37524.1_1 [protein=polyprotein] [protein_id=ADK37524.1] [location=97..10272]
GQ398309.1_cds_ADK37525.1_1 [protein=polyprotein] [protein_id=ADK37525.1] [location=97..10272]
GQ398310.1_cds_ADK37526.1_1 [protein=polyprotein] [protein_id=ADK37526.1] [location=97..10272]
GQ398311.1_cds_ADK37527.1_1 [protein=polyprotein] [protein_id=ADK37527.1] [location=97..10272]
GQ398312.1_cds_ADK37528.1_1 [protein=polyprotein] [protein_id=ADK37528.1] [location=97..10272]
GQ398313.1_cds_ADK37529.1_1 [protein=polyprotein] [protein_id=ADK37529.1] [location=97..10272]
GQ398314.1_cds_ADK37530.1_1 [protein=polyprotein] [protein_id=ADK37530.1] [location=97..10272]
HM488257.1_cds_ADK26435.1_1 [protein=polyprotein] [protein_id=ADK26435.1] [location=75..10250]
HM631865.1_cds_ADK26428.1_1 [protein=polyprotein] [protein_id=ADK26428.1] [location=75..10250]
HM631866.1_cds_ADK26429.1_1 [protein=polyprotein] [protein_id=ADK26429.1] [location=75..10250]
HM631867.1_cds_ADK26430.1_1 [protein=polyprotein] [protein_id=ADK26430.1] [location=75..10250]
HM631868.1_cds_ADK26431.1_1 [protein=polyprotein] [protein_id=ADK26431.1] [location=74..10249]
HM181971.1_cds_ADI80655.1_1 [protein=polyprotein] [protein_id=ADI80655.1] [location=75..10250]
AB543624.1_cds_BAJ05336.1_1 [gene=R05-624] [protein=polyprotein] [protein_id=BAJ05336.1] [locat
GU369819.1_cds_ADC32612.1_1 [protein=polyprotein] [protein_id=ADC32612.1] [location=15..10190]
GU131947.1_cds_ADA60759.1_1 [protein=polyprotein] [protein_id=ADA60759.1] [location=75..10250]
GU131959.1_cds_ADA60770.1_1 [protein=polyprotein] [protein_id=ADA60770.1] [location=48..10223]
GU131974.1_cds_ADA60785.1_1 [protein=polyprotein] [protein_id=ADA60785.1] [location=74..10249]
GU131975.1_cds_ADA60786.1_1 [protein=polyprotein] [protein_id=ADA60786.1] [location=64..10239]
GU289914.1_cds_ADA00411.1_1 [protein=polyprotein precursor] [protein_id=ADA00411.1] [location=9
GU131864.1_cds_ACY70763.1_1 [protein=polyprotein] [protein_id=ACY70763.1] [location=75..10250]
GU131879.1_cds_ACY70778.1_1 [protein=polyprotein] [protein_id=ACY70778.1] [location=75..10250]
GU131880.1_cds_ACY70779.1_1 [protein=polyprotein] [protein_id=ACY70779.1] [location=75..10250]
GU131881.1_cds_ACY70780.1_1 [protein=polyprotein] [protein_id=ACY70780.1] [location=75..10250]
GU131882.1_cds_ACY70781.1_1 [protein=polyprotein] [protein_id=ACY70781.1] [location=74..10249]
GU131883.1_cds_ACY70782.1_1 [protein=polyprotein] [protein_id=ACY70782.1] [location=75..10250]
GU131884.1_cds_ACY70783.1_1 [protein=polyprotein] [protein_id=ACY70783.1] [location=62..10237]
GU131885.1_cds_ACY70784.1_1 [protein=polyprotein] [protein_id=ACY70784.1] [location=75..10250]
GU131886.1_cds_ACY70785.1_1 [protein=polyprotein] [protein_id=ACY70785.1] [location=75..10250]
GU131896.1_cds_ACY70795.1_1 [protein=polyprotein] [protein_id=ACY70795.1] [location=43..10218]
GU131897.1_cds_ACY70796.1_1 [protein=polyprotein] [protein_id=ACY70796.1] [location=61..10236]
GU131898.1_cds_ACY70797.1_1 [protein=polyprotein] [protein_id=ACY70797.1] [location=41..10216]
GU131899.1_cds_ACY70798.1_1 [protein=polyprotein] [protein_id=ACY70798.1] [location=43..10218]
GU131900.1_cds_ACY70799.1_1 [protein=polyprotein] [protein_id=ACY70799.1] [location=55..10230]
GU131901.1_cds_ACY70800.1_1 [protein=polyprotein] [protein_id=ACY70800.1] [location=27..10202]
GU131902.1_cds_ACY70801.1_1 [protein=polyprotein] [protein_id=ACY70801.1] [location=76..10251]
GU131924.1_cds_ACY70823.1_1 [protein=polyprotein] [protein_id=ACY70823.1] [location=64..10239]
GU131927.1_cds_ACY70826.1_1 [protein=polyprotein] [protein_id=ACY70826.1] [location=75..10250]
GU131928.1_cds_ACY70827.1_1 [protein=polyprotein] [protein_id=ACY70827.1] [location=75..10250]
GU131929.1_cds_ACY70828.1_1 [protein=polyprotein] [protein_id=ACY70828.1] [location=75..10250]
GU131930.1_cds_ACY70829.1_1 [protein=polyprotein] [protein_id=ACY70829.1] [location=75..10250]
GU131931.1_cds_ACY70830.1_1 [protein=polyprotein] [protein_id=ACY70830.1] [location=75..10250]
GU131932.1_cds_ACY70831.1_1 [protein=polyprotein] [protein_id=ACY70831.1] [location=75..10250]
GU131955.1_cds_ACY70846.1_1 [protein=polyprotein] [protein_id=ACY70846.1] [location=65..10240]
GQ868497.1_cds_ACW82937.1_1 [protein=polyprotein] [protein_id=ACW82937.1] [location=59..10234]
GQ868515.1_cds_ACW82955.1_1 [protein=polyprotein] [protein_id=ACW82955.1] [location=67..10242]
GQ868516.1_cds_ACW82956.1_1 [protein=polyprotein] [protein_id=ACW82956.1] [location=69..10244]
GQ868540.1_cds_ACW82864.1_1 [protein=polyprotein] [protein_id=ACW82864.1] [location=75..10250]
GQ868541.1_cds_ACW82865.1_1 [protein=polyprotein] [protein_id=ACW82865.1] [location=75..10250]
GQ868542.1_cds_ACW82866.1_1 [protein=polyprotein] [protein_id=ACW82866.1] [location=75..10250]
GQ868543.1_cds_ACW82867.1_1 [protein=polyprotein] [protein_id=ACW82867.1] [location=75..10250]
GQ868544.1_cds_ACW82868.1_1 [protein=polyprotein] [protein_id=ACW82868.1] [location=75..10250]
GQ868545.1_cds_ACW82869.1_1 [protein=polyprotein] [protein_id=ACW82869.1] [location=75..10250]
GQ868549.1_cds_ACW82873.1_1 [protein=polyprotein] [protein_id=ACW82873.1] [location=75..10250]
GQ868550.1_cds_ACW82874.1_1 [protein=polyprotein] [protein_id=ACW82874.1] [location=75..10250]
GQ868551.1_cds_ACW82875.1_1 [protein=polyprotein] [protein_id=ACW82875.1] [location=75..10250]
GQ868552.1_cds_ACW82980.1_1 [protein=polyprotein] [protein_id=ACW82980.1] [location=60..10235]
GQ868553.1_cds_ACW82981.1_1 [protein=polyprotein] [protein_id=ACW82981.1] [location=60..10235]
GQ868554.1_cds_ACW82982.1_1 [protein=polyprotein] [protein_id=ACW82982.1] [location=75..10250]
GQ868555.1_cds_ACW82983.1_1 [protein=polyprotein] [protein_id=ACW82983.1] [location=64..10239]
GQ868556.1_cds_ACW82984.1_1 [protein=polyprotein] [protein_id=ACW82984.1] [location=75..10250]
GQ868557.1_cds_ACW82985.1_1 [protein=polyprotein] [protein_id=ACW82985.1] [location=64..10239]
GQ868558.1_cds_ACW82986.1_1 [protein=polyprotein] [protein_id=ACW82986.1] [location=75..10250]
GQ868588.1_cds_ACW82878.1_1 [protein=polyprotein] [protein_id=ACW82878.1] [location=75..10250]
GQ868589.1_cds_ACW82879.1_1 [protein=polyprotein] [protein_id=ACW82879.1] [location=75..10250]
GQ868590.1_cds_ACW82880.1_1 [protein=polyprotein] [protein_id=ACW82880.1] [location=75..10250]
GQ868591.1_cds_ACW82881.1_1 [protein=polyprotein] [protein_id=ACW82881.1] [location=75..10250]
GQ868592.1_cds_ACW82882.1_1 [protein=polyprotein] [protein_id=ACW82882.1] [location=75..10250]
GQ868595.1_cds_ACW82885.1_1 [protein=polyprotein] [protein_id=ACW82885.1] [location=75..10250]
GQ868596.1_cds_ACW82886.1_1 [protein=polyprotein] [protein_id=ACW82886.1] [location=64..10239]
GQ868597.1_cds_ACW82887.1_1 [protein=polyprotein] [protein_id=ACW82887.1] [location=75..10250]
GQ868598.1_cds_ACW82888.1_1 [protein=polyprotein] [protein_id=ACW82888.1] [location=75..10250]
GQ868599.1_cds_ACW82889.1_1 [protein=polyprotein] [protein_id=ACW82889.1] [location=75..10250]
GQ868600.1_cds_ACW82890.1_1 [protein=polyprotein] [protein_id=ACW82890.1] [location=75..10250]
GQ868603.1_cds_ACW82893.1_1 [protein=polyprotein] [protein_id=ACW82893.1] [location=74..10249]
GQ868604.1_cds_ACW82894.1_1 [protein=polyprotein] [protein_id=ACW82894.1] [location=75..10250]
GQ868620.1_cds_ACW82908.1_1 [protein=polyprotein] [protein_id=ACW82908.1] [location=61..10236]
GQ868621.1_cds_ACW82909.1_1 [protein=polyprotein] [protein_id=ACW82909.1] [location=75..10250]
GQ868622.1_cds_ACW82910.1_1 [protein=polyprotein] [protein_id=ACW82910.1] [location=75..10250]
GQ868623.1_cds_ACW82911.1_1 [protein=polyprotein] [protein_id=ACW82911.1] [location=75..10250]
GQ868624.1_cds_ACW82912.1_1 [protein=polyprotein] [protein_id=ACW82912.1] [location=76..10251]
GQ868625.1_cds_ACW82913.1_1 [protein=polyprotein] [protein_id=ACW82913.1] [location=72..10247]
GQ868631.1_cds_ACW82919.1_1 [protein=polyprotein] [protein_id=ACW82919.1] [location=75..10250]
GQ868638.1_cds_ACW82926.1_1 [protein=polyprotein] [protein_id=ACW82926.1] [location=65..10240]
GQ868640.1_cds_ACW82928.1_1 [protein=polyprotein] [protein_id=ACW82928.1] [location=64..10239]
GQ868641.1_cds_ACW82929.1_1 [protein=polyprotein] [protein_id=ACW82929.1] [location=75..10250]
GQ868646.1_cds_ACW82934.1_1 [protein=polyprotein] [protein_id=ACW82934.1] [location=75..10250]
AB479042.1_cds_BAH86604.1_1 [protein=polyprotein] [protein_id=BAH86604.1] [location=78..10253]
GQ199866.1_cds_ACS32000.1_1 [protein=polyprotein] [protein_id=ACS32000.1] [location=65..10240]
GQ199868.1_cds_ACS32002.1_1 [protein=polyprotein] [protein_id=ACS32002.1] [location=75..10250]
GQ199869.1_cds_ACS32003.1_1 [protein=polyprotein] [protein_id=ACS32003.1] [location=75..10250]
GQ199874.1_cds_ACS32008.1_1 [protein=polyprotein] [protein_id=ACS32008.1] [location=62..10237]
GQ199890.1_cds_ACS32031.1_1 [protein=polyprotein] [protein_id=ACS32031.1] [location=75..10250]
GQ199892.1_cds_ACS32033.1_1 [protein=polyprotein] [protein_id=ACS32033.1] [location=75..10250]
GQ199893.1_cds_ACS32034.1_1 [protein=polyprotein] [protein_id=ACS32034.1] [location=74..10249]
GQ199894.1_cds_ACS32035.1_1 [protein=polyprotein] [protein_id=ACS32035.1] [location=64..10239]
GQ199895.1_cds_ACS32023.1_1 [protein=polyprotein] [protein_id=ACS32023.1] [location=74..10249]
GQ199896.1_cds_ACS32024.1_1 [protein=polyprotein] [protein_id=ACS32024.1] [location=75..10250]
GQ199897.1_cds_ACS32025.1_1 [protein=polyprotein] [protein_id=ACS32025.1] [location=63..10238]
GQ199898.1_cds_ACS32026.1_1 [protein=polyprotein] [protein_id=ACS32026.1] [location=74..10249]
GQ252676.1_cds_ACS32038.1_1 [protein=polyprotein] [protein_id=ACS32038.1] [location=65..10240]
GQ252677.1_cds_ACS32039.1_1 [protein=polyprotein] [protein_id=ACS32039.1] [location=64..10239]
FJ432724.1_cds_ACQ44535.1_1 [protein=polyprotein] [protein_id=ACQ44535.1] [location=60..10235]
FJ859028.1_cds_ACQ44315.1_1 [protein=polyprotein] [protein_id=ACQ44315.1] [location=60..10235]
FJ873808.1_cds_ACQ44317.1_1 [protein=polyprotein] [protein_id=ACQ44317.1] [location=74..10249]
FJ873811.1_cds_ACQ44320.1_1 [protein=polyprotein] [protein_id=ACQ44320.1] [location=75..10250]
FJ882593.1_cds_ACQ44536.1_1 [protein=polyprotein] [protein_id=ACQ44536.1] [location=75..10250]
FJ882594.1_cds_ACQ44537.1_1 [protein=polyprotein] [protein_id=ACQ44537.1] [location=74..10249]
FJ882602.1_cds_ACQ44409.1_1 [protein=polyprotein] [protein_id=ACQ44409.1] [location=75..10250]
FJ898432.1_cds_ACQ44471.1_1 [protein=polyprotein] [protein_id=ACQ44471.1] [location=75..10250]
FJ898434.1_cds_ACQ44473.1_1 [protein=polyprotein] [protein_id=ACQ44473.1] [location=75..10250]
FJ898435.1_cds_ACQ44474.1_1 [protein=polyprotein] [protein_id=ACQ44474.1] [location=74..10249]
FJ898436.1_cds_ACQ44475.1_1 [protein=polyprotein] [protein_id=ACQ44475.1] [location=74..10249]
FJ898438.1_cds_ACQ44477.1_1 [protein=polyprotein] [protein_id=ACQ44477.1] [location=60..10235]
FJ898439.1_cds_ACQ44478.1_1 [protein=polyprotein] [protein_id=ACQ44478.1] [location=74..10249]
FJ898449.1_cds_ACQ44488.1_1 [protein=polyprotein] [protein_id=ACQ44488.1] [location=75..10250]
FJ898450.1_cds_ACQ44489.1_1 [protein=polyprotein] [protein_id=ACQ44489.1] [location=75..10250]
FJ898451.1_cds_ACQ44490.1_1 [protein=polyprotein] [protein_id=ACQ44490.1] [location=75..10250]
FJ898452.1_cds_ACQ44491.1_1 [protein=polyprotein] [protein_id=ACQ44491.1] [location=75..10250]
FJ898453.1_cds_ACQ44492.1_1 [protein=polyprotein] [protein_id=ACQ44492.1] [location=75..10250]
FJ898454.1_cds_ACQ44493.1_1 [protein=polyprotein] [protein_id=ACQ44493.1] [location=67..10242]
FJ898460.1_cds_ACQ44499.1_1 [protein=polyprotein] [protein_id=ACQ44499.1] [location=75..10250]
FJ898461.1_cds_ACQ44500.1_1 [protein=polyprotein] [protein_id=ACQ44500.1] [location=74..10249]
FJ898465.1_cds_ACQ44504.1_1 [protein=polyprotein] [protein_id=ACQ44504.1] [location=74..10249]
FJ898466.1_cds_ACQ44505.1_1 [protein=polyprotein] [protein_id=ACQ44505.1] [location=75..10250]
FJ898467.1_cds_ACQ44506.1_1 [protein=polyprotein] [protein_id=ACQ44506.1] [location=75..10250]
FJ898477.1_cds_ACQ44531.1_1 [protein=polyprotein] [protein_id=ACQ44531.1] [location=74..10249]
FJ898478.1_cds_ACQ44532.1_1 [protein=polyprotein] [protein_id=ACQ44532.1] [location=75..10250]
FJ898479.1_cds_ACQ44533.1_1 [protein=polyprotein] [protein_id=ACQ44533.1] [location=75..10250]
FJ906956.1_cds_ACQ44514.1_1 [protein=polyprotein] [protein_id=ACQ44514.1] [location=74..10249]
FJ906957.1_cds_ACQ44515.1_1 [protein=polyprotein] [protein_id=ACQ44515.1] [location=75..10250]
FJ906958.1_cds_ACQ44516.1_1 [protein=polyprotein] [protein_id=ACQ44516.1] [location=75..10250]
FJ906959.1_cds_ACQ44517.1_1 [protein=polyprotein] [protein_id=ACQ44517.1] [location=75..10250]
FJ906960.1_cds_ACQ44518.1_1 [protein=polyprotein] [protein_id=ACQ44518.1] [location=57..10232]
FJ906961.1_cds_ACQ44519.1_1 [protein=polyprotein] [protein_id=ACQ44519.1] [location=74..10249]
FJ906962.1_cds_ACQ44520.1_1 [protein=polyprotein] [protein_id=ACQ44520.1] [location=74..10249]
FJ906966.1_cds_ACQ44524.1_1 [protein=polyprotein] [protein_id=ACQ44524.1] [location=75..10250]
FJ906967.1_cds_ACQ44525.1_1 [protein=polyprotein] [protein_id=ACQ44525.1] [location=75..10250]
FJ906968.1_cds_ACQ44526.1_1 [protein=polyprotein] [protein_id=ACQ44526.1] [location=75..10250]
FJ906969.1_cds_ACQ44527.1_1 [protein=polyprotein] [protein_id=ACQ44527.1] [location=75..10250]
FJ810409.1_cds_ACO06132.1_1 [protein=polyprotein] [protein_id=ACO06132.1] [location=75..10250]
FJ810410.1_cds_ACO06133.1_1 [protein=polyprotein] [protein_id=ACO06133.1] [location=75..10250]
FJ810411.1_cds_ACO06134.1_1 [protein=polyprotein] [protein_id=ACO06134.1] [location=75..10250]
FJ810412.1_cds_ACO06135.1_1 [protein=polyprotein] [protein_id=ACO06135.1] [location=75..10250]
FJ810418.1_cds_ACO06141.1_1 [protein=polyprotein] [protein_id=ACO06141.1] [location=75..10250]
FJ850050.1_cds_ACO06186.1_1 [protein=polyprotein] [protein_id=ACO06186.1] [location=64..10239]
FJ850051.1_cds_ACO06187.1_1 [protein=polyprotein] [protein_id=ACO06187.1] [location=74..10249]
FJ850053.1_cds_ACO06189.1_1 [protein=polyprotein] [protein_id=ACO06189.1] [location=74..10249]
FJ850054.1_cds_ACO06190.1_1 [protein=polyprotein] [protein_id=ACO06190.1] [location=74..10249]
FJ850060.1_cds_ACO06191.1_1 [protein=polyprotein] [protein_id=ACO06191.1] [location=74..10249]
FJ850061.1_cds_ACO06192.1_1 [protein=polyprotein] [protein_id=ACO06192.1] [location=57..10232]
FJ850062.1_cds_ACO06193.1_1 [protein=polyprotein] [protein_id=ACO06193.1] [location=74..10249]
FJ850063.1_cds_ACO06194.1_1 [protein=polyprotein] [protein_id=ACO06194.1] [location=75..10250]
FJ850064.1_cds_ACO06195.1_1 [protein=polyprotein] [protein_id=ACO06195.1] [location=74..10249]
FJ850065.1_cds_ACO06196.1_1 [protein=polyprotein] [protein_id=ACO06196.1] [location=74..10249]
FJ850066.1_cds_ACO06197.1_1 [protein=polyprotein] [protein_id=ACO06197.1] [location=74..10249]
FJ850067.1_cds_ACO06198.1_1 [protein=polyprotein] [protein_id=ACO06198.1] [location=74..10249]
FJ850072.1_cds_ACO06152.1_1 [protein=polyprotein] [protein_id=ACO06152.1] [location=75..10250]
FJ850074.1_cds_ACO06154.1_1 [protein=polyprotein] [protein_id=ACO06154.1] [location=75..10250]
FJ850076.1_cds_ACO06156.1_1 [protein=polyprotein] [protein_id=ACO06156.1] [location=61..10236]
FJ850078.1_cds_ACO06158.1_1 [protein=polyprotein] [protein_id=ACO06158.1] [location=65..10240]
FJ850082.1_cds_ACO06162.1_1 [protein=polyprotein] [protein_id=ACO06162.1] [location=75..10250]
FJ850085.1_cds_ACO06165.1_1 [protein=polyprotein] [protein_id=ACO06165.1] [location=75..10250]
FJ850088.1_cds_ACO06168.1_1 [protein=polyprotein] [protein_id=ACO06168.1] [location=65..10240]
FJ850091.1_cds_ACO06171.1_1 [protein=polyprotein] [protein_id=ACO06171.1] [location=75..10250]
FJ850105.1_cds_ACO06209.1_1 [protein=polyprotein] [protein_id=ACO06209.1] [location=75..10250]
FJ850106.1_cds_ACO06210.1_1 [protein=polyprotein] [protein_id=ACO06210.1] [location=75..10250]
FJ850107.1_cds_ACO06211.1_1 [protein=polyprotein] [protein_id=ACO06211.1] [location=64..10239]
FJ850108.1_cds_ACO06212.1_1 [protein=polyprotein] [protein_id=ACO06212.1] [location=60..10235]
FJ850112.1_cds_ACO06216.1_1 [protein=polyprotein] [protein_id=ACO06216.1] [location=97..10272]
FJ850115.1_cds_ACO06177.1_1 [protein=polyprotein] [protein_id=ACO06177.1] [location=74..10249]
FJ850116.1_cds_ACO06178.1_1 [protein=polyprotein] [protein_id=ACO06178.1] [location=75..10250]
FJ850117.1_cds_ACO06179.1_1 [protein=polyprotein] [protein_id=ACO06179.1] [location=74..10249]
FJ850118.1_cds_ACO06180.1_1 [protein=polyprotein] [protein_id=ACO06180.1] [location=74..10249]
FJ850119.1_cds_ACO06181.1_1 [protein=polyprotein] [protein_id=ACO06181.1] [location=74..10249]
FJ850120.1_cds_ACO06182.1_1 [protein=polyprotein] [protein_id=ACO06182.1] [location=74..10249]
FJ850121.1_cds_ACO06183.1_1 [protein=polyprotein] [protein_id=ACO06183.1] [location=74..10249]
FJ744709.1_cds_ACN58738.1_1 [protein=polyprotein] [protein_id=ACN58738.1] [location=75..10250]
FJ687434.1_cds_ACN42681.1_1 [protein=polyprotein] [protein_id=ACN42681.1] [location=75..10250]
FJ687435.1_cds_ACN42682.1_1 [protein=polyprotein] [protein_id=ACN42682.1] [location=75..10250]
FJ687436.1_cds_ACN42683.1_1 [protein=polyprotein] [protein_id=ACN42683.1] [location=75..10250]
FJ687437.1_cds_ACN42684.1_1 [protein=polyprotein] [protein_id=ACN42684.1] [location=75..10250]
FJ687438.1_cds_ACN42685.1_1 [protein=polyprotein] [protein_id=ACN42685.1] [location=75..10250]
FJ687439.1_cds_ACN42686.1_1 [protein=polyprotein] [protein_id=ACN42686.1] [location=75..10250]
FJ687440.1_cds_ACN42687.1_1 [protein=polyprotein] [protein_id=ACN42687.1] [location=75..10250]
FJ687441.1_cds_ACN42688.1_1 [protein=polyprotein] [protein_id=ACN42688.1] [location=75..10250]
FJ687442.1_cds_ACN42689.1_1 [protein=polyprotein] [protein_id=ACN42689.1] [location=75..10250]
FJ687443.1_cds_ACN42690.1_1 [protein=polyprotein] [protein_id=ACN42690.1] [location=75..10250]
FJ687444.1_cds_ACN42691.1_1 [protein=polyprotein] [protein_id=ACN42691.1] [location=75..10250]
FJ687445.1_cds_ACN42692.1_1 [protein=polyprotein] [protein_id=ACN42692.1] [location=75..10250]
FJ687446.1_cds_ACN42693.1_1 [protein=polyprotein] [protein_id=ACN42693.1] [location=75..10250]
FJ687447.1_cds_ACN42694.1_1 [protein=polyprotein] [protein_id=ACN42694.1] [location=75..10250]
FJ744703.1_cds_ACN42699.1_1 [protein=polyprotein] [protein_id=ACN42699.1] [location=75..10250]
FJ744704.1_cds_ACN42736.1_1 [protein=polyprotein] [protein_id=ACN42736.1] [location=60..10235]
FJ744705.1_cds_ACN42737.1_1 [protein=polyprotein] [protein_id=ACN42737.1] [location=64..10239]
FJ744706.1_cds_ACN42738.1_1 [protein=polyprotein] [protein_id=ACN42738.1] [location=75..10250]
FJ744707.1_cds_ACN42739.1_1 [protein=polyprotein] [protein_id=ACN42739.1] [location=75..10250]
FJ744708.1_cds_ACN42740.1_1 [protein=polyprotein] [protein_id=ACN42740.1] [location=75..10250]
FJ744710.1_cds_ACN42700.1_1 [protein=polyprotein] [protein_id=ACN42700.1] [location=75..10250]
FJ744711.1_cds_ACN42701.1_1 [protein=polyprotein] [protein_id=ACN42701.1] [location=75..10250]
FJ744712.1_cds_ACN42702.1_1 [protein=polyprotein] [protein_id=ACN42702.1] [location=75..10250]
FJ744713.1_cds_ACN42703.1_1 [protein=polyprotein] [protein_id=ACN42703.1] [location=75..10250]
FJ744714.1_cds_ACN42704.1_1 [protein=polyprotein] [protein_id=ACN42704.1] [location=75..10250]
FJ744715.1_cds_ACN42705.1_1 [protein=polyprotein] [protein_id=ACN42705.1] [location=75..10250]
FJ744716.1_cds_ACN42706.1_1 [protein=polyprotein] [protein_id=ACN42706.1] [location=75..10250]
FJ744717.1_cds_ACN42707.1_1 [protein=polyprotein] [protein_id=ACN42707.1] [location=75..10250]
FJ744718.1_cds_ACN42708.1_1 [protein=polyprotein] [protein_id=ACN42708.1] [location=75..10250]
FJ744719.1_cds_ACN42709.1_1 [protein=polyprotein] [protein_id=ACN42709.1] [location=116..10291]
FJ744720.1_cds_ACN42710.1_1 [protein=polyprotein] [protein_id=ACN42710.1] [location=75..10250]
FJ744721.1_cds_ACN42711.1_1 [protein=polyprotein] [protein_id=ACN42711.1] [location=75..10250]
FJ744722.1_cds_ACN42712.1_1 [protein=polyprotein] [protein_id=ACN42712.1] [location=75..10250]
FJ744723.1_cds_ACN42713.1_1 [protein=polyprotein] [protein_id=ACN42713.1] [location=75..10250]
FJ744724.1_cds_ACN42714.1_1 [protein=polyprotein] [protein_id=ACN42714.1] [location=75..10250]
FJ744725.1_cds_ACN42715.1_1 [protein=polyprotein] [protein_id=ACN42715.1] [location=75..10250]
FJ744741.1_cds_ACN42731.1_1 [protein=polyprotein] [protein_id=ACN42731.1] [location=74..10249]
FJ744742.1_cds_ACN42732.1_1 [protein=polyprotein] [protein_id=ACN42732.1] [location=75..10250]
FJ744743.1_cds_ACN42733.1_1 [protein=polyprotein] [protein_id=ACN42733.1] [location=91..10266]
FJ744744.1_cds_ACN42734.1_1 [protein=polyprotein] [protein_id=ACN42734.1] [location=59..10234]
FJ744745.1_cds_ACN42735.1_1 [protein=polyprotein] [protein_id=ACN42735.1] [location=74..10249]
FJ432726.1_cds_ACL99128.1_1 [protein=polyprotein] [protein_id=ACL99128.1] [location=75..10250]
FJ461305.1_cds_ACL99152.1_1 [protein=polyprotein] [protein_id=ACL99152.1] [location=62..10237]
FJ461309.1_cds_ACL99156.1_1 [protein=polyprotein] [protein_id=ACL99156.1] [location=75..10250]
FJ461311.1_cds_ACL99158.1_1 [protein=polyprotein] [protein_id=ACL99158.1] [location=75..10250]
FJ461314.1_cds_ACL99161.1_1 [protein=polyprotein] [protein_id=ACL99161.1] [location=75..10250]
FJ461321.1_cds_ACL99167.1_1 [protein=polyprotein] [protein_id=ACL99167.1] [location=75..10250]
FJ547064.1_cds_ACL98981.1_1 [protein=polyprotein] [protein_id=ACL98981.1] [location=75..10250]
FJ547067.1_cds_ACL98984.1_1 [protein=polyprotein] [protein_id=ACL98984.1] [location=75..10250]
FJ547090.1_cds_ACL99018.1_1 [protein=polyprotein] [protein_id=ACL99018.1] [location=75..10250]
FJ562098.1_cds_ACL99005.1_1 [protein=polyprotein] [protein_id=ACL99005.1] [location=63..10238]
FJ639697.1_cds_ACL99215.1_1 [protein=polyprotein] [protein_id=ACL99215.1] [location=65..10240]
FJ639698.1_cds_ACL99216.1_1 [protein=polyprotein] [protein_id=ACL99216.1] [location=75..10250]
FJ639699.1_cds_ACL99217.1_1 [protein=polyprotein] [protein_id=ACL99217.1] [location=75..10250]
FJ639700.1_cds_ACL99218.1_1 [protein=polyprotein] [protein_id=ACL99218.1] [location=75..10250]
FJ639701.1_cds_ACL99219.1_1 [protein=polyprotein] [protein_id=ACL99219.1] [location=75..10250]
FJ639702.1_cds_ACL99220.1_1 [protein=polyprotein] [protein_id=ACL99220.1] [location=64..10239]
FJ639703.1_cds_ACL99221.1_1 [protein=polyprotein] [protein_id=ACL99221.1] [location=60..10235]
FJ639704.1_cds_ACL99222.1_1 [protein=polyprotein] [protein_id=ACL99222.1] [location=70..10245]
FJ639705.1_cds_ACL99223.1_1 [protein=polyprotein] [protein_id=ACL99223.1] [location=75..10250]
FJ639706.1_cds_ACL99224.1_1 [protein=polyprotein] [protein_id=ACL99224.1] [location=75..10250]
FJ639707.1_cds_ACL99225.1_1 [protein=polyprotein] [protein_id=ACL99225.1] [location=75..10250]
FJ639708.1_cds_ACL99226.1_1 [protein=polyprotein] [protein_id=ACL99226.1] [location=75..10250]
FJ639709.1_cds_ACL99227.1_1 [protein=polyprotein] [protein_id=ACL99227.1] [location=76..10251]
FJ639710.1_cds_ACL99228.1_1 [protein=polyprotein] [protein_id=ACL99228.1] [location=64..10239]
FJ639711.1_cds_ACL99229.1_1 [protein=polyprotein] [protein_id=ACL99229.1] [location=64..10239]
FJ639717.1_cds_ACL99235.1_1 [protein=polyprotein] [protein_id=ACL99235.1] [location=75..10250]
FJ639718.1_cds_ACL99236.1_1 [protein=polyprotein] [protein_id=ACL99236.1] [location=100..10275]
FJ639732.1_cds_ACL99019.1_1 [protein=polyprotein] [protein_id=ACL99019.1] [location=65..10240]
FJ639733.1_cds_ACL99020.1_1 [protein=polyprotein] [protein_id=ACL99020.1] [location=75..10250]
FJ639734.1_cds_ACL99021.1_1 [protein=polyprotein] [protein_id=ACL99021.1] [location=63..10238]
FJ639783.1_cds_ACL99070.1_1 [protein=polyprotein] [protein_id=ACL99070.1] [location=75..10250]
FJ639788.1_cds_ACL99075.1_1 [protein=polyprotein] [protein_id=ACL99075.1] [location=75..10250]
FJ639809.1_cds_ACL99096.1_1 [protein=polyprotein] [protein_id=ACL99096.1] [location=75..10250]
FJ639822.1_cds_ACL99109.1_1 [protein=polyprotein] [protein_id=ACL99109.1] [location=75..10250]
FJ639828.1_cds_ACL99115.1_1 [protein=polyprotein] [protein_id=ACL99115.1] [location=75..10250]
FJ639829.1_cds_ACL99116.1_1 [protein=polyprotein] [protein_id=ACL99116.1] [location=75..10250]
FJ639830.1_cds_ACL99117.1_1 [protein=polyprotein] [protein_id=ACL99117.1] [location=75..10250]
FJ639831.1_cds_ACL99118.1_1 [protein=polyprotein] [protein_id=ACL99118.1] [location=75..10250]
FJ639832.1_cds_ACL99119.1_1 [protein=polyprotein] [protein_id=ACL99119.1] [location=75..10250]
FJ639833.1_cds_ACL99120.1_1 [protein=polyprotein] [protein_id=ACL99120.1] [location=75..10250]
FJ639834.1_cds_ACL99121.1_1 [protein=polyprotein] [protein_id=ACL99121.1] [location=60..10235]
FJ639835.1_cds_ACL99122.1_1 [protein=polyprotein] [protein_id=ACL99122.1] [location=75..10250]
FJ639836.1_cds_ACL99123.1_1 [protein=polyprotein] [protein_id=ACL99123.1] [location=75..10250]
FJ639837.1_cds_ACL99124.1_1 [protein=polyprotein] [protein_id=ACL99124.1] [location=75..10250]
FJ478455.1_cds_ACK28186.1_1 [protein=polyprotein] [protein_id=ACK28186.1] [location=75..10250]
FJ478459.1_cds_ACK28190.1_1 [protein=polyprotein] [protein_id=ACK28190.1] [location=75..10250]
FJ226066.1_cds_ACJ04170.1_1 [protein=polyprotein] [protein_id=ACJ04170.1] [location=79..10254]
FJ373299.1_cds_ACJ04175.1_1 [protein=polyprotein] [protein_id=ACJ04175.1] [location=75..10250]
FJ373300.1_cds_ACJ04176.1_1 [protein=polyprotein] [protein_id=ACJ04176.1] [location=75..10250]
FJ373301.1_cds_ACJ04177.1_1 [protein=polyprotein] [protein_id=ACJ04177.1] [location=75..10250]
FJ390384.1_cds_ACJ04196.1_1 [protein=polyprotein] [protein_id=ACJ04196.1] [location=75..10250]
FJ390385.1_cds_ACJ04197.1_1 [protein=polyprotein] [protein_id=ACJ04197.1] [location=75..10250]
FJ390387.1_cds_ACJ04199.1_1 [protein=polyprotein] [protein_id=ACJ04199.1] [location=65..10240]
FJ390389.1_cds_ACJ04201.1_1 [protein=polyprotein] [protein_id=ACJ04201.1] [location=75..10250]
FJ390390.1_cds_ACJ04202.1_1 [protein=polyprotein] [protein_id=ACJ04202.1] [location=74..10249]
FJ390391.1_cds_ACJ04203.1_1 [protein=polyprotein] [protein_id=ACJ04203.1] [location=75..10250]
FJ410193.1_cds_ACJ04235.1_1 [protein=polyprotein] [protein_id=ACJ04235.1] [location=63..10238]
FJ410195.1_cds_ACJ04237.1_1 [protein=polyprotein] [protein_id=ACJ04237.1] [location=75..10250]
FJ410200.1_cds_ACJ04242.1_1 [protein=polyprotein] [protein_id=ACJ04242.1] [location=75..10250]
FJ410202.1_cds_ACJ04244.1_1 [protein=polyprotein] [protein_id=ACJ04244.1] [location=65..10240]
FJ410208.1_cds_ACJ04250.1_1 [protein=polyprotein] [protein_id=ACJ04250.1] [location=72..10247]
FJ410215.1_cds_ACJ04257.1_1 [protein=polyprotein] [protein_id=ACJ04257.1] [location=75..10250]
FJ410217.1_cds_ACJ04259.1_1 [protein=polyprotein] [protein_id=ACJ04259.1] [location=75..10250]
FJ410219.1_cds_ACJ04261.1_1 [protein=polyprotein] [protein_id=ACJ04261.1] [location=65..10240]
FJ410221.1_cds_ACJ04263.1_1 [protein=polyprotein] [protein_id=ACJ04263.1] [location=75..10250]
FJ410223.1_cds_ACJ04265.1_1 [protein=polyprotein] [protein_id=ACJ04265.1] [location=75..10250]
FJ410224.1_cds_ACJ04266.1_1 [protein=polyprotein] [protein_id=ACJ04266.1] [location=75..10250]
FJ410228.1_cds_ACJ04270.1_1 [protein=polyprotein] [protein_id=ACJ04270.1] [location=75..10250]
FJ410233.1_cds_ACJ04275.1_1 [protein=polyprotein] [protein_id=ACJ04275.1] [location=60..10235]
FJ410237.1_cds_ACJ04279.1_1 [protein=polyprotein] [protein_id=ACJ04279.1] [location=75..10250]
FJ410241.1_cds_ACJ04283.1_1 [protein=polyprotein] [protein_id=ACJ04283.1] [location=75..10250]
FJ410259.1_cds_ACJ04301.1_1 [protein=polyprotein] [protein_id=ACJ04301.1] [location=75..10250]
FJ410288.1_cds_ACJ04330.1_1 [protein=polyprotein] [protein_id=ACJ04330.1] [location=75..10250]
FJ410291.1_cds_ACJ04333.1_1 [protein=polyprotein] [protein_id=ACJ04333.1] [location=74..10249]
FJ205877.1_cds_ACI15877.1_1 [protein=polyprotein] [protein_id=ACI15877.1] [location=75..10250]
FJ205878.1_cds_ACI15878.1_1 [protein=polyprotein] [protein_id=ACI15878.1] [location=75..10250]
FJ205879.1_cds_ACI15879.1_1 [protein=polyprotein] [protein_id=ACI15879.1] [location=75..10250]
FJ205880.1_cds_ACI15880.1_1 [protein=polyprotein] [protein_id=ACI15880.1] [location=75..10250]
FJ182012.1_cds_ACH99659.1_1 [protein=polyprotein] [protein_id=ACH99659.1] [location=75..10241]
FJ182014.1_cds_ACH99661.1_1 [protein=polyprotein] [protein_id=ACH99661.1] [location=75..10250]
FJ205885.1_cds_ACH99682.1_1 [protein=polyprotein] [protein_id=ACH99682.1] [location=75..10250]
FM210204.1_cds_CAR65135.1_1 [db_xref=GOA:B5U7V9,InterPro:IPR000069,InterPro:IPR000208,InterPro:
FM210205.1_cds_CAR65136.1_1 [db_xref=GOA:B5U800,InterPro:IPR000069,InterPro:IPR000208,InterPro:
FM210206.1_cds_CAR65137.1_1 [db_xref=GOA:B5U7W1,InterPro:IPR000069,InterPro:IPR000208,InterPro:
FM210207.1_cds_CAR65138.1_1 [db_xref=GOA:B5U7W2,InterPro:IPR000069,InterPro:IPR000208,InterPro:
FM210212.1_cds_CAR65143.1_1 [db_xref=GOA:B1PPD0,InterPro:IPR000069,InterPro:IPR000208,InterPro:
FM210213.1_cds_CAR65144.1_1 [db_xref=GOA:B5U7W8,InterPro:IPR000069,InterPro:IPR000208,InterPro:
FM210215.1_cds_CAR65146.1_1 [db_xref=GOA:B5U7X0,InterPro:IPR000069,InterPro:IPR000208,InterPro:
FM210216.1_cds_CAR65147.1_1 [db_xref=GOA:B5U7X1,InterPro:IPR000069,InterPro:IPR000208,InterPro:
FM210217.1_cds_CAR65148.1_1 [db_xref=GOA:B5U7X2,InterPro:IPR000069,InterPro:IPR000208,InterPro:
FM210224.1_cds_CAR65155.1_1 [db_xref=GOA:B5U7X9,InterPro:IPR000069,InterPro:IPR000208,InterPro:
FM210225.1_cds_CAR65156.1_1 [db_xref=GOA:B5U7Y0,InterPro:IPR000069,InterPro:IPR000208,InterPro:
FM210226.1_cds_CAR65157.1_1 [db_xref=GOA:B5U7Y1,InterPro:IPR000069,InterPro:IPR000208,InterPro:
FM210227.1_cds_CAR65158.1_1 [db_xref=GOA:B5U7Y2,InterPro:IPR000069,InterPro:IPR000208,InterPro:
FM210228.1_cds_CAR65159.1_1 [db_xref=GOA:B5U7Y1,InterPro:IPR000069,InterPro:IPR000208,InterPro:
FM210229.1_cds_CAR65160.1_1 [db_xref=GOA:B1PPD0,InterPro:IPR000069,InterPro:IPR000208,InterPro:
FM210230.1_cds_CAR65161.1_1 [db_xref=GOA:B5U7Y5,InterPro:IPR000069,InterPro:IPR000208,InterPro:
FM210231.1_cds_CAR66106.1_1 [db_xref=GOA:B5U7Y6,InterPro:IPR000069,InterPro:IPR000208,InterPro:
FM210232.2_cds_CAR65163.2_1 [db_xref=GOA:B5U7Y7,InterPro:IPR000069,InterPro:IPR000208,InterPro:
FM210233.2_cds_CAR65164.2_1 [db_xref=GOA:B5U7Y8,InterPro:IPR000069,InterPro:IPR000208,InterPro:
FM210234.2_cds_CAR65166.2_1 [db_xref=GOA:B5U7Y9,InterPro:IPR000069,InterPro:IPR000208,InterPro:
FM210235.2_cds_CAR65167.2_1 [db_xref=GOA:B5U7Z0,InterPro:IPR000069,InterPro:IPR000208,InterPro:
FM210238.2_cds_CAR65170.2_1 [db_xref=GOA:B5U7Z3,InterPro:IPR000069,InterPro:IPR000208,InterPro:
FM210239.2_cds_CAR65171.2_1 [db_xref=GOA:B5U7Z4,InterPro:IPR000069,InterPro:IPR000208,InterPro:
FM210241.2_cds_CAR65173.2_1 [db_xref=GOA:B5U7Z6,InterPro:IPR000069,InterPro:IPR000208,InterPro:
FM210242.2_cds_CAR65174.2_1 [db_xref=GOA:B5U7Z7,InterPro:IPR000069,InterPro:IPR000208,InterPro:
FM210243.2_cds_CAR65175.2_1 [db_xref=GOA:B5U7Z8,InterPro:IPR000069,InterPro:IPR000208,InterPro:
FM210244.2_cds_CAR65176.2_1 [db_xref=GOA:B5U7Z9,InterPro:IPR000069,InterPro:IPR000208,InterPro:
FM210245.2_cds_CAR65177.2_1 [db_xref=GOA:B5U800,InterPro:IPR000069,InterPro:IPR000208,InterPro:
FM210246.2_cds_CAR65178.2_1 [db_xref=GOA:B5U801,InterPro:IPR000069,InterPro:IPR000208,InterPro:
EU854293.1_cds_ACH61685.1_1 [protein=polyprotein] [protein_id=ACH61685.1] [location=62..10237]
EU854294.1_cds_ACH61686.1_1 [protein=polyprotein] [protein_id=ACH61686.1] [location=64..10239]
FJ024452.1_cds_ACH61762.1_1 [protein=polyprotein] [protein_id=ACH61762.1] [location=75..10250]
FJ024454.1_cds_ACH61764.1_1 [protein=polyprotein] [protein_id=ACH61764.1] [location=75..10250]
FJ024458.1_cds_ACH61768.1_1 [protein=polyprotein] [protein_id=ACH61768.1] [location=75..10250]
FJ024461.1_cds_ACH61771.1_1 [protein=polyprotein] [protein_id=ACH61771.1] [location=75..10250]
FJ024473.1_cds_ACH61722.1_1 [protein=polyprotein] [protein_id=ACH61722.1] [location=75..10250]
FJ024474.1_cds_ACH61723.1_1 [protein=polyprotein] [protein_id=ACH61723.1] [location=75..10250]
FJ024475.1_cds_ACH61724.1_1 [protein=polyprotein] [protein_id=ACH61724.1] [location=75..10250]
FJ024477.1_cds_ACH61726.1_1 [protein=polyprotein] [protein_id=ACH61726.1] [location=75..10250]
EU056810.1_cds_ABW74619.1_1 [protein=polyprotein] [protein_id=ABW74619.1] [location=97..10272]
EU056811.1_cds_ABW74620.1_1 [protein=polyprotein] [protein_id=ABW74620.1] [location=96..10271]
EU056812.1_cds_ABW74621.1_1 [protein=polyprotein] [protein_id=ABW74621.1] [location=97..10272]
EU726767.1_cds_ACE63527.1_1 [protein=polyprotein] [protein_id=ACE63527.1] [location=75..10250]
EU726770.1_cds_ACE63530.1_1 [protein=polyprotein] [protein_id=ACE63530.1] [location=75..10250]
EU726775.1_cds_ACE63535.1_1 [protein=polyprotein] [protein_id=ACE63535.1] [location=75..10250]
EU726776.1_cds_ACE63536.1_1 [protein=polyprotein] [protein_id=ACE63536.1] [location=60..10235]
EU781135.1_cds_ACE63543.1_1 [protein=polyprotein] [protein_id=ACE63543.1] [location=75..10250]
EU660398.1_cds_ACD13309.1_1 [protein=polyprotein] [protein_id=ACD13309.1] [location=75..10250]
EU660399.1_cds_ACD13310.1_1 [protein=polyprotein] [protein_id=ACD13310.1] [location=75..10250]
EU660400.1_cds_ACD13311.1_1 [protein=polyprotein] [protein_id=ACD13311.1] [location=75..10250]
EU660404.1_cds_ACD13315.1_1 [protein=polyprotein] [protein_id=ACD13315.1] [location=75..10250]
EU660405.1_cds_ACD13316.1_1 [protein=polyprotein] [protein_id=ACD13316.1] [location=76..10251]
EU660406.1_cds_ACD13317.1_1 [protein=polyprotein] [protein_id=ACD13317.1] [location=75..10250]
EU660413.1_cds_ACD13324.1_1 [protein=polyprotein] [protein_id=ACD13324.1] [location=75..10250]
EU660414.1_cds_ACD13325.1_1 [protein=polyprotein] [protein_id=ACD13325.1] [location=75..10250]
EU660415.1_cds_ACD13326.1_1 [protein=polyprotein] [protein_id=ACD13326.1] [location=75..10250]
EU660416.1_cds_ACD13327.1_1 [protein=polyprotein] [protein_id=ACD13327.1] [location=75..10250]
EU660417.1_cds_ACD13328.1_1 [protein=polyprotein] [protein_id=ACD13328.1] [location=75..10250]
EU677137.1_cds_ACD13344.1_1 [protein=polyprotein] [protein_id=ACD13344.1] [location=58..10233]
EU677138.1_cds_ACD13345.1_1 [protein=polyprotein] [protein_id=ACD13345.1] [location=75..10250]
EU677141.1_cds_ACD13348.1_1 [protein=polyprotein] [protein_id=ACD13348.1] [location=75..10250]
EU677142.1_cds_ACD13349.1_1 [protein=polyprotein] [protein_id=ACD13349.1] [location=75..10250]
EU677143.1_cds_ACD13350.1_1 [protein=polyprotein] [protein_id=ACD13350.1] [location=75..10250]
EU677144.1_cds_ACD13351.1_1 [protein=polyprotein] [protein_id=ACD13351.1] [location=75..10250]
EU677145.1_cds_ACD13352.1_1 [protein=polyprotein] [protein_id=ACD13352.1] [location=75..10250]
EU677146.1_cds_ACD13353.1_1 [protein=polyprotein] [protein_id=ACD13353.1] [location=75..10250]
EU677147.1_cds_ACD13354.1_1 [protein=polyprotein] [protein_id=ACD13354.1] [location=75..10250]
EU677148.1_cds_ACD13355.1_1 [protein=polyprotein] [protein_id=ACD13355.1] [location=75..10250]
EU677149.1_cds_ACD13356.1_1 [protein=polyprotein] [protein_id=ACD13356.1] [location=58..10233]
EU687199.1_cds_ACD13395.1_1 [protein=polyprotein] [protein_id=ACD13395.1] [location=75..10250]
EU687212.1_cds_ACD13396.1_1 [protein=polyprotein] [protein_id=ACD13396.1] [location=65..10240]
EU687213.1_cds_ACD13397.1_1 [protein=polyprotein] [protein_id=ACD13397.1] [location=75..10250]
EU687214.1_cds_ACD13398.1_1 [protein=polyprotein] [protein_id=ACD13398.1] [location=75..10250]
EU687215.1_cds_ACD13399.1_1 [protein=polyprotein] [protein_id=ACD13399.1] [location=75..10250]
EU687216.1_cds_ACD13400.1_1 [protein=polyprotein] [protein_id=ACD13400.1] [location=75..10250]
EU687217.1_cds_ACD13401.1_1 [protein=polyprotein] [protein_id=ACD13401.1] [location=75..10250]
EU687220.1_cds_ACD13404.1_1 [protein=polyprotein] [protein_id=ACD13404.1] [location=75..10250]
EU687222.1_cds_ACD13406.1_1 [protein=polyprotein] [protein_id=ACD13406.1] [location=75..10250]
EU687223.1_cds_ACD13407.1_1 [protein=polyprotein] [protein_id=ACD13407.1] [location=75..10250]
EU687224.1_cds_ACD13408.1_1 [protein=polyprotein] [protein_id=ACD13408.1] [location=75..10250]
EU687225.1_cds_ACD13409.1_1 [protein=polyprotein] [protein_id=ACD13409.1] [location=75..10250]
EU687227.1_cds_ACD13411.1_1 [protein=polyprotein] [protein_id=ACD13411.1] [location=75..10250]
EU687228.1_cds_ACD13412.1_1 [protein=polyprotein] [protein_id=ACD13412.1] [location=75..10250]
EU687229.1_cds_ACD13413.1_1 [protein=polyprotein] [protein_id=ACD13413.1] [location=75..10250]
EU687230.1_cds_ACD13414.1_1 [protein=polyprotein] [protein_id=ACD13414.1] [location=71..10246]
EU687231.1_cds_ACD13415.1_1 [protein=polyprotein] [protein_id=ACD13415.1] [location=75..10250]
EU687232.1_cds_ACD13416.1_1 [protein=polyprotein] [protein_id=ACD13416.1] [location=59..10234]
EU687235.1_cds_ACD13419.1_1 [protein=polyprotein] [protein_id=ACD13419.1] [location=75..10250]
EU687236.1_cds_ACD13420.1_1 [protein=polyprotein] [protein_id=ACD13420.1] [location=75..10250]
EU687237.1_cds_ACD13421.1_1 [protein=polyprotein] [protein_id=ACD13421.1] [location=75..10250]
EU687238.1_cds_ACD13422.1_1 [protein=polyprotein] [protein_id=ACD13422.1] [location=75..10250]
EU687240.1_cds_ACD13424.1_1 [protein=polyprotein] [protein_id=ACD13424.1] [location=75..10250]
EU687241.1_cds_ACD13425.1_1 [protein=polyprotein] [protein_id=ACD13425.1] [location=75..10250]
EU687242.1_cds_ACD13426.1_1 [protein=polyprotein] [protein_id=ACD13426.1] [location=75..10250]
EU687243.1_cds_ACD13427.1_1 [protein=polyprotein] [protein_id=ACD13427.1] [location=75..10250]
EU687244.1_cds_ACD13428.1_1 [protein=polyprotein] [protein_id=ACD13428.1] [location=75..10250]
EU687245.1_cds_ACD13429.1_1 [protein=polyprotein] [protein_id=ACD13429.1] [location=75..10250]
EU687246.1_cds_ACD13430.1_1 [protein=polyprotein] [protein_id=ACD13430.1] [location=75..10250]
EU687248.1_cds_ACD13432.1_1 [protein=polyprotein] [protein_id=ACD13432.1] [location=75..10250]
EU687249.1_cds_ACD13433.1_1 [protein=polyprotein] [protein_id=ACD13433.1] [location=75..10250]
EU687250.1_cds_ACD13434.1_1 [protein=polyprotein] [protein_id=ACD13434.1] [location=65..10240]
EU596483.1_cds_ACB87124.1_1 [protein=polyprotein] [protein_id=ACB87124.1] [location=75..10250]
EU596484.1_cds_ACB87125.1_1 [protein=polyprotein] [protein_id=ACB87125.1] [location=74..10249]
EU596485.1_cds_ACB87126.1_1 [protein=polyprotein] [protein_id=ACB87126.1] [location=75..10250]
EU596486.1_cds_ACB87127.1_1 [protein=polyprotein] [protein_id=ACB87127.1] [location=75..10250]
EU596487.1_cds_ACB87128.1_1 [protein=polyprotein] [protein_id=ACB87128.1] [location=63..10238]
EU596488.1_cds_ACB87129.1_1 [protein=polyprotein] [protein_id=ACB87129.1] [location=75..10250]
EU596489.1_cds_ACB87130.1_1 [protein=polyprotein] [protein_id=ACB87130.1] [location=75..10250]
EU596490.1_cds_ACB87131.1_1 [protein=polyprotein] [protein_id=ACB87131.1] [location=75..10250]
EU596491.1_cds_ACB87132.1_1 [protein=polyprotein] [protein_id=ACB87132.1] [location=75..10250]
EU596495.1_cds_ACB87136.1_1 [protein=polyprotein] [protein_id=ACB87136.1] [location=75..10250]
EU596496.1_cds_ACB87137.1_1 [protein=polyprotein] [protein_id=ACB87137.1] [location=76..10251]
EU596497.1_cds_ACB87138.1_1 [protein=polyprotein] [protein_id=ACB87138.1] [location=75..10250]
EU596498.1_cds_ACB87139.1_1 [protein=polyprotein] [protein_id=ACB87139.1] [location=75..10250]
EU596499.1_cds_ACB87140.1_1 [protein=polyprotein] [protein_id=ACB87140.1] [location=58..10233]
EU596500.1_cds_ACB87141.1_1 [protein=polyprotein] [protein_id=ACB87141.1] [location=75..10250]
EU621672.1_cds_ACB87146.1_1 [protein=polyprotein] [protein_id=ACB87146.1] [location=75..10250]
EU569692.1_cds_ACB29500.1_1 [protein=polyprotein] [protein_id=ACB29500.1] [location=70..10245]
EU569693.1_cds_ACB29501.1_1 [protein=polyprotein] [protein_id=ACB29501.1] [location=75..10250]
EU569694.1_cds_ACB29502.1_1 [protein=polyprotein] [protein_id=ACB29502.1] [location=75..10250]
EU569695.1_cds_ACB29503.1_1 [protein=polyprotein] [protein_id=ACB29503.1] [location=75..10250]
EU569696.1_cds_ACB29504.1_1 [protein=polyprotein] [protein_id=ACB29504.1] [location=60..10235]
EU569697.1_cds_ACB29505.1_1 [protein=polyprotein] [protein_id=ACB29505.1] [location=75..10250]
EU569698.1_cds_ACB29506.1_1 [protein=polyprotein] [protein_id=ACB29506.1] [location=75..10250]
EU569699.1_cds_ACB29507.1_1 [protein=polyprotein] [protein_id=ACB29507.1] [location=74..10249]
EU569700.1_cds_ACB29508.1_1 [protein=polyprotein] [protein_id=ACB29508.1] [location=75..10250]
EU569701.1_cds_ACB29509.1_1 [protein=polyprotein] [protein_id=ACB29509.1] [location=75..10250]
EU569702.1_cds_ACB29510.1_1 [protein=polyprotein] [protein_id=ACB29510.1] [location=75..10250]
EU569703.1_cds_ACB29511.1_1 [protein=polyprotein] [protein_id=ACB29511.1] [location=61..10236]
EU569704.1_cds_ACB29512.1_1 [protein=polyprotein] [protein_id=ACB29512.1] [location=65..10240]
EU569705.1_cds_ACB29513.1_1 [protein=polyprotein] [protein_id=ACB29513.1] [location=60..10235]
EU569706.1_cds_ACB29514.1_1 [protein=polyprotein] [protein_id=ACB29514.1] [location=75..10250]
EU569707.1_cds_ACB29515.1_1 [protein=polyprotein] [protein_id=ACB29515.1] [location=75..10250]
EU569708.1_cds_ACB29516.1_1 [protein=polyprotein] [protein_id=ACB29516.1] [location=75..10250]
EU569709.1_cds_ACB29517.1_1 [protein=polyprotein] [protein_id=ACB29517.1] [location=75..10250]
EU569710.1_cds_ACB29518.1_1 [protein=polyprotein] [protein_id=ACB29518.1] [location=75..10250]
EU569711.1_cds_ACB29519.1_1 [protein=polyprotein] [protein_id=ACB29519.1] [location=75..10250]
EU569712.1_cds_ACB29520.1_1 [protein=polyprotein] [protein_id=ACB29520.1] [location=75..10250]
EU569713.1_cds_ACB29521.1_1 [protein=polyprotein] [protein_id=ACB29521.1] [location=75..10250]
EU569714.1_cds_ACB29522.1_1 [protein=polyprotein] [protein_id=ACB29522.1] [location=75..10250]
EU569715.1_cds_ACB29523.1_1 [protein=polyprotein] [protein_id=ACB29523.1] [location=75..10250]
EU569716.1_cds_ACB29524.1_1 [protein=polyprotein] [protein_id=ACB29524.1] [location=75..10250]
EU569717.1_cds_ACB29525.1_1 [protein=polyprotein] [protein_id=ACB29525.1] [location=75..10250]
EU569718.1_cds_ACB29526.1_1 [protein=polyprotein] [protein_id=ACB29526.1] [location=60..10235]
EU569719.1_cds_ACB29527.1_1 [protein=polyprotein] [protein_id=ACB29527.1] [location=75..10250]
EU569720.1_cds_ACB29528.1_1 [protein=polyprotein] [protein_id=ACB29528.1] [location=75..10250]
EU569721.1_cds_ACB29529.1_1 [protein=polyprotein] [protein_id=ACB29529.1] [location=75..10250]
EU529693.1_cds_ACA58330.1_1 [protein=polyprotein] [protein_id=ACA58330.1] [location=75..10250]
EU529694.1_cds_ACA58331.1_1 [protein=polyprotein] [protein_id=ACA58331.1] [location=75..10250]
EU529695.1_cds_ACA58332.1_1 [protein=polyprotein] [protein_id=ACA58332.1] [location=63..10238]
EU529700.1_cds_ACA58337.1_1 [protein=polyprotein] [protein_id=ACA58337.1] [location=75..10250]
EU529701.1_cds_ACA58338.1_1 [protein=polyprotein] [protein_id=ACA58338.1] [location=75..10250]
EU529706.1_cds_ACA58343.1_1 [protein=polyprotein] [protein_id=ACA58343.1] [location=65..10240]
EU482444.1_cds_ACA48711.1_1 [protein=polyprotein] [protein_id=ACA48711.1] [location=74..10249]
EU482445.1_cds_ACA48712.1_1 [protein=polyprotein] [protein_id=ACA48712.1] [location=66..10241]
EU482446.1_cds_ACA48713.1_1 [protein=polyprotein] [protein_id=ACA48713.1] [location=75..10250]
EU482447.1_cds_ACA48714.1_1 [protein=polyprotein] [protein_id=ACA48714.1] [location=75..10250]
EU482448.1_cds_ACA48715.1_1 [protein=polyprotein] [protein_id=ACA48715.1] [location=75..10250]
EU482449.1_cds_ACA48716.1_1 [protein=polyprotein] [protein_id=ACA48716.1] [location=75..10250]
EU482450.1_cds_ACA48717.1_1 [protein=polyprotein] [protein_id=ACA48717.1] [location=75..10250]
EU482451.1_cds_ACA48718.1_1 [protein=polyprotein] [protein_id=ACA48718.1] [location=75..10250]
EU482463.1_cds_ACA48730.1_1 [protein=polyprotein] [protein_id=ACA48730.1] [location=75..10250]
EU482464.1_cds_ACA48731.1_1 [protein=polyprotein] [protein_id=ACA48731.1] [location=75..10250]
EU482465.1_cds_ACA48732.1_1 [protein=polyprotein] [protein_id=ACA48732.1] [location=75..10250]
EU482466.1_cds_ACA48733.1_1 [protein=polyprotein] [protein_id=ACA48733.1] [location=75..10250]
EU482467.1_cds_ACA48734.1_1 [protein=polyprotein] [protein_id=ACA48734.1] [location=75..10250]
EU482468.1_cds_ACA48735.1_1 [protein=polyprotein] [protein_id=ACA48735.1] [location=75..10250]
EU482469.1_cds_ACA48736.1_1 [protein=polyprotein] [protein_id=ACA48736.1] [location=65..10240]
EU482470.1_cds_ACA48737.1_1 [protein=polyprotein] [protein_id=ACA48737.1] [location=75..10250]
EU482471.1_cds_ACA48738.1_1 [protein=polyprotein] [protein_id=ACA48738.1] [location=75..10250]
EU482472.1_cds_ACA48739.1_1 [protein=polyprotein] [protein_id=ACA48739.1] [location=75..10250]
EU482473.1_cds_ACA48740.1_1 [protein=polyprotein] [protein_id=ACA48740.1] [location=75..10250]
EU482474.1_cds_ACA48741.1_1 [protein=polyprotein] [protein_id=ACA48741.1] [location=75..10250]
EU482475.1_cds_ACA48742.1_1 [protein=polyprotein] [protein_id=ACA48742.1] [location=75..10250]
EU482541.1_cds_ACA48808.1_1 [protein=polyprotein] [protein_id=ACA48808.1] [location=75..10250]
EU482542.1_cds_ACA48809.1_1 [protein=polyprotein] [protein_id=ACA48809.1] [location=75..10250]
EU482543.1_cds_ACA48810.1_1 [protein=polyprotein] [protein_id=ACA48810.1] [location=65..10240]
EU482544.1_cds_ACA48811.1_1 [protein=polyprotein] [protein_id=ACA48811.1] [location=75..10250]
EU482545.1_cds_ACA48812.1_1 [protein=polyprotein] [protein_id=ACA48812.1] [location=75..10250]
EU482546.1_cds_ACA48813.1_1 [protein=polyprotein] [protein_id=ACA48813.1] [location=75..10250]
EU482547.1_cds_ACA48814.1_1 [protein=polyprotein] [protein_id=ACA48814.1] [location=75..10250]
EU482548.1_cds_ACA48815.1_1 [protein=polyprotein] [protein_id=ACA48815.1] [location=59..10234]
EU482549.1_cds_ACA48816.1_1 [protein=polyprotein] [protein_id=ACA48816.1] [location=76..10251]
EU482550.1_cds_ACA48817.1_1 [protein=polyprotein] [protein_id=ACA48817.1] [location=75..10250]
EU482551.1_cds_ACA48818.1_1 [protein=polyprotein] [protein_id=ACA48818.1] [location=75..10250]
EU482552.1_cds_ACA48819.1_1 [protein=polyprotein] [protein_id=ACA48819.1] [location=75..10250]
EU482553.1_cds_ACA48820.1_1 [protein=polyprotein] [protein_id=ACA48820.1] [location=75..10250]
EU482554.1_cds_ACA48821.1_1 [protein=polyprotein] [protein_id=ACA48821.1] [location=75..10250]
EU482556.1_cds_ACA48823.1_1 [protein=polyprotein] [protein_id=ACA48823.1] [location=75..10250]
EU482557.1_cds_ACA48824.1_1 [protein=polyprotein] [protein_id=ACA48824.1] [location=75..10250]
EU482560.1_cds_ACA48827.1_1 [protein=polyprotein] [protein_id=ACA48827.1] [location=75..10250]
EU482561.1_cds_ACA48828.1_1 [protein=polyprotein] [protein_id=ACA48828.1] [location=75..10250]
EU482562.1_cds_ACA48829.1_1 [protein=polyprotein] [protein_id=ACA48829.1] [location=75..10250]
EU482565.1_cds_ACA48832.1_1 [protein=polyprotein] [protein_id=ACA48832.1] [location=75..10250]
EU482568.1_cds_ACA48835.1_1 [protein=polyprotein] [protein_id=ACA48835.1] [location=75..10250]
EU482569.1_cds_ACA48836.1_1 [protein=polyprotein] [protein_id=ACA48836.1] [location=75..10250]
EU482570.1_cds_ACA48837.1_1 [protein=polyprotein] [protein_id=ACA48837.1] [location=75..10250]
EU482571.1_cds_ACA48838.1_1 [protein=polyprotein] [protein_id=ACA48838.1] [location=75..10250]
EU482572.1_cds_ACA48839.1_1 [protein=polyprotein] [protein_id=ACA48839.1] [location=75..10250]
EU482573.1_cds_ACA48840.1_1 [protein=polyprotein] [protein_id=ACA48840.1] [location=57..10232]
EU482574.1_cds_ACA48841.1_1 [protein=polyprotein] [protein_id=ACA48841.1] [location=75..10250]
EU482575.1_cds_ACA48842.1_1 [protein=polyprotein] [protein_id=ACA48842.1] [location=64..10239]
EU482576.1_cds_ACA48843.1_1 [protein=polyprotein] [protein_id=ACA48843.1] [location=75..10250]
EU482577.1_cds_ACA48844.1_1 [protein=polyprotein] [protein_id=ACA48844.1] [location=75..10250]
EU482578.1_cds_ACA48845.1_1 [protein=polyprotein] [protein_id=ACA48845.1] [location=75..10250]
EU482579.1_cds_ACA48846.1_1 [protein=polyprotein] [protein_id=ACA48846.1] [location=75..10250]
EU482580.1_cds_ACA48847.1_1 [protein=polyprotein] [protein_id=ACA48847.1] [location=75..10250]
EU482581.1_cds_ACA48848.1_1 [protein=polyprotein] [protein_id=ACA48848.1] [location=75..10250]
EU482582.1_cds_ACA48849.1_1 [protein=polyprotein] [protein_id=ACA48849.1] [location=75..10250]
EU482583.1_cds_ACA48850.1_1 [protein=polyprotein] [protein_id=ACA48850.1] [location=75..10250]
EU482584.1_cds_ACA48851.1_1 [protein=polyprotein] [protein_id=ACA48851.1] [location=59..10234]
EU482585.1_cds_ACA48852.1_1 [protein=polyprotein] [protein_id=ACA48852.1] [location=75..10250]
EU482586.1_cds_ACA48853.1_1 [protein=polyprotein] [protein_id=ACA48853.1] [location=75..10250]
EU482587.1_cds_ACA48854.1_1 [protein=polyprotein] [protein_id=ACA48854.1] [location=75..10250]
EU482588.1_cds_ACA48855.1_1 [protein=polyprotein] [protein_id=ACA48855.1] [location=75..10250]
EU482589.1_cds_ACA48856.1_1 [protein=polyprotein] [protein_id=ACA48856.1] [location=75..10250]
EU482590.1_cds_ACA48857.1_1 [protein=polyprotein] [protein_id=ACA48857.1] [location=75..10250]
EU482593.1_cds_ACA48860.1_1 [protein=polyprotein] [protein_id=ACA48860.1] [location=75..10250]
EU482594.1_cds_ACA48861.1_1 [protein=polyprotein] [protein_id=ACA48861.1] [location=75..10250]
EU482597.1_cds_ACA48864.1_1 [protein=polyprotein] [protein_id=ACA48864.1] [location=74..10249]
EU482598.1_cds_ACA48865.1_1 [protein=polyprotein] [protein_id=ACA48865.1] [location=74..10249]
EU482599.1_cds_ACA48866.1_1 [protein=polyprotein] [protein_id=ACA48866.1] [location=74..10249]
EU482600.1_cds_ACA48867.1_1 [protein=polyprotein] [protein_id=ACA48867.1] [location=74..10249]
EU482601.1_cds_ACA48868.1_1 [protein=polyprotein] [protein_id=ACA48868.1] [location=75..10250]
EU482602.1_cds_ACA48869.1_1 [protein=polyprotein] [protein_id=ACA48869.1] [location=74..10249]
EU482603.1_cds_ACA48870.1_1 [protein=polyprotein] [protein_id=ACA48870.1] [location=75..10250]
EU482604.1_cds_ACA48871.1_1 [protein=polyprotein] [protein_id=ACA48871.1] [location=75..10250]
EU482605.1_cds_ACA48872.1_1 [protein=polyprotein] [protein_id=ACA48872.1] [location=75..10250]
EU482606.1_cds_ACA48873.1_1 [protein=polyprotein] [protein_id=ACA48873.1] [location=65..10240]
EU482607.1_cds_ACA48874.1_1 [protein=polyprotein] [protein_id=ACA48874.1] [location=75..10250]
EU482608.1_cds_ACA48875.1_1 [protein=polyprotein] [protein_id=ACA48875.1] [location=60..10235]
EU482620.1_cds_ACA48887.1_1 [protein=polyprotein] [protein_id=ACA48887.1] [location=75..10250]
EU482621.1_cds_ACA48888.1_1 [protein=polyprotein] [protein_id=ACA48888.1] [location=75..10250]
EU482622.1_cds_ACA48889.1_1 [protein=polyprotein] [protein_id=ACA48889.1] [location=75..10250]
EU482623.1_cds_ACA48890.1_1 [protein=polyprotein] [protein_id=ACA48890.1] [location=75..10250]
EU482624.1_cds_ACA48891.1_1 [protein=polyprotein] [protein_id=ACA48891.1] [location=75..10250]
EU482625.1_cds_ACA48892.1_1 [protein=polyprotein] [protein_id=ACA48892.1] [location=75..10250]
EU482626.1_cds_ACA48893.1_1 [protein=polyprotein] [protein_id=ACA48893.1] [location=75..10250]
EU482627.1_cds_ACA48894.1_1 [protein=polyprotein] [protein_id=ACA48894.1] [location=75..10250]
EU482628.1_cds_ACA48895.1_1 [protein=polyprotein] [protein_id=ACA48895.1] [location=75..10250]
EU482629.1_cds_ACA48896.1_1 [protein=polyprotein] [protein_id=ACA48896.1] [location=74..10249]
EU482630.1_cds_ACA48897.1_1 [protein=polyprotein] [protein_id=ACA48897.1] [location=75..10250]
EU482631.1_cds_ACA48898.1_1 [protein=polyprotein] [protein_id=ACA48898.1] [location=74..10249]
EU482632.1_cds_ACA48899.1_1 [protein=polyprotein] [protein_id=ACA48899.1] [location=74..10249]
EU482633.1_cds_ACA48900.1_1 [protein=polyprotein] [protein_id=ACA48900.1] [location=74..10249]
EU482634.1_cds_ACA48901.1_1 [protein=polyprotein] [protein_id=ACA48901.1] [location=75..10250]
EU482635.1_cds_ACA48902.1_1 [protein=polyprotein] [protein_id=ACA48902.1] [location=74..10249]
EU482636.1_cds_ACA48903.1_1 [protein=polyprotein] [protein_id=ACA48903.1] [location=74..10249]
EU482637.1_cds_ACA48904.1_1 [protein=polyprotein] [protein_id=ACA48904.1] [location=74..10249]
EU482638.1_cds_ACA48905.1_1 [protein=polyprotein] [protein_id=ACA48905.1] [location=75..10250]
EU482639.1_cds_ACA48906.1_1 [protein=polyprotein] [protein_id=ACA48906.1] [location=74..10249]
EU482640.1_cds_ACA48907.1_1 [protein=polyprotein] [protein_id=ACA48907.1] [location=75..10250]
EU482641.1_cds_ACA48908.1_1 [protein=polyprotein] [protein_id=ACA48908.1] [location=75..10250]
EU482642.1_cds_ACA48909.1_1 [protein=polyprotein] [protein_id=ACA48909.1] [location=75..10250]
EU482643.1_cds_ACA48910.1_1 [protein=polyprotein] [protein_id=ACA48910.1] [location=75..10250]
EU482644.1_cds_ACA48911.1_1 [protein=polyprotein] [protein_id=ACA48911.1] [location=75..10250]
EU482645.1_cds_ACA48912.1_1 [protein=polyprotein] [protein_id=ACA48912.1] [location=75..10250]
EU482646.1_cds_ACA48913.1_1 [protein=polyprotein] [protein_id=ACA48913.1] [location=57..10232]
EU482647.1_cds_ACA48914.1_1 [protein=polyprotein] [protein_id=ACA48914.1] [location=75..10250]
EU482648.1_cds_ACA48915.1_1 [protein=polyprotein] [protein_id=ACA48915.1] [location=75..10250]
EU482649.1_cds_ACA48916.1_1 [protein=polyprotein] [protein_id=ACA48916.1] [location=75..10250]
EU482650.1_cds_ACA48917.1_1 [protein=polyprotein] [protein_id=ACA48917.1] [location=75..10250]
EU482651.1_cds_ACA48918.1_1 [protein=polyprotein] [protein_id=ACA48918.1] [location=75..10250]
EU482652.1_cds_ACA48919.1_1 [protein=polyprotein] [protein_id=ACA48919.1] [location=75..10250]
EU482653.1_cds_ACA48920.1_1 [protein=polyprotein] [protein_id=ACA48920.1] [location=75..10250]
EU482654.1_cds_ACA48921.1_1 [protein=polyprotein] [protein_id=ACA48921.1] [location=75..10250]
EU482655.1_cds_ACA48922.1_1 [protein=polyprotein] [protein_id=ACA48922.1] [location=75..10250]
EU482656.1_cds_ACA48923.1_1 [protein=polyprotein] [protein_id=ACA48923.1] [location=70..10245]
EU482657.1_cds_ACA48924.1_1 [protein=polyprotein] [protein_id=ACA48924.1] [location=75..10250]
EU482658.1_cds_ACA48925.1_1 [protein=polyprotein] [protein_id=ACA48925.1] [location=75..10250]
EU482659.1_cds_ACA48926.1_1 [protein=polyprotein] [protein_id=ACA48926.1] [location=75..10250]
EU482660.1_cds_ACA48927.1_1 [protein=polyprotein] [protein_id=ACA48927.1] [location=63..10238]
EU482661.1_cds_ACA48928.1_1 [protein=polyprotein] [protein_id=ACA48928.1] [location=75..10250]
EU482662.1_cds_ACA48929.1_1 [protein=polyprotein] [protein_id=ACA48929.1] [location=66..10241]
EU482663.1_cds_ACA48930.1_1 [protein=polyprotein] [protein_id=ACA48930.1] [location=75..10250]
EU482664.1_cds_ACA48931.1_1 [protein=polyprotein] [protein_id=ACA48931.1] [location=75..10250]
EU482665.1_cds_ACA48932.1_1 [protein=polyprotein] [protein_id=ACA48932.1] [location=68..10243]
EU482666.1_cds_ACA48933.1_1 [protein=polyprotein] [protein_id=ACA48933.1] [location=75..10250]
EU482667.1_cds_ACA48934.1_1 [protein=polyprotein] [protein_id=ACA48934.1] [location=58..10233]
EU482668.1_cds_ACA48935.1_1 [protein=polyprotein] [protein_id=ACA48935.1] [location=75..10250]
EU482669.1_cds_ACA48936.1_1 [protein=polyprotein] [protein_id=ACA48936.1] [location=62..10237]
EU482670.1_cds_ACA48937.1_1 [protein=polyprotein] [protein_id=ACA48937.1] [location=75..10250]
EU482671.1_cds_ACA48938.1_1 [protein=polyprotein] [protein_id=ACA48938.1] [location=57..10232]
EU482672.1_cds_ACA48939.1_1 [protein=polyprotein] [protein_id=ACA48939.1] [location=75..10250]
EU482673.1_cds_ACA48940.1_1 [protein=polyprotein] [protein_id=ACA48940.1] [location=74..10249]
EU482674.1_cds_ACA48941.1_1 [protein=polyprotein] [protein_id=ACA48941.1] [location=75..10250]
EU482675.1_cds_ACA48942.1_1 [protein=polyprotein] [protein_id=ACA48942.1] [location=75..10250]
EU482676.1_cds_ACA48943.1_1 [protein=polyprotein] [protein_id=ACA48943.1] [location=75..10250]
EU482677.1_cds_ACA48944.1_1 [protein=polyprotein] [protein_id=ACA48944.1] [location=75..10250]
EU482678.1_cds_ACA48945.1_1 [protein=polyprotein] [protein_id=ACA48945.1] [location=75..10250]
EU482679.1_cds_ACA48946.1_1 [protein=polyprotein] [protein_id=ACA48946.1] [location=75..10250]
EU482680.1_cds_ACA48947.1_1 [protein=polyprotein] [protein_id=ACA48947.1] [location=74..10249]
EU482681.1_cds_ACA48948.1_1 [protein=polyprotein] [protein_id=ACA48948.1] [location=74..10249]
EU482682.1_cds_ACA48949.1_1 [protein=polyprotein] [protein_id=ACA48949.1] [location=75..10250]
EU482683.1_cds_ACA48950.1_1 [protein=polyprotein] [protein_id=ACA48950.1] [location=75..10250]
EU482684.1_cds_ACA48951.1_1 [protein=polyprotein] [protein_id=ACA48951.1] [location=75..10250]
EU482685.1_cds_ACA48952.1_1 [protein=polyprotein] [protein_id=ACA48952.1] [location=75..10250]
EU482686.1_cds_ACA48953.1_1 [protein=polyprotein] [protein_id=ACA48953.1] [location=75..10250]
EU482687.1_cds_ACA48954.1_1 [protein=polyprotein] [protein_id=ACA48954.1] [location=75..10250]
EU482688.1_cds_ACA48955.1_1 [protein=polyprotein] [protein_id=ACA48955.1] [location=74..10249]
EU482689.1_cds_ACA48956.1_1 [protein=polyprotein] [protein_id=ACA48956.1] [location=75..10250]
EU482690.1_cds_ACA48957.1_1 [protein=polyprotein] [protein_id=ACA48957.1] [location=75..10250]
EU482691.1_cds_ACA48958.1_1 [protein=polyprotein] [protein_id=ACA48958.1] [location=75..10250]
EU482692.1_cds_ACA48959.1_1 [protein=polyprotein] [protein_id=ACA48959.1] [location=75..10250]
EU482693.1_cds_ACA48960.1_1 [protein=polyprotein] [protein_id=ACA48960.1] [location=68..10243]
EU482694.1_cds_ACA48961.1_1 [protein=polyprotein] [protein_id=ACA48961.1] [location=75..10250]
EU482695.1_cds_ACA48962.1_1 [protein=polyprotein] [protein_id=ACA48962.1] [location=65..10240]
EU482696.1_cds_ACA48963.1_1 [protein=polyprotein] [protein_id=ACA48963.1] [location=62..10237]
EU482697.1_cds_ACA48964.1_1 [protein=polyprotein] [protein_id=ACA48964.1] [location=75..10250]
EU482698.1_cds_ACA48965.1_1 [protein=polyprotein] [protein_id=ACA48965.1] [location=75..10250]
EU482699.1_cds_ACA48966.1_1 [protein=polyprotein] [protein_id=ACA48966.1] [location=75..10250]
EU482700.1_cds_ACA48967.1_1 [protein=polyprotein] [protein_id=ACA48967.1] [location=75..10250]
EU482701.1_cds_ACA48968.1_1 [protein=polyprotein] [protein_id=ACA48968.1] [location=75..10250]
EU482702.1_cds_ACA48969.1_1 [protein=polyprotein] [protein_id=ACA48969.1] [location=75..10250]
EU482703.1_cds_ACA48970.1_1 [protein=polyprotein] [protein_id=ACA48970.1] [location=75..10250]
EU482704.1_cds_ACA48971.1_1 [protein=polyprotein] [protein_id=ACA48971.1] [location=75..10250]
EU482705.1_cds_ACA48972.1_1 [protein=polyprotein] [protein_id=ACA48972.1] [location=75..10250]
EU482719.1_cds_ACA48986.1_1 [protein=polyprotein] [protein_id=ACA48986.1] [location=75..10250]
EU482720.1_cds_ACA48987.1_1 [protein=polyprotein] [protein_id=ACA48987.1] [location=75..10250]
EU482721.1_cds_ACA48988.1_1 [protein=polyprotein] [protein_id=ACA48988.1] [location=75..10250]
EU482722.1_cds_ACA48989.1_1 [protein=polyprotein] [protein_id=ACA48989.1] [location=65..10240]
EU482723.1_cds_ACA48990.1_1 [protein=polyprotein] [protein_id=ACA48990.1] [location=75..10250]
EU482724.1_cds_ACA48991.1_1 [protein=polyprotein] [protein_id=ACA48991.1] [location=75..10250]
EU482725.1_cds_ACA48992.1_1 [protein=polyprotein] [protein_id=ACA48992.1] [location=75..10250]
EU482726.1_cds_ACA48993.1_1 [protein=polyprotein] [protein_id=ACA48993.1] [location=75..10250]
EU482727.1_cds_ACA48994.1_1 [protein=polyprotein] [protein_id=ACA48994.1] [location=75..10250]
EU482728.1_cds_ACA48995.1_1 [protein=polyprotein] [protein_id=ACA48995.1] [location=75..10250]
EU482729.1_cds_ACA48996.1_1 [protein=polyprotein] [protein_id=ACA48996.1] [location=75..10250]
EU482730.1_cds_ACA48997.1_1 [protein=polyprotein] [protein_id=ACA48997.1] [location=65..10240]
EU482731.1_cds_ACA48998.1_1 [protein=polyprotein] [protein_id=ACA48998.1] [location=75..10250]
EU482732.1_cds_ACA48999.1_1 [protein=polyprotein] [protein_id=ACA48999.1] [location=75..10250]
EU482733.1_cds_ACA49000.1_1 [protein=polyprotein] [protein_id=ACA49000.1] [location=75..10250]
EU482734.1_cds_ACA49001.1_1 [protein=polyprotein] [protein_id=ACA49001.1] [location=75..10250]
EU482735.1_cds_ACA49002.1_1 [protein=polyprotein] [protein_id=ACA49002.1] [location=75..10250]
EU482736.1_cds_ACA49003.1_1 [protein=polyprotein] [protein_id=ACA49003.1] [location=75..10250]
EU482737.1_cds_ACA49004.1_1 [protein=polyprotein] [protein_id=ACA49004.1] [location=75..10250]
EU482738.1_cds_ACA49005.1_1 [protein=polyprotein] [protein_id=ACA49005.1] [location=75..10250]
EU482739.1_cds_ACA49006.1_1 [protein=polyprotein] [protein_id=ACA49006.1] [location=75..10250]
EU482740.1_cds_ACA49007.1_1 [protein=polyprotein] [protein_id=ACA49007.1] [location=75..10250]
EU482741.1_cds_ACA49008.1_1 [protein=polyprotein] [protein_id=ACA49008.1] [location=75..10250]
EU482742.1_cds_ACA49009.1_1 [protein=polyprotein] [protein_id=ACA49009.1] [location=75..10250]
EU482743.1_cds_ACA49010.1_1 [protein=polyprotein] [protein_id=ACA49010.1] [location=75..10250]
EU482744.1_cds_ACA49011.1_1 [protein=polyprotein] [protein_id=ACA49011.1] [location=74..10249]
EU482745.1_cds_ACA49012.1_1 [protein=polyprotein] [protein_id=ACA49012.1] [location=75..10250]
EU482746.1_cds_ACA49013.1_1 [protein=polyprotein] [protein_id=ACA49013.1] [location=75..10250]
EU482747.1_cds_ACA49014.1_1 [protein=polyprotein] [protein_id=ACA49014.1] [location=75..10250]
EU482748.1_cds_ACA49015.1_1 [protein=polyprotein] [protein_id=ACA49015.1] [location=76..10251]
EU482749.1_cds_ACA49016.1_1 [protein=polyprotein] [protein_id=ACA49016.1] [location=74..10249]
EU482750.1_cds_ACA49017.1_1 [protein=polyprotein] [protein_id=ACA49017.1] [location=74..10249]
EU482751.1_cds_ACA49018.1_1 [protein=polyprotein] [protein_id=ACA49018.1] [location=75..10250]
EU482752.1_cds_ACA49019.1_1 [protein=polyprotein] [protein_id=ACA49019.1] [location=74..10249]
EU482753.1_cds_ACA49020.1_1 [protein=polyprotein] [protein_id=ACA49020.1] [location=74..10249]
EU482754.1_cds_ACA49021.1_1 [protein=polyprotein] [protein_id=ACA49021.1] [location=65..10240]
EU482755.1_cds_ACA49022.1_1 [protein=polyprotein] [protein_id=ACA49022.1] [location=74..10249]
EU482756.1_cds_ACA49023.1_1 [protein=polyprotein] [protein_id=ACA49023.1] [location=74..10249]
EU482757.1_cds_ACA49024.1_1 [protein=polyprotein] [protein_id=ACA49024.1] [location=70..10245]
EU482758.1_cds_ACA49025.1_1 [protein=polyprotein] [protein_id=ACA49025.1] [location=74..10249]
EU482759.1_cds_ACA49026.1_1 [protein=polyprotein] [protein_id=ACA49026.1] [location=74..10249]
EU482760.1_cds_ACA49027.1_1 [protein=polyprotein] [protein_id=ACA49027.1] [location=74..10249]
EU482761.1_cds_ACA49028.1_1 [protein=polyprotein] [protein_id=ACA49028.1] [location=74..10249]
EU482762.1_cds_ACA49029.1_1 [protein=polyprotein] [protein_id=ACA49029.1] [location=74..10249]
EU482763.1_cds_ACA49030.1_1 [protein=polyprotein] [protein_id=ACA49030.1] [location=74..10249]
EU482766.1_cds_ACA49033.1_1 [protein=polyprotein] [protein_id=ACA49033.1] [location=75..10250]
EU482769.1_cds_ACA49036.1_1 [protein=polyprotein] [protein_id=ACA49036.1] [location=74..10249]
EU482770.1_cds_ACA49037.1_1 [protein=polyprotein] [protein_id=ACA49037.1] [location=74..10249]
EU482771.1_cds_ACA49038.1_1 [protein=polyprotein] [protein_id=ACA49038.1] [location=74..10249]
EU482772.1_cds_ACA49039.1_1 [protein=polyprotein] [protein_id=ACA49039.1] [location=75..10250]
EU482773.1_cds_ACA49040.1_1 [protein=polyprotein] [protein_id=ACA49040.1] [location=75..10250]
EU482774.1_cds_ACA49041.1_1 [protein=polyprotein] [protein_id=ACA49041.1] [location=75..10250]
EU482775.1_cds_ACA49042.1_1 [protein=polyprotein] [protein_id=ACA49042.1] [location=75..10250]
EU482776.1_cds_ACA49043.1_1 [protein=polyprotein] [protein_id=ACA49043.1] [location=75..10250]
EU482777.1_cds_ACA49044.1_1 [protein=polyprotein] [protein_id=ACA49044.1] [location=75..10250]
EU482778.1_cds_ACA49045.1_1 [protein=polyprotein] [protein_id=ACA49045.1] [location=75..10250]
EU482779.1_cds_ACA49046.1_1 [protein=polyprotein] [protein_id=ACA49046.1] [location=75..10250]
EU482780.1_cds_ACA49047.1_1 [protein=polyprotein] [protein_id=ACA49047.1] [location=75..10250]
EU482781.1_cds_ACA49048.1_1 [protein=polyprotein] [protein_id=ACA49048.1] [location=75..10250]
EU482782.1_cds_ACA49049.1_1 [protein=polyprotein] [protein_id=ACA49049.1] [location=75..10250]
EU482783.1_cds_ACA49050.1_1 [protein=polyprotein] [protein_id=ACA49050.1] [location=75..10250]
EU482784.1_cds_ACA49051.1_1 [protein=polyprotein] [protein_id=ACA49051.1] [location=76..10251]
EU482785.1_cds_ACA49052.1_1 [protein=polyprotein] [protein_id=ACA49052.1] [location=75..10250]
EU482786.1_cds_ACA49053.1_1 [protein=polyprotein] [protein_id=ACA49053.1] [location=75..10250]
EU482787.1_cds_ACA49054.1_1 [protein=polyprotein] [protein_id=ACA49054.1] [location=75..10250]
EU482788.1_cds_ACA49055.1_1 [protein=polyprotein] [protein_id=ACA49055.1] [location=75..10250]
EU359009.1_cds_ABY65725.1_1 [protein=polyprotein] [protein_id=ABY65725.1] [location=97..10272]
DQ448231.2_cds_ABE02262.2_1 [protein=polyprotein] [protein_id=ABE02262.2] [location=97..10272]
AY858035.2_cds_AAW51406.2_1 [protein=polyprotein] [protein_id=AAW51406.2] [location=97..10272]
AY858036.2_cds_AAW51407.2_1 [protein=polyprotein] [protein_id=AAW51407.2] [location=97..10272]
AB189122.1_cds_BAD42415.1_1 [protein=polyprotein] [protein_id=BAD42415.1] [location=97..10272]
AB189123.1_cds_BAD42416.1_1 [protein=polyprotein] [protein_id=BAD42416.1] [location=97..10272]
AB189124.1_cds_BAD42417.1_1 [protein=polyprotein] [protein_id=BAD42417.1] [location=97..10272]
AB122020.1_cds_BAD36758.1_1 [protein=polyprotein] [protein_id=BAD36758.1] [location=97..10272]
AB122021.1_cds_BAD36759.1_1 [protein=polyprotein] [protein_id=BAD36759.1] [location=97..10272]
AB122022.1_cds_BAD36760.1_1 [protein=polyprotein] [protein_id=BAD36760.1] [location=97..10272]
AF208496.1_cds_AAG30730.1_1 [protein=polyprotein] [protein_id=AAG30730.1] [location=97..10272]

## Sheet: Dengue 3 viruses (n=856)
Accession number in the NCBI
OK605762.1_cds_UDI89635.1_1 [gene=POLY] [protein=polyprotein] [protein_id=UDI89635.1] [location
OK605763.1_cds_UDI89636.1_1 [gene=POLY] [protein=polyprotein] [protein_id=UDI89636.1] [location
OK605764.1_cds_UDI89637.1_1 [gene=POLY] [protein=polyprotein] [protein_id=UDI89637.1] [location
OK605765.1_cds_UDI89638.1_1 [gene=POLY] [protein=polyprotein] [protein_id=UDI89638.1] [location
OK605766.1_cds_UDI89639.1_1 [gene=POLY] [protein=polyprotein] [protein_id=UDI89639.1] [location
MW192820.1_cds_QOV09267.1_1 [gene=POLY] [protein=polyprotein] [protein_id=QOV09267.1] [location
MW192821.1_cds_QOV09268.1_1 [gene=POLY] [protein=polyprotein] [protein_id=QOV09268.1] [location
MW192822.1_cds_QOV09269.1_1 [gene=POLY] [protein=polyprotein] [protein_id=QOV09269.1] [location
MW192823.1_cds_QOV09270.1_1 [gene=POLY] [protein=polyprotein] [protein_id=QOV09270.1] [location
MW192824.1_cds_QOV09271.1_1 [gene=POLY] [protein=polyprotein] [protein_id=QOV09271.1] [location
MZ284953.1_cds_QVV21321.1_1 [gene=POLY] [protein=polyprotein] [protein_id=QVV21321.1] [location
MZ285732.1_cds_QVV22270.1_1 [gene=POLY] [protein=polyprotein] [protein_id=QVV22270.1] [location
MN253125.1_cds_QEP41653.1_1 [gene=POLY] [protein=polyprotein] [protein_id=QEP41653.1] [location
MT076948.1_cds_QIB99401.1_1 [gene=POLY] [protein=polyprotein] [protein_id=QIB99401.1] [location
LC436676.1_cds_BBH51324.1_1 [protein=polyprotein] [protein_id=BBH51324.1] [location=75..10247]
LC436677.1_cds_BBH51325.1_1 [protein=polyprotein] [protein_id=BBH51325.1] [location=75..10247]
MN018367.1_cds_QDG00729.1_1 [gene=POLY] [protein=polyprotein] [protein_id=QDG00729.1] [location
MN018368.1_cds_QDG00730.1_1 [gene=POLY] [protein=polyprotein] [protein_id=QDG00730.1] [location
MN018369.1_cds_QDG00731.1_1 [gene=POLY] [protein=polyprotein] [protein_id=QDG00731.1] [location
MN018370.1_cds_QDG00732.1_1 [gene=POLY] [protein=polyprotein] [protein_id=QDG00732.1] [location
MN018371.1_cds_QDG00733.1_1 [gene=POLY] [protein=polyprotein] [protein_id=QDG00733.1] [location
MN018372.1_cds_QDG00734.1_1 [gene=POLY] [protein=polyprotein] [protein_id=QDG00734.1] [location
MN018373.1_cds_QDG00735.1_1 [gene=POLY] [protein=polyprotein] [protein_id=QDG00735.1] [location
MN018374.1_cds_QDG00736.1_1 [gene=POLY] [protein=polyprotein] [protein_id=QDG00736.1] [location
MN018375.1_cds_QDG00737.1_1 [gene=POLY] [protein=polyprotein] [protein_id=QDG00737.1] [location
MN018376.1_cds_QDG00738.1_1 [gene=POLY] [protein=polyprotein] [protein_id=QDG00738.1] [location
MN018377.1_cds_QDG00739.1_1 [gene=POLY] [protein=polyprotein] [protein_id=QDG00739.1] [location
MN018378.1_cds_QDG00740.1_1 [gene=POLY] [protein=polyprotein] [protein_id=QDG00740.1] [location
MN018379.1_cds_QDG00741.1_1 [gene=POLY] [protein=polyprotein] [protein_id=QDG00741.1] [location
MN018380.1_cds_QDG00742.1_1 [gene=POLY] [protein=polyprotein] [protein_id=QDG00742.1] [location
MN018381.1_cds_QDG00743.1_1 [gene=POLY] [protein=polyprotein] [protein_id=QDG00743.1] [location
MN018382.1_cds_QDG00744.1_1 [gene=POLY] [protein=polyprotein] [protein_id=QDG00744.1] [location
MN018383.1_cds_QDG00745.1_1 [gene=POLY] [protein=polyprotein] [protein_id=QDG00745.1] [location
MN018384.1_cds_QDG00746.1_1 [gene=POLY] [protein=polyprotein] [protein_id=QDG00746.1] [location
MN018385.1_cds_QDG00747.1_1 [gene=POLY] [protein=polyprotein] [protein_id=QDG00747.1] [location
MN018386.1_cds_QDG00748.1_1 [gene=POLY] [protein=polyprotein] [protein_id=QDG00748.1] [location
MN018387.1_cds_QDG00749.1_1 [gene=POLY] [protein=polyprotein] [protein_id=QDG00749.1] [location
MN018388.1_cds_QDG00750.1_1 [gene=POLY] [protein=polyprotein] [protein_id=QDG00750.1] [location
MN018389.1_cds_QDG00751.1_1 [gene=POLY] [protein=polyprotein] [protein_id=QDG00751.1] [location
LC379193.1_cds_BBD74779.1_1 [protein=polyprotein] [protein_id=BBD74779.1] [location=74..10246]
LC379194.1_cds_BBD74780.1_1 [protein=polyprotein] [protein_id=BBD74780.1] [location=74..10246]
LC379195.1_cds_BBD74781.1_1 [protein=polyprotein] [protein_id=BBD74781.1] [location=74..10246]
LC379196.1_cds_BBD74782.1_1 [protein=polyprotein] [protein_id=BBD74782.1] [location=74..10246]
LC379197.1_cds_BBD74783.1_1 [protein=polyprotein] [protein_id=BBD74783.1] [location=69..10241]
MH891766.1_cds_QBA57533.1_1 [gene=POLY] [protein=polyprotein] [protein_id=QBA57533.1] [location
MK005258.1_cds_QBR34687.1_1 [gene=POLY] [protein=polyprotein] [protein_id=QBR34687.1] [location
MH823209.1_cds_QBB90023.1_1 [gene=POLY] [protein=polyprotein] [protein_id=QBB90023.1] [location
MH888332.1_cds_QBA29682.1_1 [gene=POLY] [protein=polyprotein] [protein_id=QBA29682.1] [location
MH888333.1_cds_QBA29683.1_1 [gene=POLY] [protein=polyprotein] [protein_id=QBA29683.1] [location
MG721059.1_cds_AXX75610.1_1 [protein=polyprotein] [protein_id=AXX75610.1] [location=93..10265]
MG721061.1_cds_AXX75611.1_1 [protein=polyprotein] [protein_id=AXX75611.1] [location=93..10265]
MG721064.1_cds_AXX75612.1_1 [protein=polyprotein] [protein_id=AXX75612.1] [location=29..9967] [
MH822957.1_cds_AXX75613.1_1 [protein=polyprotein] [protein_id=AXX75613.1] [location=95..10267]
MF682966.1_cds_ASX95464.1_1 [protein=polyprotein] [protein_id=ASX95464.1] [location=95..10267]
MF682967.1_cds_ASX95465.1_1 [protein=polyprotein] [protein_id=ASX95465.1] [location=95..10267]
MF682968.1_cds_ASX95466.1_1 [protein=polyprotein] [protein_id=ASX95466.1] [location=95..10267]
MF682969.1_cds_ASX95467.1_1 [protein=polyprotein] [protein_id=ASX95467.1] [location=95..10267]
MF682970.1_cds_ASX95468.1_1 [protein=polyprotein] [protein_id=ASX95468.1] [location=95..10267]
MF682971.1_cds_ASX95469.1_1 [protein=polyprotein] [protein_id=ASX95469.1] [location=95..10267]
MF682972.1_cds_ASX95470.1_1 [protein=polyprotein] [protein_id=ASX95470.1] [location=95..10267]
MF682973.1_cds_ASX95471.1_1 [protein=polyprotein] [protein_id=ASX95471.1] [location=95..10267]
MF682974.1_cds_ASX95472.1_1 [protein=polyprotein] [protein_id=ASX95472.1] [location=95..10267]
MF682975.1_cds_ASX95473.1_1 [protein=polyprotein] [protein_id=ASX95473.1] [location=95..10267]
MH544647.1_cds_AXG22237.1_1 [protein=polyprotein] [protein_id=AXG22237.1] [location=95..10267]
MH544649.1_cds_AXG22238.1_1 [protein=polyprotein] [protein_id=AXG22238.1] [location=95..10267]
MH544650.1_cds_AXG22239.1_1 [protein=polyprotein] [protein_id=AXG22239.1] [location=95..10267]
MH544651.1_cds_AXG22240.1_1 [protein=polyprotein] [protein_id=AXG22240.1] [location=95..10267]
KY794786.1_cds_AVD96674.1_1 [protein=polyprotein] [protein_id=AVD96674.1] [location=78..10250]
KY794787.1_cds_AVD96675.1_1 [protein=polyprotein] [protein_id=AVD96675.1] [location=52..10224]
KY794788.1_cds_AVD96676.1_1 [protein=polyprotein] [protein_id=AVD96676.1] [location=24..10196]
KY794789.1_cds_AVD96677.1_1 [protein=polyprotein] [protein_id=AVD96677.1] [location=67..10239]
KY794790.1_cds_AVD96678.1_1 [protein=polyprotein] [protein_id=AVD96678.1] [location=67..10239]
KY670634.1_cds_AUY62012.1_1 [protein=polyprotein] [protein_id=AUY62012.1] [location=70..10242]
MF370226.1_cds_ASN77913.1_1 [protein=polyprotein] [protein_id=ASN77913.1] [location=56..10228]
KY863456.1_cds_ASK05287.1_1 [protein=polyprotein] [protein_id=ASK05287.1] [location=95..10267]
KY921906.1_cds_ARM59247.1_1 [protein=polyprotein] [protein_id=ARM59247.1] [location=95..10267]
KY921907.1_cds_ARM59248.1_1 [protein=polyprotein] [protein_id=ARM59248.1] [location=95..10267]
KU509278.1_cds_ANC57604.1_1 [protein=polyprotein] [protein_id=ANC57604.1] [location=63..10235]
KU509279.1_cds_ANC57605.1_1 [protein=polyprotein] [protein_id=ANC57605.1] [location=54..10226]
KU509280.1_cds_ANC57606.1_1 [protein=polyprotein] [protein_id=ANC57606.1] [location=51..10223]
KU509281.1_cds_ANC57607.1_1 [protein=polyprotein] [protein_id=ANC57607.1] [location=49..10221]
KU509282.1_cds_ANC57608.1_1 [protein=polyprotein] [protein_id=ANC57608.1] [location=47..10219]
KU509283.1_cds_ANC57609.1_1 [protein=polyprotein] [protein_id=ANC57609.1] [location=62..10234]
KU509284.1_cds_ANC57610.1_1 [protein=polyprotein] [protein_id=ANC57610.1] [location=75..10247]
KU509285.1_cds_ANC57611.1_1 [protein=polyprotein] [protein_id=ANC57611.1] [location=64..10236]
KU509286.1_cds_ANC57612.1_1 [protein=polyprotein] [protein_id=ANC57612.1] [location=77..10249]
KX380839.1_cds_ANS59198.1_1 [protein=polyprotein] [protein_id=ANS59198.1] [location=62..10234]
KX380840.1_cds_ANS59199.1_1 [protein=polyprotein] [protein_id=ANS59199.1] [location=62..10234]
KX380841.1_cds_ANS59200.1_1 [protein=polyprotein] [protein_id=ANS59200.1] [location=62..10234]
KX380842.1_cds_ANS59201.1_1 [protein=polyprotein] [protein_id=ANS59201.1] [location=63..10235]
KU216208.1_cds_AML29862.1_1 [protein=polyprotein] [protein_id=AML29862.1] [location=86..10258]
KU216209.1_cds_AML29863.1_1 [protein=polyprotein] [protein_id=AML29863.1] [location=88..10260]
KT726340.1_cds_AMH87187.1_1 [protein=polyprotein] [protein_id=AMH87187.1] [location=74..10246]
KT726341.1_cds_AMH87188.1_1 [protein=polyprotein] [protein_id=AMH87188.1] [location=74..10246]
KT726342.1_cds_AMH87189.1_1 [protein=polyprotein] [protein_id=AMH87189.1] [location=74..10246]
KT726343.1_cds_AMH87190.1_1 [protein=polyprotein] [protein_id=AMH87190.1] [location=74..10246]
KT726344.1_cds_AMH87191.1_1 [protein=polyprotein] [protein_id=AMH87191.1] [location=74..10246]
KT726345.1_cds_AMH87192.1_1 [protein=polyprotein] [protein_id=AMH87192.1] [location=74..10246]
KT726346.1_cds_AMH87193.1_1 [protein=polyprotein] [protein_id=AMH87193.1] [location=74..10246]
KT726347.1_cds_AMH87194.1_1 [protein=polyprotein] [protein_id=AMH87194.1] [location=74..10246]
KT726348.1_cds_AMH87195.1_1 [protein=polyprotein] [protein_id=AMH87195.1] [location=74..10246]
KT726349.1_cds_AMH87196.1_1 [protein=polyprotein] [protein_id=AMH87196.1] [location=74..10246]
KT726350.1_cds_AMH87197.1_1 [protein=polyprotein] [protein_id=AMH87197.1] [location=74..10246]
KT726351.1_cds_AMH87198.1_1 [protein=polyprotein] [protein_id=AMH87198.1] [location=74..10246]
KT726352.1_cds_AMH87199.1_1 [protein=polyprotein] [protein_id=AMH87199.1] [location=74..10246]
KT726353.1_cds_AMH87200.1_1 [protein=polyprotein] [protein_id=AMH87200.1] [location=74..10246]
KT726354.1_cds_AMH87201.1_1 [protein=polyprotein] [protein_id=AMH87201.1] [location=74..10246]
KT726355.1_cds_AMH87202.1_1 [protein=polyprotein] [protein_id=AMH87202.1] [location=74..10246]
KT726356.1_cds_AMH87203.1_1 [protein=polyprotein] [protein_id=AMH87203.1] [location=74..10246]
KT726357.1_cds_AMH87204.1_1 [protein=polyprotein] [protein_id=AMH87204.1] [location=74..10246]
KT726358.1_cds_AMH87205.1_1 [protein=polyprotein] [protein_id=AMH87205.1] [location=74..10246]
KT726359.1_cds_AMH87206.1_1 [protein=polyprotein] [protein_id=AMH87206.1] [location=74..10246]
KT726360.1_cds_AMH87207.1_1 [protein=polyprotein] [protein_id=AMH87207.1] [location=74..10246]
KT726361.1_cds_AMH87208.1_1 [protein=polyprotein] [protein_id=AMH87208.1] [location=74..10246]
KU050695.1_cds_ALS05358.1_1 [protein=polyprotein] [protein_id=ALS05358.1] [location=95..10267]
KM190937.1_cds_AIG60036.1_1 [protein=polyprotein] [protein_id=AIG60036.1] [location=81..10253]
KJ737429.1_cds_AJA37730.1_1 [protein=polyprotein] [protein_id=AJA37730.1] [location=95..10267]
KJ737430.1_cds_AJA37731.1_1 [protein=polyprotein] [protein_id=AJA37731.1] [location=95..10267]
KJ622191.1_cds_AIO11764.1_1 [protein=polyprotein] [protein_id=AIO11764.1] [location=95..10267]
KJ622192.1_cds_AIO11765.1_1 [protein=polyprotein] [protein_id=AIO11765.1] [location=95..10267]
KJ622193.1_cds_AIO11766.1_1 [protein=polyprotein] [protein_id=AIO11766.1] [location=95..10267]
KJ622194.1_cds_AIO11767.1_1 [protein=polyprotein] [protein_id=AIO11767.1] [location=95..10267]
KJ622195.1_cds_AIO11768.1_1 [protein=polyprotein] [protein_id=AIO11768.1] [location=95..10267]
KJ622196.1_cds_AIO11769.1_1 [protein=polyprotein] [protein_id=AIO11769.1] [location=95..10267]
KJ622197.1_cds_AIO11770.1_1 [protein=polyprotein] [protein_id=AIO11770.1] [location=95..10267]
KJ622198.1_cds_AIO11771.1_1 [protein=polyprotein] [protein_id=AIO11771.1] [location=95..10267]
KJ622199.1_cds_AIO11772.1_1 [protein=polyprotein] [protein_id=AIO11772.1] [location=95..10267]
KC762681.1_cds_AHG06365.1_1 [protein=polyprotein] [protein_id=AHG06365.1] [location=95..10267]
KC762682.1_cds_AHG06366.1_1 [protein=polyprotein] [protein_id=AHG06366.1] [location=95..10267]
KC762683.1_cds_AHG06367.1_1 [protein=polyprotein] [protein_id=AHG06367.1] [location=95..10267]
KC762684.1_cds_AHG06368.1_1 [protein=polyprotein] [protein_id=AHG06368.1] [location=95..10267]
KC762685.1_cds_AHG06369.1_1 [protein=polyprotein] [protein_id=AHG06369.1] [location=95..10267]
KC762686.1_cds_AHG06370.1_1 [protein=polyprotein] [protein_id=AHG06370.1] [location=95..10267]
KC762687.1_cds_AHG06371.1_1 [protein=polyprotein] [protein_id=AHG06371.1] [location=95..10267]
KC762688.1_cds_AHG06372.1_1 [protein=polyprotein] [protein_id=AHG06372.1] [location=95..10267]
KC762689.1_cds_AHG06373.1_1 [protein=polyprotein] [protein_id=AHG06373.1] [location=95..10267]
KC762690.1_cds_AHG06374.1_1 [protein=polyprotein] [protein_id=AHG06374.1] [location=95..10267]
KC762691.1_cds_AHG06375.1_1 [protein=polyprotein] [protein_id=AHG06375.1] [location=95..10267]
KC762692.1_cds_AHG06376.1_1 [protein=polyprotein] [protein_id=AHG06376.1] [location=95..10267]
KC762693.1_cds_AHG06377.1_1 [protein=polyprotein] [protein_id=AHG06377.1] [location=95..10267]
KF971709.1_cds_AHC98420.1_1 [protein=polyprotein] [protein_id=AHC98420.1] [location=77..10249]
KF973476.1_cds_AHC98447.1_1 [protein=polyprotein] [protein_id=AHC98447.1] [location=95..10267]
KF973477.1_cds_AHC98448.1_1 [protein=polyprotein] [protein_id=AHC98448.1] [location=25..10197]
KF973478.1_cds_AHC98449.1_1 [protein=polyprotein] [protein_id=AHC98449.1] [location=95..10267]
KF973479.1_cds_AHC98450.1_1 [protein=polyprotein] [protein_id=AHC98450.1] [location=95..10267]
KF973480.1_cds_AHC98451.1_1 [protein=polyprotein] [protein_id=AHC98451.1] [location=95..10267]
KF973481.1_cds_AHC98452.1_1 [protein=polyprotein] [protein_id=AHC98452.1] [location=95..10267]
KF973482.1_cds_AHC98453.1_1 [protein=polyprotein] [protein_id=AHC98453.1] [location=95..10267]
KF973483.1_cds_AHC98454.1_1 [protein=polyprotein] [protein_id=AHC98454.1] [location=25..10197]
KF973484.1_cds_AHC98455.1_1 [protein=polyprotein] [protein_id=AHC98455.1] [location=95..10267]
KF973485.1_cds_AHC98456.1_1 [protein=polyprotein] [protein_id=AHC98456.1] [location=96..10268]
KF973486.1_cds_AHC98457.1_1 [protein=polyprotein] [protein_id=AHC98457.1] [location=95..10267]
KF973487.1_cds_AHC98458.1_1 [protein=polyprotein] [protein_id=AHC98458.1] [location=95..10267]
KJ830751.1_cds_AIH13925.1_1 [protein=polyprotein] [protein_id=AIH13925.1] [location=46..10218]
KJ643590.1_cds_AHX22016.1_1 [protein=polyprotein] [protein_id=AHX22016.1] [location=80..10252]
KF954945.1_cds_AHL17464.1_1 [protein=polyprotein] [protein_id=AHL17464.1] [location=74..10246]
KF954946.1_cds_AHL17465.1_1 [protein=polyprotein] [protein_id=AHL17465.1] [location=74..10246]
KF954947.1_cds_AHL17466.1_1 [protein=polyprotein] [protein_id=AHL17466.1] [location=63..10235]
KF954948.1_cds_AHL17467.1_1 [protein=polyprotein] [protein_id=AHL17467.1] [location=79..10251]
KF954949.1_cds_AHL17468.1_1 [protein=polyprotein] [protein_id=AHL17468.1] [location=79..10251]
KJ189256.1_cds_AHI43639.1_1 [protein=polyprotein] [protein_id=AHI43639.1] [location=81..10253]
KJ189257.1_cds_AHI43640.1_1 [protein=polyprotein] [protein_id=AHI43640.1] [location=81..10253]
KJ189258.1_cds_AHI43641.1_1 [protein=polyprotein] [protein_id=AHI43641.1] [location=80..10252]
KJ189259.1_cds_AHI43642.1_1 [protein=polyprotein] [protein_id=AHI43642.1] [location=80..10252]
KJ189260.1_cds_AHI43643.1_1 [protein=polyprotein] [protein_id=AHI43643.1] [location=80..10252]
KJ189261.1_cds_AHI43644.1_1 [protein=polyprotein] [protein_id=AHI43644.1] [location=84..10256]
KJ189262.1_cds_AHI43645.1_1 [protein=polyprotein] [protein_id=AHI43645.1] [location=80..10252]
KJ189263.1_cds_AHI43646.1_1 [protein=polyprotein] [protein_id=AHI43646.1] [location=81..10253]
KJ189264.1_cds_AHI43647.1_1 [protein=polyprotein] [protein_id=AHI43647.1] [location=81..10253]
KJ189265.1_cds_AHI43648.1_1 [protein=polyprotein] [protein_id=AHI43648.1] [location=81..10253]
KJ189266.1_cds_AHI43649.1_1 [protein=polyprotein] [protein_id=AHI43649.1] [location=84..10256]
KJ189267.1_cds_AHI43650.1_1 [protein=polyprotein] [protein_id=AHI43650.1] [location=81..10253]
KJ189268.1_cds_AHI43651.1_1 [protein=polyprotein] [protein_id=AHI43651.1] [location=80..10252]
KJ189269.1_cds_AHI43652.1_1 [protein=polyprotein] [protein_id=AHI43652.1] [location=81..10253]
KJ189270.1_cds_AHI43653.1_1 [protein=polyprotein] [protein_id=AHI43653.1] [location=81..10253]
KJ189271.1_cds_AHI43654.1_1 [protein=polyprotein] [protein_id=AHI43654.1] [location=80..10252]
KJ189272.1_cds_AHI43655.1_1 [protein=polyprotein] [protein_id=AHI43655.1] [location=81..10253]
KJ189273.1_cds_AHI43656.1_1 [protein=polyprotein] [protein_id=AHI43656.1] [location=81..10253]
KJ189274.1_cds_AHI43657.1_1 [protein=polyprotein] [protein_id=AHI43657.1] [location=81..10253]
KJ189275.1_cds_AHI43658.1_1 [protein=polyprotein] [protein_id=AHI43658.1] [location=81..10253]
KJ189276.1_cds_AHI43659.1_1 [protein=polyprotein] [protein_id=AHI43659.1] [location=81..10253]
KJ189277.1_cds_AHI43660.1_1 [protein=polyprotein] [protein_id=AHI43660.1] [location=81..10253]
KJ189278.1_cds_AHI43661.1_1 [protein=polyprotein] [protein_id=AHI43661.1] [location=80..10252]
KJ189279.1_cds_AHI43662.1_1 [protein=polyprotein] [protein_id=AHI43662.1] [location=80..10252]
KJ189280.1_cds_AHI43663.1_1 [protein=polyprotein] [protein_id=AHI43663.1] [location=80..10252]
KJ189281.1_cds_AHI43664.1_1 [protein=polyprotein] [protein_id=AHI43664.1] [location=80..10252]
KJ189282.1_cds_AHI43665.1_1 [protein=polyprotein] [protein_id=AHI43665.1] [location=80..10252]
KJ189283.1_cds_AHI43666.1_1 [protein=polyprotein] [protein_id=AHI43666.1] [location=81..10253]
KJ189284.1_cds_AHI43667.1_1 [protein=polyprotein] [protein_id=AHI43667.1] [location=81..10253]
KJ189285.1_cds_AHI43668.1_1 [protein=polyprotein] [protein_id=AHI43668.1] [location=80..10252]
KJ189286.1_cds_AHI43669.1_1 [protein=polyprotein] [protein_id=AHI43669.1] [location=81..10253]
KJ189287.1_cds_AHI43670.1_1 [protein=polyprotein] [protein_id=AHI43670.1] [location=81..10253]
KJ189288.1_cds_AHI43671.1_1 [protein=polyprotein] [protein_id=AHI43671.1] [location=80..10252]
KJ189289.1_cds_AHI43672.1_1 [protein=polyprotein] [protein_id=AHI43672.1] [location=80..10252]
KJ189290.1_cds_AHI43673.1_1 [protein=polyprotein] [protein_id=AHI43673.1] [location=80..10252]
KJ189291.1_cds_AHI43674.1_1 [protein=polyprotein] [protein_id=AHI43674.1] [location=80..10252]
KJ189292.1_cds_AHI43675.1_1 [protein=polyprotein] [protein_id=AHI43675.1] [location=82..10254]
KJ189293.1_cds_AHI43676.1_1 [protein=polyprotein] [protein_id=AHI43676.1] [location=81..10253]
KJ189294.1_cds_AHI43677.1_1 [protein=polyprotein] [protein_id=AHI43677.1] [location=80..10252]
KJ189295.1_cds_AHI43678.1_1 [protein=polyprotein] [protein_id=AHI43678.1] [location=81..10253]
KJ189296.1_cds_AHI43679.1_1 [protein=polyprotein] [protein_id=AHI43679.1] [location=84..10256]
KJ189297.1_cds_AHI43680.1_1 [protein=polyprotein] [protein_id=AHI43680.1] [location=80..10252]
KJ189298.1_cds_AHI43681.1_1 [protein=polyprotein] [protein_id=AHI43681.1] [location=80..10252]
KJ189299.1_cds_AHI43682.1_1 [protein=polyprotein] [protein_id=AHI43682.1] [location=80..10252]
KJ189300.1_cds_AHI43683.1_1 [protein=polyprotein] [protein_id=AHI43683.1] [location=80..10252]
KJ189301.1_cds_AHI43684.1_1 [protein=polyprotein] [protein_id=AHI43684.1] [location=81..10253]
KF824902.1_cds_AHI17474.1_1 [protein=polyprotein] [protein_id=AHI17474.1] [location=95..10267]
KF824903.1_cds_AHI17475.1_1 [protein=polyprotein] [protein_id=AHI17475.1] [location=95..10267]
KF955332.1_cds_AHG23102.1_1 [protein=polyprotein] [protein_id=AHG23102.1] [location=77..10249]
KF955333.1_cds_AHG23103.1_1 [protein=polyprotein] [protein_id=AHG23103.1] [location=74..10246]
KF955449.1_cds_AHG23215.1_1 [protein=polyprotein] [protein_id=AHG23215.1] [location=59..10231]
KF955451.1_cds_AHG23217.1_1 [protein=polyprotein] [protein_id=AHG23217.1] [location=59..10231]
KF955453.1_cds_AHG23218.1_1 [protein=polyprotein] [protein_id=AHG23218.1] [location=60..10232]
KF955454.1_cds_AHG23219.1_1 [protein=polyprotein] [protein_id=AHG23219.1] [location=59..10231]
KF955456.1_cds_AHG23221.1_1 [protein=polyprotein] [protein_id=AHG23221.1] [location=57..10229]
KF955457.1_cds_AHG23222.1_1 [protein=polyprotein] [protein_id=AHG23222.1] [location=57..10229]
KF955458.1_cds_AHG23223.1_1 [protein=polyprotein] [protein_id=AHG23223.1] [location=61..10233]
KF955459.1_cds_AHG23224.1_1 [protein=polyprotein] [protein_id=AHG23224.1] [location=58..10230]
KF955460.1_cds_AHG23225.1_1 [protein=polyprotein] [protein_id=AHG23225.1] [location=61..10233]
KF955461.1_cds_AHG23226.1_1 [protein=polyprotein] [protein_id=AHG23226.1] [location=74..10246]
KF955462.1_cds_AHG23227.1_1 [protein=polyprotein] [protein_id=AHG23227.1] [location=319..10491]
KF955463.1_cds_AHG23228.1_1 [protein=polyprotein] [protein_id=AHG23228.1] [location=74..10246]
KF955464.1_cds_AHG23229.1_1 [protein=polyprotein] [protein_id=AHG23229.1] [location=74..10246]
KF955465.1_cds_AHG23230.1_1 [protein=polyprotein] [protein_id=AHG23230.1] [location=26..10198]
KF955466.1_cds_AHG23231.1_1 [protein=polyprotein] [protein_id=AHG23231.1] [location=7..10179] [
KF955468.1_cds_AHG23233.1_1 [protein=polyprotein] [protein_id=AHG23233.1] [location=25..10197]
KF955471.1_cds_AHG23236.1_1 [protein=polyprotein] [protein_id=AHG23236.1] [location=74..10246]
KF955472.1_cds_AHG23237.1_1 [protein=polyprotein] [protein_id=AHG23237.1] [location=74..10246]
KF955473.1_cds_AHG23238.1_1 [protein=polyprotein] [protein_id=AHG23238.1] [location=74..10246]
KF955474.1_cds_AHG23239.1_1 [protein=polyprotein] [protein_id=AHG23239.1] [location=74..10246]
KF955476.1_cds_AHG23241.1_1 [protein=polyprotein] [protein_id=AHG23241.1] [location=74..10246]
KF955477.1_cds_AHG23242.1_1 [protein=polyprotein] [protein_id=AHG23242.1] [location=74..10246]
KF955479.1_cds_AHG23244.1_1 [protein=polyprotein] [protein_id=AHG23244.1] [location=74..10246]
KF955486.1_cds_AHG23251.1_1 [protein=polyprotein] [protein_id=AHG23251.1] [location=74..10246]
KF955487.1_cds_AHG23252.1_1 [protein=polyprotein] [protein_id=AHG23252.1] [location=74..10246]
KF955505.1_cds_AHG23270.1_1 [protein=polyprotein] [protein_id=AHG23270.1] [location=74..10246]
KF955507.1_cds_AHG23272.1_1 [protein=polyprotein] [protein_id=AHG23272.1] [location=74..10246]
KF921916.1_cds_AHF45689.1_1 [protein=polyprotein] [protein_id=AHF45689.1] [location=76..10248]
JF808118.1_cds_AFK83753.1_1 [protein=polyprotein] [protein_id=AFK83753.1] [location=95..10267]
JF808119.1_cds_AFK83754.1_1 [protein=polyprotein] [protein_id=AFK83754.1] [location=95..10267]
JF808120.1_cds_AFK83755.1_1 [protein=polyprotein] [protein_id=AFK83755.1] [location=95..10267]
JF808121.1_cds_AFK83756.1_1 [protein=polyprotein] [protein_id=AFK83756.1] [location=95..10267]
JF808122.1_cds_AFK83757.1_1 [protein=polyprotein] [protein_id=AFK83757.1] [location=95..10267]
JF808123.1_cds_AFK83758.1_1 [protein=polyprotein] [protein_id=AFK83758.1] [location=95..10267]
JF808124.1_cds_AFK83759.1_1 [protein=polyprotein] [protein_id=AFK83759.1] [location=95..10267]
JF808125.1_cds_AFK83760.1_1 [protein=polyprotein] [protein_id=AFK83760.1] [location=95..10267]
JF808126.1_cds_AFK83761.1_1 [protein=polyprotein] [protein_id=AFK83761.1] [location=95..10267]
JF808127.1_cds_AFK83762.1_1 [protein=polyprotein] [protein_id=AFK83762.1] [location=95..10267]
JF808128.1_cds_AFK83763.1_1 [protein=polyprotein] [protein_id=AFK83763.1] [location=95..10267]
JF808129.1_cds_AFK83764.1_1 [protein=polyprotein] [protein_id=AFK83764.1] [location=95..10267]
KF041254.1_cds_AHC72426.1_1 [protein=polyprotein] [protein_id=AHC72426.1] [location=95..10267]
KF041255.1_cds_AHC72427.1_1 [protein=polyprotein] [protein_id=AHC72427.1] [location=95..10267]
KF041256.1_cds_AHC72428.1_1 [protein=polyprotein] [protein_id=AHC72428.1] [location=95..10267]
KF041257.1_cds_AHC72429.1_1 [protein=polyprotein] [protein_id=AHC72429.1] [location=95..10267]
KF041258.1_cds_AHC72430.1_1 [protein=polyprotein] [protein_id=AHC72430.1] [location=95..10267]
KF041259.1_cds_AHC72431.1_1 [protein=polyprotein] [protein_id=AHC72431.1] [location=95..10267]
JX669489.1_cds_AGN94893.1_1 [protein=polyprotein] [protein_id=AGN94893.1] [location=95..10267]
JX669490.1_cds_AGN94894.1_1 [protein=polyprotein] [protein_id=AGN94894.1] [location=95..10267]
JX669491.1_cds_AGN94895.1_1 [protein=polyprotein] [protein_id=AGN94895.1] [location=95..10267]
JX669492.1_cds_AGN94896.1_1 [protein=polyprotein] [protein_id=AGN94896.1] [location=95..10267]
JX669493.1_cds_AGN94897.1_1 [protein=polyprotein] [protein_id=AGN94897.1] [location=95..10267]
JX669494.1_cds_AGN94898.1_1 [protein=polyprotein] [protein_id=AGN94898.1] [location=95..10267]
JX669495.1_cds_AGN94899.1_1 [protein=polyprotein] [protein_id=AGN94899.1] [location=95..10267]
JX669496.1_cds_AGN94900.1_1 [protein=polyprotein] [protein_id=AGN94900.1] [location=95..10267]
JX669497.1_cds_AGN94901.1_1 [protein=polyprotein] [protein_id=AGN94901.1] [location=95..10267]
JX669498.1_cds_AGN94902.1_1 [protein=polyprotein] [protein_id=AGN94902.1] [location=95..10267]
JX669499.1_cds_AGN94903.1_1 [protein=polyprotein] [protein_id=AGN94903.1] [location=95..10267]
JX669500.1_cds_AGN94904.1_1 [protein=polyprotein] [protein_id=AGN94904.1] [location=95..10267]
JX669501.1_cds_AGN94905.1_1 [protein=polyprotein] [protein_id=AGN94905.1] [location=95..10267]
JX669502.1_cds_AGN94906.1_1 [protein=polyprotein] [protein_id=AGN94906.1] [location=95..10267]
JX669503.1_cds_AGN94907.1_1 [protein=polyprotein] [protein_id=AGN94907.1] [location=95..10267]
JX669504.1_cds_AGN94908.1_1 [protein=polyprotein] [protein_id=AGN94908.1] [location=95..10267]
JX669505.1_cds_AGN94909.1_1 [protein=polyprotein] [protein_id=AGN94909.1] [location=95..10267]
JX669506.1_cds_AGN94910.1_1 [protein=polyprotein] [protein_id=AGN94910.1] [location=95..10267]
JX669507.1_cds_AGN94911.1_1 [protein=polyprotein] [protein_id=AGN94911.1] [location=95..10267]
JX669508.1_cds_AGN94912.1_1 [protein=polyprotein] [protein_id=AGN94912.1] [location=95..10267]
JQ922554.1_cds_AFZ40124.1_1 [protein=polyprotein] [protein_id=AFZ40124.1] [location=93..10265]
JQ922555.1_cds_AFZ40125.1_1 [protein=polyprotein] [protein_id=AFZ40125.1] [location=59..10231]
JQ922556.1_cds_AFZ40126.1_1 [protein=polyprotein] [protein_id=AFZ40126.1] [location=74..10246]
JQ922557.1_cds_AFZ40127.1_1 [protein=polyprotein] [protein_id=AFZ40127.1] [location=59..10231]
KC425219.1_cds_AGH08164.1_1 [protein=polyprotein] [protein_id=AGH08164.1] [location=95..10267]
KC261634.1_cds_AGC60098.1_1 [protein=polyprotein] [protein_id=AGC60098.1] [location=70..10242]
JN406514.1_cds_AFN80338.1_1 [protein=polyprotein] [protein_id=AFN80338.1] [location=95..10267]
JN406515.1_cds_AFN80339.1_1 [protein=polyprotein] [protein_id=AFN80339.1] [location=95..10267]
JN368477.1_cds_AFM82486.1_1 [protein=polyprotein] [protein_id=AFM82486.1] [location=80..10252]
JQ411814.1_cds_AFI55000.1_1 [protein=polyprotein] [protein_id=AFI55000.1] [location=95..10267]
HQ332170.1_cds_AEA50923.1_1 [protein=polyprotein] [protein_id=AEA50923.1] [location=95..10267]
HQ332171.1_cds_AEA50924.1_1 [protein=polyprotein] [protein_id=AEA50924.1] [location=95..10267]
JQ045687.1_cds_AFD28531.1_1 [protein=polyprotein] [protein_id=AFD28531.1] [location=74..10246]
JQ045688.1_cds_AFD28532.1_1 [protein=polyprotein] [protein_id=AFD28532.1] [location=74..10246]
JQ045689.1_cds_AFD28533.1_1 [protein=polyprotein] [protein_id=AFD28533.1] [location=74..10246]
JQ045690.1_cds_AFD28534.1_1 [protein=polyprotein] [protein_id=AFD28534.1] [location=74..10246]
JQ045691.1_cds_AFD28535.1_1 [protein=polyprotein] [protein_id=AFD28535.1] [location=74..10246]
JQ045692.1_cds_AFD28536.1_1 [protein=polyprotein] [protein_id=AFD28536.1] [location=74..10246]
JQ045693.1_cds_AFD28537.1_1 [protein=polyprotein] [protein_id=AFD28537.1] [location=74..10246]
JQ045694.1_cds_AFD28538.1_1 [protein=polyprotein] [protein_id=AFD28538.1] [location=74..10246]
JQ045695.1_cds_AFD28539.1_1 [protein=polyprotein] [protein_id=AFD28539.1] [location=74..10246]
JN662391.1_cds_AEZ01357.1_1 [protein=polyprotein] [protein_id=AEZ01357.1] [location=95..10267]
JN697379.1_cds_AEV42062.1_1 [protein=polyprotein] [protein_id=AEV42062.1] [location=95..10267]
JN183884.1_cds_AEK64468.1_1 [protein=polyprotein] [protein_id=AEK64468.1] [location=80..10252]
JN093513.1_cds_AEH59349.1_1 [protein=polyprotein] [protein_id=AEH59349.1] [location=79..10251]
JN093514.1_cds_AEH59350.1_1 [protein=polyprotein] [protein_id=AEH59350.1] [location=92..10264]
JN093515.1_cds_AEH59351.1_1 [protein=polyprotein] [protein_id=AEH59351.1] [location=78..10250]
JN093517.1_cds_AEH59353.1_1 [protein=polyprotein] [protein_id=AEH59353.1] [location=81..10253]
JF504679.1_cds_AEG89542.1_1 [protein=polyprotein] [protein_id=AEG89542.1] [location=95..10267]
HQ235027.1_cds_AEF65939.1_1 [protein=polyprotein] [protein_id=AEF65939.1] [location=95..10267]
JN000936.1_cds_AEF57556.1_1 [protein=polyprotein] [protein_id=AEF57556.1] [location=80..10252]
JN000937.1_cds_AEF57557.1_1 [protein=polyprotein] [protein_id=AEF57557.1] [location=80..10252]
JN000938.1_cds_AEF57558.1_1 [protein=polyprotein] [protein_id=AEF57558.1] [location=80..10252]
JF937620.1_cds_AEF01523.1_1 [protein=polyprotein] [protein_id=AEF01523.1] [location=80..10252]
JF937621.1_cds_AEF01524.1_1 [protein=polyprotein] [protein_id=AEF01524.1] [location=80..10252]
JF937622.1_cds_AEF01525.1_1 [protein=polyprotein] [protein_id=AEF01525.1] [location=79..10251]
JF937623.1_cds_AEF01526.1_1 [protein=polyprotein] [protein_id=AEF01526.1] [location=79..10251]
JF937624.1_cds_AEF01527.1_1 [protein=polyprotein] [protein_id=AEF01527.1] [location=79..10251]
JF937625.1_cds_AEF01528.1_1 [protein=polyprotein] [protein_id=AEF01528.1] [location=79..10251]
JF937626.1_cds_AEF01529.1_1 [protein=polyprotein] [protein_id=AEF01529.1] [location=89..10261]
JF937627.1_cds_AEF01530.1_1 [protein=polyprotein] [protein_id=AEF01530.1] [location=79..10251]
JF937628.1_cds_AEF01531.1_1 [protein=polyprotein] [protein_id=AEF01531.1] [location=83..10255]
JF937629.1_cds_AEF01532.1_1 [protein=polyprotein] [protein_id=AEF01532.1] [location=80..10252]
JF937630.1_cds_AEF01533.1_1 [protein=polyprotein] [protein_id=AEF01533.1] [location=80..10252]
JF937631.1_cds_AEF01534.1_1 [protein=polyprotein] [protein_id=AEF01534.1] [location=124..10296]
JF937632.1_cds_AEF01535.1_1 [protein=polyprotein] [protein_id=AEF01535.1] [location=95..10267]
JF937633.1_cds_AEF01536.1_1 [protein=polyprotein] [protein_id=AEF01536.1] [location=78..10250]
JF937634.1_cds_AEF01537.1_1 [protein=polyprotein] [protein_id=AEF01537.1] [location=80..10252]
JF937636.1_cds_AEF01539.1_1 [protein=polyprotein] [protein_id=AEF01539.1] [location=80..10252]
JF937637.1_cds_AEF01540.1_1 [protein=polyprotein] [protein_id=AEF01540.1] [location=88..10260]
JF937638.1_cds_AEF01541.1_1 [protein=polyprotein] [protein_id=AEF01541.1] [location=80..10252]
JF937639.1_cds_AEF01542.1_1 [protein=polyprotein] [protein_id=AEF01542.1] [location=43..10215]
JF937640.1_cds_AEF01543.1_1 [protein=polyprotein] [protein_id=AEF01543.1] [location=80..10252]
JF937641.1_cds_AEF01544.1_1 [protein=polyprotein] [protein_id=AEF01544.1] [location=80..10252]
JF937642.1_cds_AEF01545.1_1 [protein=polyprotein] [protein_id=AEF01545.1] [location=80..10252]
JF937643.1_cds_AEF01546.1_1 [protein=polyprotein] [protein_id=AEF01546.1] [location=80..10252]
JF937646.1_cds_AEF01549.1_1 [protein=polyprotein] [protein_id=AEF01549.1] [location=80..10252]
JF937647.1_cds_AEF01550.1_1 [protein=polyprotein] [protein_id=AEF01550.1] [location=79..10251]
JF937648.1_cds_AEF01551.1_1 [protein=polyprotein] [protein_id=AEF01551.1] [location=79..10251]
JF937652.1_cds_AEF01555.1_1 [protein=polyprotein] [protein_id=AEF01555.1] [location=19..10191]
JF920393.1_cds_AEE99021.1_1 [protein=polyprotein] [protein_id=AEE99021.1] [location=80..10252]
JF920394.1_cds_AEE99022.1_1 [protein=polyprotein] [protein_id=AEE99022.1] [location=81..10253]
JF920395.1_cds_AEE99023.1_1 [protein=polyprotein] [protein_id=AEE99023.1] [location=80..10252]
JF920396.1_cds_AEE99024.1_1 [protein=polyprotein] [protein_id=AEE99024.1] [location=74..10246]
JF920397.1_cds_AEE99025.1_1 [protein=polyprotein] [protein_id=AEE99025.1] [location=76..10248]
JF920398.1_cds_AEE99026.1_1 [protein=polyprotein] [protein_id=AEE99026.1] [location=79..10251]
JF920399.1_cds_AEE99027.1_1 [protein=polyprotein] [protein_id=AEE99027.1] [location=80..10252]
JF920400.1_cds_AEE99028.1_1 [protein=polyprotein] [protein_id=AEE99028.1] [location=80..10252]
JF920401.1_cds_AEE99029.1_1 [protein=polyprotein] [protein_id=AEE99029.1] [location=80..10252]
JF920402.1_cds_AEE99030.1_1 [protein=polyprotein] [protein_id=AEE99030.1] [location=80..10252]
JF920403.1_cds_AEE99031.1_1 [protein=polyprotein] [protein_id=AEE99031.1] [location=80..10252]
JF920404.1_cds_AEE99032.1_1 [protein=polyprotein] [protein_id=AEE99032.1] [location=80..10252]
JF920405.1_cds_AEE99033.1_1 [protein=polyprotein] [protein_id=AEE99033.1] [location=80..10252]
JF920406.1_cds_AEE99034.1_1 [protein=polyprotein] [protein_id=AEE99034.1] [location=80..10252]
JF920407.1_cds_AEE99035.1_1 [protein=polyprotein] [protein_id=AEE99035.1] [location=79..10251]
JF920408.1_cds_AEE99036.1_1 [protein=polyprotein] [protein_id=AEE99036.1] [location=80..10252]
JF920409.1_cds_AEE99037.1_1 [protein=polyprotein] [protein_id=AEE99037.1] [location=79..10251]
GQ466079.1_cds_ADM63678.1_1 [protein=polyprotein] [protein_id=ADM63678.1] [location=95..10267]
HQ891025.1_cds_ADZ13189.1_1 [protein=polyprotein] [protein_id=ADZ13189.1] [location=80..10252]
JF295012.1_cds_ADZ13190.1_1 [protein=polyprotein] [protein_id=ADZ13190.1] [location=74..10246]
HQ541785.1_cds_ADU76195.1_1 [protein=polyprotein] [protein_id=ADU76195.1] [location=80..10252]
HQ541789.1_cds_ADU76199.1_1 [protein=polyprotein] [protein_id=ADU76199.1] [location=79..10251]
HQ541790.1_cds_ADU76200.1_1 [protein=polyprotein] [protein_id=ADU76200.1] [location=93..10265]
HQ541791.1_cds_ADU76201.1_1 [protein=polyprotein] [protein_id=ADU76201.1] [location=89..10261]
HQ541795.1_cds_ADU76205.1_1 [protein=polyprotein] [protein_id=ADU76205.1] [location=80..10252]
HQ541796.1_cds_ADU76206.1_1 [protein=polyprotein] [protein_id=ADU76206.1] [location=80..10252]
HQ541797.1_cds_ADU76207.1_1 [protein=polyprotein] [protein_id=ADU76207.1] [location=81..10253]
HQ541806.1_cds_ADU76213.1_1 [protein=polyprotein] [protein_id=ADU76213.1] [location=124..10296]
HQ671176.1_cds_ADU76215.1_1 [protein=polyprotein] [protein_id=ADU76215.1] [location=80..10252]
HQ671177.1_cds_ADU76216.1_1 [protein=polyprotein] [protein_id=ADU76216.1] [location=80..10252]
HQ671178.1_cds_ADU76217.1_1 [protein=polyprotein] [protein_id=ADU76217.1] [location=124..10296]
HQ705609.1_cds_ADU76218.1_1 [protein=polyprotein] [protein_id=ADU76218.1] [location=80..10252]
HQ705610.1_cds_ADU76219.1_1 [protein=polyprotein] [protein_id=ADU76219.1] [location=80..10252]
HQ705611.1_cds_ADU76220.1_1 [protein=polyprotein] [protein_id=ADU76220.1] [location=84..10256]
HQ705612.1_cds_ADU76221.1_1 [protein=polyprotein] [protein_id=ADU76221.1] [location=80..10252]
HQ705613.1_cds_ADU76222.1_1 [protein=polyprotein] [protein_id=ADU76222.1] [location=80..10252]
HQ705614.1_cds_ADU76223.1_1 [protein=polyprotein] [protein_id=ADU76223.1] [location=80..10252]
HQ705615.1_cds_ADU76224.1_1 [protein=polyprotein] [protein_id=ADU76224.1] [location=86..10258]
HQ705616.1_cds_ADU76225.1_1 [protein=polyprotein] [protein_id=ADU76225.1] [location=81..10253]
HQ705617.1_cds_ADU76226.1_1 [protein=polyprotein] [protein_id=ADU76226.1] [location=81..10253]
HQ705618.1_cds_ADU76227.1_1 [protein=polyprotein] [protein_id=ADU76227.1] [location=79..10251]
HQ705619.1_cds_ADU76228.1_1 [protein=polyprotein] [protein_id=ADU76228.1] [location=81..10253]
HQ705620.1_cds_ADU76229.1_1 [protein=polyprotein] [protein_id=ADU76229.1] [location=80..10252]
HQ705621.1_cds_ADU76230.1_1 [protein=polyprotein] [protein_id=ADU76230.1] [location=80..10252]
HQ705622.1_cds_ADU76231.1_1 [protein=polyprotein] [protein_id=ADU76231.1] [location=80..10252]
HQ705623.1_cds_ADU76232.1_1 [protein=polyprotein] [protein_id=ADU76232.1] [location=80..10252]
FJ644564.1_cds_ACV04798.1_1 [protein=polyprotein] [protein_id=ACV04798.1] [location=95..10267]
HQ166030.1_cds_ADO97106.1_1 [protein=polyprotein] [protein_id=ADO97106.1] [location=80..10252]
HQ166031.1_cds_ADO97107.1_1 [protein=polyprotein] [protein_id=ADO97107.1] [location=80..10252]
HQ166032.1_cds_ADO97108.1_1 [protein=polyprotein] [protein_id=ADO97108.1] [location=80..10252]
HQ166033.1_cds_ADO97109.1_1 [protein=polyprotein] [protein_id=ADO97109.1] [location=80..10252]
HQ166034.1_cds_ADO97110.1_1 [protein=polyprotein] [protein_id=ADO97110.1] [location=80..10252]
HM631856.1_cds_ADK26436.1_1 [protein=polyprotein] [protein_id=ADK26436.1] [location=78..10247]
HM631857.1_cds_ADK26420.1_1 [protein=polyprotein] [protein_id=ADK26420.1] [location=80..10252]
HM631858.1_cds_ADK26421.1_1 [protein=polyprotein] [protein_id=ADK26421.1] [location=80..10252]
HM631859.1_cds_ADK26422.1_1 [protein=polyprotein] [protein_id=ADK26422.1] [location=80..10252]
HM631860.1_cds_ADK26423.1_1 [protein=polyprotein] [protein_id=ADK26423.1] [location=79..10251]
HM631861.1_cds_ADK26424.1_1 [protein=polyprotein] [protein_id=ADK26424.1] [location=80..10252]
HM631862.1_cds_ADK26425.1_1 [protein=polyprotein] [protein_id=ADK26425.1] [location=79..10251]
HM631863.1_cds_ADK26426.1_1 [protein=polyprotein] [protein_id=ADK26426.1] [location=81..10253]
HM631864.1_cds_ADK26427.1_1 [protein=polyprotein] [protein_id=ADK26427.1] [location=80..10252]
HM631869.1_cds_ADK26432.1_1 [protein=polyprotein] [protein_id=ADK26432.1] [location=80..10252]
HM756274.1_cds_ADK26438.1_1 [protein=polyprotein] [protein_id=ADK26438.1] [location=80..10252]
HM756275.1_cds_ADK26439.1_1 [protein=polyprotein] [protein_id=ADK26439.1] [location=80..10252]
HM756276.1_cds_ADK26440.1_1 [protein=polyprotein] [protein_id=ADK26440.1] [location=80..10252]
HM756277.1_cds_ADK26441.1_1 [protein=polyprotein] [protein_id=ADK26441.1] [location=81..10253]
HM756278.1_cds_ADK26442.1_1 [protein=polyprotein] [protein_id=ADK26442.1] [location=81..10253]
HM756279.1_cds_ADK26443.1_1 [protein=polyprotein] [protein_id=ADK26443.1] [location=81..10253]
HM756280.1_cds_ADK26444.1_1 [protein=polyprotein] [protein_id=ADK26444.1] [location=81..10253]
HM756281.1_cds_ADK26445.1_1 [protein=polyprotein] [protein_id=ADK26445.1] [location=81..10253]
HM756282.1_cds_ADK26446.1_1 [protein=polyprotein] [protein_id=ADK26446.1] [location=80..10252]
HM181933.1_cds_ADI80617.1_1 [protein=polyprotein] [protein_id=ADI80617.1] [location=74..10246]
HM181934.1_cds_ADI80618.1_1 [protein=polyprotein] [protein_id=ADI80618.1] [location=74..10246]
HM181935.1_cds_ADI80619.1_1 [protein=polyprotein] [protein_id=ADI80619.1] [location=74..10246]
HM181972.1_cds_ADI80656.1_1 [protein=polyprotein] [protein_id=ADI80656.1] [location=80..10252]
HM181973.1_cds_ADI80657.1_1 [protein=polyprotein] [protein_id=ADI80657.1] [location=80..10252]
HM181974.1_cds_ADI80658.1_1 [protein=polyprotein] [protein_id=ADI80658.1] [location=80..10252]
HM181975.1_cds_ADI80659.1_1 [protein=polyprotein] [protein_id=ADI80659.1] [location=80..10252]
HM181976.1_cds_ADI80660.1_1 [protein=polyprotein] [protein_id=ADI80660.1] [location=80..10252]
HM181977.1_cds_ADI80661.1_1 [protein=polyprotein] [protein_id=ADI80661.1] [location=80..10252]
HM181978.1_cds_ADI80662.1_1 [protein=polyprotein] [protein_id=ADI80662.1] [location=79..10251]
GU363549.1_cds_ADC35596.1_1 [protein=polyprotein] [protein_id=ADC35596.1] [location=95..10267]
GU131950.1_cds_ADA60762.1_1 [protein=polyprotein] [protein_id=ADA60762.1] [location=74..10246]
GU131951.1_cds_ADA60763.1_1 [protein=polyprotein] [protein_id=ADA60763.1] [location=74..10246]
GU131952.1_cds_ADA60764.1_1 [protein=polyprotein] [protein_id=ADA60764.1] [location=74..10246]
GU131953.1_cds_ADA60765.1_1 [protein=polyprotein] [protein_id=ADA60765.1] [location=74..10246]
GU131954.1_cds_ADA60766.1_1 [protein=polyprotein] [protein_id=ADA60766.1] [location=74..10246]
GU189648.1_cds_ACZ15977.1_1 [protein=polyprotein] [protein_id=ACZ15977.1] [location=1..10173] [
GU131844.1_cds_ACY70743.1_1 [protein=polyprotein] [protein_id=ACY70743.1] [location=74..10246]
GU131845.1_cds_ACY70744.1_1 [protein=polyprotein] [protein_id=ACY70744.1] [location=74..10246]
GU131846.1_cds_ACY70745.1_1 [protein=polyprotein] [protein_id=ACY70745.1] [location=74..10246]
GU131847.1_cds_ACY70746.1_1 [protein=polyprotein] [protein_id=ACY70746.1] [location=74..10246]
GU131848.1_cds_ACY70747.1_1 [protein=polyprotein] [protein_id=ACY70747.1] [location=74..10246]
GU131849.1_cds_ACY70748.1_1 [protein=polyprotein] [protein_id=ACY70748.1] [location=74..10246]
GU131850.1_cds_ACY70749.1_1 [protein=polyprotein] [protein_id=ACY70749.1] [location=74..10246]
GU131851.1_cds_ACY70750.1_1 [protein=polyprotein] [protein_id=ACY70750.1] [location=74..10246]
GU131852.1_cds_ACY70751.1_1 [protein=polyprotein] [protein_id=ACY70751.1] [location=74..10246]
GU131853.1_cds_ACY70752.1_1 [protein=polyprotein] [protein_id=ACY70752.1] [location=74..10246]
GU131854.1_cds_ACY70753.1_1 [protein=polyprotein] [protein_id=ACY70753.1] [location=74..10246]
GU131855.1_cds_ACY70754.1_1 [protein=polyprotein] [protein_id=ACY70754.1] [location=74..10246]
GU131856.1_cds_ACY70755.1_1 [protein=polyprotein] [protein_id=ACY70755.1] [location=74..10246]
GU131857.1_cds_ACY70756.1_1 [protein=polyprotein] [protein_id=ACY70756.1] [location=74..10246]
GU131858.1_cds_ACY70757.1_1 [protein=polyprotein] [protein_id=ACY70757.1] [location=74..10246]
GU131859.1_cds_ACY70758.1_1 [protein=polyprotein] [protein_id=ACY70758.1] [location=74..10246]
GU131860.1_cds_ACY70759.1_1 [protein=polyprotein] [protein_id=ACY70759.1] [location=74..10246]
GU131861.1_cds_ACY70760.1_1 [protein=polyprotein] [protein_id=ACY70760.1] [location=74..10246]
GU131862.1_cds_ACY70761.1_1 [protein=polyprotein] [protein_id=ACY70761.1] [location=74..10246]
GU131865.1_cds_ACY70764.1_1 [protein=polyprotein] [protein_id=ACY70764.1] [location=74..10246]
GU131866.1_cds_ACY70765.1_1 [protein=polyprotein] [protein_id=ACY70765.1] [location=74..10246]
GU131867.1_cds_ACY70766.1_1 [protein=polyprotein] [protein_id=ACY70766.1] [location=74..10246]
GU131868.1_cds_ACY70767.1_1 [protein=polyprotein] [protein_id=ACY70767.1] [location=74..10246]
GU131869.1_cds_ACY70768.1_1 [protein=polyprotein] [protein_id=ACY70768.1] [location=74..10246]
GU131870.1_cds_ACY70769.1_1 [protein=polyprotein] [protein_id=ACY70769.1] [location=74..10246]
GU131871.1_cds_ACY70770.1_1 [protein=polyprotein] [protein_id=ACY70770.1] [location=59..10231]
GU131872.1_cds_ACY70771.1_1 [protein=polyprotein] [protein_id=ACY70771.1] [location=74..10246]
GU131873.1_cds_ACY70772.1_1 [protein=polyprotein] [protein_id=ACY70772.1] [location=74..10246]
GU131874.1_cds_ACY70773.1_1 [protein=polyprotein] [protein_id=ACY70773.1] [location=74..10246]
GU131875.1_cds_ACY70774.1_1 [protein=polyprotein] [protein_id=ACY70774.1] [location=74..10246]
GU131876.1_cds_ACY70775.1_1 [protein=polyprotein] [protein_id=ACY70775.1] [location=74..10246]
GU131877.1_cds_ACY70776.1_1 [protein=polyprotein] [protein_id=ACY70776.1] [location=74..10246]
GU131878.1_cds_ACY70777.1_1 [protein=polyprotein] [protein_id=ACY70777.1] [location=74..10246]
GU131903.1_cds_ACY70802.1_1 [protein=polyprotein] [protein_id=ACY70802.1] [location=74..10246]
GU131904.1_cds_ACY70803.1_1 [protein=polyprotein] [protein_id=ACY70803.1] [location=74..10246]
GU131905.1_cds_ACY70804.1_1 [protein=polyprotein] [protein_id=ACY70804.1] [location=74..10246]
GU131906.1_cds_ACY70805.1_1 [protein=polyprotein] [protein_id=ACY70805.1] [location=74..10246]
GU131907.1_cds_ACY70806.1_1 [protein=polyprotein] [protein_id=ACY70806.1] [location=74..10246]
GU131908.1_cds_ACY70807.1_1 [protein=polyprotein] [protein_id=ACY70807.1] [location=74..10246]
GU131909.1_cds_ACY70808.1_1 [protein=polyprotein] [protein_id=ACY70808.1] [location=74..10246]
GU131910.1_cds_ACY70809.1_1 [protein=polyprotein] [protein_id=ACY70809.1] [location=59..10231]
GU131911.1_cds_ACY70810.1_1 [protein=polyprotein] [protein_id=ACY70810.1] [location=74..10246]
GU131912.1_cds_ACY70811.1_1 [protein=polyprotein] [protein_id=ACY70811.1] [location=74..10246]
GU131913.1_cds_ACY70812.1_1 [protein=polyprotein] [protein_id=ACY70812.1] [location=74..10246]
GU131914.1_cds_ACY70813.1_1 [protein=polyprotein] [protein_id=ACY70813.1] [location=74..10246]
GU131915.1_cds_ACY70814.1_1 [protein=polyprotein] [protein_id=ACY70814.1] [location=74..10246]
GU131916.1_cds_ACY70815.1_1 [protein=polyprotein] [protein_id=ACY70815.1] [location=74..10246]
GU131917.1_cds_ACY70816.1_1 [protein=polyprotein] [protein_id=ACY70816.1] [location=74..10246]
GU131918.1_cds_ACY70817.1_1 [protein=polyprotein] [protein_id=ACY70817.1] [location=74..10246]
GU131933.1_cds_ACY70832.1_1 [protein=polyprotein] [protein_id=ACY70832.1] [location=74..10246]
GU131934.1_cds_ACY70833.1_1 [protein=polyprotein] [protein_id=ACY70833.1] [location=74..10246]
GU131935.1_cds_ACY70834.1_1 [protein=polyprotein] [protein_id=ACY70834.1] [location=74..10246]
GU131936.1_cds_ACY70835.1_1 [protein=polyprotein] [protein_id=ACY70835.1] [location=74..10246]
GU131937.1_cds_ACY70836.1_1 [protein=polyprotein] [protein_id=ACY70836.1] [location=74..10246]
GU131938.1_cds_ACY70837.1_1 [protein=polyprotein] [protein_id=ACY70837.1] [location=74..10246]
GU131939.1_cds_ACY70838.1_1 [protein=polyprotein] [protein_id=ACY70838.1] [location=74..10246]
GU131940.1_cds_ACY70839.1_1 [protein=polyprotein] [protein_id=ACY70839.1] [location=74..10246]
GU131941.1_cds_ACY70840.1_1 [protein=polyprotein] [protein_id=ACY70840.1] [location=74..10246]
GU131942.1_cds_ACY70841.1_1 [protein=polyprotein] [protein_id=ACY70841.1] [location=74..10246]
GU131943.1_cds_ACY70842.1_1 [protein=polyprotein] [protein_id=ACY70842.1] [location=74..10246]
GU131944.1_cds_ACY70843.1_1 [protein=polyprotein] [protein_id=ACY70843.1] [location=74..10246]
GU131945.1_cds_ACY70844.1_1 [protein=polyprotein] [protein_id=ACY70844.1] [location=74..10246]
GU131946.1_cds_ACY70845.1_1 [protein=polyprotein] [protein_id=ACY70845.1] [location=74..10246]
EU932687.1_cds_ACW82862.1_1 [protein=polyprotein] [protein_id=ACW82862.1] [location=83..10255]
EU932688.1_cds_ACW82863.1_1 [protein=polyprotein] [protein_id=ACW82863.1] [location=59..10231]
GQ868546.1_cds_ACW82870.1_1 [protein=polyprotein] [protein_id=ACW82870.1] [location=74..10246]
GQ868547.1_cds_ACW82871.1_1 [protein=polyprotein] [protein_id=ACW82871.1] [location=74..10246]
GQ868548.1_cds_ACW82872.1_1 [protein=polyprotein] [protein_id=ACW82872.1] [location=74..10246]
GQ868571.1_cds_ACW82999.1_1 [protein=polyprotein] [protein_id=ACW82999.1] [location=74..10246]
GQ868572.1_cds_ACW83000.1_1 [protein=polyprotein] [protein_id=ACW83000.1] [location=74..10246]
GQ868573.1_cds_ACW83001.1_1 [protein=polyprotein] [protein_id=ACW83001.1] [location=74..10246]
GQ868574.1_cds_ACW83002.1_1 [protein=polyprotein] [protein_id=ACW83002.1] [location=74..10246]
GQ868575.1_cds_ACW83003.1_1 [protein=polyprotein] [protein_id=ACW83003.1] [location=74..10246]
GQ868576.1_cds_ACW83004.1_1 [protein=polyprotein] [protein_id=ACW83004.1] [location=74..10246]
GQ868577.1_cds_ACW83005.1_1 [protein=polyprotein] [protein_id=ACW83005.1] [location=74..10246]
GQ868578.1_cds_ACW83006.1_1 [protein=polyprotein] [protein_id=ACW83006.1] [location=74..10246]
GQ868586.1_cds_ACW82876.1_1 [protein=polyprotein] [protein_id=ACW82876.1] [location=74..10246]
GQ868587.1_cds_ACW82877.1_1 [protein=polyprotein] [protein_id=ACW82877.1] [location=74..10246]
GQ868593.1_cds_ACW82883.1_1 [protein=polyprotein] [protein_id=ACW82883.1] [location=74..10246]
GQ868616.1_cds_ACW82935.1_1 [protein=polyprotein] [protein_id=ACW82935.1] [location=74..10246]
GQ868617.1_cds_ACW82936.1_1 [protein=polyprotein] [protein_id=ACW82936.1] [location=74..10246]
GQ868626.1_cds_ACW82914.1_1 [protein=polyprotein] [protein_id=ACW82914.1] [location=74..10246]
GQ868627.1_cds_ACW82915.1_1 [protein=polyprotein] [protein_id=ACW82915.1] [location=74..10246]
GQ868628.1_cds_ACW82916.1_1 [protein=polyprotein] [protein_id=ACW82916.1] [location=70..10242]
GQ868629.1_cds_ACW82917.1_1 [protein=polyprotein] [protein_id=ACW82917.1] [location=71..10243]
GQ868634.1_cds_ACW82922.1_1 [protein=polyprotein] [protein_id=ACW82922.1] [location=74..10246]
DQ863638.1_cds_AAB69126.2_1 [protein=polyprotein] [protein_id=AAB69126.2] [location=95..10267]
GQ199860.1_cds_ACS31994.1_1 [protein=polyprotein] [protein_id=ACS31994.1] [location=74..10246]
GQ199861.1_cds_ACS31995.1_1 [protein=polyprotein] [protein_id=ACS31995.1] [location=74..10246]
GQ199862.1_cds_ACS31996.1_1 [protein=polyprotein] [protein_id=ACS31996.1] [location=74..10246]
GQ199863.1_cds_ACS31997.1_1 [protein=polyprotein] [protein_id=ACS31997.1] [location=74..10246]
GQ199864.1_cds_ACS31998.1_1 [protein=polyprotein] [protein_id=ACS31998.1] [location=74..10246]
GQ199865.1_cds_ACS31999.1_1 [protein=polyprotein] [protein_id=ACS31999.1] [location=74..10246]
GQ199870.1_cds_ACS32004.1_1 [protein=polyprotein] [protein_id=ACS32004.1] [location=74..10246]
GQ199871.1_cds_ACS32005.1_1 [protein=polyprotein] [protein_id=ACS32005.1] [location=59..10231]
GQ199886.1_cds_ACS32027.1_1 [protein=polyprotein] [protein_id=ACS32027.1] [location=74..10246]
GQ199887.1_cds_ACS32028.1_1 [protein=polyprotein] [protein_id=ACS32028.1] [location=74..10246]
GQ199888.1_cds_ACS32029.1_1 [protein=polyprotein] [protein_id=ACS32029.1] [location=74..10246]
GQ199889.1_cds_ACS32030.1_1 [protein=polyprotein] [protein_id=ACS32030.1] [location=74..10246]
GQ199891.1_cds_ACS32032.1_1 [protein=polyprotein] [protein_id=ACS32032.1] [location=74..10246]
GQ252674.1_cds_ACS32036.1_1 [protein=polyprotein] [protein_id=ACS32036.1] [location=74..10246]
GQ252678.1_cds_ACS32040.1_1 [protein=polyprotein] [protein_id=ACS32040.1] [location=74..10246]
FJ873812.1_cds_ACQ44321.1_1 [protein=polyprotein] [protein_id=ACQ44321.1] [location=74..10246]
FJ873813.1_cds_ACQ44322.1_1 [protein=polyprotein] [protein_id=ACQ44322.1] [location=59..10231]
FJ882571.1_cds_ACQ44380.1_1 [protein=polyprotein] [protein_id=ACQ44380.1] [location=74..10246]
FJ882572.1_cds_ACQ44381.1_1 [protein=polyprotein] [protein_id=ACQ44381.1] [location=74..10246]
FJ882573.1_cds_ACQ44382.1_1 [protein=polyprotein] [protein_id=ACQ44382.1] [location=74..10246]
FJ882574.1_cds_ACQ44383.1_1 [protein=polyprotein] [protein_id=ACQ44383.1] [location=62..10234]
FJ882575.1_cds_ACQ44384.1_1 [protein=polyprotein] [protein_id=ACQ44384.1] [location=74..10246]
FJ882576.1_cds_ACQ44385.1_1 [protein=polyprotein] [protein_id=ACQ44385.1] [location=74..10246]
FJ882577.1_cds_ACQ44386.1_1 [protein=polyprotein] [protein_id=ACQ44386.1] [location=74..10246]
FJ882578.1_cds_ACQ44387.1_1 [protein=polyprotein] [protein_id=ACQ44387.1] [location=74..10246]
FJ898440.1_cds_ACQ44479.1_1 [protein=polyprotein] [protein_id=ACQ44479.1] [location=74..10246]
FJ898441.1_cds_ACQ44480.1_1 [protein=polyprotein] [protein_id=ACQ44480.1] [location=74..10246]
FJ898442.1_cds_ACQ44481.1_1 [protein=polyprotein] [protein_id=ACQ44481.1] [location=74..10246]
FJ898443.1_cds_ACQ44482.1_1 [protein=polyprotein] [protein_id=ACQ44482.1] [location=74..10246]
FJ898444.1_cds_ACQ44483.1_1 [protein=polyprotein] [protein_id=ACQ44483.1] [location=74..10246]
FJ898445.1_cds_ACQ44484.1_1 [protein=polyprotein] [protein_id=ACQ44484.1] [location=74..10246]
FJ898446.1_cds_ACQ44485.1_1 [protein=polyprotein] [protein_id=ACQ44485.1] [location=74..10246]
FJ898447.1_cds_ACQ44486.1_1 [protein=polyprotein] [protein_id=ACQ44486.1] [location=74..10246]
FJ898455.1_cds_ACQ44494.1_1 [protein=polyprotein] [protein_id=ACQ44494.1] [location=74..10246]
FJ898456.1_cds_ACQ44495.1_1 [protein=polyprotein] [protein_id=ACQ44495.1] [location=74..10246]
FJ898457.1_cds_ACQ44496.1_1 [protein=polyprotein] [protein_id=ACQ44496.1] [location=74..10246]
FJ898458.1_cds_ACQ44497.1_1 [protein=polyprotein] [protein_id=ACQ44497.1] [location=74..10246]
FJ898459.1_cds_ACQ44498.1_1 [protein=polyprotein] [protein_id=ACQ44498.1] [location=74..10246]
FJ898462.1_cds_ACQ44501.1_1 [protein=polyprotein] [protein_id=ACQ44501.1] [location=74..10246]
FJ898463.1_cds_ACQ44502.1_1 [protein=polyprotein] [protein_id=ACQ44502.1] [location=74..10246]
FJ898464.1_cds_ACQ44503.1_1 [protein=polyprotein] [protein_id=ACQ44503.1] [location=74..10246]
FJ898468.1_cds_ACQ44507.1_1 [protein=polyprotein] [protein_id=ACQ44507.1] [location=74..10246]
FJ898469.1_cds_ACQ44508.1_1 [protein=polyprotein] [protein_id=ACQ44508.1] [location=74..10246]
FJ898470.1_cds_ACQ44509.1_1 [protein=polyprotein] [protein_id=ACQ44509.1] [location=74..10246]
FJ898471.1_cds_ACQ44510.1_1 [protein=polyprotein] [protein_id=ACQ44510.1] [location=74..10246]
FJ898472.1_cds_ACQ44511.1_1 [protein=polyprotein] [protein_id=ACQ44511.1] [location=74..10246]
FJ898473.1_cds_ACQ44512.1_1 [protein=polyprotein] [protein_id=ACQ44512.1] [location=74..10246]
FJ898474.1_cds_ACQ44513.1_1 [protein=polyprotein] [protein_id=ACQ44513.1] [location=74..10246]
FJ898475.1_cds_ACQ44529.1_1 [protein=polyprotein] [protein_id=ACQ44529.1] [location=74..10246]
FJ898476.1_cds_ACQ44530.1_1 [protein=polyprotein] [protein_id=ACQ44530.1] [location=74..10246]
FJ810413.1_cds_ACO06136.1_1 [protein=polyprotein] [protein_id=ACO06136.1] [location=74..10246]
FJ810414.1_cds_ACO06137.1_1 [protein=polyprotein] [protein_id=ACO06137.1] [location=74..10246]
FJ810416.1_cds_ACO06139.1_1 [protein=polyprotein] [protein_id=ACO06139.1] [location=74..10246]
FJ850048.1_cds_ACO06184.1_1 [protein=polyprotein] [protein_id=ACO06184.1] [location=74..10246]
FJ850049.1_cds_ACO06185.1_1 [protein=polyprotein] [protein_id=ACO06185.1] [location=74..10246]
FJ850052.1_cds_ACO06188.1_1 [protein=polyprotein] [protein_id=ACO06188.1] [location=74..10246]
FJ850055.1_cds_ACO06143.1_1 [protein=polyprotein] [protein_id=ACO06143.1] [location=59..10231]
FJ850056.1_cds_ACO06144.1_1 [protein=polyprotein] [protein_id=ACO06144.1] [location=59..10231]
FJ850079.1_cds_ACO06159.1_1 [protein=polyprotein] [protein_id=ACO06159.1] [location=74..10246]
FJ850080.1_cds_ACO06160.1_1 [protein=polyprotein] [protein_id=ACO06160.1] [location=74..10246]
FJ850083.1_cds_ACO06163.1_1 [protein=polyprotein] [protein_id=ACO06163.1] [location=74..10246]
FJ850086.1_cds_ACO06166.1_1 [protein=polyprotein] [protein_id=ACO06166.1] [location=74..10246]
FJ850089.1_cds_ACO06169.1_1 [protein=polyprotein] [protein_id=ACO06169.1] [location=74..10246]
FJ850092.1_cds_ACO06172.1_1 [protein=polyprotein] [protein_id=ACO06172.1] [location=74..10246]
FJ850094.1_cds_ACO06174.1_1 [protein=polyprotein] [protein_id=ACO06174.1] [location=74..10246]
FJ850096.1_cds_ACO06200.1_1 [protein=polyprotein] [protein_id=ACO06200.1] [location=59..10231]
FJ850097.1_cds_ACO06201.1_1 [protein=polyprotein] [protein_id=ACO06201.1] [location=74..10246]
FJ850098.1_cds_ACO06202.1_1 [protein=polyprotein] [protein_id=ACO06202.1] [location=74..10246]
FJ850109.1_cds_ACO06213.1_1 [protein=polyprotein] [protein_id=ACO06213.1] [location=74..10246]
FJ850110.1_cds_ACO06214.1_1 [protein=polyprotein] [protein_id=ACO06214.1] [location=74..10246]
FJ850111.1_cds_ACO06215.1_1 [protein=polyprotein] [protein_id=ACO06215.1] [location=74..10246]
FJ687448.1_cds_ACN42695.1_1 [protein=polyprotein] [protein_id=ACN42695.1] [location=61..10233]
FJ744700.1_cds_ACN42696.1_1 [protein=polyprotein] [protein_id=ACN42696.1] [location=59..10231]
FJ744726.1_cds_ACN42716.1_1 [protein=polyprotein] [protein_id=ACN42716.1] [location=59..10231]
FJ744727.1_cds_ACN42717.1_1 [protein=polyprotein] [protein_id=ACN42717.1] [location=74..10246]
FJ744728.1_cds_ACN42718.1_1 [protein=polyprotein] [protein_id=ACN42718.1] [location=74..10246]
FJ744729.1_cds_ACN42719.1_1 [protein=polyprotein] [protein_id=ACN42719.1] [location=74..10246]
FJ744730.1_cds_ACN42720.1_1 [protein=polyprotein] [protein_id=ACN42720.1] [location=74..10246]
FJ744731.1_cds_ACN42721.1_1 [protein=polyprotein] [protein_id=ACN42721.1] [location=74..10246]
FJ744732.1_cds_ACN42722.1_1 [protein=polyprotein] [protein_id=ACN42722.1] [location=74..10246]
FJ744733.1_cds_ACN42723.1_1 [protein=polyprotein] [protein_id=ACN42723.1] [location=74..10246]
FJ744734.1_cds_ACN42724.1_1 [protein=polyprotein] [protein_id=ACN42724.1] [location=74..10246]
FJ744735.1_cds_ACN42725.1_1 [protein=polyprotein] [protein_id=ACN42725.1] [location=74..10246]
FJ744736.1_cds_ACN42726.1_1 [protein=polyprotein] [protein_id=ACN42726.1] [location=74..10246]
FJ744737.1_cds_ACN42727.1_1 [protein=polyprotein] [protein_id=ACN42727.1] [location=74..10246]
FJ744738.1_cds_ACN42728.1_1 [protein=polyprotein] [protein_id=ACN42728.1] [location=74..10246]
FJ744739.1_cds_ACN42729.1_1 [protein=polyprotein] [protein_id=ACN42729.1] [location=59..10231]
FJ744740.1_cds_ACN42730.1_1 [protein=polyprotein] [protein_id=ACN42730.1] [location=59..10231]
FJ432722.1_cds_ACL99125.1_1 [protein=polyprotein] [protein_id=ACL99125.1] [location=59..10231]
FJ432728.1_cds_ACL99130.1_1 [protein=polyprotein] [protein_id=ACL99130.1] [location=59..10231]
FJ432731.1_cds_ACL99133.1_1 [protein=polyprotein] [protein_id=ACL99133.1] [location=59..10231]
FJ432741.1_cds_ACL99143.1_1 [protein=polyprotein] [protein_id=ACL99143.1] [location=59..10231]
FJ432743.1_cds_ACL99145.1_1 [protein=polyprotein] [protein_id=ACL99145.1] [location=59..10231]
FJ461322.1_cds_ACL99168.1_1 [protein=polyprotein] [protein_id=ACL99168.1] [location=59..10231]
FJ461326.1_cds_ACL99172.1_1 [protein=polyprotein] [protein_id=ACL99172.1] [location=59..10231]
FJ461329.1_cds_ACL99174.1_1 [protein=polyprotein] [protein_id=ACL99174.1] [location=59..10231]
FJ461334.1_cds_ACL99179.1_1 [protein=polyprotein] [protein_id=ACL99179.1] [location=60..10232]
FJ461337.1_cds_ACL99182.1_1 [protein=polyprotein] [protein_id=ACL99182.1] [location=59..10231]
FJ461338.1_cds_ACL99183.1_1 [protein=polyprotein] [protein_id=ACL99183.1] [location=59..10231]
FJ547061.1_cds_ACL98978.1_1 [protein=polyprotein] [protein_id=ACL98978.1] [location=59..10231]
FJ547062.1_cds_ACL98979.1_1 [protein=polyprotein] [protein_id=ACL98979.1] [location=59..10231]
FJ547066.1_cds_ACL98983.1_1 [protein=polyprotein] [protein_id=ACL98983.1] [location=58..10230]
FJ547069.1_cds_ACL98985.1_1 [protein=polyprotein] [protein_id=ACL98985.1] [location=59..10231]
FJ547070.1_cds_ACL98986.1_1 [protein=polyprotein] [protein_id=ACL98986.1] [location=59..10231]
FJ547071.1_cds_ACL98987.1_1 [protein=polyprotein] [protein_id=ACL98987.1] [location=59..10231]
FJ547072.1_cds_ACL98988.1_1 [protein=polyprotein] [protein_id=ACL98988.1] [location=59..10231]
FJ547073.1_cds_ACL98989.1_1 [protein=polyprotein] [protein_id=ACL98989.1] [location=59..10231]
FJ547074.1_cds_ACL98990.1_1 [protein=polyprotein] [protein_id=ACL98990.1] [location=59..10231]
FJ547075.1_cds_ACL98991.1_1 [protein=polyprotein] [protein_id=ACL98991.1] [location=59..10231]
FJ547076.1_cds_ACL98992.1_1 [protein=polyprotein] [protein_id=ACL98992.1] [location=59..10231]
FJ547077.1_cds_ACL98993.1_1 [protein=polyprotein] [protein_id=ACL98993.1] [location=59..10231]
FJ547078.1_cds_ACL98994.1_1 [protein=polyprotein] [protein_id=ACL98994.1] [location=59..10231]
FJ547079.1_cds_ACL98995.1_1 [protein=polyprotein] [protein_id=ACL98995.1] [location=59..10231]
FJ547080.1_cds_ACL98996.1_1 [protein=polyprotein] [protein_id=ACL98996.1] [location=59..10231]
FJ547081.1_cds_ACL98997.1_1 [protein=polyprotein] [protein_id=ACL98997.1] [location=59..10231]
FJ547082.1_cds_ACL98998.1_1 [protein=polyprotein] [protein_id=ACL98998.1] [location=59..10231]
FJ547083.1_cds_ACL98999.1_1 [protein=polyprotein] [protein_id=ACL98999.1] [location=60..10232]
FJ547084.1_cds_ACL99000.1_1 [protein=polyprotein] [protein_id=ACL99000.1] [location=59..10231]
FJ547085.1_cds_ACL99001.1_1 [protein=polyprotein] [protein_id=ACL99001.1] [location=59..10231]
FJ562097.1_cds_ACL99004.1_1 [protein=polyprotein] [protein_id=ACL99004.1] [location=59..10231]
FJ562099.1_cds_ACL99006.1_1 [protein=polyprotein] [protein_id=ACL99006.1] [location=62..10234]
FJ562100.1_cds_ACL99007.1_1 [protein=polyprotein] [protein_id=ACL99007.1] [location=59..10231]
FJ562102.1_cds_ACL99009.1_1 [protein=polyprotein] [protein_id=ACL99009.1] [location=59..10231]
FJ562103.1_cds_ACL99010.1_1 [protein=polyprotein] [protein_id=ACL99010.1] [location=65..10237]
FJ562107.1_cds_ACL99014.1_1 [protein=polyprotein] [protein_id=ACL99014.1] [location=59..10231]
FJ639712.1_cds_ACL99230.1_1 [protein=polyprotein] [protein_id=ACL99230.1] [location=59..10231]
FJ639713.1_cds_ACL99231.1_1 [protein=polyprotein] [protein_id=ACL99231.1] [location=59..10231]
FJ639714.1_cds_ACL99232.1_1 [protein=polyprotein] [protein_id=ACL99232.1] [location=60..10232]
FJ639715.1_cds_ACL99233.1_1 [protein=polyprotein] [protein_id=ACL99233.1] [location=59..10231]
FJ639716.1_cds_ACL99234.1_1 [protein=polyprotein] [protein_id=ACL99234.1] [location=59..10231]
FJ639719.1_cds_ACL99237.1_1 [protein=polyprotein] [protein_id=ACL99237.1] [location=59..10231]
FJ639720.1_cds_ACL99238.1_1 [protein=polyprotein] [protein_id=ACL99238.1] [location=59..10231]
FJ639721.1_cds_ACL99239.1_1 [protein=polyprotein] [protein_id=ACL99239.1] [location=59..10231]
FJ639722.1_cds_ACL99240.1_1 [protein=polyprotein] [protein_id=ACL99240.1] [location=59..10231]
FJ639723.1_cds_ACL99241.1_1 [protein=polyprotein] [protein_id=ACL99241.1] [location=59..10231]
FJ639724.1_cds_ACL99242.1_1 [protein=polyprotein] [protein_id=ACL99242.1] [location=59..10231]
FJ639725.1_cds_ACL99243.1_1 [protein=polyprotein] [protein_id=ACL99243.1] [location=59..10231]
FJ639726.1_cds_ACL99244.1_1 [protein=polyprotein] [protein_id=ACL99244.1] [location=59..10231]
FJ639727.1_cds_ACL99245.1_1 [protein=polyprotein] [protein_id=ACL99245.1] [location=59..10231]
FJ639728.1_cds_ACL99246.1_1 [protein=polyprotein] [protein_id=ACL99246.1] [location=59..10231]
FJ639729.1_cds_ACL99247.1_1 [protein=polyprotein] [protein_id=ACL99247.1] [location=59..10231]
FJ639730.1_cds_ACL99248.1_1 [protein=polyprotein] [protein_id=ACL99248.1] [location=59..10231]
FJ639731.1_cds_ACL99249.1_1 [protein=polyprotein] [protein_id=ACL99249.1] [location=59..10231]
FJ639746.1_cds_ACL99033.1_1 [protein=polyprotein] [protein_id=ACL99033.1] [location=59..10231]
FJ639747.1_cds_ACL99034.1_1 [protein=polyprotein] [protein_id=ACL99034.1] [location=59..10231]
FJ639749.1_cds_ACL99036.1_1 [protein=polyprotein] [protein_id=ACL99036.1] [location=58..10230]
FJ639750.1_cds_ACL99037.1_1 [protein=polyprotein] [protein_id=ACL99037.1] [location=59..10231]
FJ639751.1_cds_ACL99038.1_1 [protein=polyprotein] [protein_id=ACL99038.1] [location=59..10231]
FJ639752.1_cds_ACL99039.1_1 [protein=polyprotein] [protein_id=ACL99039.1] [location=59..10231]
FJ639753.1_cds_ACL99040.1_1 [protein=polyprotein] [protein_id=ACL99040.1] [location=58..10230]
FJ639754.1_cds_ACL99041.1_1 [protein=polyprotein] [protein_id=ACL99041.1] [location=59..10231]
FJ639755.1_cds_ACL99042.1_1 [protein=polyprotein] [protein_id=ACL99042.1] [location=59..10231]
FJ639756.1_cds_ACL99043.1_1 [protein=polyprotein] [protein_id=ACL99043.1] [location=59..10231]
FJ639757.1_cds_ACL99044.1_1 [protein=polyprotein] [protein_id=ACL99044.1] [location=58..10230]
FJ639758.1_cds_ACL99045.1_1 [protein=polyprotein] [protein_id=ACL99045.1] [location=59..10231]
FJ639759.1_cds_ACL99046.1_1 [protein=polyprotein] [protein_id=ACL99046.1] [location=59..10231]
FJ639760.1_cds_ACL99047.1_1 [protein=polyprotein] [protein_id=ACL99047.1] [location=60..10232]
FJ639761.1_cds_ACL99048.1_1 [protein=polyprotein] [protein_id=ACL99048.1] [location=59..10231]
FJ639762.1_cds_ACL99049.1_1 [protein=polyprotein] [protein_id=ACL99049.1] [location=62..10234]
FJ639763.1_cds_ACL99050.1_1 [protein=polyprotein] [protein_id=ACL99050.1] [location=59..10231]
FJ639765.1_cds_ACL99052.1_1 [protein=polyprotein] [protein_id=ACL99052.1] [location=59..10231]
FJ639766.1_cds_ACL99053.1_1 [protein=polyprotein] [protein_id=ACL99053.1] [location=59..10231]
FJ639767.1_cds_ACL99054.1_1 [protein=polyprotein] [protein_id=ACL99054.1] [location=58..10230]
FJ639768.1_cds_ACL99055.1_1 [protein=polyprotein] [protein_id=ACL99055.1] [location=59..10231]
FJ639769.1_cds_ACL99056.1_1 [protein=polyprotein] [protein_id=ACL99056.1] [location=58..10230]
FJ639770.1_cds_ACL99057.1_1 [protein=polyprotein] [protein_id=ACL99057.1] [location=59..10231]
FJ639771.1_cds_ACL99058.1_1 [protein=polyprotein] [protein_id=ACL99058.1] [location=58..10230]
FJ639772.1_cds_ACL99059.1_1 [protein=polyprotein] [protein_id=ACL99059.1] [location=59..10231]
FJ639774.1_cds_ACL99061.1_1 [protein=polyprotein] [protein_id=ACL99061.1] [location=58..10230]
FJ639775.1_cds_ACL99062.1_1 [protein=polyprotein] [protein_id=ACL99062.1] [location=59..10231]
FJ639776.1_cds_ACL99063.1_1 [protein=polyprotein] [protein_id=ACL99063.1] [location=59..10231]
FJ639777.1_cds_ACL99064.1_1 [protein=polyprotein] [protein_id=ACL99064.1] [location=59..10231]
FJ639778.1_cds_ACL99065.1_1 [protein=polyprotein] [protein_id=ACL99065.1] [location=59..10231]
FJ639779.1_cds_ACL99066.1_1 [protein=polyprotein] [protein_id=ACL99066.1] [location=59..10231]
FJ639780.1_cds_ACL99067.1_1 [protein=polyprotein] [protein_id=ACL99067.1] [location=60..10232]
FJ639781.1_cds_ACL99068.1_1 [protein=polyprotein] [protein_id=ACL99068.1] [location=59..10231]
FJ639782.1_cds_ACL99069.1_1 [protein=polyprotein] [protein_id=ACL99069.1] [location=65..10237]
FJ639784.1_cds_ACL99071.1_1 [protein=polyprotein] [protein_id=ACL99071.1] [location=59..10231]
FJ639785.1_cds_ACL99072.1_1 [protein=polyprotein] [protein_id=ACL99072.1] [location=59..10231]
FJ639786.1_cds_ACL99073.1_1 [protein=polyprotein] [protein_id=ACL99073.1] [location=65..10237]
FJ639787.1_cds_ACL99074.1_1 [protein=polyprotein] [protein_id=ACL99074.1] [location=59..10231]
FJ639789.1_cds_ACL99076.1_1 [protein=polyprotein] [protein_id=ACL99076.1] [location=59..10231]
FJ639790.1_cds_ACL99077.1_1 [protein=polyprotein] [protein_id=ACL99077.1] [location=64..10236]
FJ639791.1_cds_ACL99078.1_1 [protein=polyprotein] [protein_id=ACL99078.1] [location=58..10230]
FJ639792.1_cds_ACL99079.1_1 [protein=polyprotein] [protein_id=ACL99079.1] [location=59..10231]
FJ639793.1_cds_ACL99080.1_1 [protein=polyprotein] [protein_id=ACL99080.1] [location=59..10231]
FJ639795.1_cds_ACL99082.1_1 [protein=polyprotein] [protein_id=ACL99082.1] [location=58..10230]
FJ639798.1_cds_ACL99085.1_1 [protein=polyprotein] [protein_id=ACL99085.1] [location=59..10231]
FJ639799.1_cds_ACL99086.1_1 [protein=polyprotein] [protein_id=ACL99086.1] [location=63..10235]
FJ639800.1_cds_ACL99087.1_1 [protein=polyprotein] [protein_id=ACL99087.1] [location=59..10231]
FJ639801.1_cds_ACL99088.1_1 [protein=polyprotein] [protein_id=ACL99088.1] [location=59..10231]
FJ639803.1_cds_ACL99090.1_1 [protein=polyprotein] [protein_id=ACL99090.1] [location=59..10231]
FJ639804.1_cds_ACL99091.1_1 [protein=polyprotein] [protein_id=ACL99091.1] [location=59..10231]
FJ639805.1_cds_ACL99092.1_1 [protein=polyprotein] [protein_id=ACL99092.1] [location=59..10231]
FJ639807.1_cds_ACL99094.1_1 [protein=polyprotein] [protein_id=ACL99094.1] [location=59..10231]
FJ639810.1_cds_ACL99097.1_1 [protein=polyprotein] [protein_id=ACL99097.1] [location=59..10231]
FJ639816.1_cds_ACL99103.1_1 [protein=polyprotein] [protein_id=ACL99103.1] [location=59..10231]
FJ639817.1_cds_ACL99104.1_1 [protein=polyprotein] [protein_id=ACL99104.1] [location=59..10231]
FJ639825.1_cds_ACL99112.1_1 [protein=polyprotein] [protein_id=ACL99112.1] [location=59..10231]
FJ639826.1_cds_ACL99113.1_1 [protein=polyprotein] [protein_id=ACL99113.1] [location=64..10236]
FJ639827.1_cds_ACL99114.1_1 [protein=polyprotein] [protein_id=ACL99114.1] [location=59..10231]
FJ478456.1_cds_ACK28187.1_1 [protein=polyprotein] [protein_id=ACK28187.1] [location=59..10231]
EF643017.1_cds_ABV03585.1_1 [protein=polyprotein] [protein_id=ABV03585.1] [location=95..10267]
FJ373302.1_cds_ACJ04178.1_1 [protein=polyprotein] [protein_id=ACJ04178.1] [location=63..10235]
FJ373303.1_cds_ACJ04179.1_1 [protein=polyprotein] [protein_id=ACJ04179.1] [location=59..10231]
FJ373304.1_cds_ACJ04180.1_1 [protein=polyprotein] [protein_id=ACJ04180.1] [location=64..10236]
FJ373306.1_cds_ACJ04182.1_1 [protein=polyprotein] [protein_id=ACJ04182.1] [location=59..10231]
FJ390371.1_cds_ACJ04183.1_1 [protein=polyprotein] [protein_id=ACJ04183.1] [location=59..10231]
FJ390372.1_cds_ACJ04184.1_1 [protein=polyprotein] [protein_id=ACJ04184.1] [location=69..10241]
FJ390373.1_cds_ACJ04185.1_1 [protein=polyprotein] [protein_id=ACJ04185.1] [location=59..10231]
FJ390375.1_cds_ACJ04187.1_1 [protein=polyprotein] [protein_id=ACJ04187.1] [location=61..10233]
FJ390376.1_cds_ACJ04188.1_1 [protein=polyprotein] [protein_id=ACJ04188.1] [location=80..10252]
FJ390377.1_cds_ACJ04189.1_1 [protein=polyprotein] [protein_id=ACJ04189.1] [location=61..10233]
FJ410176.1_cds_ACJ04218.1_1 [protein=polyprotein] [protein_id=ACJ04218.1] [location=56..10228]
FJ410177.1_cds_ACJ04219.1_1 [protein=polyprotein] [protein_id=ACJ04219.1] [location=59..10231]
FJ410178.1_cds_ACJ04220.1_1 [protein=polyprotein] [protein_id=ACJ04220.1] [location=58..10230]
FJ410229.1_cds_ACJ04271.1_1 [protein=polyprotein] [protein_id=ACJ04271.1] [location=59..10231]
FJ182004.1_cds_ACH99651.1_1 [protein=polyprotein] [protein_id=ACH99651.1] [location=59..10231]
FJ182005.1_cds_ACH99652.1_1 [protein=polyprotein] [protein_id=ACH99652.1] [location=61..10233]
FJ182006.1_cds_ACH99653.1_1 [protein=polyprotein] [protein_id=ACH99653.1] [location=59..10231]
FJ182007.1_cds_ACH99654.1_1 [protein=polyprotein] [protein_id=ACH99654.1] [location=59..10231]
FJ182008.1_cds_ACH99655.1_1 [protein=polyprotein] [protein_id=ACH99655.1] [location=59..10231]
FJ182009.1_cds_ACH99656.1_1 [protein=polyprotein] [protein_id=ACH99656.1] [location=59..10231]
FJ182010.1_cds_ACH99657.1_1 [protein=polyprotein] [protein_id=ACH99657.1] [location=59..10231]
FJ182011.1_cds_ACH99658.1_1 [protein=polyprotein] [protein_id=ACH99658.1] [location=61..10233]
FJ182013.1_cds_ACH99660.1_1 [protein=polyprotein] [protein_id=ACH99660.1] [location=59..10231]
FJ182015.1_cds_ACH99662.1_1 [protein=polyprotein] [protein_id=ACH99662.1] [location=59..10231]
FJ182037.1_cds_ACH99665.1_1 [protein=polyprotein] [protein_id=ACH99665.1] [location=59..10231]
FJ182038.1_cds_ACH99666.1_1 [protein=polyprotein] [protein_id=ACH99666.1] [location=59..10231]
FJ182039.1_cds_ACH99667.1_1 [protein=polyprotein] [protein_id=ACH99667.1] [location=59..10231]
FJ182040.1_cds_ACH99668.1_1 [protein=polyprotein] [protein_id=ACH99668.1] [location=63..10235]
FJ182041.1_cds_ACH99669.1_1 [protein=polyprotein] [protein_id=ACH99669.1] [location=59..10231]
FJ205870.1_cds_ACH99676.1_1 [protein=polyprotein] [protein_id=ACH99676.1] [location=59..10231]
FJ205871.1_cds_ACH99677.1_1 [protein=polyprotein] [protein_id=ACH99677.1] [location=62..10234]
EU854291.1_cds_ACH61683.1_1 [protein=polyprotein] [protein_id=ACH61683.1] [location=59..10231]
EU854292.1_cds_ACH61684.1_1 [protein=polyprotein] [protein_id=ACH61684.1] [location=59..10231]
EU854298.1_cds_ACH61690.1_1 [protein=polyprotein] [protein_id=ACH61690.1] [location=59..10231]
FJ024465.1_cds_ACH61715.1_1 [protein=polyprotein] [protein_id=ACH61715.1] [location=59..10231]
FJ024466.1_cds_ACH61716.1_1 [protein=polyprotein] [protein_id=ACH61716.1] [location=61..10233]
FJ024467.1_cds_ACH61717.1_1 [protein=polyprotein] [protein_id=ACH61717.1] [location=59..10231]
FJ024468.1_cds_ACH61718.1_1 [protein=polyprotein] [protein_id=ACH61718.1] [location=59..10231]
FJ024469.1_cds_ACH61719.1_1 [protein=polyprotein] [protein_id=ACH61719.1] [location=59..10231]
FJ024470.1_cds_ACH61720.1_1 [protein=polyprotein] [protein_id=ACH61720.1] [location=59..10231]
FJ024471.1_cds_ACH61721.1_1 [protein=polyprotein] [protein_id=ACH61721.1] [location=59..10231]
EU726768.1_cds_ACE63528.1_1 [protein=polyprotein] [protein_id=ACE63528.1] [location=59..10231]
EU726769.1_cds_ACE63529.1_1 [protein=polyprotein] [protein_id=ACE63529.1] [location=59..10231]
EU726771.1_cds_ACE63531.1_1 [protein=polyprotein] [protein_id=ACE63531.1] [location=59..10231]
EU726772.1_cds_ACE63532.1_1 [protein=polyprotein] [protein_id=ACE63532.1] [location=59..10231]
EU726773.1_cds_ACE63533.1_1 [protein=polyprotein] [protein_id=ACE63533.1] [location=61..10233]
EU726774.1_cds_ACE63534.1_1 [protein=polyprotein] [protein_id=ACE63534.1] [location=59..10231]
EU781136.1_cds_ACE63544.1_1 [protein=polyprotein] [protein_id=ACE63544.1] [location=59..10231]
EU781137.1_cds_ACE63545.1_1 [protein=polyprotein] [protein_id=ACE63545.1] [location=59..10231]
EU660407.1_cds_ACD13318.1_1 [protein=polyprotein] [protein_id=ACD13318.1] [location=74..10246]
EU660408.1_cds_ACD13319.1_1 [protein=polyprotein] [protein_id=ACD13319.1] [location=74..10246]
EU660409.1_cds_ACD13320.1_1 [protein=polyprotein] [protein_id=ACD13320.1] [location=74..10246]
EU660410.1_cds_ACD13321.1_1 [protein=polyprotein] [protein_id=ACD13321.1] [location=74..10246]
EU660411.1_cds_ACD13322.1_1 [protein=polyprotein] [protein_id=ACD13322.1] [location=74..10246]
EU660420.1_cds_ACD13331.1_1 [protein=polyprotein] [protein_id=ACD13331.1] [location=74..10246]
EU687196.1_cds_ACD13392.1_1 [protein=polyprotein] [protein_id=ACD13392.1] [location=64..10236]
EU687197.1_cds_ACD13393.1_1 [protein=polyprotein] [protein_id=ACD13393.1] [location=70..10242]
EU687198.1_cds_ACD13394.1_1 [protein=polyprotein] [protein_id=ACD13394.1] [location=86..10258]
EU687218.1_cds_ACD13402.1_1 [protein=polyprotein] [protein_id=ACD13402.1] [location=59..10231]
EU687219.1_cds_ACD13403.1_1 [protein=polyprotein] [protein_id=ACD13403.1] [location=66..10238]
EU687221.1_cds_ACD13405.1_1 [protein=polyprotein] [protein_id=ACD13405.1] [location=59..10231]
EU687226.1_cds_ACD13410.1_1 [protein=polyprotein] [protein_id=ACD13410.1] [location=56..10228]
EU687233.1_cds_ACD13417.1_1 [protein=polyprotein] [protein_id=ACD13417.1] [location=61..10236]
EU687234.1_cds_ACD13418.1_1 [protein=polyprotein] [protein_id=ACD13418.1] [location=59..10231]
EU687239.1_cds_ACD13423.1_1 [protein=polyprotein] [protein_id=ACD13423.1] [location=59..10231]
EU596492.1_cds_ACB87133.1_1 [protein=polyprotein] [protein_id=ACB87133.1] [location=59..10231]
EU596493.1_cds_ACB87134.1_1 [protein=polyprotein] [protein_id=ACB87134.1] [location=59..10231]
EU596494.1_cds_ACB87135.1_1 [protein=polyprotein] [protein_id=ACB87135.1] [location=59..10231]
EU569688.1_cds_ACB29496.1_1 [protein=polyprotein] [protein_id=ACB29496.1] [location=59..10231]
EU569689.1_cds_ACB29497.1_1 [protein=polyprotein] [protein_id=ACB29497.1] [location=59..10231]
EU569690.1_cds_ACB29498.1_1 [protein=polyprotein] [protein_id=ACB29498.1] [location=59..10231]
EU569691.1_cds_ACB29499.1_1 [protein=polyprotein] [protein_id=ACB29499.1] [location=62..10234]
EU529683.1_cds_ACA58320.1_1 [protein=polyprotein] [protein_id=ACA58320.1] [location=59..10231]
EU529684.1_cds_ACA58321.1_1 [protein=polyprotein] [protein_id=ACA58321.1] [location=73..10245]
EU529685.1_cds_ACA58322.1_1 [protein=polyprotein] [protein_id=ACA58322.1] [location=59..10231]
EU529686.1_cds_ACA58323.1_1 [protein=polyprotein] [protein_id=ACA58323.1] [location=59..10231]
EU529687.1_cds_ACA58324.1_1 [protein=polyprotein] [protein_id=ACA58324.1] [location=59..10231]
EU529688.1_cds_ACA58325.1_1 [protein=polyprotein] [protein_id=ACA58325.1] [location=59..10231]
EU529689.1_cds_ACA58326.1_1 [protein=polyprotein] [protein_id=ACA58326.1] [location=59..10231]
EU529690.1_cds_ACA58327.1_1 [protein=polyprotein] [protein_id=ACA58327.1] [location=59..10231]
EU529691.1_cds_ACA58328.1_1 [protein=polyprotein] [protein_id=ACA58328.1] [location=59..10231]
EU529692.1_cds_ACA58329.1_1 [protein=polyprotein] [protein_id=ACA58329.1] [location=59..10231]
EU529696.1_cds_ACA58333.1_1 [protein=polyprotein] [protein_id=ACA58333.1] [location=62..10234]
EU529697.1_cds_ACA58334.1_1 [protein=polyprotein] [protein_id=ACA58334.1] [location=59..10231]
EU529698.1_cds_ACA58335.1_1 [protein=polyprotein] [protein_id=ACA58335.1] [location=59..10231]
EU529699.1_cds_ACA58336.1_1 [protein=polyprotein] [protein_id=ACA58336.1] [location=59..10231]
EU529702.1_cds_ACA58339.1_1 [protein=polyprotein] [protein_id=ACA58339.1] [location=59..10231]
EU529703.1_cds_ACA58340.1_1 [protein=polyprotein] [protein_id=ACA58340.1] [location=59..10231]
EU529704.1_cds_ACA58341.1_1 [protein=polyprotein] [protein_id=ACA58341.1] [location=59..10231]
EU529705.1_cds_ACA58342.1_1 [protein=polyprotein] [protein_id=ACA58342.1] [location=59..10231]
[truncated: 52 more rows]

## Sheet: Dengue 4 viruses (n=205)
Accession number in the NCBI	year
[truncated: 205 more rows]
