# Supplementary material for: Componential usage patterns in dengue 4 viruses reveal their better evolutionary adaptation to humans
Source: Front Microbiol. 2022 Sep 20;13:935678. doi: 10.3389/fmicb.2022.935678 (PMC9530264; doi:10.3389/fmicb.2022.935678)
Supplement: Supplementary File 2 — The relative synonymous codon usage (RSCU) values of humans. [file Data_Sheet_2.xls]

## Sheet: Sheet1
Amino acid	Codon	Number	RSCU
Phe	UUU	1318833	1.00138
	UUC	1315194	0.998618
Leu	UUA	681269	0.551866
	UUG	1029788	0.834186
	CUU	1080743	0.875462
	CUC	1334994	1.08142
	CUA	571164	0.462675
	CUG	2708939	2.19439
Ile	AUU	1276086	1.15514
	AUC	1409846	1.27623
	AUA	628164	0.568629
Met	AUG	1635241	1
Val	GUU	903460	0.812166
	GUC	1010629	0.908506
	GUA	590790	0.531091
	GUG	1944753	1.74824
Ser	UCU	1288804	1.18036
	UCC	1300337	1.19092
	UCA	1085937	0.994561
	UCG	305761	0.280033
Pro	CCU	1452305	1.21708
	CCC	1419579	1.18965
	CCA	1435748	1.2032
	CCG	465464	0.390073
Thr	ACU	1095655	1.06638
	ACC	1330859	1.2953
	ACA	1261043	1.22735
	ACG	422247	0.410966
Ala	GCU	1440449	1.12415
	GCC	1938366	1.51273
	GCA	1299905	1.01447
	GCG	446750	0.348651
Tyr	UAU	932788	0.955475
	UAC	1019723	1.04452
Ter	UAA	31934	0.843016
	UAG	25395	0.670395
His	CAU	908328	0.902104
	CAC	1105470	1.0979
Gln	CAA	1085694	0.576024
	CAG	2683923	1.42398
Asn	AAU	1427125	1.01298
	AAC	1390562	0.987024
Lys	AAA	2140102	0.936435
	AAG	2430641	1.06356
Asp	GAU	1853634	1.00347
	GAC	1840832	0.996535
Glu	GAA	2606418	0.930925
	GAG	2993214	1.06908
Cys	UGU	797394	0.990538
	UGC	812628	1.00946
Ter	UGA	56313	1.48659
Trp	UGG	874924	1
Arg	CGU	343422	0.487276
	CGC	653209	0.926828
	CGA	487569	0.691804
	CGG	803350	1.13986
Ser	AGU	1079077	0.988278
	AGC	1491337	1.36585
Arg	AGA	1021578	1.4495
	AGG	919546	1.30473
Gly	GGU	819941	0.691034
	GGC	1485558	1.25201
	GGA	1302533	1.09775
	GGG	1138139	0.959206

## Sheet: Sheet2
		CH1	CH2	CH3	CH4	CH5	CH6	CH7	CH8	CH9	CH10	CH11	CH12	CH13	CH14	CH15	CH16	CH17	CH18	CH19	CH20	CH21	CH22	CH23	CH24	Totle
Amino acid	codon	Number	Number	Number	Number	Number	Number	Number	Number	Number	Number	Number	Number	Number	Number	Number	Number	Number	Number	Number	Number	Number	Number	Number	Number	Number	RSCU
Phe	UUU	121641	122096	93996	71229	62407	77969	64632	49874	54726	64500	66248	72660	34569	44537	46496	38615	55962	25614	50055	23406	12777	19047	41714	4063	1318833	1.00138
	UUC	127337	101743	85075	47813	50495	62922	61255	43200	58011	56121	77932	68890	21958	39162	43576	61703	79230	23747	86956	30353	13419	32486	38435	3375	1315194	0.998618
Leu	UUA	63122	68692	51948	40918	36548	47700	32406	26669	27450	34693	30800	39793	21737	25805	24143	14979	22253	14623	12511	8985	6957	5488	20420	2629	681269	0.551866
	UUG	99225	94818	76570	51624	46882	65092	45905	37835	43887	50657	51689	56182	23772	37272	37951	32893	45466	20949	31822	17812	9976	14173	33185	4151	1029788	0.834186
	CUU	103422	103280	78550	56602	50552	70818	49330	39174	44825	51248	53296	59788	27497	38345	38087	31358	43887	20024	42041	17787	9748	13990	33789	3305	1080743	0.875462
	CUC	126818	101332	87305	47215	46883	71153	57737	43908	60131	58224	81772	69861	20804	42097	45095	67461	82315	22159	82569	32121	13498	33815	37853	2868	1334994	1.08142
	CUA	58613	51868	43303	28457	26525	36203	24322	22106	23118	26287	30207	34336	12919	20369	20988	16402	24967	10458	17838	9438	4946	7741	18215	1538	571164	0.462675
	CUG	264446	198314	163978	90181	93851	136439	115445	97280	120830	111675	169712	140295	38869	84971	90676	146038	181949	40688	177713	64250	29104	76777	69723	5735	2708939	2.19439
Ile	AUU	118531	132845	93034	70834	62581	80223	59312	46438	54039	61349	61734	73629	33215	42953	46199	31579	51261	23757	40557	20217	11771	13695	42250	4083	1276086	1.15514
	AUC	133478	114355	99195	52928	52687	68710	61161	48297	63497	63295	83885	76979	23031	41903	48419	62816	88344	24988	75629	32611	15873	33174	41553	3038	1409846	1.27623
	AUA	57076	67281	48432	36075	32865	40122	30922	24626	26278	32562	26431	35102	18587	22462	22486	14340	21042	12634	16761	9288	6304	4852	19660	1976	628164	0.568629
Met	AUG	151886	142161	114620	70829	68278	92863	68253	62077	71287	75595	92146	91129	34546	53941	56615	59950	84635	32157	72116	33875	15617	32527	54063	4075	1635241	1
Val	GUU	82760	100770	68050	51232	43644	58962	42118	32343	36709	44102	40819	48471	24821	30149	32305	23927	34103	18238	24608	14317	8893	9199	29543	3377	903460	0.812166
	GUC	97957	87145	68808	38743	39489	50232	44839	33259	46871	45820	57787	51371	18130	28949	33913	45570	58003	16625	58573	22671	11264	21858	29896	2856	1010629	0.908506
	GUA	56499	63038	44155	33444	28761	37772	24212	22906	24872	30489	28905	32886	15852	21019	20771	14674	22679	10717	16129	8632	5116	5962	19058	2242	590790	0.531091
	GUG	184585	158835	129460	74965	73454	97861	86977	69089	88588	86996	115872	98324	31261	59073	64810	91246	115507	33034	111443	44155	21445	48685	54423	4665	1944753	1.74824
Ser	UCU	124078	122150	88819	64821	59038	84078	54883	48399	53109	64919	66488	71343	31493	42309	47060	39052	56203	25191	48755	21477	12532	16348	41372	4887	1288804	1.18036
	UCC	129575	98229	84381	49932	50041	65347	56594	43842	57726	63584	77058	68473	19829	39910	41705	58046	75525	24155	85513	28837	13490	28906	36736	2903	1300337	1.19092
	UCA	107201	100094	78910	54247	50695	63735	46888	38750	43921	58737	52643	59145	26253	34305	36821	33819	45923	21949	51110	19247	9644	13831	34402	3667	1085937	0.994561
	UCG	27640	22563	16132	11268	12200	14177	14665	11461	14148	13771	15840	14219	5300	9618	8563	16726	18785	6401	23714	8431	3634	7288	8447	770	305761	0.280033
Pro	CCU	145361	130875	101073	64071	59143	84274	67486	52419	62293	71982	76084	76645	30008	44286	48926	53005	72004	26928	67137	27459	13325	23683	49125	4713	1452305	1.21708
	CCC	138055	99296	86697	44106	47502	67675	66122	46688	64800	62035	86976	72914	18401	39732	42355	75504	95263	22847	115141	35049	13422	36856	39571	2572	1419579	1.18965
	CCA	140473	132471	106386	65317	61862	80125	63587	52456	62029	75520	75384	74851	29626	42267	47896	50033	71209	26393	61975	27384	12977	22756	47596	5175	1435748	1.2032
	CCG	41426	32362	24782	17893	15591	21615	23817	16751	22330	19860	25829	20815	7703	13028	12082	26691	30363	9031	39181	12559	5540	13395	11953	867	465464	0.390073
Thr	ACU	103830	107122	79671	57075	47130	66381	48466	37285	44323	52700	54324	60445	25702	35160	36694	32005	45740	20222	56680	18258	9443	13738	39362	3899	1095655	1.06638
	ACC	127449	105342	86507	48380	48910	69468	57573	45892	59220	58742	81495	68319	20381	38392	41361	58999	79398	24099	90029	31512	13999	31172	40540	3680	1330859	1.2953
	ACA	118139	121039	98895	65961	55812	74995	54314	45499	53487	62575	64816	68059	29554	39990	42895	37888	53829	23827	55563	22586	11087	18530	37569	4134	1261043	1.22735
	ACG	35722	30810	23946	14918	15223	19276	20156	16837	19871	20584	24219	20024	7400	12390	12709	22533	25726	8842	30862	11379	6027	11814	9867	1112	422247	0.410966
Ala	GCU	143220	137551	101715	65624	60891	86966	60312	51399	60700	68619	77073	77672	30272	47550	50906	48992	71867	25068	55969	26971	13394	24826	48325	4567	1440449	1.12415
	GCC	182446	146834	123529	63909	66182	95421	84687	68156	89936	85111	114851	97229	27029	57030	61002	100414	124807	31652	137607	48213	19500	54093	54339	4389	1938366	1.51273
	GCA	123392	121265	94521	61896	55386	79192	55652	48860	56286	62845	66563	70069	30900	41897	44568	43355	61743	23768	49627	25815	12398	23663	41464	4780	1299905	1.01447
	GCG	37782	30191	22209	15990	16994	20169	22227	17611	21316	20386	23128	19755	7810	13602	12640	26263	28720	9312	37774	12096	6018	12833	10760	1164	446750	0.348651
Tyr	UAU	87751	94051	68529	49008	43329	53283	43934	35303	39190	45458	45881	49523	23938	30496	33529	24378	38606	17608	37604	15076	8170	12142	31540	4461	932788	0.955475
	UAC	96192	88803	67500	40899	39969	48200	44739	35939	45797	47641	55717	51845	18322	30475	33245	44255	59251	17628	62118	22760	10435	24882	29797	3314	1019723	1.04452
Ter	UAA	3213	2486	1910	1535	1755	1801	1467	1104	1279	1509	1889	1685	793	1155	1263	912	1170	731	1458	690	377	356	1299	97	31934	0.843016
	UAG	2528	1850	1887	1008	1025	1209	1068	985	1137	1115	1527	1364	342	740	763	1162	1357	361	1577	699	157	695	784	55	25395	0.670395
His	CAU	80576	81513	65112	46848	40350	54608	40075	33296	37141	45521	42963	46118	21791	29658	32674	27390	37270	17846	57784	15158	7788	12194	30047	4607	908328	0.902104
	CAC	101206	84531	67637	43423	39714	55529	52062	39281	51178	50494	62091	53082	17810	32982	36748	54921	64710	20255	80087	26759	11850	25852	30162	3106	1105470	1.0979
Gln	CAA	104688	104322	81561	54950	47642	72799	50268	42267	44094	55193	50861	62222	27700	36897	37395	29965	44404	19930	37941	18191	10598	12138	35954	3714	1085694	0.576024
	CAG	264667	202811	178704	95003	96975	156212	115647	98857	122249	119293	153254	145615	46322	80546	91038	121751	161747	46559	147996	64768	27006	63779	75674	7450	2683923	1.42398
Asn	AAU	129155	142284	106336	79746	70793	86752	64874	56249	58725	76184	68637	81171	38797	48712	50486	38186	53452	27842	42526	23648	13351	14464	47993	6762	1427125	1.01298
	AAC	128920	115611	93621	60345	56561	70629	61828	47826	63840	66055	78801	74802	27310	43901	47682	56881	75530	26742	72007	31051	14202	30081	41926	4410	1390562	0.987024
Lys	AAA	196490	231570	161852	113953	101041	133563	95475	80302	86448	113330	92555	114764	58311	72779	70787	54048	80518	43280	87929	35186	20926	21582	67367	6046	2140102	0.936435
	AAG	233873	216863	166728	97930	95785	126409	99230	84241	106180	117458	134231	129626	45614	75555	82519	94608	135616	42363	129157	56932	24866	52454	76938	5465	2430641	1.06356
Asp	GAU	172918	191154	132763	96753	89020	113641	80320	71628	77241	96506	92567	96492	48043	67318	66516	51969	77964	35779	53316	31027	16535	24692	63539	5933	1853634	1.00347
	GAC	172194	154246	120958	73787	72385	89476	79532	65518	87092	85116	107217	88956	31189	57890	59226	83045	108699	34267	106171	42306	18950	46278	51798	4536	1840832	0.996535
Glu	GAA	252334	263956	192252	135835	123455	166967	112657	102904	109025	132689	118583	146556	68282	92860	92300	66138	102717	51336	89040	42926	25189	28373	83190	6854	2606418	0.930925
	GAG	294979	229777	193138	105001	107089	156241	120826	112678	132869	132819	175151	154631	44577	94980	102061	135363	185537	50158	190741	73420	30032	74201	90969	5976	2993214	1.06908
Cys	UGU	75511	67890	51717	38510	34167	42695	37869	30259	33164	39875	36604	41561	18640	23998	25743	25601	33565	16063	62266	15890	7508	11139	23999	3160	797394	0.990538
	UGC	80230	64458	55489	31634	30127	37942	38217	28687	37677	36386	43026	38910	13974	23521	28163	38809	46219	14993	50956	19769	8757	19358	23060	2266	812628	1.00946
Ter	UGA	5363	3781	3532	2092	2005	2555	2700	1988	2227	2767	3358	3274	957	1693	1545	2604	3572	933	3775	1478	694	1501	1729	190	56313	1.48659
Trp	UGG	83766	77134	56310	35281	34290	49069	41945	30531	39119	37926	47883	46404	15890	27064	30439	37749	48210	14396	46744	17443	9002	19308	25882	3139	874924	1
Arg	CGU	33224	30947	23418	13851	13697	19060	13752	12849	14400	14223	19108	18417	7013	11445	12168	14237	18068	5522	18528	6370	3157	6801	11870	1297	343422	0.487276
	CGC	63951	45620	38832	18037	20701	29094	28996	23745	29169	24830	42252	30719	7608	20148	19481	34944	44965	10866	56638	16998	6319	20348	17841	1107	653209	0.926828
	CGA	49763	41464	33937	22094	19200	28437	20750	18385	18679	22881	26622	27586	10756	16472	17932	16564	25950	9501	21822	9643	4017	8426	15345	1343	487569	0.691804
	CGG	80851	54265	49090	22953	26124	37620	32435	29726	34065	32328	53905	41066	10072	24858	25101	43404	59485	12573	60239	21001	7161	23438	20142	1448	803350	1.13986
Ser	AGU	102261	103472	76565	56253	48146	67015	44346	41636	43971	54171	56372	55808	25179	35650	40021	32110	47087	22010	45451	18834	10000	13993	34749	3977	1079077	0.988278
	AGC	146047	113250	94161	56711	56549	73943	64992	52766	67238	67836	89873	73080	24291	46164	50033	69182	92666	25930	91040	35571	15431	37697	43270	3616	1491337	1.36585
Arg	AGA	95352	103703	70930	56801	47716	62853	44481	41850	41666	52588	43056	53731	30249	33478	34830	27842	39052	19870	43319	18300	10902	13068	32075	3866	1021578	1.4495
	AGG	88465	74907	59448	38992	35966	50977	39754	35958	41501	44480	48199	45422	19335	28115	31210	39249	50039	16535	47002	21902	10565	21186	27867	2472	919546	1.30473
Gly	GGU	76820	77263	55778	39109	35003	48781	36847	30500	34349	40857	40556	45050	17720	25406	28267	27255	37707	14490	39843	14883	7919	13399	28954	3185	819941	0.691034
	GGC	146806	110600	87861	50124	53267	67954	66412	51341	67542	66800	88898	71846	20754	43654	46406	74679	93069	24565	113683	38162	13911	38885	44633	3706	1485558	1.25201
	GGA	122627	123440	90435	67797	58893	76420	62358	51739	54329	65999	61897	69356	31588	38727	45705	39536	55740	24104	59745	24166	12276	18513	42886	4257	1302533	1.09775
	GGG	113987	84745	68060	40762	39994	58511	51052	38140	50782	51345	66548	56994	16556	33642	35428	54949	69141	19602	83867	28520	12075	27247	33572	2620	1138139	0.959206
